# Supplementary material for: Impact of maternal age on obstetric and neonatal outcome with emphasis on primiparous adolescents and older women: a Swedish Medical Birth Register Study
Source: PubMed Central journal article supplement — BMJ Open. 2014 Nov 11;4(11):e005840. doi: 10.1136/bmjopen-2014-005840 (PMC4244420; doi:10.1136/bmjopen-2014-005840), 2014-11-11
Supplement: bmjopen-2014-005840.draft_revisions.pdf [file bmjopen-2014-005840.draft_revisions.pdf]

# BMJ Open

## Impact of maternal age on obstetric and neonatal outcome with emphasis on adolescents and older women-a Swedish Medical Birth Register Study.

|                                 |                                                                                                                                                                                                                                                                                                                                                  |
|---------------------------------|--------------------------------------------------------------------------------------------------------------------------------------------------------------------------------------------------------------------------------------------------------------------------------------------------------------------------------------------------|
| Journal:                        | <i>BMJ Open</i>                                                                                                                                                                                                                                                                                                                                  |
| Manuscript ID:                  | bmjopen-2014-005840                                                                                                                                                                                                                                                                                                                              |
| Article Type:                   | Research                                                                                                                                                                                                                                                                                                                                         |
| Date Submitted by the Author:   | 02-Jun-2014                                                                                                                                                                                                                                                                                                                                      |
| Complete List of Authors:       | Blomberg, Marie; Department of Obstetrics and Gynaecology, Department of Clinical and Experimental Medicine<br>Birch Tyrberg, Rasmus; Department of Obstetrics and Gynaecology, Department of Clinical and Experimental Medicine<br>Kjølhede, Preben; Department of Obstetrics and Gynaecology, Department of Clinical and Experimental Medicine |
| <b>Primary Subject Heading</b>: | Obstetrics and gynaecology                                                                                                                                                                                                                                                                                                                       |
| Secondary Subject Heading:      | Epidemiology                                                                                                                                                                                                                                                                                                                                     |
| Keywords:                       | maternal age, obstetric outcome, neonatal outcome                                                                                                                                                                                                                                                                                                |
|                                 |                                                                                                                                                                                                                                                                                                                                                  |

SCHOLARONE™  
Manuscripts

1  
2  
3  
4 **Impact of maternal age on obstetric and neonatal outcome with**  
5  
6  
7 **emphasis on adolescents and older women-a Swedish Medical Birth**  
8

9  
10 **Register Study.**  
11

12  
13  
14  
15  
16 Marie Blomberg MD, PhD, Rasmus Birch Tyrberg, BMs, and Preben Kjölhede, MD, PhD

17 Department of Obstetrics and Gynaecology and Department of Clinical and Experimental Medicine,

18  
19 Linköping University, Linköping, Sweden  
20  
21  
22

23  
24  
25  
26 Corresponding author:

27  
28 Marie Blomberg, MD, PhD

29  
30 Department of Obstetrics and Gynaecology,

31  
32 University Hospital

33  
34 581 85 Linköping

35  
36 Sweden

37  
38  
39 Phone +46 10 103 00 00

40  
41  
42 E-mail: marie.blomberg@lio.se

43  
44  
45 Keywords: maternal age, mode of delivery, neonatal outcome, obstetric outcome, adolescents

46  
47  
48 Word count: 2751 words  
49  
50  
51  
52  
53  
54  
55  
56  
57  
58  
59  
60

## Abstract

**Objectives:** To evaluate the associations between maternal age and obstetric and neonatal outcomes in primiparous women with emphasis on teenagers and older women.

**Design:** A population-based cohort study.

**Setting:** The Swedish Medical Birth Register.

**Participants:** Primiparous women with singleton births from 1992 through 2010 (N=798,674) were divided into seven age groups: <17 years, 17-19 years, and additional five five-year classes. The reference group consisted of the women age 25-29 years.

**Primary outcome:** Obstetric and neonatal outcome.

**Results:** The teenager groups had significantly more vaginal deliveries (OR 2.04 (1.79-2.32) and 1.95 (1.88-2.02) for age <17 years and 17-19 years, respectively); fewer caesarean sections (OR 0.57 (0.48-0.67) and 0.55 (0.53-0.58)), and instrumental deliveries (OR 0.43 (0.36-0.52) and 0.50 (0.48-0.53)) compared with women age 25-29. The opposite was found among older women reaching a 4-fold increased risk for caesarean section. The teenagers showed no increased risk of adverse neonatal outcome but presented an increased risk of prematurity <32 weeks (OR 1.66 (1.10-2.51) and 1.20 (1.04-1.38)). Women with advancing age ( $\geq 30$  years) revealed significantly increased risks of prematurity, perineal lacerations, preeclampsia, abruption, placenta previa, postpartum haemorrhage and unfavourable neonatal outcomes compared with women age 25-29.

**Conclusions:** For clinicians counselling young mothers it is of importance to highlight the obstetrically positive consequences that fewer maternal complications and favourable neonatal outcomes are expected. The average age of primiparous women has increased and women over 30 years seem to be at a higher risk of severe adverse obstetric and neonatal outcome. There is a need to develop surveillance programs in obstetric care customized for older women.

## Article summary

### Impact of maternal age on obstetric and neonatal outcome with emphasis on adolescents and older women-a Swedish Medical Birth Register Study.

Strengths and limitations of this study:

- A strength of the present study is that it includes primiparous women of an entire country where the antenatal care program is equally available to all pregnant women and is comprehensive.
- Another advantage is the large number of individuals available for evaluation, which makes it possible to divide the study population into subgroups with sufficient numbers in each stratum to provide high statistical power.
- A limitation is that the external validity is reduced to facilities with similar socio-economic and demographic characteristics and health care systems with comparable standards.
- The Swedish medical birth register contain a large body of information concerning the mother and the child but only the available data in the register could be used for outcome evaluation and adjustments for putative confounders.

## INTRODUCTION

There are a large number of studies evaluating obstetric and neonatal outcome over the full range of reproductive maternal ages, but especially with a focus on the youngest and the oldest mothers. Young mothers have been shown to be exposed to an increased risk of anaemia, low birth weight, foetal death, eclampsia and preterm birth although they at the same time were more likely to have a spontaneous normal vaginal delivery and the risk of preeclampsia and post-partum haemorrhage were significantly decreased.[1-6] These studies evaluated outcomes in developed countries. Many studies performed in developing countries presented in recent years on the topic of teenage pregnancies have found similar obstetric and neonatal outcomes.[7-11]

Complications during pregnancy and delivery at advanced maternal age (either defined as 35 years and older or 40 years or older) have also been evaluated in developed countries. Advanced maternal age has been found to be associated with gestational diabetes, preeclampsia, placenta previa, caesarean section (CS), placental abruption, preterm delivery, low birth weight, intrauterine foetal death and an increased perinatal mortality.[12-20] The difference in obstetric and neonatal outcomes between teenagers and women at advanced age seemed to be lower risks for several unwanted and threatening outcomes in the teenage group; thus there were no obvious benefits concerning obstetric and neonatal outcomes at advanced maternal ages. The earlier published studies concerning the impact of maternal age on perinatal outcome differ in many aspects methodologically as well as in socio-demographic characteristics of the populations and health care systems. All these factors make interpretation of comparisons between data sets difficult.

Since the 1970 Sweden has actively developed strategies in social care, education and health care in order to counteract the negative consequences of adolescent parenthood and now has one of the lowest incidences of adolescent deliveries worldwide, 5.5/1000.[21] An analysis of perinatal outcomes in relation to maternal age in the Swedish population will provide important knowledge that may be used to further improve social, antenatal, obstetric and neonatal care for teenagers who become parents.

1  
2  
3  
4  
5  
6  
7  
8  
9  
10  
11  
12  
13  
14  
15  
16  
17  
18  
19  
20  
21  
22  
23  
24  
25  
26  
27  
28  
29  
30  
31  
32  
33  
34  
35  
36  
37  
38  
39  
40  
41  
42  
43  
44  
45  
46  
47  
48  
49  
50  
51  
52  
53  
54  
55  
56  
57  
58  
59  
60

The objective of the present study was to assess the impact of maternal age on obstetric and neonatal outcomes among singleton primiparous women in Sweden, with special emphasis on the adolescents and older mothers.

For peer review only

## MATERIALS AND METHODS

This study analyses the obstetric and neonatal outcomes of all singleton primiparous women prospectively registered in the Swedish Medical Birth Register (MBR) who gave births from January 1, 1992 through December 31, 2010. MBR has collected information about deliveries in Sweden since 1973. It is compulsory for every health care provider to report to the MBR. Medical and other data on almost all (99%) deliveries in Sweden are listed in the register, which also includes stillbirths. Starting with the first antenatal visit, usually in gestational week 10-12, the information is collected prospectively in standardized medical record forms completed at the maternity health care centers at antenatal care visits, in the delivery units, and at the paediatric examination of the new-born. The standardized medical records are identical throughout the country. A description and validation of the register content is available.[22-24]

The study population was grouped according to maternal age into seven subgroups: <17 years; 17-19 years; 20-24 years, 25-29 years, 30-34 years; 35-39 years and 40+ years. In the outcome analyses we selected the group of women age 25-29 years as reference group since “the average singleton primiparous woman” with respect to age in the time period of the study fell into this interval (Figure 1).

The list of available variables in MBR has been extended throughout the years that the register has been active. The obstetric and neonatal outcome data for the purpose of this study are those that have been available since 1992. From 1992 until June 2008 the MBR includes stillbirths after 28 weeks of gestation and from July 2008 until 2010 all stillbirths after 22 weeks of gestation are included. Each outcome studied was either marked in the MBR or registered according to the International Statistical Classification of Diseases and Related Health Problems (ICD). The obstetric outcome variables studied were gestational age, mode of delivery, mode of onset of labour, perineal laceration, preeclampsia, abruptio placentae, placenta previa, use of epidural analgesia and postpartum haemorrhage (PPH) exceeding 1000 ml. The foetal and neonatal outcomes evaluated were Apgar-score at 5 minutes, foetal distress (ICD code), aspiration of meconium (ICD code), shoulder dystocia (ICD code), and stillbirth.

1 Small-for-gestational age (SGA) infants were defined as those with birth weight more than 2 standard  
2 deviations (SD) below the mean birth weight for gestational age (sex and parity specific) according to a  
3 Swedish reference curve.[25] Large-for-gestational age (LGA) infants were those with a birth weight  
4 above 2 SD. All descriptive and background data were extracted from the MBR. The register  
5 information on these variables was obtained from the antenatal care center records.  
6  
7  
8  
9  
10  
11

12 The study was approved by the Regional Ethical Review Board in Linköping, Sweden (Dnr 2011/479-  
13 31. Approved January 25; 2012).  
14  
15  
16  
17

### 18 **Statistical analysis**

19 Data are presented as counts and per cent or mean and one SD. Logistic regression analyses were used  
20 for comparison of groups for categorical data. Data on a continuous scale were compared using  
21 analysis of covariance (ANCOVA). Multivariate logistic regression models were used in order to adjust  
22 comparisons for the confounding factors. Consequently adjusted odds ratios (OR) and 95% confidence  
23 intervals (CIs) are reported. Maternal weight and height (used for calculation of maternal Body Mass  
24 Index (BMI)) and smoking habits in early pregnancy (unknown, no smoking, smoking) and year of  
25 delivery were included as confounders in the adjusted analyses. Gestational age was added to the  
26 confounders in the analyses of CS, preeclampsia and birth weight.  
27  
28  
29  
30  
31  
32  
33  
34  
35  
36  
37  
38

39 The software STATISTICA 64 version 10 (StatSoft Inc. 2300 East 14<sup>th</sup> St. Tulsa, OK 74104 USA) was  
40 used to carry out the statistical analyses.  
41  
42  
43  
44  
45  
46  
47  
48  
49  
50  
51  
52  
53  
54  
55  
56  
57  
58  
59  
60



## RESULTS

In the period 1992 – 2010, 798,732 women were registered in the MBR as giving birth to their first child. Information on maternal age was missing in 58 cases leaving 798,674 women for the analyses.

The demographic, obstetric and neonatal data subdivided into maternal age groups are presented in Table 1 and 2.

For peer review only

Table 1. Demographic and descriptive obstetric characteristics of primiparous women with singleton births in the period 1992-2010.

| Characteristics             | Age groups             |       |                          |       |                           |       |                           |       |                           |       |                          |       |                        |       |
|-----------------------------|------------------------|-------|--------------------------|-------|---------------------------|-------|---------------------------|-------|---------------------------|-------|--------------------------|-------|------------------------|-------|
|                             | < 17 years<br>(n=2392) |       | 17-19 years<br>(n=29816) |       | 20-24 years<br>(n=185942) |       | 25-29 years<br>(n=300822) |       | 30-34 years<br>(n=205905) |       | 35-39 years<br>(n=63163) |       | 40+ years<br>(n=10634) |       |
| BMI (kg/m <sup>2</sup> ) †  | 22.8                   | 3.7   | 23.2                     | 4.1   | 23.8                      | 4.3   | 23.7                      | 4.0   | 23.8                      | 4.0   | 24.4                     | 4.1   | 24.7                   | 4.3   |
| Smoking †                   | 666                    | 27.8% | 9012                     | 30.2% | 31675                     | 17.0% | 24676                     | 8.2%  | 13971                     | 6.8%  | 5287                     | 8.4%  | 958                    | 9.0%  |
| Spontaneous onset labour    | 2055                   | 85.9% | 25853                    | 86.7% | 158879                    | 85.4% | 251340                    | 83.6% | 163876                    | 79.6% | 45330                    | 71.2% | 6261                   | 58.9% |
| Induced labour              | 184                    | 7.7%  | 2528                     | 8.5%  | 17433                     | 9.4%  | 30873                     | 10.3% | 25474                     | 12.4% | 10065                    | 15.9% | 2111                   | 19.9% |
| Normal vaginal delivery     | 2030                   | 84.9% | 25096                    | 84.2% | 147082                    | 79.1% | 219993                    | 73.1% | 135099                    | 65.6% | 35112                    | 55.6% | 4724                   | 44.4% |
| Forceps                     | 7                      | 0.3%  | 126                      | 0.4%  | 1143                      | 0.6%  | 2166                      | 0.7%  | 1515                      | 0.7%  | 575                      | 0.9%  | 84                     | 0.8%  |
| Vacuum extraction           | 143                    | 6.0%  | 2090                     | 7.0%  | 18011                     | 9.7%  | 36696                     | 12.2% | 29811                     | 14.5% | 10119                    | 16.0% | 1599                   | 15.0% |
| CS <sup>‡</sup>             | 213                    | 8.9%  | 2500                     | 8.4%  | 19747                     | 10.6% | 42044                     | 14.0% | 39534                     | 19.2% | 17355                    | 27.5% | 4226                   | 39.7% |
| CS elective 1999-2010 ‡     | 53                     | 2.2%  | 373                      | 1.3%  | 2828                      | 1.5%  | 6973                      | 2.3%  | 7656                      | 3.7%  | 3853                     | 6.1%  | 1132                   | 10.6% |
| CS acute 1999-2010 ‡        | 73                     | 3.1%  | 882                      | 3.0%  | 7092                      | 3.8%  | 16651                     | 5.5%  | 17953                     | 8.7%  | 7826                     | 12.4% | 1798                   | 16.9% |
| GA < 28 weeks               | 20                     | 0.8%  | 107                      | 0.4%  | 464                       | 0.2%  | 743                       | 0.2%  | 640                       | 0.3%  | 292                      | 0.5%  | 73                     | 0.7%  |
| GA < 32 weeks               | 40                     | 1.7%  | 308                      | 1.0%  | 1436                      | 0.8%  | 2415                      | 0.8%  | 2048                      | 1.0%  | 900                      | 1.4%  | 206                    | 1.9%  |
| GA < 37 weeks               | 213                    | 8.9%  | 1937                     | 6.5%  | 11030                     | 5.9%  | 18005                     | 5.6%  | 12727                     | 6.2%  | 4586                     | 7.3%  | 877                    | 8.2%  |
| GA 37 – 41 weeks            | 1990                   | 83.2% | 25811                    | 86.6% | 161043                    | 86.6% | 257320                    | 85.5% | 172621                    | 83.8% | 51494                    | 81.5% | 8786                   | 82.6% |
| GA ≥ 42 weeks               | 165                    | 6.9%  | 1967                     | 6.6%  | 13627                     | 7.3%  | 25278                     | 8.4%  | 20371                     | 9.9%  | 7018                     | 11.1% | 957                    | 9.0%  |
| Epidural analgesia*         | 903                    | 41.4% | 11569                    | 42.4% | 68332                     | 41.1% | 105266                    | 40.7% | 70691                     | 42.5% | 20151                    | 44.0% | 2743                   | 42.9% |
| Perineal laceration gr 1-2* | 311                    | 14.3% | 3982                     | 14.6% | 32602                     | 19.6% | 70452                     | 27.3% | 55163                     | 33.2% | 15477                    | 33.9% | 2116                   | 33.1% |
| Perineal laceration gr 3-4* | 23                     | 1.1%  | 272                      | 1.0%  | 3030                      | 1.8%  | 8202                      | 3.2%  | 6846                      | 4.1%  | 1856                     | 4.1%  | 222                    | 3.5%  |
| Preeclampsia                | 43                     | 1.8%  | 576                      | 1.9%  | 4317                      | 2.3%  | 6520                      | 2.2%  | 4265                      | 2.1%  | 1610                     | 2.5%  | 365                    | 3.4%  |
| Abruptio placentae          | 16                     | 0.7%  | 135                      | 0.5%  | 643                       | 0.3%  | 1171                      | 0.4%  | 955                       | 0.5%  | 390                      | 0.6%  | 87                     | 0.8%  |
| Placenta previa             | 2                      | 0.1%  | 16                       | 0.1%  | 159                       | 0.1%  | 505                       | 0.2%  | 612                       | 0.3%  | 375                      | 0.6%  | 89                     | 0.8%  |
| Bleeding > 1000 ml (VD)     | 65                     | 3.0%  | 667                      | 2.4%  | 5078                      | 3.1%  | 10931                     | 4.2%  | 9720                      | 5.9%  | 3173                     | 6.9%  | 485                    | 7.6%  |
| Bleeding > 1000 ml (CS)     | 2                      | 0.9%  | 28                       | 1.1%  | 252                       | 1.3%  | 541                       | 1.3%  | 578                       | 1.5%  | 237                      | 1.4%  | 80                     | 1.9%  |

Figures denote means and one standard deviation or counts and proportions.

BMI = body mass index; CS = caesarean section; GA = gestational age at delivery; VD = vaginal delivery

† Reported height, weight and smoking habits at first antenatal visit. ‡ All CS independent of status of performance – acute or elective.

\*Epidural analgesia and perineal lacerations in vaginal deliveries. †Caesarean section was subdivided into elective and acute CS from 1999.

Table 2: Descriptive neonatal outcome among primiparous women with singleton births in the period 1992-2010.

| Characteristics              | Age groups             |      |                          |      |                           |      |                           |      |                           |      |                          |      |                        |      |
|------------------------------|------------------------|------|--------------------------|------|---------------------------|------|---------------------------|------|---------------------------|------|--------------------------|------|------------------------|------|
|                              | < 17 years<br>(n=2392) |      | 17-19 years<br>(n=29816) |      | 20-24 years<br>(n=185942) |      | 25-29 years<br>(n=300822) |      | 30-34 years<br>(n=205905) |      | 35-39 years<br>(n=63163) |      | 40+ years<br>(n=10634) |      |
| Birth weight (gram)          | 3348                   | 592  | 3403                     | 565  | 3453                      | 554  | 3470                      | 555  | 3452                      | 572  | 3415                     | 612  | 3360                   | 640  |
| Foetal distress              | 8                      | 0.3% | 122                      | 0.4% | 932                       | 0.5% | 1621                      | 0.5% | 1070                      | 0.5% | 388                      | 0.6% | 56                     | 0.5% |
| Aspiration of meconium       | 0                      | 0%   | 30                       | 0.1% | 363                       | 0.2% | 649                       | 0.2% | 563                       | 0.3% | 193                      | 0.3% | 42                     | 0.4% |
| Shoulder dystocia            | 6                      | 0.3% | 78                       | 0.3% | 793                       | 0.4% | 1580                      | 0.5% | 1382                      | 0.7% | 489                      | 0.8% | 79                     | 0.7% |
| Stillbirth                   | 7                      | 0.3% | 102                      | 0.3% | 571                       | 0.3% | 893                       | 0.3% | 768                       | 0.4% | 347                      | 0.5% | 87                     | 0.8% |
| SGA                          | 91                     | 3.8% | 1136                     | 3.8% | 6016                      | 3.2% | 8831                      | 2.9% | 7216                      | 3.5% | 2962                     | 4.7% | 617                    | 5.8% |
| LGA                          | 47                     | 2.0% | 539                      | 1.8% | 3838                      | 2.1% | 5943                      | 2.0% | 3846                      | 1.9% | 1279                     | 2.0% | 224                    | 2.1% |
| Apgar score < 7 at 5 minutes | 43                     | 1.8% | 381                      | 1.3% | 2409                      | 1.3% | 4158                      | 1.4% | 3354                      | 1.6% | 1274                     | 2.0% | 240                    | 2.3% |

Figures denote means and one standard deviation or counts and proportions.

LGA = Large for gestational age; SGA = Small for gestational age

1  
2  
3  
4  
5  
6  
7  
8  
9  
10  
11  
12  
13  
14  
15  
16  
17  
18  
19  
20  
21  
22  
23  
24  
25  
26  
27  
28  
29  
30  
31  
32  
33  
34  
35  
36  
37  
38  
39  
40  
41  
42  
43  
44  
45  
46  
47  
48  
49  
50  
51  
52  
53  
54  
55  
56  
57  
58  
59  
60

The results of the multivariate analyses models of obstetric and neonatal outcomes are shown in Table 3 and 4, respectively.

For peer review only

Table 3. Mode of delivery and obstetric data among primiparous women with singleton births in the period 1992–2010 in relation to maternal age group. Maternal age 25–29 was set as reference.

| Characteristics                            | Age groups       |                  |                  |                  |                  |                  |
|--------------------------------------------|------------------|------------------|------------------|------------------|------------------|------------------|
|                                            | < 17 years       | 17–19 years      | 20–24 years      | 30 - 34 years    | 35 - 39 years    | 40+ years        |
| Spontaneous onset labour                   | 1.20 (1.05-1.37) | 1.26 (1.21-1.31) | 1.16 (1.14-1.18) | 0.78 (0.77-0.79) | 0.52 (0.51-0.54) | 0.30 (0.28-0.31) |
| Induced labour                             | 0.78 (0.66-0.93) | 0.86 (0.82-0.90) | 0.91 (0.90-0.93) | 1.19 (1.17-1.21) | 1.54 (1.50-1.58) | 1.97 (1.87-2.08) |
| Normal vaginal delivery                    | 2.04 (1.79-2.32) | 1.95 (1.88-2.02) | 1.39 (1.37-1.41) | 0.72 (0.71-0.73) | 0.48 (0.47-0.49) | 0.31 (0.30-0.32) |
| Forceps <sup>‡</sup>                       | 0.41 (0.18-0.92) | 0.48 (0.39-0.59) | 0.77 (0.71-0.84) | 1.20 (1.12-1.29) | 1.66 (1.49-1.84) | 1.75 (1.37-2.24) |
| Vacuum extraction <sup>‡</sup>             | 0.43 (0.36-0.52) | 0.50 (0.48-0.53) | 0.74 (0.72-0.75) | 1.29 (1.27-1.32) | 1.67 (1.63-1.72) | 1.92 (1.80-2.04) |
| CS, all                                    | 0.57 (0.48-0.67) | 0.55 (0.53-0.58) | 0.72 (0.71-0.74) | 1.44 (1.42-1.47) | 2.21 (2.16-2.26) | 3.78 (3.61-3.96) |
| CS elective 1999-2010 †                    | 0.83 (0.60-1.14) | 0.53 (0.47-0.60) | 0.68 (0.65-0.71) | 1.44 (1.39-1.49) | 2.25 (2.15-2.35) | 3.89 (3.61-4.20) |
| CS acute 1999-2010 †                       | 0.53 (0.40-0.69) | 0.56 (0.52-0.61) | 0.71 (0.69-0.73) | 1.44 (1.40-1.47) | 1.94 (1.88-2.00) | 2.68 (2.52-2.85) |
| GA < 28 weeks                              | 2.84 (1.59-5.06) | 1.25 (0.97-1.62) | 0.89 (0.77-1.02) | 1.17 (1.04-1.33) | 1.61 (1.40-1.90) | 2.48 (1.86-3.29) |
| GA < 32 weeks                              | 1.66 (1.10-2.51) | 1.20 (1.04-1.38) | 0.92 (0.85-0.99) | 1.24 (1.16-1.33) | 1.68 (1.53-1.84) | 2.25 (1.90-2.66) |
| GA < 37 weeks                              | 1.46 (1.24-1.72) | 1.03 (0.98-1.09) | 0.97 (0.95-1.00) | 1.02 (0.99-1.05) | 1.19 (1.15-1.24) | 1.37 (1.26-1.48) |
| GA 37 – 41 weeks                           | 0.88 (0.77-0.99) | 1.14 (1.09-1.18) | 1.12 (1.10-1.14) | 0.89 (0.86-0.89) | 0.76 (0.74-0.78) | 0.83 (0.79-0.88) |
| GA ≥42 weeks                               | 0.89 (0.75-1.06) | 0.79 (0.74-0.83) | 0.85 (0.83-0.87) | 1.20 (1.18-1.23) | 1.35 (1.31-1.39) | 1.06 (0.98-1.14) |
| Epidural analgesia <sup>‡</sup>            | 1.03 (0.93-1.13) | 1.07 (1.04-1.10) | 1.03 (1.01-1.04) | 1.03 (1.02-1.05) | 1.06 (1.04-1.09) | 0.98 (0.93-1.03) |
| Perineal laceration grade 1-2 <sup>‡</sup> | 0.44 (0.38-0.50) | 0.47 (0.45-0.49) | 0.68 (0.67-0.69) | 1.11 (1.10-1.13) | 1.08 (1.05-1.10) | 1.00 (0.94-1.07) |
| Perineal laceration grade 3-4 <sup>‡</sup> | 0.39 (0.25-0.60) | 0.37 (0.32-0.42) | 0.61 (0.58-0.64) | 1.16 (1.12-1.20) | 1.12 (1.05-1.18) | 0.88 (0.75-1.02) |
| Preeclampsia                               | 0.89 (0.62-1.27) | 0.93 (0.84-1.02) | 1.01 (0.96-1.05) | 1.07 (1.03-1.12) | 1.30 (1.22-1.39) | 1.83 (1.62-2.06) |
| Abruptio placentae                         | 1.76 (1.03-3.00) | 1.02 (0.83-1.26) | 0.83 (0.74-0.92) | 1.27 (1.16-1.40) | 1.71 (1.50-1.94) | 2.09 (1.62-2.71) |
| Placenta praevia                           | 0.57 (0.14-2.30) | 0.28 (0.16-0.50) | 0.52 (0.43-0.63) | 1.74 (1.53-2.00) | 3.47 (2.99-4.03) | 5.23 (4.08-6.70) |
| PPH > 1000 ml (VD)                         | 0.65 (0.48-0.88) | 0.64 (0.59-0.70) | 0.78 (0.75-0.81) | 1.27 (1.23-1.31) | 1.47 (1.40-1.53) | 1.48 (1.26-1.52) |
| PPH > 1000 ml (CS)                         | 0.52 (0.07-3.74) | 1.16 (0.77-1.93) | 1.09 (0.93-1.28) | 1.04 (0.91-1.18) | 0.95 (0.81-1.12) | 1.35 (1.05-1.73) |

CI = confidence intervals; CS = Caesarean section; GA = gestational age at delivery; N/A = not applicable; aOR = adjusted odds ratio; PPH = postpartum haemorrhage; VD = vaginal delivery.

† Adjusted for maternal BMI and smoking habits at first antenatal care visit and year of delivery. CS and preeclampsia also adjusted for gestational age.

‡ Caesarean section was subdivided into elective and acute CS from 1999.

‡ Forceps, vacuum extraction, epidural analgesia and perineal lacerations among vaginally delivered women.

Table 4. Neonatal outcome data from singleton primiparous women in the period 1992-2010 in relation to maternal age group.

| Characteristic               | Age groups       |                  |                  |                  |                  |                  |
|------------------------------|------------------|------------------|------------------|------------------|------------------|------------------|
|                              | < 17 years       | 17-19 years      | 20 - 24 years    | 30 -34 years     | 35 - 39 years    | 40+ years        |
|                              | aOR (95%CI)†     |
| Foetal distress              | 0.52 (0.22-1.26) | 0.63 (0.51-0.79) | 0.79 (0.72-0.91) | 1.23 (1.13-1.35) | 1.51 (1.33-1.72) | 1.60 (1.20-2.13) |
| Aspiration of meconium       | N/A              | 0.46 (0.31-0.70) | 0.93 (0.81-1.07) | 1.36 (1.20-1.54) | 1.48 (1.24-1.77) | 1.82 (1.28-2.58) |
| Shoulder dystocia‡           | 0.32(0.05-2.29)  | 0.74 (0.52-1.07) | 1.00 (0.86-1.16) | 1.13 (0.90-1.41) | 1.13 (0.91-1.41) | 1.27 (0.76-2.12) |
| Stillbirth                   | 0.58 (0.19-1.80) | 0.97 (0.75-1.25) | 0.98 (0.87-1.11) | 1.25 (1.12-1.39) | 1.72 (1.49-1.99) | 2.34 (1.80-3.03) |
| SGA                          | 1.00 (0.78-1.28) | 1.01 (0.94-1.09) | 1.00 (0.96-1.04) | 1.24 (1.20-1.28) | 1.65 (1.58-1.73) | 2.06 (1.87-2.26) |
| LGA                          | 1.08 (0.76-1.53) | 1.03 (0.94-1.14) | 1.05 (1.00-1.10) | 0.94 (0.90-0.98) | 0.97 (0.91-1.04) | 0.94 (0.81-1.09) |
| Apgar score < 7 at 5 minutes | 1.30 (0.91-1.86) | 0.92 (0.81-1.11) | 0.93 (0.88-0.98) | 1.18 (1.12-1.24) | 1.39 (1.29-1.49) | 1.51 (1.30-1.75) |

Figures denote odds ratios and 95% confidence intervals. Reference group: Maternal age 25-29 years.

LGA = Large for gestational age; N/A = not applicable; aOR = adjusted odds ratio; SGA = Small for gestational age

† Adjusted for maternal BMI and smoking habits at first antenatal care visit and year of delivery

‡ Shoulder dystocia among vaginal delivered women.

1 The average age of primiparous women increased substantially from 26.2 years in 1992 to 28.5 in  
2  
3 2004; hereafter it has stayed almost constant at that level.  
4

### 5 6 **Mode of delivery, obstetric and neonatal outcome of adolescents** 7

8  
9 Compared with the reference group of women age 25 -29 years the teenagers had a significantly higher  
10  
11 likelihood of having spontaneous onset of labour and of having a normal vaginal delivery. Teenagers  
12  
13 also demonstrated a significantly higher risk of giving birth prematurely. However, only the group of  
14  
15 teenagers younger than 17 years of age had an increased risk of giving birth very prematurely i.e.  
16  
17 before 28 weeks of gestational age, and the same group revealed a significantly higher risk of placental  
18  
19 abruption. In contrast with these observations the teenagers were delivered instrumentally and by CS  
20  
21 significantly less often, and the vaginal deliveries caused significantly fewer perineal lacerations (only  
22  
23 evaluated among women who delivered vaginally) and PPH > 1000 ml. Likewise the occurrence of  
24  
25 placenta previa was seen less often among teenagers whereas the occurrence of preeclampsia was equal  
26  
27 to that seen in adult women age 25-29 years.  
28  
29  
30  
31

32  
33 Concerning the foetal and neonatal outcomes for adolescents the infants were less likely to show foetal  
34  
35 distress and meconium aspiration in spite of a similar occurrence of Apgar score < 7 at 5 minutes. The  
36  
37 infants of the adolescents were not more prone to being stillborn or being SGA than the infants of  
38  
39 women age 25-29 years. The adjusted mean birth weight of infants of adolescents did not differ  
40  
41 significantly from that of women up to 29 years of age (Figure 2).  
42  
43  
44

### 45 **Mode of delivery, obstetric and neonatal outcome of women 20-24 years of age** 46

47  
48 The young women, 20 – 24 years of age, differed in some aspects from the reference group (25-29  
49  
50 years) as well as from the adolescents. They were less likely to be delivered prematurely and had a  
51  
52 lower frequency of placental abruption. Otherwise the obstetric and neonatal outcomes were similarly  
53  
54 favourable as those observed for the adolescents in comparison with the reference group.  
55  
56

### 57 **Mode of delivery, obstetric and neonatal outcome of women older than 29 years of age** 58 59 60

1 As shown in Table 3 compared with the reference group of women age 25-29 years almost all obstetric  
2  
3 outcome variables demonstrated a continuously progressive deterioration with increasing age. The  
4  
5 likelihood of normal vaginal deliveries decreased; induced labour, instrumental deliveries and CS  
6  
7 increased as well as prematurity including very premature deliveries. The risk of perineal damage  
8  
9 increased moderately whereas the risk of PPH > 1000 ml in vaginal deliveries was more pronounced.  
10  
11 The likelihood of the pregnancy complications preeclampsia, abruptio placenta and placenta previa was  
12  
13 also higher in the older age groups and progressed substantially with increasing age. Similarly, the  
14  
15 foetal and neonatal outcome was adversely progressively influenced by increasing maternal age. With  
16  
17 increasing maternal age over 30 years significantly more neonates were SGA, showed foetal distress,  
18  
19 had Apgar score < 7 at 5 minutes or meconium aspiration, or were stillborn. The mean birth weight of  
20  
21 the neonates also decreased significantly with increasing maternal age after the age of 30 (Figure 1).  
22  
23  
24  
25  
26  
27  
28  
29  
30  
31  
32  
33  
34  
35  
36  
37  
38  
39  
40  
41  
42  
43  
44  
45  
46  
47  
48  
49  
50  
51  
52  
53  
54  
55  
56  
57  
58  
59  
60



## DISCUSSION

This Swedish nation-wide population-based study with prospectively collected data concerning singleton primiparous women showed that the mode of delivery differed over the maternal age strata. Significantly more normal vaginal deliveries and fewer CS and instrumental vaginal deliveries were seen among the teenagers and among women aged 20-24 compared with women aged 25-29. The opposite was found among older women reaching a 4-fold increased risk for CS compared with women aged 20-24. The teenagers as well as women aged 20-24 were less prone to perineal lacerations and PPH exceeding 1000 ml. Prematurity (< 28 weeks of GA) was associated with very low maternal age (<17 years) among the adolescents although the increased risk was at the same level as among women aged 40 years and above, indicating a u-shaped risk curve. Adolescents were not afflicted more by preeclampsia than women aged 25-29 whereas the risk of preeclampsia increased significantly with advancing maternal age. The risk of placenta praevia increased dramatically with maternal age, actually a 500% increased risk was found after the age of 40 compared with women of 25-29 years of age. Stillbirth, SGA and low Apgar score were exclusively associated with advancing age over 30 years.

The strength of this study is that it deals with the outcomes in the population of an entire country where the antenatal care program is equally available to all pregnant women and is comprehensive. In Sweden pregnant women have completely cost free access to antenatal and obstetric facilities; poverty and malnutrition are practically non-existent and the vast majority of women attends the antenatal care program (99%) independent of socio-economic status and is delivered in obstetric units.[26] This context is valid for the whole study period. Another advantage is the large number of individuals available for evaluation, which makes it possible to divide the study population into subgroups with sufficient numbers in each stratum to provide high statistical power. A sufficient number of study subjects made it possible to evaluate three subgroups of young maternal age. Only primiparous women were included in order to avoid the confounding effects of factors associated with subsequent

1 deliveries. There are some limitations that should be considered. The external validity is reduced to  
2 facilities with similar socio-economic and demographic characteristics and health care systems with  
3 comparable standards. The drawback is obvious given the large size of the study and the numbers of  
4 health care units involved that the criteria for diagnosis (ICD codes) to define outcomes may not be  
5 uniform across the study population but the variation is most likely not related to maternal age. The  
6 MBR contain a large body of information concerning the mother and the child which made it possible  
7 to adjust the results for confounding factors. At the same time this is a limitation as only the data  
8 available in the register could be used for adjustments. We were not able to adjust for some putative  
9 confounders such as ethnicity, socio-economic status and medical conditions such as anemia in  
10 pregnancy. These factors may theoretically influence the outcomes.  
11  
12

13 The most prominent difference between finding in the present study and earlier studies <sup>8,9</sup> is that no  
14 increased risk for SGA was found among adolescents and young mothers 20-24 years of age compared  
15 with women age 25-29.[8-9] It must be kept in mind that the definition of SGA may differ between  
16 countries. In the United States and Latin America SGA is usually defined as birth weight below the 10<sup>th</sup>  
17 percentile compared with two SD in the Nordic countries.[3, 9] Adjusted risks for SGA among  
18 teenagers, recently presented from Finland, one of the Nordic countries, showed no increased risk  
19 among the youngest mothers.[6] In that study the control group was defined in the same way as in the  
20 present study. Differences concerning the risk for SGA could also be attributable to differences in  
21 socio-economic status. Chen et al. restricted their analysis to white married mothers with age-  
22 appropriate education level, adequate prenatal care, without smoking and alcohol use during pregnancy  
23 but found the increased risk for SGA to persist.[3] Several studies have shown low infant birth weight  
24 for adolescents as well as for mothers with advancing age.[18, 14, 27, 28] We failed to find such  
25 association among the adolescents, but in women with advancing age the difference in birth weight was  
26 statistically significant although the difference lacked clinical significance.  
27  
28  
29  
30  
31  
32  
33  
34  
35  
36  
37  
38  
39  
40  
41  
42  
43  
44  
45  
46  
47  
48  
49  
50  
51  
52  
53  
54  
55  
56  
57  
58  
59  
60

1 The finding of a preferable delivery outcome with lower CS rates and lower rates of instrumental  
2 delivery among teenagers compared with older women has been pinpointed to a lesser extent than  
3  
4 observed adverse outcomes. Earlier studies have shown relatively consistent results concerning a  
5  
6 decreased rate of CS in the adolescent group and a higher rate in women with advancing age.[6, 8, 9,  
7  
8 12-18] We were able to evaluate elective and emergency CS separately and the risks among teenagers  
9  
10 and mothers age 20-24 years were decreased for both types. This might indicate that the different risks  
11  
12 concerning CS among young and old mothers could not exclusively be explained by more CS on  
13  
14 maternal request among older mothers but may even be caused by biological factors. A low rate of  
15  
16 instrumental deliveries and CS among adolescents and high rate among older women has almost  
17  
18 unanimously been shown in several reports from developed as well as developing countries.[5, 7, 12-  
19  
20 18, 27-30] Whether this phenomenon depends on differences in handling the delivery, inherent or  
21  
22 cultural behavioural, domestic or social attitudes among delivery staff or biological factors has not been  
23  
24 investigated. It has previously been suggested that the biological factors could make the uterus and the  
25  
26 genital tract of young women more favourable for accomplishing a normal delivery.[31] Advancing  
27  
28 age is associated with endothelial dysfunction which theoretically may lead to impaired uterine, utero-  
29  
30 placental and vascular function.[32] The fact that adolescents in our study had a lower risk of induction  
31  
32 of labour, perineal damage, PPH, abruption (except for the very young women) and placenta previa and  
33  
34 women with advancing age had higher risks of all these outcomes including preeclampsia could  
35  
36 support a biological explanation. Concerning prematurity the age related risk curve was U shaped. This  
37  
38 may also support a biological aetiology; immaturity of the uterus in the very young women that  
39  
40 obstruct development of a term pregnancy and uterine dysfunction caused by ageing processes in  
41  
42 women with advancing age and consequently deliver prematurely in both situations. The foetal and  
43  
44 neonatal outcomes followed almost the same pattern, foetal distress, meconium aspiration, stillbirth,  
45  
46 SGA and low Apgar score were exclusively attributed to women older than 29.  
47  
48  
49  
50  
51  
52  
53  
54  
55  
56  
57  
58  
59  
60

1 In conclusion, in a country with a highly developed social and antenatal maternity health care security  
2 system giving cost free maternity and obstetric care to all pregnant women adolescents had a decreased  
3 risks for adverse obstetric and neonatal outcome compared with women aged 25-29. In the same social  
4 context childbirth at advanced maternal age was associated with a number of serious complications for  
5 both the mother and the child. For clinicians counselling young mothers it is of great importance to  
6 highlight the positive consequences that less obstetric complications and favorable neonatal outcomes  
7 are expected. There is also a need for more information about the consequences of childbearing at  
8 advanced maternal age and to develop surveillance programs in antenatal and obstetric care customized  
9 for older women.  
10  
11  
12  
13  
14  
15  
16  
17  
18  
19  
20  
21  
22  
23  
24  
25  
26  
27  
28  
29  
30  
31  
32  
33  
34  
35  
36  
37  
38  
39  
40  
41  
42  
43  
44  
45  
46  
47  
48  
49  
50  
51  
52  
53  
54  
55  
56  
57  
58  
59  
60

1  
2 **Funding:** The study was supported financially by grants from the County Council of Östergötland and  
3  
4 Linköping University.  
5  
6

7 **Disclosure of interest:** None of the authors has any conflict of interest to declare.  
8  
9

10 **Contribution of authorship:** The study was planned and conducted by PK, MB and RBT, Data was  
11  
12 analysed by all three. All authors contributed to the interpretation of the results, the elaboration of the  
13  
14 manuscript and approval of the final version.  
15  
16

17 **Checklist:** The manuscript conforms to the STROBE requirement.  
18  
19

20 **Data sharing statement:** Technical appendix, statistical code, and dataset available from the  
21  
22 corresponding author at Dryad repository, who will provide a permanent, citable and open access home  
23  
24 for the dataset.  
25  
26  
27  
28  
29  
30  
31  
32  
33  
34  
35  
36  
37  
38  
39  
40  
41  
42  
43  
44  
45  
46  
47  
48  
49  
50  
51  
52  
53  
54  
55  
56  
57  
58  
59  
60

**REFERENCE LIST**

1. Olausson PM, Cnattingius S, Goldenberg RL. Determinants of poor pregnancy outcomes among teenagers in Sweden. *Obstet Gynecol* 1997;89:451-457.
2. Olausson PO, Cnattingius S, Haglund B. Teenage pregnancies and risk of late fetal death and infant mortality. *Br J Obstet Gynaecol* 1999;106:116-21.
3. Chen XK, Wen SW, Fleming N, et al. Teenage pregnancy and adverse birth outcomes: a large population based retrospective cohort study. *Int J Epidemiol* 2007;36:368-73.
4. Gupta N, Kiran U, Bhal K. Teenage pregnancies: obstetric characteristics and outcome. *Eur J Obstet Gynecol Reprod Biol* 2008;137:165-71.
5. de Vienne CM, Creveuil C, Dreyfus M. Does young maternal age increase the risk of adverse obstetric, fetal and neonatal outcomes: a cohort study. *Eur J Obstet Gynecol Reprod Biol* 2009;147:151-6.
6. Leppälähti S, Gissler M, Mentula M, et al. Is teenage pregnancy an obstetric risk in a welfare society? A population-based study in Finland, from 2006 to 2011. *BMJ Open* 2013;19:3:e003225.
7. Lao TT, Ho LF. Obstetric outcome of teenage pregnancies. *Hum Reprod* 1998;13:3228-32.
8. Malabarey OT, Balayla J, Klam SL, et al. Pregnancies in young adolescent mothers: a population-based study on 37 million births. *J Pediatr Adolesc Gynecol* 2012;25:98-102.
9. Conde-Agudelo A, Belizán JM, Lammers C. Maternal-perinatal morbidity and mortality associated with adolescent pregnancy in Latin America: Cross-sectional study. *Am J Obstet Gynecol* 2005;192:342-9.
10. Mukhopadhyay P, Chaudhuri RN, Paul B. Hospital-based perinatal outcomes and complications in teenage pregnancy in India. *J Health Popul Nutr* 2010;28:494-500.
11. Ayuba II, Gani O. Outcome of teenage pregnancy in the niger delta of Nigeria. *Ethiop J Health Sci* 2012;22:45-50.

- 1 12. Jolly M, Sebire N, Harris J, et al. The risks associated with pregnancy in women aged 35 years or  
2 older. *Hum Reprod*. 2000;15:2433-7.
- 3  
4  
5  
6 13. Jacobsson B, Ladfors L, Milsom I. Advanced maternal age and adverse perinatal outcome. *Obstet*  
7  
8  
9  
10  
11 14. Cleary-Goldman J, Malone FD, Vidaver J, et al. Impact of maternal age on obstetric outcome.  
12  
13  
14  
15  
16 15. Joseph KS, Allen AC, Dodds L, et al. The perinatal effects of delayed child bearing. *Obstet*  
17  
18  
19  
20  
21 16. Luke B, Brown MB. Elevated risks of pregnancy complications and adverse outcomes with  
22  
23  
24  
25  
26 17. Delbaere I, Verstraelen H, Goetgeluk S, et al. Pregnancy outcome in primiparae of advanced  
27  
28  
29  
30  
31 18. Hsieh TT, Liou JD, Hsu JJ, et al. Advanced maternal age and adverse perinatal outcomes in an  
32  
33  
34  
35  
36 19. Matsuda Y, Kawamichi Y, Hayashi K, et al. Impact of maternal age on the prevalence of  
37  
38  
39  
40  
41 20. Biro MA, Davey MA, Carolan M, et al. Advanced maternal age and obstetric morbidity for  
42  
43  
44  
45  
46 21. Haagesen KM, ed. *Nordic Statistical Yearbook 2012*. Vol. 50. ISBN 978-92-893-2350-5, ISSN  
47  
48  
49  
50  
51 22. Källén B, Källén K, Olausson PO. The Swedish Medical Birth Register: a summary of content  
52  
53  
54  
55  
56  
57  
58  
59  
60 and quality. Research Report, Article no: 2003-112-3. Centre for Epidemiology, National Board  
of Health and Welfare Stockholm 2003. Available from:  
<http://www.socialstyrelsen.se/publikationer2003/2003-112-3> (Accessed May 2014.)

- 1 23. Cnattingius S, Ericson A, Gunnarskog J, et al. A quality study of a medical birth registry. *Scand J*  
2  
3  
4 *Soc Med* 1990;18:143–8.
- 5  
6 24. Axelsson O. The Swedish medical birth register. *Acta Obstet Gynecol Scand* 2003;82:491.
- 7  
8 25. Källén B. A birth weight for gestational age standard based on data in the Swedish Medical Birth  
9  
10 Registry, 1985-1989. *Eur J Epidemiol* 1995;11:601-6.
- 11  
12 26. Lindmark G, Cnattingius S. The scientific basis of antenatal care routines: Report from a state-of-  
13  
14 art conference. *Acta Obstet Gynecol Scand* 1991;70:105-9.
- 15  
16 27. Shrim A, Ates S, Mallozzi A, et al. Is young maternal age really a risk factor for adverse  
17  
18 pregnancy outcome in a Canadian tertiary referral hospital? *J Pediatr Adolesc Gynecol*  
19  
20 2011;24:218-22.
- 21  
22 28. Jivraj S, Nazzal Z, Davies P, et al. Obstetric outcome of teenage pregnancies from 2002 to 2008:  
23  
24 the Sheffield experience. *J Obstet Gynaecol* 2010;30:253-6.
- 25  
26 29. Beyer DA, Amari F, Diedrich K, et al. Teenage deliveries in Northern Germany: always a risk  
27  
28 factor for higher surgical delivery rates? *Arch Gynecol Obstet* 2011;284:535-8.
- 29  
30 30. Jolly MC, Sebire N, Harris J, et al. Obstetric risks of pregnancy in women less than 18 years old.  
31  
32 *Obstet Gynecol* 2000;96:962-6.
- 33  
34 31. Morris NM. The biological advantages and social disadvantages of teenage pregnancy. *Am J*  
35  
36 *Public Health*. 1981;71:796.
- 37  
38 32. Taddei S, Virdis A, Ghiadoni L, et al. Endothelium, aging, and hypertension. *Curr Hypertens*  
39  
40 *Rep*. 2006;8:84-9.
- 41  
42  
43  
44  
45  
46  
47  
48  
49  
50  
51  
52  
53  
54  
55  
56  
57  
58  
59  
60



## LEGENDS

Figure 1. Adjusted mean birth weight of neonates in singleton primiparous women in different maternal age groups. Birth weight adjusted for gestational age, maternal BMI and smoking habits, and year of delivery. Plots indicate means and bars 95% CI.

For peer review only

1  
2  
3  
4  
5  
6  
7  
8  
9  
10  
11  
12  
13  
14  
15  
16  
17  
18  
19  
20  
21  
22  
23  
24  
25  
26  
27  
28  
29  
30  
31  
32  
33  
34  
35  
36  
37  
38  
39  
40  
41  
42  
43  
44  
45  
46  
47  
48  
49  
50  
51  
52  
53  
54  
55  
56  
57  
58  
59  
60

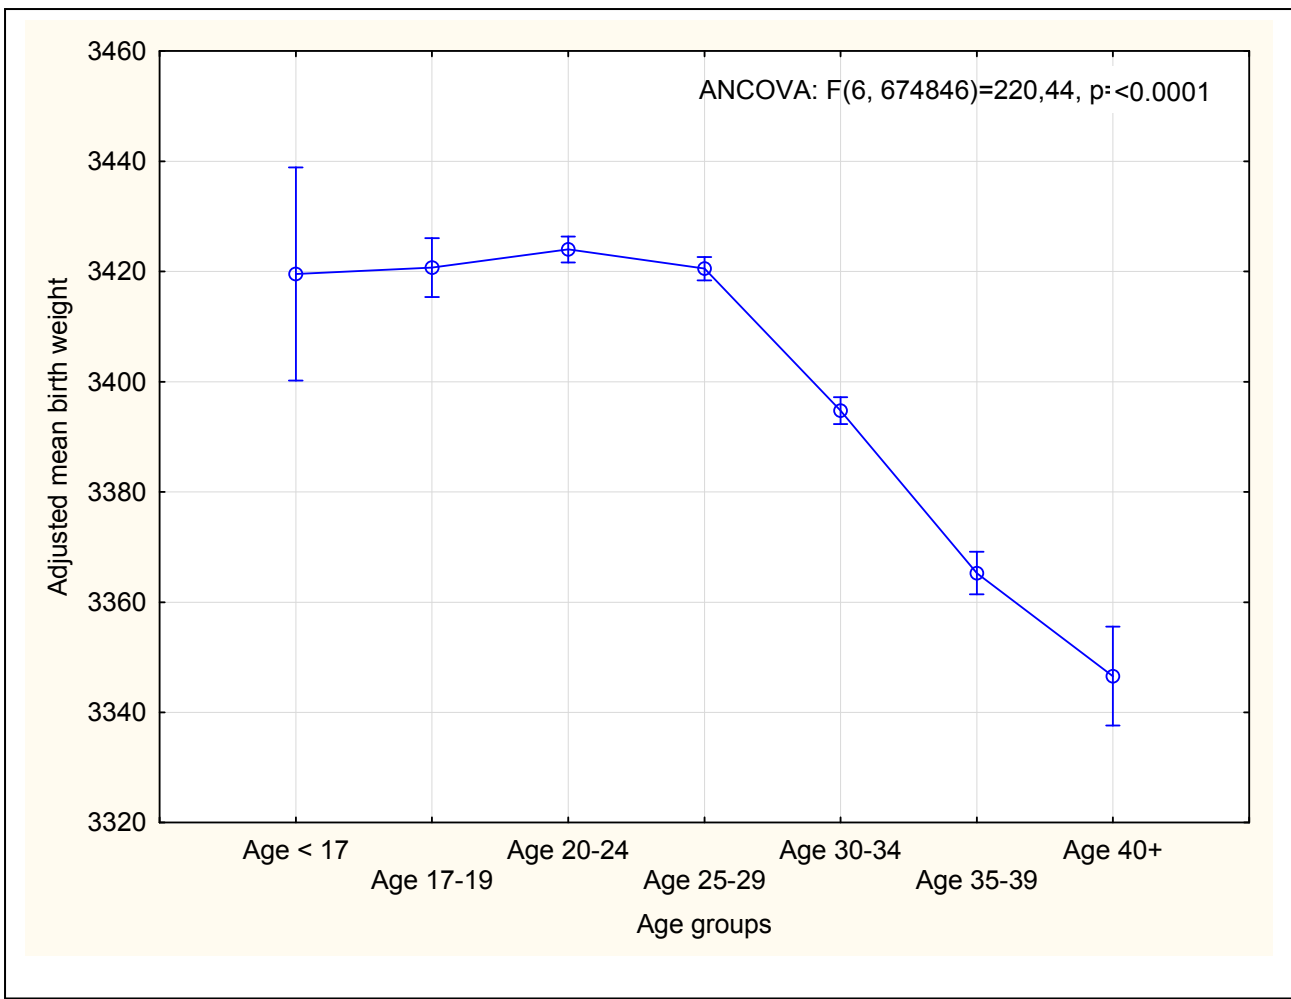

Figure 1.

## STROBE Statement—checklist of items that should be included in reports of observational studies

|                              | Item No   | Recommendation                                                                                                                                                                                                                                                                                                                                                                                                                                                                                                                                                                                                                                                                                         |
|------------------------------|-----------|--------------------------------------------------------------------------------------------------------------------------------------------------------------------------------------------------------------------------------------------------------------------------------------------------------------------------------------------------------------------------------------------------------------------------------------------------------------------------------------------------------------------------------------------------------------------------------------------------------------------------------------------------------------------------------------------------------|
| <b>Title and abstract</b>    | <b>1</b>  | (a) Indicate the study's design with a commonly used term in the title or the abstract. Done<br>(b) Provide in the abstract an informative and balanced summary of what was done and what was found Done                                                                                                                                                                                                                                                                                                                                                                                                                                                                                               |
| <b>Introduction</b>          |           |                                                                                                                                                                                                                                                                                                                                                                                                                                                                                                                                                                                                                                                                                                        |
| Background/rationale         | <b>2</b>  | Explain the scientific background and rationale for the investigation being reported. Done                                                                                                                                                                                                                                                                                                                                                                                                                                                                                                                                                                                                             |
| Objectives                   | <b>3</b>  | State specific objectives, including any prespecified hypotheses. Done                                                                                                                                                                                                                                                                                                                                                                                                                                                                                                                                                                                                                                 |
| <b>Methods</b>               |           |                                                                                                                                                                                                                                                                                                                                                                                                                                                                                                                                                                                                                                                                                                        |
| Study design                 | <b>4</b>  | Present key elements of study design early in the paper. Done                                                                                                                                                                                                                                                                                                                                                                                                                                                                                                                                                                                                                                          |
| Setting                      | <b>5</b>  | Describe the setting, locations, and relevant dates, including periods of recruitment, exposure, follow-up, and data collection. Done                                                                                                                                                                                                                                                                                                                                                                                                                                                                                                                                                                  |
| Participants                 | <b>6</b>  | (a) <i>Cohort study</i> —Give the eligibility criteria, and the sources and methods of selection of participants. Describe methods of follow-up. Done<br><i>Case-control study</i> —Give the eligibility criteria, and the sources and methods of case ascertainment and control selection. Give the rationale for the choice of cases and controls<br><i>Cross-sectional study</i> —Give the eligibility criteria, and the sources and methods of selection of participants<br>(b) <i>Cohort study</i> —For matched studies, give matching criteria and number of exposed and unexposed<br><i>Case-control study</i> —For matched studies, give matching criteria and the number of controls per case |
| Variables                    | <b>7</b>  | Clearly define all outcomes, exposures, predictors, potential confounders, and effect modifiers. Give diagnostic criteria, if applicable. Done                                                                                                                                                                                                                                                                                                                                                                                                                                                                                                                                                         |
| Data sources/<br>measurement | <b>8*</b> | For each variable of interest, give sources of data and details of methods of assessment (measurement). Describe comparability of assessment methods if there is more than one group. Done                                                                                                                                                                                                                                                                                                                                                                                                                                                                                                             |
| Bias                         | <b>9</b>  | Describe any efforts to address potential sources of bias. Done                                                                                                                                                                                                                                                                                                                                                                                                                                                                                                                                                                                                                                        |
| Study size                   | <b>10</b> | Explain how the study size was arrived at. All primiparous were included.                                                                                                                                                                                                                                                                                                                                                                                                                                                                                                                                                                                                                              |
| Quantitative variables       | <b>11</b> | Explain how quantitative variables were handled in the analyses. If applicable, describe which groupings were chosen and why. Done                                                                                                                                                                                                                                                                                                                                                                                                                                                                                                                                                                     |
| Statistical methods          | <b>12</b> | (a) Describe all statistical methods, including those used to control for confounding. Done<br>(b) Describe any methods used to examine subgroups and interactions<br>(c) Explain how missing data were addressed. Done<br>(d) <i>Cohort study</i> —If applicable, explain how loss to follow-up was addressed. Done<br><i>Case-control study</i> —If applicable, explain how matching of cases and controls was addressed<br><i>Cross-sectional study</i> —If applicable, describe analytical methods taking account of sampling strategy<br>(e) Describe any sensitivity analyses                                                                                                                    |

Continued on next page

**Results**

|                  |     |                                                                                                                                                                                                                                                                                                                                                                                                                                                               |
|------------------|-----|---------------------------------------------------------------------------------------------------------------------------------------------------------------------------------------------------------------------------------------------------------------------------------------------------------------------------------------------------------------------------------------------------------------------------------------------------------------|
| Participants     | 13* | (a) Report numbers of individuals at each stage of study—eg numbers potentially eligible, examined for eligibility, confirmed eligible, included in the study, completing follow-up, and analysed. Done<br>(b) Give reasons for non-participation at each stage<br>(c) Consider use of a flow diagram                                                                                                                                                         |
| Descriptive data | 14* | (a) Give characteristics of study participants (eg demographic, clinical, social) and information on exposures and potential confounders. Tables.<br>(b) Indicate number of participants with missing data for each variable of interest<br>(c) <i>Cohort study</i> —Summarise follow-up time (eg, average and total amount). Done                                                                                                                            |
| Outcome data     | 15* | <i>Cohort study</i> —Report numbers of outcome events or summary measures over time. Done<br><i>Case-control study</i> —Report numbers in each exposure category, or summary measures of exposure<br><i>Cross-sectional study</i> —Report numbers of outcome events or summary measures                                                                                                                                                                       |
| Main results     | 16  | (a) Give unadjusted estimates and, if applicable, confounder-adjusted estimates and their precision (eg, 95% confidence interval). Make clear which confounders were adjusted for and why they were included. Done only Adjusted Ors are given.<br>(b) Report category boundaries when continuous variables were categorized. Done<br>(c) If relevant, consider translating estimates of relative risk into absolute risk for a meaningful time period. Done. |
| Other analyses   | 17  | Report other analyses done—eg analyses of subgroups and interactions, and sensitivity analyses                                                                                                                                                                                                                                                                                                                                                                |

**Discussion**

|                  |    |                                                                                                                                                                                  |
|------------------|----|----------------------------------------------------------------------------------------------------------------------------------------------------------------------------------|
| Key results      | 18 | Summarise key results with reference to study objectives. Done                                                                                                                   |
| Limitations      | 19 | Discuss limitations of the study, taking into account sources of potential bias or imprecision. Discuss both direction and magnitude of any potential bias. done                 |
| Interpretation   | 20 | Give a cautious overall interpretation of results considering objectives, limitations, multiplicity of analyses, results from similar studies, and other relevant evidence. Done |
| Generalisability | 21 | Discuss the generalisability (external validity) of the study results. Done                                                                                                      |

**Other information**

|         |    |                                                                                                                                                                     |
|---------|----|---------------------------------------------------------------------------------------------------------------------------------------------------------------------|
| Funding | 22 | Give the source of funding and the role of the funders for the present study and, if applicable, for the original study on which the present article is based. Done |
|---------|----|---------------------------------------------------------------------------------------------------------------------------------------------------------------------|

\*Give information separately for cases and controls in case-control studies and, if applicable, for exposed and unexposed groups in cohort and cross-sectional studies.

**Note:** An Explanation and Elaboration article discusses each checklist item and gives methodological background and published examples of transparent reporting. The STROBE checklist is best used in conjunction with this article (freely available on the Web sites of PLoS Medicine at <http://www.plosmedicine.org/>, Annals of Internal Medicine at <http://www.annals.org/>, and Epidemiology at <http://www.epidem.com/>). Information on the STROBE Initiative is available at [www.strobe-statement.org](http://www.strobe-statement.org).

# BMJ Open

## Impact of maternal age on obstetric and neonatal outcome with emphasis on primiparous adolescents and older women-a Swedish Medical Birth Register Study.

|                                 |                                                                                                                                                                                                                                                                                                                                                  |
|---------------------------------|--------------------------------------------------------------------------------------------------------------------------------------------------------------------------------------------------------------------------------------------------------------------------------------------------------------------------------------------------|
| Journal:                        | <i>BMJ Open</i>                                                                                                                                                                                                                                                                                                                                  |
| Manuscript ID:                  | bmjopen-2014-005840.R1                                                                                                                                                                                                                                                                                                                           |
| Article Type:                   | Research                                                                                                                                                                                                                                                                                                                                         |
| Date Submitted by the Author:   | 31-Jul-2014                                                                                                                                                                                                                                                                                                                                      |
| Complete List of Authors:       | Blomberg, Marie; Department of Obstetrics and Gynaecology, Department of Clinical and Experimental Medicine<br>Birch Tyrberg, Rasmus; Department of Obstetrics and Gynaecology, Department of Clinical and Experimental Medicine<br>Kjølhede, Preben; Department of Obstetrics and Gynaecology, Department of Clinical and Experimental Medicine |
| <b>Primary Subject Heading</b>: | Obstetrics and gynaecology                                                                                                                                                                                                                                                                                                                       |
| Secondary Subject Heading:      | Epidemiology                                                                                                                                                                                                                                                                                                                                     |
| Keywords:                       | maternal age, obstetric outcome, neonatal outcome                                                                                                                                                                                                                                                                                                |
|                                 |                                                                                                                                                                                                                                                                                                                                                  |

SCHOLARONE™  
Manuscripts

1  
2 1  
3  
4 2 **Impact of maternal age on obstetric and neonatal outcome with**  
5  
6  
7 3 **emphasis on primiparous adolescents and older women-a Swedish**  
8  
9  
10 4 **Medical Birth Register Study.**  
11  
12  
13  
14 5

15  
16 6 Marie Blomberg MD, PhD, Rasmus Birch Tyrberg, BMs, and Preben Kjølhede, MD, PhD  
17  
18 7 Department of Obstetrics and Gynaecology and Department of Clinical and Experimental Medicine,  
19  
20  
21 8 Linköping University, Linköping, Sweden  
22  
23  
24 9

25  
26 10 Corresponding author:

27  
28 11 Marie Blomberg, MD, PhD

29  
30 12 Department of Obstetrics and Gynaecology,

31  
32 13 University Hospital

33  
34  
35 14 581 85 Linköping

36  
37 15 Sweden

38  
39 16 Phone +46 10 103 00 00

40  
41  
42 17 E-mail: marie.blomberg@lio.se  
43  
44

45 18 Keywords: maternal age, mode of delivery, neonatal outcome, obstetric outcome, adolescents  
46

47 19 Word count: 3201 words  
48  
49  
50 20  
51  
52  
53 21  
54  
55 22  
56  
57  
58 23  
59  
60

## 24 Abstract

25 **Objectives:** To evaluate the associations between maternal age and obstetric and neonatal outcomes in  
26 primiparous women with emphasis on teenagers and older women.

27 **Design:** A population-based cohort study.

28 **Setting:** The Swedish Medical Birth Register.

29 **Participants:** Primiparous women with singleton births from 1992 through 2010 (N=798,674) were  
30 divided into seven age groups: <17 years, 17-19 years, and additional five five-year classes. The  
31 reference group consisted of the women age 25-29 years.

32 **Primary outcome:** Obstetric and neonatal outcome.

33 **Results:** The teenager groups had significantly more vaginal births (OR 2.04 (1.79-2.32) and 1.95  
34 (1.88-2.02) for age <17 years and 17-19 years, respectively); fewer caesarean sections (OR 0.57 (0.48-  
35 0.67) and 0.55 (0.53-0.58)), and instrumental vaginal births (OR 0.43 (0.36-0.52) and 0.50 (0.48-0.53))  
36 compared with the reference group. The opposite was found among older women reaching a 4-fold  
37 increased risk for caesarean section. The teenagers showed no increased risk of adverse neonatal  
38 outcome but presented an increased risk of prematurity <32 weeks (OR 1.66 (1.10-2.51) and 1.20  
39 (1.04-1.38)). Women with advancing age ( $\geq 30$  years) revealed significantly increased risk of  
40 prematurity, perineal lacerations, preeclampsia, abruption, placenta previa, postpartum haemorrhage  
41 and unfavourable neonatal outcomes compared with the reference group.

42 **Conclusions:** For clinicians counselling young women it is of importance to highlight the obstetrically  
43 positive consequences that fewer maternal complications and favourable neonatal outcomes are  
44 expected. There is also a need to develop surveillance programs in antenatal and obstetric care for  
45 older women aiming for example to detect preeclampsia earlier or recommending prophylactic  
46 uterotonic treatment after birth to avoid extensive postpartum bleeding. Such interventions need to be  
47 evaluated in further studies.

1 49 **Article summary**

2  
3  
4 50 **Impact of maternal age on obstetric and neonatal outcome with emphasis on primiparous**  
5  
6 51 **adolescents and older women-a Swedish Medical Birth Register Study.**

7  
8  
9 52 Strengths and limitations of this study:

- 10  
11 53 • A strength of the present study is that it includes primiparous women of an entire country where  
12  
13 the antenatal care program is equally available to all pregnant women and is comprehensive.  
14 54  
15  
16 55 • Another advantage is the large number of individuals available for evaluation, which makes it  
17  
18 possible to divide the study population into subgroups with sufficient numbers in each stratum  
19 56  
20  
21 57 to provide high statistical power.  
22  
23 58 • A limitation is that the external validity is reduced to facilities with similar socio-economic and  
24  
25 demographic characteristics and health care systems with comparable standards.  
26 59  
27  
28 60 • The Swedish medical birth register contain a large body of information concerning the mother  
29  
30 and the child but only the available data in the register could be used for outcome evaluation  
31 61  
32  
33 62 and adjustments for putative confounders.  
34

35 63  
36  
37  
38  
39  
40  
41  
42  
43  
44  
45  
46  
47  
48  
49  
50  
51  
52  
53  
54  
55  
56  
57  
58  
59  
60



## 64 INTRODUCTION

65 There are a large number of studies evaluating obstetric and neonatal outcome over the full range of  
66 reproductive maternal ages, but especially with a focus on the youngest and the oldest mothers. Young  
67 mothers have been shown to be exposed to an increased risk of anaemia, low birth weight, foetal death,  
68 eclampsia and preterm birth although they at the same time were more likely to have a spontaneous  
69 normal vaginal birth and the risk of preeclampsia and post-partum haemorrhage were significantly  
70 decreased.[1-6] These studies evaluated outcomes in low-income countries. Many studies performed in  
71 low-income countries presented in recent years on the topic of teenage pregnancies have found similar  
72 obstetric and neonatal outcomes.[7-11]

73 Complications during pregnancy and birth at advanced maternal age (either defined as 35 years and  
74 older or 40 years or older) have also been evaluated in high-income countries. Advanced maternal age  
75 at birth has been found to be associated with gestational diabetes, preeclampsia, placenta previa,  
76 caesarean section (CS), placental abruption, preterm delivery, low birth weight, intrauterine foetal  
77 death and an increased perinatal mortality.[12-20] The difference in obstetric and neonatal outcomes  
78 between teenagers and women at advanced age seemed to be lower risks for several unwanted and  
79 threatening outcomes in the teenage group; thus there were no obvious advantages concerning obstetric  
80 and neonatal outcomes at advanced maternal ages. The earlier published studies concerning the impact  
81 of maternal age on perinatal outcome differ in many aspects methodologically as well as in the socio-  
82 demographic characteristics of the populations and health care systems. All these factors make  
83 interpretation of comparisons between data sets difficult.

84 Sweden has during several decades actively developed strategies in social care, education and health  
85 care in order to improve antenatal care and parenthood. In a Swedish state-of-the-art conference held in  
86 1990, the scientific basis of the routine antenatal program was critically evaluated. It was concluded  
87 that the scientific evidence to support the timing and contents of routine visits was unsatisfactory.[21]  
88 Consequently there is a constant need for evaluation both of single diagnostic procedures and

1 89 intervention and of outcomes. An analysis of perinatal outcomes in relation to maternal age in the  
2  
3  
4 90 Swedish population will provide important knowledge that may be used to further improve social,  
5  
6 91 antenatal, obstetric and neonatal care and reveals risk groups that in particular may need more attention  
7  
8 92 in the antenatal care.  
9

10  
11 93 The objective of the present study was to assess the impact of maternal age on obstetric and neonatal  
12  
13 94 outcomes among singleton primiparous women in Sweden, with special emphasis on the adolescents  
14  
15 95 and older mothers.  
16

17 96  
18  
19  
20  
21  
22  
23  
24  
25  
26  
27  
28  
29  
30  
31  
32  
33  
34  
35  
36  
37  
38  
39  
40  
41  
42  
43  
44  
45  
46  
47  
48  
49  
50  
51  
52  
53  
54  
55  
56  
57  
58  
59  
60

## 97 MATERIALS AND METHODS

98 This study analyses the obstetric and neonatal outcomes of all singleton primiparous women  
99 prospectively registered in the Swedish Medical Birth Register (MBR) who gave births from January 1,  
100 1992 through December 31, 2010. MBR has collected information about births in Sweden since 1973.  
101 It is compulsory for every health care provider to report to the MBR. Medical and other data on almost  
102 all (99%) births in Sweden are listed in the register, which also includes stillbirths. Starting with the  
103 first antenatal visit, usually in gestational week 10-12, the information is collected prospectively in  
104 standardized medical record forms completed at the maternity health care centers at antenatal care  
105 visits, in the birth units, and at the paediatric examination of the newborn. The standardized medical  
106 records are identical throughout the country. A description and validation of the register content is  
107 available.[22-24]

108 The study population was grouped according to maternal age into seven subgroups: <17 years; 17-19  
109 years; 20-24 years, 25-29 years, 30-34 years; 35-39 years and 40+ years. In the outcome analyses we  
110 selected the group of women age 25-29 years as reference group.

111 The list of available variables in MBR has been extended throughout the years that the register has  
112 been active. The obstetric and neonatal outcome data for the purpose of this study are those that have  
113 been available since 1992. From 1992 until June 2008 the MBR includes stillbirths after 28 weeks of  
114 gestation and from July 2008 until 2010 all stillbirths after 22 weeks of gestation are included. Each  
115 outcome studied was either marked in the MBR or registered according to the International Statistical  
116 Classification of Diseases and Related Health Problems (ICD). The obstetric outcome variables studied  
117 were gestational age, mode of delivery; normal vaginal birth (defined as neither instrumental vaginal  
118 delivery, nor CS), CS, instrumental vaginal delivery divided into forceps and vacuum extraction, mode  
119 of onset of labour, perineal laceration, preeclampsia, abruption placentae, placenta previa, use of  
120 epidural analgesia and postpartum haemorrhage (PPH) exceeding 1000 ml. The foetal and neonatal  
121 outcomes evaluated were Apgar-score at 5 minutes, foetal distress (ICD code P20.0, P20.1 and P20.9),

1 122 aspiration of meconium (ICD code P24.0), shoulder dystocia (ICD code O66.0), and stillbirth. Small-  
2  
3  
4 123 for-gestational age (SGA) newborns were defined as those with birth weight more than 2 standard  
5  
6 124 deviations (SD) below the mean birth weight for gestational age (sex and parity specific) according to a  
7  
8 125 Swedish reference curve.[25] Large-for-gestational age (LGA) newborns were those with a birth  
9  
10  
11 126 weight above 2 SD. All descriptive and background data were extracted from the MBR. The register  
12  
13 127 information on these variables was obtained from the antenatal care center records.  
14  
15  
16 128 The study was approved by the Regional Ethical Review Board in Linköping, Sweden (Dnr 2011/479-  
17  
18 129 31. Approved January 25; 2012).

### 21 130 **Statistical analysis**

22  
23 131 Data are presented as counts and per cent or mean and one SD. Logistic regression analyses were used  
24  
25 132 for comparison of groups for categorical data. Data on a continuous scale were compared using  
26  
27  
28 133 analysis of covariance (ANCOVA). Multivariate logistic regression models were used in order to adjust  
29  
30 134 comparisons for the confounding factors. Consequently crude and adjusted odds ratios (OR and aOR)  
31  
32 135 and 95% confidence intervals (CIs) are reported. Maternal weight and height (used for calculation of  
33  
34  
35 136 maternal Body Mass Index (BMI)) and smoking habits in early pregnancy (unknown, no smoking,  
36  
37 137 smoking) and year of birth were included as confounders in the adjusted analyses. Gestational age was  
38  
39  
40 138 added to the confounders in the analyses of CS, preeclampsia and birth weight.

41  
42 139 The OR for instrumental vaginal delivery was calculated among women with vaginal births only in  
43  
44 140 order to exclude women with an instrumental attempt to deliver followed by an emergency CS. The  
45  
46  
47 141 ORs of perineal lacerations were also estimated among women with vaginal births only. The  
48  
49 142 information concerning use of epidural analgesia was also restricted to vaginal births only. Epidural is  
50  
51  
52 143 an analgesic method that has been widely used in the delivery wards for vaginal births during the entire  
53  
54 144 time period. In contrast the use of epidural analgesia in CS has varied substantially over the time period  
55  
56 145 and has almost exclusively been used in elective CS. Our purpose was to evaluate the odds ratio for  
57  
58  
59  
60

1 146 epidural use over the maternal age strata and consequently we selected the mode of delivery that  
2  
3  
4 147 exhibited the least variation in the use of the analgesic method over the time period, i.e. vaginal births.  
5  
6 148 The software STATISTICA 64 version 10 (StatSoft Inc. 2300 East 14<sup>th</sup> St. Tulsa, OK 74104 USA) was  
7  
8 149 used to carry out the statistical analyses.  
9

10  
11 150

12  
13  
14  
15  
16  
17  
18  
19  
20  
21  
22  
23  
24  
25  
26  
27  
28  
29  
30  
31  
32  
33  
34  
35  
36  
37  
38  
39  
40  
41  
42  
43  
44  
45  
46  
47  
48  
49  
50  
51  
52  
53  
54  
55  
56  
57  
58  
59  
60

For peer review only

**RESULTS**

In the period 1992 – 2010, 798,732 women were registered in the MBR as giving birth to their first child. The annual number of primiparous women giving birth varied between 34060 and 49417. Information on maternal age was missing in 58 cases leaving 798,674 women for the analyses. The average age of primiparous women increased substantially from 26.2 years in 1992 to 28.5 in 2004; hereafter it has stayed almost constant at that level. The demographic, obstetric and neonatal data subdivided into maternal age groups are presented in Table 1 and 2.

Table 1. Descriptive data of primiparous women with singleton births in the period 1992-2010.

| Characteristics              | < 17 years<br>(n=2392) |       | 17-19 years<br>(n=29816) |       | 20-24 years<br>(n=185942) |       | 25-29 years<br>(n=300822) |       | 30-34 years<br>(n=205905) |       | 35-39 years<br>(n=63163) |       | 40+ years<br>(n=10634) |       |
|------------------------------|------------------------|-------|--------------------------|-------|---------------------------|-------|---------------------------|-------|---------------------------|-------|--------------------------|-------|------------------------|-------|
| <i>BMI<sup>†</sup> class</i> |                        |       |                          |       |                           |       |                           |       |                           |       |                          |       |                        |       |
| <18.5 kg/m <sup>2</sup>      | 135                    | 5.6%  | 1815                     | 6.1%  | 7650                      | 4.1%  | 7509                      | 2.5%  | 3847                      | 1.9%  | 918                      | 1.5%  | 133                    | 1.3%  |
| 18.5-24.9 kg/m <sup>2</sup>  | 1352                   | 56.5% | 16823                    | 56.4% | 104600                    | 56.3% | 180163                    | 59.9% | 122571                    | 59.5% | 34439                    | 54.5% | 5381                   | 50.1% |
| 25.0-29.9 kg/m <sup>2</sup>  | 315                    | 13.2% | 4687                     | 15.7% | 33961                     | 18.3% | 53896                     | 17.9% | 37234                     | 18.1% | 13310                    | 21.1% | 2442                   | 23.0% |
| 30.0-34.9 kg/m <sup>2</sup>  | 81                     | 3.4%  | 1327                     | 4.5%  | 10550                     | 5.7%  | 14401                     | 4.8%  | 9389                      | 4.6%  | 3575                     | 5.7%  | 683                    | 6.4%  |
| 35.0-39.9 kg/m <sup>2</sup>  | 11                     | 0.5%  | 337                      | 1.1%  | 3013                      | 1.6%  | 4070                      | 1.4%  | 2724                      | 1.3%  | 1024                     | 1.6%  | 188                    | 1.8%  |
| ≥ 40.0 kg/m <sup>2</sup>     | 4                      | 0.2%  | 87                       | 0.3%  | 904                       | 0.5%  | 1312                      | 0.4%  | 944                       | 0.5%  | 342                      | 0.5%  | 68                     | 0.6%  |
| Missing data                 | 494                    | 20.7% | 4740                     | 15.9% | 25264                     | 13.6% | 39471                     | 13.1% | 29196                     | 14.2% | 9555                     | 15.1% | 1739                   | 16.4% |
| <i>Smoking<sup>†</sup></i>   |                        |       |                          |       |                           |       |                           |       |                           |       |                          |       |                        |       |
| Yes                          | 666                    | 27.8% | 9012                     | 30.2% | 31675                     | 17.0% | 24676                     | 8.2%  | 13971                     | 6.8%  | 5287                     | 8.4%  | 958                    | 9.0%  |
| No                           | 1542                   | 64.5% | 19154                    | 64.3% | 145695                    | 78.4% | 261348                    | 86.9% | 178792                    | 86.8% | 53416                    | 84.6% | 8883                   | 83.5% |
| Missing data                 | 184                    | 7.7%  | 1650                     | 5.5%  | 8572                      | 4.6%  | 14798                     | 4.9%  | 13142                     | 6.4%  | 4460                     | 7.0%  | 793                    | 7.5%  |
| <i>Gestational age</i>       |                        |       |                          |       |                           |       |                           |       |                           |       |                          |       |                        |       |
| Information available        | 2368                   | 99.0% | 29715                    | 99.7% | 185700                    | 99.9% | 300603                    | 99.9% | 205719                    | 99.9% | 63098                    | 99.9% | 10620                  | 99.9% |
| Missing data                 | 24                     | 1.0%  | 101                      | 0.3%  | 242                       | 0.1%  | 219                       | 0.1%  | 186                       | 0.1%  | 65                       | 0.1%  | 14                     | 0.1%  |

Figures denote counts and proportions.

BMI = body mass index.

<sup>†</sup> Reported height, weight and smoking habits at first antenatal visit.

Table 2. Obstetric and neonatal outcome characteristics of primiparous women with singleton births in the period 1992-2010.

| Characteristics                                              | Age groups             |       |                          |       |                           |       |                           |       |                           |       |                          |       |                        |       |
|--------------------------------------------------------------|------------------------|-------|--------------------------|-------|---------------------------|-------|---------------------------|-------|---------------------------|-------|--------------------------|-------|------------------------|-------|
|                                                              | < 17 years<br>(n=2392) |       | 17-19 years<br>(n=29816) |       | 20-24 years<br>(n=185942) |       | 25-29 years<br>(n=300822) |       | 30-34 years<br>(n=205905) |       | 35-39 years<br>(n=63163) |       | 40+ years<br>(n=10634) |       |
| <i>Labour:</i>                                               |                        |       |                          |       |                           |       |                           |       |                           |       |                          |       |                        |       |
| Spontaneous onset labour                                     | 2055                   | 85.9% | 25853                    | 86.7% | 158879                    | 85.4% | 251340                    | 83.6% | 163876                    | 79.6% | 45330                    | 71.2% | 6261                   | 58.9% |
| Induced labour                                               | 184                    | 7.7%  | 2528                     | 8.5%  | 17433                     | 9.4%  | 30873                     | 10.3% | 25474                     | 12.4% | 10065                    | 15.9% | 2111                   | 19.9% |
| <i>Mode of delivery:</i>                                     |                        |       |                          |       |                           |       |                           |       |                           |       |                          |       |                        |       |
| Normal vaginal birth                                         | 2030                   | 84.9% | 25096                    | 84.2% | 147082                    | 79.1% | 219993                    | 73.1% | 135099                    | 65.6% | 35112                    | 55.6% | 4724                   | 44.4% |
| Forceps                                                      | 7                      | 0.3%  | 126                      | 0.4%  | 1143                      | 0.6%  | 2166                      | 0.7%  | 1515                      | 0.7%  | 575                      | 0.9%  | 84                     | 0.8%  |
| Vacuum extraction                                            | 143                    | 6.0%  | 2090                     | 7.0%  | 18011                     | 9.7%  | 36696                     | 12.2% | 29811                     | 14.5% | 10119                    | 16.0% | 1599                   | 15.0% |
| CS <sup>‡</sup>                                              | 213                    | 8.9%  | 2500                     | 8.4%  | 19747                     | 10.6% | 42044                     | 14.0% | 39534                     | 19.2% | 17355                    | 27.5% | 4226                   | 39.7% |
| CS elective 1999-2010 †                                      | 53                     | 2.2%  | 373                      | 1.3%  | 2828                      | 1.5%  | 6973                      | 2.3%  | 7656                      | 3.7%  | 3853                     | 6.1%  | 1132                   | 10.6% |
| CS acute 1999-2010 †                                         | 73                     | 3.1%  | 882                      | 3.0%  | 7092                      | 3.8%  | 16651                     | 5.5%  | 17953                     | 8.7%  | 7826                     | 12.4% | 1798                   | 16.9% |
| <i>Gestational age:</i>                                      |                        |       |                          |       |                           |       |                           |       |                           |       |                          |       |                        |       |
| GA < 28 weeks                                                | 20                     | 0.8%  | 107                      | 0.4%  | 464                       | 0.2%  | 743                       | 0.2%  | 640                       | 0.3%  | 292                      | 0.5%  | 73                     | 0.7%  |
| GA < 32 weeks                                                | 40                     | 1.7%  | 308                      | 1.0%  | 1436                      | 0.8%  | 2415                      | 0.8%  | 2048                      | 1.0%  | 900                      | 1.4%  | 206                    | 1.9%  |
| GA < 37 weeks                                                | 213                    | 8.9%  | 1937                     | 6.5%  | 11030                     | 5.9%  | 18005                     | 5.6%  | 12727                     | 6.2%  | 4586                     | 7.3%  | 877                    | 8.2%  |
| GA 37 – 41 weeks                                             | 1990                   | 83.2% | 25811                    | 86.6% | 161043                    | 86.6% | 257320                    | 85.5% | 172621                    | 83.8% | 51494                    | 81.5% | 8786                   | 82.6% |
| GA ≥ 42 weeks                                                | 165                    | 6.9%  | 1967                     | 6.6%  | 13627                     | 7.3%  | 25278                     | 8.4%  | 20371                     | 9.9%  | 7018                     | 11.1% | 957                    | 9.0%  |
| <i>Maternal complications and use of epidural analgesia:</i> |                        |       |                          |       |                           |       |                           |       |                           |       |                          |       |                        |       |
| Perineal laceration gr 1-2*                                  | 311                    | 14.3% | 3982                     | 14.6% | 32602                     | 19.6% | 70452                     | 27.3% | 55163                     | 33.2% | 15477                    | 33.9% | 2116                   | 33.1% |
| Perineal laceration gr 3-4*                                  | 23                     | 1.1%  | 272                      | 1.0%  | 3030                      | 1.8%  | 8202                      | 3.2%  | 6846                      | 4.1%  | 1856                     | 4.1%  | 222                    | 3.5%  |
| Preeclampsia                                                 | 43                     | 1.8%  | 576                      | 1.9%  | 4317                      | 2.3%  | 6520                      | 2.2%  | 4265                      | 2.1%  | 1610                     | 2.5%  | 365                    | 3.4%  |
| Abruptio placentae                                           | 16                     | 0.7%  | 135                      | 0.5%  | 643                       | 0.3%  | 1171                      | 0.4%  | 955                       | 0.5%  | 390                      | 0.6%  | 87                     | 0.8%  |
| Placenta previa                                              | 2                      | 0.1%  | 16                       | 0.1%  | 159                       | 0.1%  | 505                       | 0.2%  | 612                       | 0.3%  | 375                      | 0.6%  | 89                     | 0.8%  |
| PPH > 1000 ml (VB)                                           | 65                     | 3.0%  | 667                      | 2.4%  | 5078                      | 3.1%  | 10931                     | 4.2%  | 9720                      | 5.9%  | 3173                     | 6.9%  | 485                    | 7.6%  |
| PPH > 1000 ml (CS)                                           | 2                      | 0.9%  | 28                       | 1.1%  | 252                       | 1.3%  | 541                       | 1.3%  | 578                       | 1.5%  | 237                      | 1.4%  | 80                     | 1.9%  |
| Epidural analgesia*                                          | 903                    | 41.4% | 11569                    | 42.4% | 68332                     | 41.1% | 105266                    | 40.7% | 70691                     | 42.5% | 20151                    | 44.0% | 2743                   | 42.9% |



Table 2 continued. Obstetric and neonatal outcome characteristics of primiparous women with singleton births in the period 1992-2010.

| Characteristics        | Age groups             |      |                          |      |                           |      |                           |      |                           |      |                          |      |                        |      |
|------------------------|------------------------|------|--------------------------|------|---------------------------|------|---------------------------|------|---------------------------|------|--------------------------|------|------------------------|------|
|                        | < 17 years<br>(n=2392) |      | 17-19 years<br>(n=29816) |      | 20-24 years<br>(n=185942) |      | 25-29 years<br>(n=300822) |      | 30-34 years<br>(n=205905) |      | 35-39 years<br>(n=63163) |      | 40+ years<br>(n=10634) |      |
| <i>Neonatal</i>        |                        |      |                          |      |                           |      |                           |      |                           |      |                          |      |                        |      |
| Foetal distress        | 8                      | 0.3% | 122                      | 0.4% | 932                       | 0.5% | 1621                      | 0.5% | 1070                      | 0.5% | 388                      | 0.6% | 56                     | 0.5% |
| Aspiration of meconium | 0                      | 0%   | 30                       | 0.1% | 363                       | 0.2% | 649                       | 0.2% | 563                       | 0.3% | 193                      | 0.3% | 42                     | 0.4% |
| Shoulder dystocia      | 6                      | 0.3% | 78                       | 0.3% | 793                       | 0.4% | 1580                      | 0.5% | 1382                      | 0.7% | 489                      | 0.8% | 79                     | 0.7% |
| Stillbirth             | 7                      | 0.3% | 102                      | 0.3% | 571                       | 0.3% | 893                       | 0.3% | 768                       | 0.4% | 347                      | 0.5% | 87                     | 0.8% |
| SGA                    | 91                     | 3.8% | 1136                     | 3.8% | 6016                      | 3.2% | 8831                      | 2.9% | 7216                      | 3.5% | 2962                     | 4.7% | 617                    | 5.8% |
| LGA                    | 47                     | 2.0% | 539                      | 1.8% | 3838                      | 2.1% | 5943                      | 2.0% | 3846                      | 1.9% | 1279                     | 2.0% | 224                    | 2.1% |
| Apgar score < 7 at 5   | 43                     | 1.8% | 381                      | 1.3% | 2409                      | 1.3% | 4158                      | 1.4% | 3354                      | 1.6% | 1274                     | 2.0% | 240                    | 2.3% |
| Birth weight (gram)    | 3348                   | 592  | 3403                     | 565  | 3453                      | 554  | 3470                      | 555  | 3452                      | 572  | 3415                     | 612  | 3360                   | 640  |

Figures denote counts and proportions or mean and one standard deviation.

BMI = body mass index; CS = caesarean section; GA = gestational age at birth; LGA = large for gestational age; PPH = postpartum haemorrhage; SGA = small for gestational age; VB = vaginal birth

‡All CS independent of status of performance – acute or elective. †Caesarean section was subdivided into elective and acute CS from 1999.

\*Epidural analgesia and perineal lacerations in vaginal births only.

1  
2  
3  
4  
5  
6  
7  
8  
9  
10  
11  
12  
13  
14  
15  
16  
17  
18  
19  
20  
21  
22  
23  
24  
25  
26  
27  
28  
29  
30  
31  
32  
33  
34  
35  
36  
37  
38  
39  
40  
41  
42  
43  
44  
45  
46  
47  
48  
49  
50  
51  
52  
53  
54  
55  
56  
57  
58  
59  
60

The crude odds rates and the results of the multivariate analyses models of obstetric and neonatal outcomes are shown in Table 3 and 4, respectively.

For peer review only

Table 3. Obstetric outcome data in singleton primiparous women in the period 1992-2010 in relation to maternal age group.

| Characteristics          | Crude OR (95%CI) | aOR (95%CI)†     | Crude OR (95%CI) | aOR (95%CI)†     | Crude OR (95%CI) | aOR (95%CI)†     |
|--------------------------|------------------|------------------|------------------|------------------|------------------|------------------|
| <i>Labour</i>            | < 17 years       |                  | 17-19 years      |                  | 20-24 years      |                  |
| Spontaneous onset labour | 1.20 (1.07-1.35) | 1.20 (1.05-1.37) | 1.28 (1.24-1.33) | 1.26 (1.21-1.31) | 1.16 (1.14-1.17) | 1.16 (1.14-1.18) |
| Induced labour           | 0.73 (0.63-0.85) | 0.78 (0.66-0.93) | 0.81 (0.78-0.85) | 0.86 (0.82-0.90) | 0.90 (0.89-0.92) | 0.91 (0.90-0.93) |
|                          | 30 - 34 years    |                  | 35 - 39 years    |                  | 40+ years        |                  |
| Spontaneous onset labour | 0.77 (0.76-0.78) | 0.78 (0.77-0.79) | 0.50 (0.49-0.51) | 0.52 (0.51-0.54) | 0.29 (0.26-0.30) | 0.30 (0.28-0.31) |
| Induced labour           | 1.23 (1.21-1.26) | 1.19 (1.17-1.21) | 1.66 (1.62-1.70) | 1.54 (1.50-1.58) | 2.17 (2.06-2.27) | 1.97 (1.87-2.08) |
| <i>Mode of delivery</i>  | < 17 years       |                  | 17-19 years      |                  | 20-24 years      |                  |
| Normal vaginal birth     | 2.05 (1.84-2.30) | 2.04 (1.79-2.32) | 1.95 (1.89-2.02) | 1.95 (1.88-2.02) | 1.39 (1.37-1.41) | 1.39 (1.37-1.41) |
| Forceps*                 | 0.38 (0.18-0.81) | 0.41 (0.18-0.92) | 0.55 (0.46-0.64) | 0.48 (0.39-0.59) | 0.82 (0.76-0.88) | 0.77 (0.71-0.84) |
| Vacuum extraction‡       | 0.42 (0.36-0.51) | 0.43 (0.36-0.52) | 0.50 (0.48-0.53) | 0.50 (0.48-0.53) | 0.74 (0.72-0.75) | 0.74 (0.72-0.75) |
| CS. all                  | 0.60 (0.52-0.69) | 0.57 (0.48-0.67) | 0.56 (0.54-0.69) | 0.55 (0.53-0.58) | 0.73 (0.72-0.74) | 0.72 (0.71-0.74) |
| CS elective 1999-2010 †  | 0.95 (0.73-1.25) | 0.83 (0.60-1.14) | 0.53 (0.48-0.59) | 0.53 (0.47-0.60) | 0.65 (0.62-0.68) | 0.68 (0.65-0.71) |
| CS acute 1999-2010 †     | 0.54 (0.43-0.68) | 0.53 (0.40-0.69) | 0.52 (0.49-0.56) | 0.56 (0.52-0.61) | 0.68 (0.66-0.70) | 0.71 (0.69-0.73) |
|                          | 30 - 34 years    |                  | 35 - 39 years    |                  | 40+ years        |                  |
| Normal vaginal delivery  | 0.70 (0.69-0.71) | 0.72 (0.71-0.73) | 0.46 (0.45-0.47) | 0.48 (0.47-0.49) | 0.29 (0.28-0.31) | 0.31 (0.30-0.32) |
| Forceps*                 | 1.08 (1.01-1.15) | 1.20 (1.12-1.29) | 1.48 (1.35-1.63) | 1.66 (1.49-1.84) | 1.58 (1.27-1.98) | 1.75 (1.37-2.24) |
| Vacuum extraction‡       | 1.32 (1.30-1.34) | 1.29 (1.27-1.32) | 1.72 (1.67-1.76) | 1.67 (1.63-1.72) | 2.01 (1.90-2.13) | 1.92 (1.80-2.04) |
| CS. all                  | 1.46 (1.44-1.49) | 1.44 (1.42-1.47) | 2.34 (2.29-2.38) | 2.21 (2.16-2.26) | 4.07 (3.91-4.23) | 3.78 (3.61-3.96) |
| CS elective 1999-2010 †  | 1.63 (1.57-1.68) | 1.44 (1.39-1.49) | 2.74 (2.63-2.85) | 2.25 (2.15-2.35) | 5.03 (4.70-5.36) | 3.89 (3.61-4.20) |
| CS acute 1999-2010 †     | 1.63 (1.59-1.67) | 1.44 (1.40-1.47) | 2.41 (2.35-2.48) | 1.94 (1.88-2.00) | 3.47 (3.29-3.66) | 2.68 (2.52-2.85) |
| <i>Gestational age</i>   | < 17 years       |                  | 17-19 years      |                  | 20-24 years      |                  |
| GA < 28 weeks            | 3.44 (2.20-5.37) | 2.84 (1.59-5.06) | 1.46 (1.19-1.79) | 1.25 (0.97-1.62) | 1.01 (0.90-1.14) | 0.89 (0.77-1.02) |
| GA < 32 weeks            | 2.12 (1.55-2.91) | 1.66 (1.10-2.51) | 1.29 (1.15-1.46) | 1.20 (1.04-1.38) | 0.96 (0.90-1.03) | 0.92 (0.85-0.99) |
| GA < 37 weeks            | 1.55 (1.34-1.79) | 1.46 (1.24-1.72) | 1.09 (1.04-1.15) | 1.03 (0.98-1.09) | 0.99 (0.97-1.02) | 0.97 (0.95-1.00) |
| GA 37 – 41 weeks         | 0.89 (0.79-0.99) | 0.88 (0.77-0.99) | 1.11 (1.07-1.15) | 1.14 (1.09-1.18) | 1.10 (2.08-1.12) | 1.12 (1.10-1.14) |
| GA ≥ 42 weeks            | 0.82 (0.70-0.96) | 0.89 (0.75-1.06) | 0.77 (0.74-0.81) | 0.79 (0.74-0.83) | 0.86 (0.84-0.88) | 0.85 (0.83-0.87) |
|                          | 30 - 34 years    |                  | 35 - 39 years    |                  | 40+ years        |                  |
| GA < 28 weeks            | 1.26 (1.13-1.40) | 1.17 (1.04-1.33) | 1.88 (1.64-2.15) | 1.61 (1.40-1.90) | 2.79 (2.19-3.56) | 2.48 (1.86-3.29) |
| GA < 32 weeks            | 1.24 (1.17-1.32) | 1.24 (1.16-1.33) | 1.79 (1.65-1.93) | 1.68 (1.53-1.84) | 2.44 (2.12-2.82) | 2.25 (1.90-2.66) |
| GA < 37 weeks            | 1.04 (1.01-1.06) | 1.02 (0.99-1.05) | 1.23 (1.19-1.27) | 1.19 (1.15-1.24) | 1.41 (1.32-1.52) | 1.37 (1.26-1.48) |
| GA 37 – 41 weeks         | 0.88 (0.86-0.89) | 0.89 (0.86-0.89) | 0.75 (0.73-0.76) | 0.76 (0.74-0.78) | 0.81 (0.77-0.85) | 0.83 (0.79-0.88) |
| GA ≥ 42 weeks            | 1.20 (1.17-1.22) | 1.20 (1.18-1.23) | 1.36 (1.33-1.40) | 1.35 (1.31-1.39) | 1.08 (1.01-1.15) | 1.06 (0.98-1.14) |

Table 3 continued. Obstetric outcome data in singleton primiparous women in the period 1992-2010 in relation to maternal age group.

| Characteristics                                              | Crude OR (95%CI) | aOR (95%CI)†     | Crude OR (95%CI) | aOR (95%CI)†     | Crude OR (95%CI) | aOR (95%CI)†     |
|--------------------------------------------------------------|------------------|------------------|------------------|------------------|------------------|------------------|
| <i>Maternal complications and use of epidural analgesia:</i> |                  |                  |                  |                  |                  |                  |
|                                                              | < 17 years       |                  | 17-19 years      |                  | 20-24 years      |                  |
| Perineal laceration grade 1-2‡                               | 0.44 (0.39-0.50) | 0.44 (0.38-0.50) | 0.46 (0.44-0.47) | 0.47 (0.45-0.49) | 0.65 (0.64-0.66) | 0.68 (0.67-0.69) |
| Perineal laceration grade 3-4‡                               | 0.33 (0.22-0.49) | 0.39 (0.25-0.60) | 0.31 (0.25-0.37) | 0.37 (0.32-0.42) | 0.57 (0.54-0.59) | 0.61 (0.58-0.64) |
| Preeclampsia                                                 | 0.83 (0.61-1.12) | 0.89 (0.62-1.27) | 0.89 (0.82-0.97) | 0.93 (0.84-1.02) | 1.07 (1.03-1.12) | 1.01 (0.96-1.05) |
| Abruptio placentae                                           | 1.72 (1.05-2.83) | 1.76 (1.03-3.00) | 1.16 (0.97-1.39) | 1.02 (0.83-1.26) | 0.89 (0.81-0.98) | 0.83 (0.74-0.92) |
| Placenta praevia                                             | 0.50 (0.12-2.00) | 0.57 (0.14-2.30) | 0.32 (0.19-0.53) | 0.28 (0.16-0.50) | 0.52 (0.43-0.61) | 0.52 (0.43-0.63) |
| PPH > 1000 ml (VB)                                           | 0.70 (0.54-0.89) | 0.65 (0.48-0.88) | 0.57 (0.53-0.61) | 0.64 (0.59-0.70) | 0.71 (0.69-0.74) | 0.78 (0.75-0.81) |
| PPH > 1000 ml (CS)                                           | 0.73 (0.18-2.93) | 0.52 (0.07-3.74) | 0.87 (0.59-1.27) | 1.16 (0.77-1.93) | 0.99 (0.92-1.07) | 1.09 (0.93-1.28) |
| Epidural analgesia‡                                          | 1.03 (0.95-1.12) | 1.03 (0.93-1.13) | 1.07 (1.06-1.08) | 1.07 (1.04-1.10) | 1.02 (1.01-1.03) | 1.03 (1.01-1.04) |
|                                                              | 30 - 34 years    |                  | 35 - 39 years    |                  | 40+ years        |                  |
| Perineal laceration grade 1-2‡                               | 1.33 (1.31-1.34) | 1.11 (1.10-1.13) | 1.37 (1.34-1.40) | 1.08 (1.05-1.10) | 1.32 (1.25-1.39) | 1.00 (0.94-1.07) |
| Perineal laceration grade 3-4‡                               | 1.31 (1.27-1.36) | 1.16 (1.12-1.20) | 1.29 (1.23-1.36) | 1.12 (1.05-1.18) | 1.10 (0.96-1.26) | 0.88 (0.75-1.02) |
| Preeclampsia                                                 | 0.95 (0.92-0.99) | 1.07 (1.03-1.12) | 1.18 (1.12-1.25) | 1.30 (1.22-1.39) | 1.60 (1.44-1.79) | 1.83 (1.62-2.06) |
| Abruptio placentae                                           | 1.19 (1.09-1.30) | 1.27 (1.16-1.40) | 1.59 (1.42-1.78) | 1.71 (1.50-1.94) | 2.11 (1.70-2.63) | 2.09 (1.62-2.71) |
| Placenta praevia                                             | 1.77 (1.58-1.99) | 1.74 (1.53-2.00) | 3.55 (3.11-4.06) | 3.47 (2.99-4.03) | 5.02 (4.00-6.29) | 5.23 (4.08-6.70) |
| PPH > 1000 ml (VB)                                           | 1.41 (1.37-1.45) | 1.27 (1.23-1.31) | 1.69 (1.62-1.76) | 1.47 (1.40-1.53) | 1.86 (1.69-2.05) | 1.48 (1.26-1.52) |
| PPH > 1000 ml (CS)                                           | 1.14 (1.01-1.28) | 1.04 (0.91-1.18) | 1.06 (0.91-1.24) | 0.95 (0.81-1.12) | 1.48 (1.17-1.88) | 1.35 (1.05-1.73) |
| Epidural analgesia‡                                          | 1.08 (1.06-1.09) | 1.03 (1.02-1.05) | 1.14 (1.12-1.17) | 1.06 (1.04-1.09) | 1.10 (1.04-1.15) | 0.98 (0.93-1.03) |

Reference group: Maternal age 25-29 years.

CI = confidence intervals; CS = Caesarean section; GA = gestational age at delivery; N/A = not applicable; aOR = adjusted odds ratio; PPH = postpartum haemorrhage; VD = vaginal birth.

† Adjusted for maternal BMI and smoking habits at first antenatal care visit and year of birth. CS and preeclampsia also adjusted for gestational age. ‡ Caesarean section was subdivided into elective and acute CS from 1999. § Forceps, vacuum extraction, epidural analgesia and perineal lacerations among vaginally delivered women.

Table 4. Neonatal outcome data in singleton primiparous women in the period 1992-2010 in relation to maternal age group.

| Characteristics                | Crude OR (95%CI) |                  | aOR (95%CI) <sup>†</sup> |                  | Crude OR (95%CI) |                  | aOR (95%CI) <sup>†</sup> |  |
|--------------------------------|------------------|------------------|--------------------------|------------------|------------------|------------------|--------------------------|--|
|                                | < 17 years       |                  | 17-19 years              |                  | 20-24 years      |                  | 30 - 34 years            |  |
| Foetal distress                | 0.62 (0.31-1.24) | 0.52 (0.22-1.26) | 0.76 (0.63-0.91)         | 0.63 (0.51-0.79) | 0.93 (0.86-1.01) | 0.79 (0.72-0.91) |                          |  |
| Aspiration of meconium         | N/A              | N/A              | 0.47 (0.32-0.67)         | 0.46 (0.31-0.70) | 0.90 (0.80-1.03) | 0.93 (0.81-1.07) |                          |  |
| Shoulder dystocia <sup>‡</sup> | 0.45 (0.11-1.82) | 0.32(0.05-2.29)  | 0.74 (0.58-0.90)         | 0.74 (0.52-1.07) | 1.01 (0.88-1.16) | 1.00 (0.86-1.16) |                          |  |
| Stillbirth                     | 0.99 (0.47-2.08) | 0.58 (0.19-1.80) | 1.15 (0.94-1.42)         | 0.97 (0.75-1.25) | 1.03 (0.93-1.15) | 0.98 (0.87-1.11) |                          |  |
| SGA                            | 1.32 (1.07-1.63) | 1.00 (0.78-1.28) | 1.31 (1.23-1.40)         | 1.01 (0.94-1.09) | 1.11 (1.07-1.14) | 1.00 (0.96-1.04) |                          |  |
| LGA                            | 1.01 (0.75-1.34) | 1.08 (0.76-1.53) | 0.92 (0.84-1.00)         | 1.03 (0.94-1.14) | 1.05 (1.00-1.09) | 1.05 (1.00-1.10) |                          |  |
| Apgar score < 7 at 5 minutes   | 1.31 (0.96-1.77) | 1.30 (0.91-1.86) | 0.92 (0.83-1.03)         | 0.92 (0.81-1.11) | 0.93 (0.89-0.99) | 0.93 (0.88-0.98) |                          |  |
|                                | 30 - 34 years    |                  | 35 - 39 years            |                  | 40+ years        |                  |                          |  |
| Foetal distress                | 0.96 (0.89-1.04) | 1.23 (1.13-1.35) | 1.14 (1.02-1.27)         | 1.51 (1.33-1.72) | 0.98 (0.75-1.28) | 1.60 (1.20-2.13) |                          |  |
| Aspiration of meconium         | 1.27 (1.13-1.42) | 1.36 (1.20-1.54) | 1.42 (1.21-1.67)         | 1.48 (1.24-1.77) | 1.83 (1.34-2.51) | 1.82 (1.28-2.58) |                          |  |
| Shoulder dystocia <sup>‡</sup> | 1.18 (1.04-1.35) | 1.13 (0.90-1.41) | 1.13 (0.91-1.39)         | 1.13 (0.91-1.41) | 1.47 (0.93-2.33) | 1.27 (0.76-2.12) |                          |  |
| Stillbirth                     | 1.26 (1.14-1.38) | 1.25 (1.12-1.39) | 1.85 (1.64-2.10)         | 1.72 (1.49-1.99) | 2.77 (2.22-3.46) | 2.34 (1.80-3.03) |                          |  |
| SGA                            | 1.20 (1.16-1.24) | 1.24 (1.20-1.28) | 1.63 (1.56-1.70)         | 1.65 (1.58-1.73) | 2.04 (1.87-2.22) | 2.06 (1.87-2.26) |                          |  |
| LGA                            | 0.94 (0.91-0.98) | 0.94 (0.90-0.98) | 1.03 (0.97-1.09)         | 0.97 (0.91-1.04) | 1.07 (0.93-1.22) | 0.94 (0.81-1.09) |                          |  |
| Apgar score < 7 at 5 minutes   | 1.18 (1.13-1.24) | 1.18 (1.12-1.24) | 1.47 (1.38-1.56)         | 1.39 (1.29-1.49) | 1.65 (1.44-1.88) | 1.51 (1.30-1.75) |                          |  |

Reference group: Maternal age 25-29 years.

CI = confidence interval; LGA = large for gestational age; N/A = not applicable; aOR = adjusted odds ratio; SGA = small for gestational age

<sup>†</sup> Adjusted for maternal BMI and smoking habits at first antenatal care visit and year of birth

<sup>‡</sup> Shoulder dystocia among vaginal delivered women.

1 ***Mode of delivery, obstetric and neonatal outcome of adolescents***

2  
3  
4 2 Compared with the reference group the teenagers had a significantly higher likelihood of having  
5  
6 3 spontaneous onset of labour and of having a normal vaginal delivery. Teenagers also demonstrated a  
7  
8 4 significantly higher risk of giving birth prematurely. However, only the group of teenagers younger  
9  
10 5 than 17 years of age had an increased risk of giving birth very prematurely i.e. before 28 weeks of  
11  
12 6 gestational age, and the same group revealed a significantly higher risk of placental abruption. In  
13  
14 7 contrast with these observations the teenagers were delivered instrumentally and by CS significantly  
15  
16 8 less often, and the vaginal births caused significantly fewer perineal lacerations (only evaluated among  
17  
18 9 women who delivered vaginally) and PPH > 1000 ml. Likewise the occurrence of placenta previa was  
19  
20 10 seen less often among teenagers whereas the occurrence of preeclampsia was equal to that seen in the  
21  
22 11 reference group.

23  
24  
25  
26  
27  
28 12 Concerning the foetal and neonatal outcomes for adolescents the newborns were less likely to show  
29  
30 13 foetal distress and meconium aspiration in spite of a similar occurrence of Apgar score < 7 at 5  
31  
32 14 minutes. The newborns of the adolescents were not more prone to being stillborn or being SGA than  
33  
34 15 the newborns of women in the reference group. The adjusted mean birth weight of newborns of  
35  
36 16 adolescents did not differ significantly from that of women up to 29 years of age (Figure 1).

37  
38  
39  
40 17 ***Mode of delivery, obstetric and neonatal outcome of women 20-24 years of age***

41  
42 18 The young women, 20 – 24 years of age, differed in some aspects from the reference group as well as  
43  
44 19 from the adolescents. They were less likely to be delivered prematurely and had a lower frequency of  
45  
46 20 placental abruption. Otherwise the obstetric and neonatal outcomes were similarly favourable as those  
47  
48 21 observed for the adolescents in comparison with the reference group.

49  
50  
51  
52 22 ***Mode of delivery, obstetric and neonatal outcome of women older than 29 years of age***

53  
54  
55 23 As shown in Table 3 compared with the reference group almost all obstetric outcome variables  
56  
57 24 demonstrated a continuously progressive deterioration with increasing age. The likelihood of normal  
58  
59  
60

1 25 vaginal births decreased; induced labour, instrumental deliveries and CS increased as well as  
2  
3  
4 26 prematurity including very premature deliveries. The risk of perineal laceration increased moderately  
5  
6 27 whereas the risk of PPH > 1000 ml in vaginal births was more pronounced. The likelihood of the  
7  
8 28 pregnancy complications preeclampsia, abruptio placenta and placenta previa was also higher in the  
9  
10 29 older age groups and progressed substantially with increasing age. Similarly, the foetal and neonatal  
11  
12 30 outcome was adversely progressively influenced by increasing maternal age. With increasing maternal  
13  
14 31 age over 30 years significantly more neonates were SGA, showed foetal distress, had Apgar score < 7  
15  
16 32 at 5 minutes or meconium aspiration, or were stillborn. The mean birth weight of the neonates also  
17  
18 33 decreased significantly with increasing maternal age after the age of 30 (Figure 1).  
19  
20  
21  
22  
23 34  
24  
25  
26  
27  
28  
29  
30  
31  
32  
33  
34  
35  
36  
37  
38  
39  
40  
41  
42  
43  
44  
45  
46  
47  
48  
49  
50  
51  
52  
53  
54  
55  
56  
57  
58  
59  
60

## DISCUSSION

This Swedish nation-wide population-based study with prospectively collected data concerning singleton primiparous women showed that the mode of delivery differed over the maternal age strata. Significantly more normal vaginal deliveries and fewer CS and instrumental vaginal deliveries were seen among the teenagers and among women aged 20-24 compared with the reference group of women aged 25-29. The opposite was found among older women reaching a 4-fold increased risk for CS compared with women aged 20-24. The teenagers as well as women aged 20-24 were less prone to perineal lacerations and PPH exceeding 1000 ml. Prematurity (< 28 weeks of GA) was associated with very low maternal age (<17 years) among the adolescents although the increased risk was at the same level as among women aged 40 years and above, indicating a u-shaped risk curve. Adolescents were not afflicted more by preeclampsia than the reference women whereas the risk of preeclampsia increased significantly with advancing maternal age. The risk of placenta praevia increased dramatically with maternal age, actually a 500% increased risk was found after the age of 40 compared with the reference group. There was a significantly increased risk of stillbirth, SGA and low Apgar score only in women aged 30 years and over.

The most prominent difference between the findings in the present study and earlier studies is that no increased risk for SGA was found among the adolescents and young mothers 20-24 years of age compared with the reference women.[8-9] It must be kept in mind that the definition of SGA may differ between countries. In the United States and Latin America SGA is usually defined as birth weight below the 10<sup>th</sup> percentile compared with two SD in the Nordic countries.[3, 9] Adjusted risks for SGA among teenagers, recently presented from Finland, one of the Nordic countries, showed no increased risk among the youngest mothers.[6] In that study the control group was defined in the same way as in the present study. Differences concerning the risk for SGA could also be attributable to differences in socio-economic status. Chen et al. restricted their analysis to white married mothers with age-appropriate education level, adequate prenatal care, without smoking and alcohol use during pregnancy



1 60 but found the increased risk for SGA to persist.[3] Several studies have shown low infant birth weight  
2  
3 61 for adolescents as well as for mothers with advancing age.[18, 14, 26, 27] We failed to find such  
4  
5 62 association among the adolescents, but in women with advancing age the difference in birth weight was  
6  
7 63 statistically significant although the difference lacked clinical significance.  
8  
9

10 64 The finding of a preferable birth outcome with lower CS rates and lower rates of instrumental delivery  
11  
12 65 among teenagers compared with older women has been pinpointed to a lesser extent than observed  
13  
14 66 adverse outcomes. Earlier studies have shown relatively consistent results concerning a decreased rate  
15  
16 67 of CS in the adolescent group and a higher rate in women with advancing age.[6, 8, 9, 12-18] We were  
17  
18 68 able to evaluate elective and emergency CS separately and the risks among the teenagers and mothers  
19  
20 69 age 20-24 years were decreased for both types. This might indicate that the different risks concerning  
21  
22 70 CS among young and older mothers could not exclusively be explained by more CS on maternal  
23  
24 71 request among older mothers but may even be caused by biological factors. A low rate of instrumental  
25  
26 72 deliveries and CS among adolescents and a high rate among older women have almost unanimously  
27  
28 73 been shown in several reports from high-income as well as low-income countries.[5, 7, 12-18, 26-29]  
29  
30 74 Whether this phenomenon depends on differences in handling the delivery, inherent or cultural  
31  
32 75 behavioural, domestic or social attitudes among the obstetric staff or biological factors has not been  
33  
34 76 investigated. Advancing age is associated with impaired uterine contractility as well as endothelial  
35  
36 77 dysfunction which theoretically may lead to impaired uterine and utero-placental function.[30, 31] The  
37  
38 78 fact that adolescents in our study had a lower risk of induction of labour, perineal laceration, PPH,  
39  
40 79 abruption (except for the very young women) and placenta previa and women with advancing age had  
41  
42 80 higher risks of all these outcomes including preeclampsia could support a biological explanation.  
43  
44 81 Concerning prematurity the age related risk curve was U shaped. This may also support a biological  
45  
46 82 aetiology; immaturity of the uterus in the very young women that obstruct development of a term  
47  
48 83 pregnancy and uterine dysfunction caused by ageing processes in women with advancing age and  
49  
50 84 consequently deliver prematurely in both situations. The neonatal outcomes followed almost the same  
51  
52  
53  
54  
55  
56  
57  
58  
59  
60

1 85 pattern; foetal distress, meconium aspiration, stillbirth, SGA and low Apgar score were exclusively  
2  
3  
4 86 attributed to women older than 29.  
5  
6 87 The strength of this study is that it deals with the outcomes in the population of an entire country where  
7  
8 88 the antenatal care program is equally available to all pregnant women and is comprehensive. In Sweden  
9  
10 89 pregnant women have completely cost free access to antenatal and obstetric facilities; poverty and  
11  
12 90 malnutrition are practically non-existent and the vast majority of women attends the antenatal care  
13  
14 91 program (99%) independent of socio-economic status and is delivered in obstetric units.[21] This  
15  
16 92 context is valid for the whole study period. Another advantage is the large number of individuals  
17  
18 93 available for evaluation, which makes it possible to divide the study population into subgroups with  
19  
20 94 sufficient numbers in each stratum to provide high statistical power. A sufficient number of study  
21  
22 95 subjects made it possible to evaluate three subgroups of young maternal age. Only primiparous women  
23  
24 96 were included in order to avoid the confounding effects of factors associated with subsequent  
25  
26 97 deliveries. There are limitations that should be considered. The external validity is reduced to facilities  
27  
28 98 with similar socio-economic and demographic characteristics and health care systems with comparable  
29  
30 99 standards. The drawback is obvious given the large size of the study and the numbers of health care  
31  
32 100 units involved that the criteria for diagnosis (ICD codes) to define outcomes may not be uniform across  
33  
34 101 the study population but the variation is most likely not related to maternal age. The MBR contain a  
35  
36 102 large body of information concerning the mother and the child which made it possible to adjust the  
37  
38 103 results for confounding factors. At the same time this is a limitation as only the data available in the  
39  
40 104 register could be used for adjustments. The register lacks information on ethnicity and socio-economic  
41  
42 105 status. Our effort was to evaluate obstetric and neonatal outcome in different maternal age groups  
43  
44 106 compared with women aged 25-29 overall. The only stratifications made were for year of birth,  
45  
46 107 maternal BMI and smoking in early pregnancy. The data on year of birth showed that there is  
47  
48 108 variability in the existence of obstetric and neonatal diagnoses during the observation period. This may  
49  
50 109 be due to true changes but may also be a result of changes in recording, including the expanding use of  
51  
52  
53  
54  
55  
56  
57  
58  
59  
60

1 110 computerized medical records. It was therefore necessary to adjust for year of birth. Maternal BMI  
2  
3  
4 111 affects obstetric and neonatal outcome.[32] To demonstrate causality between the different outcomes  
5  
6 112 evaluated in the analyses and maternal age a great number of putative intermediaries could have been  
7  
8 113 considered such as the use of fertility treatment, foetal size, gestational weight gain etc., but that was  
9  
10  
11 114 not the purpose of the study. A true confounder affects both the exposure and the outcome. There may  
12  
13 115 be other variables (which are not intermediaries) but we have not been able to identify them. If we take  
14  
15 116 for instance maternal hypertension as an example, it could be of interest. But as the higher risk of  
16  
17  
18 117 hypertension is a consequence of maternal age, it is not a true confounder but an intermediary, a way in  
19  
20 118 which high maternal age can affect obstetric and neonatal pathology.  
21  
22  
23 119 Our approach of analysing the data may be a benefit for clinicians interpreting the results when dealing  
24  
25 120 with young and aged mothers. In conclusion, in a country with a highly developed social and antenatal  
26  
27 121 maternity health care security system giving cost free maternity and obstetric care to all pregnant  
28  
29  
30 122 women adolescents had a decreased risk for adverse obstetric and neonatal outcome compared with the  
31  
32 123 reference group. In the same social context childbirth at advanced maternal age was associated with a  
33  
34 124 number of serious complications for both the woman and the child. For clinicians counselling young  
35  
36  
37 125 mothers it is of great importance to highlight the positive consequences that less obstetric  
38  
39 126 complications and favourable neonatal outcomes are expected. There is also a need to develop  
40  
41 127 surveillance programs in antenatal and obstetric care for older women aiming to prevent and protect the  
42  
43  
44 128 increased risks of adverse outcomes for example to earlier detect preeclampsia or recommending  
45  
46 129 prophylactic uterotonic treatment after birth to avoid extensive postpartum bleeding. Such interventions  
47  
48  
49 130 need to be evaluated in well-designed prospective studies.  
50  
51 131  
52  
53  
54  
55  
56  
57  
58  
59  
60

1  
2 132 **Funding:** The study was supported financially by grants from the County Council of Östergötland and  
3  
4 133 Linköping University.

6  
7  
8 134 **Disclosure of interest:** None of the authors has any conflict of interest to declare.

9  
10  
11 135 **Contribution of authorship:** The study was planned and conducted by PK, MB and RBT, Data was  
12  
13 136 analysed by all three. All authors contributed to the interpretation of the results, the elaboration of the  
14  
15  
16 137 manuscript and approval of the final version.

17  
18 138 **Checklist:** The manuscript conforms to the STROBE requirement.

19  
20 139 **Data sharing statement:** Technical appendix, statistical code, and dataset available from the  
21  
22  
23 140 corresponding author at Dryad repository, who will provide a permanent, citable and open access home  
24  
25 141 for the dataset.

1 142 **REFERENCE LIST**

- 2  
3  
4 143 1. Olausson PM, Cnattingius S, Goldenberg RL. Determinants of poor pregnancy outcomes among  
5  
6 144 teenagers in Sweden. *Obstet Gynecol* 1997;89:451-7.  
7  
8 145 2. Olausson PO, Cnattingius S, Haglund B. Teenage pregnancies and risk of late fetal death and  
9  
10 146 infant mortality. *Br J Obstet Gynaecol* 1999;106:116-21.  
11  
12  
13 147 3. Chen XK, Wen SW, Fleming N, et al. Teenage pregnancy and adverse birth outcomes: a large  
14  
15 148 population based retrospective cohort study. *Int J Epidemiol* 2007;36:368-73.  
16  
17  
18 149 4. Gupta N, Kiran U, Bhal K. Teenage pregnancies: obstetric characteristics and outcome. *Eur J*  
19  
20 150 *Obstet Gynecol Reprod Biol* 2008;137:165–71.  
21  
22  
23 151 5. de Vienne CM, Creveuil C, Dreyfus M. Does young maternal age increase the risk of adverse  
24  
25 152 obstetric, fetal and neonatal outcomes: a cohort study. *Eur J Obstet Gynecol Reprod Biol*  
26  
27 153 2009;147:151–6.  
28  
29  
30 154 6. Leppälähti S, Gissler M, Mentula M, et al. Is teenage pregnancy an obstetric risk in a welfare  
31  
32 155 society? A population-based study in Finland, from 2006 to 2011. *BMJ Open*  
33  
34 156 2013;19:3:e003225.  
35  
36  
37 157 7. Lao TT, Ho LF. Obstetric outcome of teenage pregnancies. *Hum Reprod* 1998;13:3228-32.  
38  
39 158 8. Malabarey OT, Balayla J, Klam SL, et al. Pregnancies in young adolescent mothers: a  
40  
41 159 population-based study on 37 million births. *J Pediatr Adolesc Gynecol* 2012;25:98-102.  
42  
43  
44 160 9. Conde-Agudelo A, Belizán JM, Lammers C. Maternal-perinatal morbidity and mortality  
45  
46 161 associated with adolescent pregnancy in Latin America: Cross-sectional study. *Am J Obstet*  
47  
48 162 *Gynecol* 2005;192:342-9.  
49  
50  
51 163 10. Mukhopadhyay P, Chaudhuri RN, Paul B. Hospital-based perinatal outcomes and complications  
52  
53 164 in teenage pregnancy in India. *J Health Popul Nutr* 2010;28:494-500.  
54  
55  
56 165 11. Ayuba II, Gani O. Outcome of teenage pregnancy in the niger delta of Nigeria. *Ethiop J Health*  
57  
58 166 *Sci* 2012;22:45-50.  
59  
60

- 1 167 12. Jolly M, Sebire N, Harris J, et al. The risks associated with pregnancy in women aged 35 years or  
2  
3  
4 168 older. *Hum Reprod* 2000;15:2433-7.
- 5  
6 169 13. Jacobsson B, Ladfors L, Milsom I. Advanced maternal age and adverse perinatal outcome. *Obstet*  
7  
8 170 *Gynecol* 2004;104:727-33.
- 9  
10  
11 171 14. Cleary-Goldman J, Malone FD, Vidaver J, et al. Impact of maternal age on obstetric outcome.  
12  
13 172 *Obstet Gynecol* 2005;105:983-90.
- 14  
15 173 15. Joseph KS, Allen AC, Dodds L, et al. The perinatal effects of delayed child bearing. *Obstet*  
16  
17 174 *Gynecol* 2005;105:1410-8.
- 18  
19  
20 175 16. Luke B, Brown MB. Elevated risks of pregnancy complications and adverse outcomes with  
21  
22 176 increasing maternal age. *Hum Reprod* 2007;22:1264-72.
- 23  
24  
25 177 17. Delbaere I, Verstraelen H, Goetgeluk S, et al. Pregnancy outcome in primiparae of advanced  
26  
27 178 maternal age. *Eur J Obstet Gynecol Reprod Biol* 2007;135:41-6.
- 28  
29  
30 179 18. Hsieh TT, Liou JD, Hsu JJ, et al. Advanced maternal age and adverse perinatal outcomes in an  
31  
32 180 Asian population. *Eur J Obstet Gynecol Reprod Biol* 2010;148:21-6.
- 33  
34 181 19. Matsuda Y, Kawamichi Y, Hayashi K, et al. Impact of maternal age on the prevalence of  
35  
36 182 obstetrical complications in Japan. *J Obstet Gynaecol Res* 2011;37:1409-14.
- 37  
38  
39 183 20. Biro MA, Davey MA, Carolan M, et al. Advanced maternal age and obstetric morbidity for  
40  
41 184 women giving birth in Victoria, Australia: A population-based study. *Aust N Z J Obstet*  
42  
43 185 *Gynaecol*.2012;52:229-34.
- 44  
45  
46 186 21. Lindmark G, Cnattingius S. The scientific basis of antenatal care routines: Report from a state-of-  
47  
48 187 art conference. *Acta Obstet Gynecol Scand* 1991;70:105-9.
- 49  
50  
51 188 22. Källen B, Källen K, Olausson PO. The Swedish Medical Birth Register: a summary of content  
52  
53 189 and quality. Research Report, Article no: 2003-112-3. Centre for Epidemiology, National Board  
54  
55 190 of Health and Welfare Stockholm 2003. Available from:  
56  
57 191 <http://www.socialstyrelsen.se/publikationer2003/2003-112-3> (Accessed May 2014.)  
58  
59  
60

- 1 192 23. Cnattingius S, Ericson A, Gunnarskog J, et al. A quality study of a medical birth registry. *Scand J*  
 2  
 3  
 4 193 *Soc Med* 1990;18:143–8.  
 5  
 6 194 24. Axelsson O. The Swedish medical birth register. *Acta Obstet Gynecol Scand* 2003;82:491.  
 7  
 8 195 25. Källén B. A birth weight for gestational age standard based on data in the Swedish Medical Birth  
 9  
 10 196 Registry, 1985-1989. *Eur J Epidemiol* 1995;11:601-6.  
 11  
 12  
 13 197 26. Shrim A, Ates S, Mallozzi A, et al. Is young maternal age really a risk factor for adverse  
 14  
 15 198 pregnancy outcome in a Canadian tertiary referral hospital? *J Pediatr Adolesc Gynecol*  
 16  
 17 199 2011;24:218-22.  
 18  
 19  
 20 200 27. Jivraj S, Nazzal Z, Davies P, et al. Obstetric outcome of teenage pregnancies from 2002 to 2008:  
 21  
 22 201 the Sheffield experience. *J Obstet Gynaecol* 2010;30:253-6.  
 23  
 24  
 25 202 28. Beyer DA, Amari F, Diedrich K, et al. Teenage deliveries in Northern Germany: always a risk  
 26  
 27 203 factor for higher surgical delivery rates? *Arch Gynecol Obstet* 2011;284:535-8.  
 28  
 29  
 30 204 29. Jolly MC, Sebire N, Harris J, et al. Obstetric risks of pregnancy in women less than 18 years old.  
 31  
 32 205 *Obstet Gynecol* 2000;96:962-6.  
 33  
 34 206 30. Nelson SM, Telfer EE, Anderson RA. The ageing ovary and uterus: new biological insights. *Hum*  
 35  
 36 207 *Reprod Update* 2013 ;19:67-83.  
 37  
 38  
 39 208 31. Taddei S, Virdis A, Ghiadoni L, et al. Endothelium, aging, and hypertension. *Curr Hypertens Rep*  
 40  
 41 209 2006;8:84-9.  
 42  
 43  
 44 210 32. Cedergren MI. Maternal morbid obesity and the risk of adverse pregnancy outcome. *Obstet*  
 45  
 46 211 *Gynecol* 2004;103:219-24.  
 47

## 48 LEGENDS

49 212  
 50  
 51 213 Figure 1. Adjusted mean birth weight of neonates in singleton primiparous women in different  
 52  
 53 214 maternal age groups. Birth weight adjusted for gestational age, maternal BMI and smoking habits, and  
 54  
 55 215 year of delivery. Plots indicate means and bars 95% CI.  
 56  
 57  
 58  
 59  
 60

1  
2  
3  
4  
5  
6  
7  
8 1  
9  
10 2 **Impact of maternal age on obstetric and neonatal outcome with**  
11  
12 3 **emphasis on primiparous adolescents and older women-a Swedish**  
13  
14  
15 4 **Medical Birth Register Study.**  
16  
17  
18 5

19 6 Marie Blomberg MD, PhD, Rasmus Birch Tyrberg,- BMs, and Preben Kjølhede, MD, PhD

20 7  
21 7 Department of Obstetrics and Gynaecology and Department of Clinical and Experimental Medicine,  
22  
23 8 Linköping University, Linköping, Sweden

24  
25 9  
26  
27 10 Corresponding author:

28  
29 11 Marie Blomberg, MD, PhD

30  
31 12 Department of Obstetrics and Gynaecology,

32  
33 13 University Hospital

34  
35 14 581 85 Linköping

36  
37 15 Sweden

38  
39 16 Phone +46 10 103 00 00

40  
41 17 E-mail: marie.blomberg@lio.se

42  
43 18 Keywords: maternal age, mode of delivery, neonatal outcome, obstetric outcome, adolescents

44  
45 19 Word count: 3201 words  
46  
47  
48  
49  
50  
51  
52  
53  
54  
55  
56  
57  
58  
59  
60



## Abstract

**Objectives:** To evaluate the associations between maternal age and obstetric and neonatal outcomes in primiparous women with emphasis on teenagers and older women.

**Design:** A population-based cohort study.

**Setting:** The Swedish Medical Birth Register.

**Participants:** Primiparous women with singleton births from 1992 through 2010 (N=798,674) were divided into seven age groups: <17 years, 17-19 years, and additional five five-year classes. The reference group consisted of the women age 25-29 years.

**Primary outcome:** Obstetric and neonatal outcome.

**Results:** The teenager groups had significantly more vaginal ~~deliveries~~ births (OR 2.04 (1.79-2.32) and 1.95 (1.88-2.02) for age <17 years and 17-19 years, respectively); fewer caesarean sections (OR 0.57 (0.48-0.67) and 0.55 (0.53-0.58)), and instrumental vaginal deliveries ~~births~~ (OR 0.43 (0.36-0.52) and 0.50 (0.48-0.53)) compared with ~~women age 25-29~~ the reference group. The opposite was found among older women reaching a 4-fold increased risk for caesarean section. The teenagers showed no increased risk of adverse neonatal outcome but presented an increased risk of prematurity <32 weeks (OR 1.66 (1.10-2.51) and 1.20 (1.04-1.38)). Women with advancing age ( $\geq 30$  years) revealed significantly increased risk of prematurity, perineal lacerations, preeclampsia, abruption, placenta previa, postpartum haemorrhage and unfavourable neonatal outcomes compared with ~~women age 25-29~~ the reference group.

**Conclusions:** For clinicians counselling young women mothers it is of importance to highlight the obstetrically positive consequences that fewer maternal complications and favourable neonatal outcomes are expected. ~~The average age of primiparous women has increased and women over 30 years seem to be at a higher risk of severe adverse obstetric and neonatal outcome. There is a need to develop surveillance programs in obstetric care customized for older women.~~

1  
2  
3  
4  
5  
6  
7  
8  
9  
10  
11  
12  
13  
14  
15  
16  
17  
18  
19  
20  
21  
22  
23  
24  
25  
26  
27  
28  
29  
30  
31  
32  
33  
34  
35  
36  
37  
38  
39  
40  
41  
42  
43  
44  
45  
46  
47  
48  
49  
50  
51  
52  
53  
54  
55  
56  
57  
58  
59  
60

48 There is also a need to develop surveillance programs in antenatal and obstetric care for older women  
49 aiming for example to detect preeclampsia earlier or recommending prophylactic uterotonic treatment  
50 after birth to avoid extensive postpartum bleeding. Such interventions need to be evaluated in further  
51 studies.

For peer review only

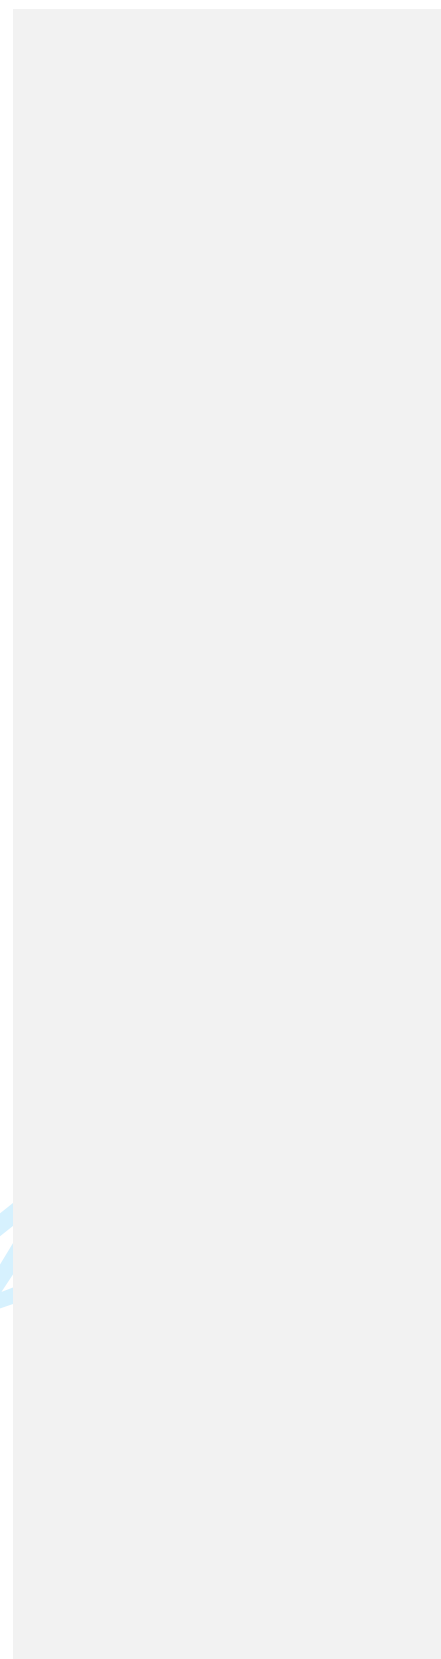

1  
2  
3  
4  
5  
6  
7  
8 53 **Article summary**

9  
10 54 **Impact of maternal age on obstetric and neonatal outcome with emphasis on [primiparous](#)**  
11  
12 55 **adolescents and older women-a Swedish Medical Birth Register Study.**

13  
14 56 Strengths and limitations of this study:

- 15 57
- 16 58 • A strength of the present study is that it includes primiparous women of an entire country where  
17 59 the antenatal care program is equally available to all pregnant women and is comprehensive.
  - 18 60 • Another advantage is the large number of individuals available for evaluation, which makes it  
19 61 possible to divide the study population into subgroups with sufficient numbers in each stratum  
20 62 to provide high statistical power.
  - 21 63 • A limitation is that the external validity is reduced to facilities with similar socio-economic and  
22 64 demographic characteristics and health care systems with comparable standards.
  - 23 65 • The Swedish medical birth register contain a large body of information concerning the mother  
24 66 and the child but only the available data in the register could be used for outcome evaluation  
25 67 and adjustments for putative confounders.
- 26  
27  
28  
29  
30  
31  
32  
33  
34  
35  
36  
37  
38  
39  
40  
41  
42  
43  
44  
45  
46  
47  
48  
49  
50  
51  
52  
53  
54  
55  
56  
57  
58  
59  
60

## INTRODUCTION

There are a large number of studies evaluating obstetric and neonatal outcome over the full range of reproductive maternal ages, but especially with a focus on the youngest and the oldest mothers. Young mothers have been shown to be exposed to an increased risk of anaemia, low birth weight, foetal death, eclampsia and preterm birth although they at the same time were more likely to have a spontaneous normal vaginal ~~birth delivery~~ and the risk of preeclampsia and post-partum haemorrhage were significantly decreased.[1-6] These studies evaluated outcomes in ~~low-income~~~~developed~~ countries. Many studies performed in ~~developing~~~~low-income~~ countries presented in recent years on the topic of teenage pregnancies have found similar obstetric and neonatal outcomes.[7-11]

Complications during pregnancy and ~~delivery~~~~birth~~ at advanced maternal age (either defined as 35 years and older or 40 years or older) have also been evaluated in ~~high-income~~~~developed~~ countries. Advanced maternal age at birth has been found to be associated with gestational diabetes, preeclampsia, placenta previa, caesarean section (CS), placental abruption, preterm delivery, low birth weight, intrauterine foetal death and an increased perinatal mortality.[12-20] The difference in obstetric and neonatal outcomes between teenagers and women at advanced age seemed to be lower risks for several unwanted and threatening outcomes in the teenage group; thus there were no obvious ~~benefits~~ ~~advantages~~ concerning obstetric and neonatal outcomes at advanced maternal ages. The earlier published studies concerning the impact of maternal age on perinatal outcome differ in many aspects methodologically as well as in ~~the~~ socio-demographic characteristics of the populations and health care systems. All these factors make interpretation of comparisons between data sets difficult.

Sweden has ~~during several decades~~ actively developed strategies in social care, education and health care in order to ~~improve antenatal care and~~ parenthood. In a Swedish state-of-the-art conference held in 1990, the scientific basis of the routine antenatal program was critically evaluated. It was concluded that the scientific evidence to support the timing and contents of routine visits was unsatisfactory.[21] Consequently there is a constant need for evaluation both of single diagnostic procedures and

1  
2  
3  
4  
5  
6  
7  
8 93 | [intervention and of outcomes.](#) An analysis of perinatal outcomes in relation to maternal age in the  
9  
10 94 | Swedish population will provide important knowledge that may be used to further improve social,  
11 95 | antenatal, obstetric and neonatal care [and reveals risk groups that in particular may need more attention](#)  
12  
13 96 | [in the antenatal care.](#)  
14

15 97 | The objective of the present study was to assess the impact of maternal age on obstetric and neonatal  
16  
17 98 | outcomes among singleton primiparous women in Sweden, with special emphasis on the adolescents  
18  
19 99 | and older mothers.  
20

## MATERIALS AND METHODS

This study analyses the obstetric and neonatal outcomes of all singleton primiparous women prospectively registered in the Swedish Medical Birth Register (MBR) who gave births from January 1, 1992 through December 31, 2010. MBR has collected information about births-deliveries in Sweden since 1973. It is compulsory for every health care provider to report to the MBR. Medical and other data on almost all (99%) births-deliveries in Sweden are listed in the register, which also includes stillbirths. Starting with the first antenatal visit, usually in gestational week 10-12, the information is collected prospectively in standardized medical record forms completed at the maternity health care centers at antenatal care visits, in the birth-delivery units, and at the paediatric examination of the newborn. The standardized medical records are identical throughout the country. A description and validation of the register content is available.[22-24]

The study population was grouped according to maternal age into seven subgroups: <17 years; 17-19 years; 20-24 years, 25-29 years, 30-34 years; 35-39 years and 40+ years. In the outcome analyses we selected the group of women age 25-29 years as reference group, since “the average singleton primiparous woman” with respect to age in the time period of the study fell into this interval (Figure 1).

The list of available variables in MBR has been extended throughout the years that the register has been active. The obstetric and neonatal outcome data for the purpose of this study are those that have been available since 1992. From 1992 until June 2008 the MBR includes stillbirths after 28 weeks of gestation and from July 2008 until 2010 all stillbirths after 22 weeks of gestation are included. Each outcome studied was either marked in the MBR or registered according to the International Statistical Classification of Diseases and Related Health Problems (ICD). The obstetric outcome variables studied were gestational age, mode of delivery; normal vaginal birth (defined as neither instrumental vaginal delivery, nor CS), CS, instrumental vaginal delivery divided into forceps and vacuum extraction, mode of onset of labour, perineal laceration, preeclampsia, abruptio placentae, placenta previa, use of epidural analgesia and postpartum haemorrhage (PPH) exceeding 1000 ml. The foetal and neonatal

1  
2  
3  
4  
5  
6  
7  
8 126 | outcomes evaluated were Apgar-score at 5 minutes, foetal distress (ICD code [P20.0, P20.1 and P20.9](#)),  
9  
10 127 | aspiration of meconium (ICD code [P24.0](#)), shoulder dystocia (ICD code [O66.0](#)), and stillbirth. Small-  
11 128 | for-gestational age (SGA) [infantsnewborns](#) were defined as those with birth weight more than 2  
12  
13 129 | standard deviations (SD) below the mean birth weight for gestational age (sex and parity specific)  
14  
15 130 | according to a Swedish reference curve.[25] Large-for-gestational age (LGA) [infantsnewborns](#) were  
16  
17 131 | those with a birth weight above 2 SD. All descriptive and background data were extracted from the  
18  
19 132 | MBR. The register information on these variables was obtained from the antenatal care center records.  
20  
21 133 | The study was approved by the Regional Ethical Review Board in Linköping, Sweden (Dnr 2011/479-  
22  
23 134 | 31. Approved January 25; 2012).

#### 24 25 135 | **Statistical analysis**

26  
27 136 | Data are presented as counts and per cent or mean and one SD. Logistic regression analyses were used  
28  
29 137 | for comparison of groups for categorical data. Data on a continuous scale were compared using  
30  
31 138 | analysis of covariance (ANCOVA). Multivariate logistic regression models were used in order to adjust  
32  
33 139 | comparisons for the confounding factors. Consequently [crude and](#) adjusted odds ratios (OR [and aOR](#))  
34  
35 140 | and 95% confidence intervals (CIs) are reported. Maternal weight and height (used for calculation of  
36  
37 141 | maternal Body Mass Index (BMI)) and smoking habits in early pregnancy (unknown, no smoking,  
38  
39 142 | smoking) and year of [deliverybirth](#) were included as confounders in the adjusted analyses. Gestational  
40  
41 143 | age was added to the confounders in the analyses of CS, preeclampsia and birth weight.

41 144 | [The OR for instrumental vaginal delivery was calculated among women with vaginal births only in](#)  
42  
43 145 | [order to exclude women with an instrumental attempt to deliver followed by an emergency CS. The](#)  
44  
45 146 | [ORs of perineal lacerations were also estimated among women with vaginal births only. The](#)  
46  
47 147 | [information concerning use of epidural analgesia was also restricted to vaginal births only. Epidural is](#)  
48  
49 148 | [an analgesic method that has been widely used in the delivery wards for vaginal births during the entire](#)  
50  
51 149 | [time period. In contrast the use of epidural analgesia in CS has varied substantially over the time period](#)  
52  
53 150 | [and has almost exclusively been used in elective CS. Our purpose was to evaluate the odds ratio for](#)

1  
2  
3  
4  
5  
6  
7  
8  
9  
10  
11  
12  
13  
14  
15  
16  
17  
18  
19  
20  
21  
22  
23  
24  
25  
26  
27  
28  
29  
30  
31  
32  
33  
34  
35  
36  
37  
38  
39  
40  
41  
42  
43  
44  
45  
46  
47  
48  
49  
50  
51  
52  
53  
54  
55  
56  
57  
58  
59  
60

151 [epidural use over the maternal age strata and consequently we selected the mode of delivery that](#)  
152 [exhibited the least variation in the use of the analgesic method over the time period, i.e. vaginal births.](#)  
153 The software STATISTICA 64 version 10 (StatSoft Inc. 2300 East 14<sup>th</sup> St. Tulsa, OK 74104 USA) was  
154 used to carry out the statistical analyses.

For peer review only

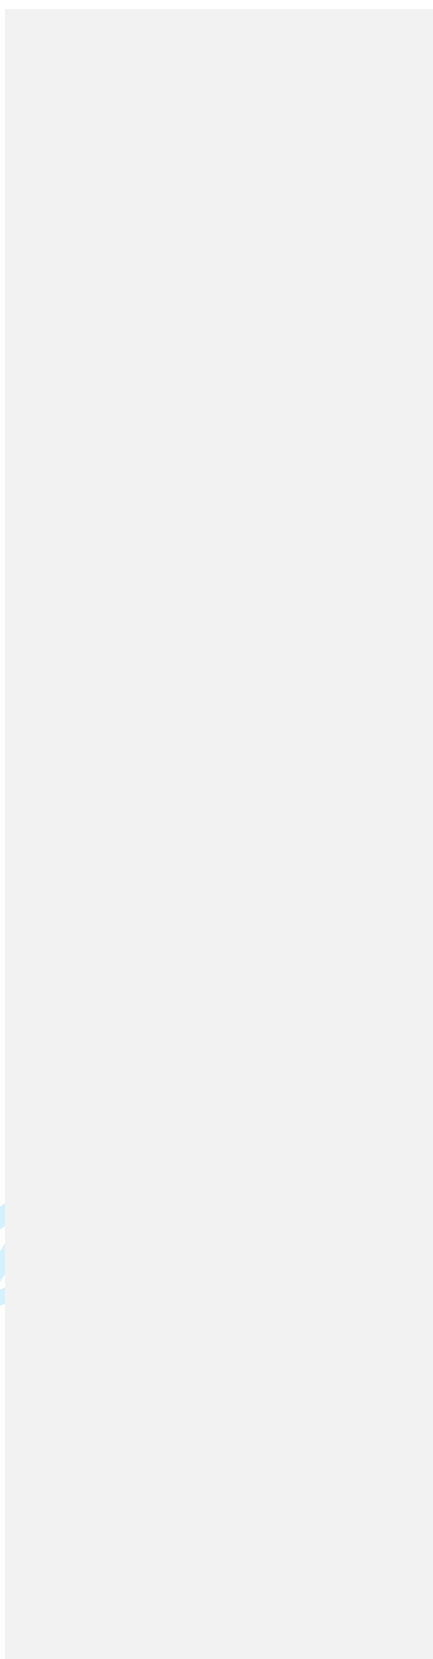



## RESULTS

In the period 1992 – 2010, 798,732 women were registered in the MBR as giving birth to their first child. [The annual number of primiparous women giving birth varied between 34060 and 49417.](#) Information on maternal age was missing in 58 cases leaving 798,674 women for the analyses. The average age of primiparous women increased substantially from 26.2 years in 1992 to 28.5 in 2004; hereafter it has stayed almost constant at that level. The demographic, obstetric and neonatal data subdivided into maternal age groups are presented in Table 1 and 2.

Table 1. Descriptive data of primiparous women with singleton births in the period 1992-2010.

| Characteristics             | < 17 years<br>(n=2392) |       | 17-19 years<br>(n=29816) |       | 20-24 years<br>(n=185942) |       | 25-29 years<br>(n=300822) |       | 30-34 years<br>(n=205905) |       | 35-39 years<br>(n=63163) |       | 40+ years<br>(n=10634) |       |
|-----------------------------|------------------------|-------|--------------------------|-------|---------------------------|-------|---------------------------|-------|---------------------------|-------|--------------------------|-------|------------------------|-------|
| <i>BMI† class</i>           |                        |       |                          |       |                           |       |                           |       |                           |       |                          |       |                        |       |
| <18.5 kg/m <sup>2</sup>     | 135                    | 5.6%  | 1815                     | 6.1%  | 7650                      | 4.1%  | 7509                      | 2.5%  | 3847                      | 1.9%  | 918                      | 1.5%  | 133                    | 1.3%  |
| 18.5-24.9 kg/m <sup>2</sup> | 1352                   | 56.5% | 16823                    | 56.4% | 104600                    | 56.3% | 180163                    | 59.9% | 122571                    | 59.5% | 34439                    | 54.5% | 5381                   | 50.1% |
| 25.0-29.9 kg/m <sup>2</sup> | 315                    | 13.2% | 4687                     | 15.7% | 33961                     | 18.3% | 53896                     | 17.9% | 37234                     | 18.1% | 13310                    | 21.1% | 2442                   | 23.0% |
| 30.0-34.9 kg/m <sup>2</sup> | 81                     | 3.4%  | 1327                     | 4.5%  | 10550                     | 5.7%  | 14401                     | 4.8%  | 9389                      | 4.6%  | 3575                     | 5.7%  | 683                    | 6.4%  |
| 35.0-39.9 kg/m <sup>2</sup> | 11                     | 0.5%  | 337                      | 1.1%  | 3013                      | 1.6%  | 4070                      | 1.4%  | 2724                      | 1.3%  | 1024                     | 1.6%  | 188                    | 1.8%  |
| ≥ 40.0 kg/m <sup>2</sup>    | 4                      | 0.2%  | 87                       | 0.3%  | 904                       | 0.5%  | 1312                      | 0.4%  | 944                       | 0.5%  | 342                      | 0.5%  | 68                     | 0.6%  |
| Missing data                | 494                    | 20.7% | 4740                     | 15.9% | 25264                     | 13.6% | 39471                     | 13.1% | 29196                     | 14.2% | 9555                     | 15.1% | 1739                   | 16.4% |
| <i>Smoking†</i>             |                        |       |                          |       |                           |       |                           |       |                           |       |                          |       |                        |       |
| Yes                         | 666                    | 27.8% | 9012                     | 30.2% | 31675                     | 17.0% | 24676                     | 8.2%  | 13971                     | 6.8%  | 5287                     | 8.4%  | 958                    | 9.0%  |
| No                          | 1542                   | 64.5% | 19154                    | 64.3% | 145695                    | 78.4% | 261348                    | 86.9% | 178792                    | 86.8% | 53416                    | 84.6% | 8883                   | 83.5% |
| Missing data                | 184                    | 7.7%  | 1650                     | 5.5%  | 8572                      | 4.6%  | 14798                     | 4.9%  | 13142                     | 6.4%  | 4460                     | 7.0%  | 793                    | 7.5%  |
| <i>Gestational age</i>      |                        |       |                          |       |                           |       |                           |       |                           |       |                          |       |                        |       |
| Information available       | 2368                   | 99.0% | 29715                    | 99.7% | 185700                    | 99.9% | 300603                    | 99.9% | 205719                    | 99.9% | 63098                    | 99.9% | 10620                  | 99.9% |
| Missing data                | 24                     | 1.0%  | 101                      | 0.3%  | 242                       | 0.1%  | 219                       | 0.1%  | 186                       | 0.1%  | 65                       | 0.1%  | 14                     | 0.1%  |

Figures denote counts and proportions.

BMI = body mass index.

† Reported height, weight and smoking habits at first antenatal visit.

Table 2. Obstetric and neonatal outcome characteristics of primiparous women with singleton births in the period 1992-2010.

| Characteristics                                              | Age groups             |       |                          |       |                           |       |                           |       |                           |       |                          |       |                        |       |
|--------------------------------------------------------------|------------------------|-------|--------------------------|-------|---------------------------|-------|---------------------------|-------|---------------------------|-------|--------------------------|-------|------------------------|-------|
|                                                              | < 17 years<br>(n=2392) |       | 17-19 years<br>(n=29816) |       | 20-24 years<br>(n=185942) |       | 25-29 years<br>(n=300822) |       | 30-34 years<br>(n=205905) |       | 35-39 years<br>(n=63163) |       | 40+ years<br>(n=10634) |       |
| <i>Labour:</i>                                               |                        |       |                          |       |                           |       |                           |       |                           |       |                          |       |                        |       |
| Spontaneous onset labour                                     | 2055                   | 85.9% | 25853                    | 86.7% | 158879                    | 85.4% | 251340                    | 83.6% | 163876                    | 79.6% | 45330                    | 71.2% | 6261                   | 58.9% |
| Induced labour                                               | 184                    | 7.7%  | 2528                     | 8.5%  | 17433                     | 9.4%  | 30873                     | 10.3% | 25474                     | 12.4% | 10065                    | 15.9% | 2111                   | 19.9% |
| <i>Mode of delivery:</i>                                     |                        |       |                          |       |                           |       |                           |       |                           |       |                          |       |                        |       |
| Normal vaginal birth                                         | 2030                   | 84.9% | 25096                    | 84.2% | 147082                    | 79.1% | 219993                    | 73.1% | 135099                    | 65.6% | 35112                    | 55.6% | 4724                   | 44.4% |
| Forceps                                                      | 7                      | 0.3%  | 126                      | 0.4%  | 1143                      | 0.6%  | 2166                      | 0.7%  | 1515                      | 0.7%  | 575                      | 0.9%  | 84                     | 0.8%  |
| Vacuum extraction                                            | 143                    | 6.0%  | 2090                     | 7.0%  | 18011                     | 9.7%  | 36696                     | 12.2% | 29811                     | 14.5% | 10119                    | 16.0% | 1599                   | 15.0% |
| CS*                                                          | 213                    | 8.9%  | 2500                     | 8.4%  | 19747                     | 10.6% | 42044                     | 14.0% | 39534                     | 19.2% | 17355                    | 27.5% | 4226                   | 39.7% |
| CS elective 1999-2010 †                                      | 53                     | 2.2%  | 373                      | 1.3%  | 2828                      | 1.5%  | 6973                      | 2.3%  | 7656                      | 3.7%  | 3853                     | 6.1%  | 1132                   | 10.6% |
| CS acute 1999-2010 †                                         | 73                     | 3.1%  | 882                      | 3.0%  | 7092                      | 3.8%  | 16651                     | 5.5%  | 17953                     | 8.7%  | 7826                     | 12.4% | 1798                   | 16.9% |
| <i>Gestational age:</i>                                      |                        |       |                          |       |                           |       |                           |       |                           |       |                          |       |                        |       |
| GA < 28 weeks                                                | 20                     | 0.8%  | 107                      | 0.4%  | 464                       | 0.2%  | 743                       | 0.2%  | 640                       | 0.3%  | 292                      | 0.5%  | 73                     | 0.7%  |
| GA < 32 weeks                                                | 40                     | 1.7%  | 308                      | 1.0%  | 1436                      | 0.8%  | 2415                      | 0.8%  | 2048                      | 1.0%  | 900                      | 1.4%  | 206                    | 1.9%  |
| GA < 37 weeks                                                | 213                    | 8.9%  | 1937                     | 6.5%  | 11030                     | 5.9%  | 18005                     | 5.6%  | 12727                     | 6.2%  | 4586                     | 7.3%  | 877                    | 8.2%  |
| GA 37 – 41 weeks                                             | 1990                   | 83.2% | 25811                    | 86.6% | 161043                    | 86.6% | 257320                    | 85.5% | 172621                    | 83.8% | 51494                    | 81.5% | 8786                   | 82.6% |
| GA ≥ 42 weeks                                                | 165                    | 6.9%  | 1967                     | 6.6%  | 13627                     | 7.3%  | 25278                     | 8.4%  | 20371                     | 9.9%  | 7018                     | 11.1% | 957                    | 9.0%  |
| <i>Maternal complications and use of epidural analgesia:</i> |                        |       |                          |       |                           |       |                           |       |                           |       |                          |       |                        |       |
| Perineal laceration gr 1-2*                                  | 311                    | 14.3% | 3982                     | 14.6% | 32602                     | 19.6% | 70452                     | 27.3% | 55163                     | 33.2% | 15477                    | 33.9% | 2116                   | 33.1% |
| Perineal laceration gr 3-4*                                  | 23                     | 1.1%  | 272                      | 1.0%  | 3030                      | 1.8%  | 8202                      | 3.2%  | 6846                      | 4.1%  | 1856                     | 4.1%  | 222                    | 3.5%  |
| Preeclampsia                                                 | 43                     | 1.8%  | 576                      | 1.9%  | 4317                      | 2.3%  | 6520                      | 2.2%  | 4265                      | 2.1%  | 1610                     | 2.5%  | 365                    | 3.4%  |
| Abruptio placentae                                           | 16                     | 0.7%  | 135                      | 0.5%  | 643                       | 0.3%  | 1171                      | 0.4%  | 955                       | 0.5%  | 390                      | 0.6%  | 87                     | 0.8%  |
| Placenta previa                                              | 2                      | 0.1%  | 16                       | 0.1%  | 159                       | 0.1%  | 505                       | 0.2%  | 612                       | 0.3%  | 375                      | 0.6%  | 89                     | 0.8%  |
| PPH > 1000 ml (VB)                                           | 65                     | 3.0%  | 667                      | 2.4%  | 5078                      | 3.1%  | 10931                     | 4.2%  | 9720                      | 5.9%  | 3173                     | 6.9%  | 485                    | 7.6%  |
| PPH > 1000 ml (CS)                                           | 2                      | 0.9%  | 28                       | 1.1%  | 252                       | 1.3%  | 541                       | 1.3%  | 578                       | 1.5%  | 237                      | 1.4%  | 80                     | 1.9%  |
| Epidural analgesia*                                          | 903                    | 41.4% | 11569                    | 42.4% | 68332                     | 41.1% | 105266                    | 40.7% | 70691                     | 42.5% | 20151                    | 44.0% | 2743                   | 42.9% |

Table 2 continued. Obstetric and neonatal outcome characteristics of primiparous women with singleton births in the period 1992-2010.

| Characteristics        | Age groups             |      |                          |      |                           |      |                           |      |                           |      |                          |      |                        |      |
|------------------------|------------------------|------|--------------------------|------|---------------------------|------|---------------------------|------|---------------------------|------|--------------------------|------|------------------------|------|
|                        | < 17 years<br>(n=2392) |      | 17-19 years<br>(n=29816) |      | 20-24 years<br>(n=185942) |      | 25-29 years<br>(n=300822) |      | 30-34 years<br>(n=205905) |      | 35-39 years<br>(n=63163) |      | 40+ years<br>(n=10634) |      |
| <i>Neonatal</i>        |                        |      |                          |      |                           |      |                           |      |                           |      |                          |      |                        |      |
| Foetal distress        | 8                      | 0.3% | 122                      | 0.4% | 932                       | 0.5% | 1621                      | 0.5% | 1070                      | 0.5% | 388                      | 0.6% | 56                     | 0.5% |
| Aspiration of meconium | 0                      | 0%   | 30                       | 0.1% | 363                       | 0.2% | 649                       | 0.2% | 563                       | 0.3% | 193                      | 0.3% | 42                     | 0.4% |
| Shoulder dystocia      | 6                      | 0.3% | 78                       | 0.3% | 793                       | 0.4% | 1580                      | 0.5% | 1382                      | 0.7% | 489                      | 0.8% | 79                     | 0.7% |
| Stillbirth             | 7                      | 0.3% | 102                      | 0.3% | 571                       | 0.3% | 893                       | 0.3% | 768                       | 0.4% | 347                      | 0.5% | 87                     | 0.8% |
| SGA                    | 91                     | 3.8% | 1136                     | 3.8% | 6016                      | 3.2% | 8831                      | 2.9% | 7216                      | 3.5% | 2962                     | 4.7% | 617                    | 5.8% |
| LGA                    | 47                     | 2.0% | 539                      | 1.8% | 3838                      | 2.1% | 5943                      | 2.0% | 3846                      | 1.9% | 1279                     | 2.0% | 224                    | 2.1% |
| Apgar score < 7 at 5   | 43                     | 1.8% | 381                      | 1.3% | 2409                      | 1.3% | 4158                      | 1.4% | 3354                      | 1.6% | 1274                     | 2.0% | 240                    | 2.3% |
| Birth weight (gram)    | 3348                   | 592  | 3403                     | 565  | 3453                      | 554  | 3470                      | 555  | 3452                      | 572  | 3415                     | 612  | 3360                   | 640  |

Figures denote counts and proportions or mean and one standard deviation.

BMI = body mass index; CS = caesarean section; GA = gestational age at birth; LGA = large for gestational age; PPH = postpartum haemorrhage; SGA = small for gestational age; VB = vaginal birth

‡All CS independent of status of performance – acute or elective. †Caesarean section was subdivided into elective and acute CS from 1999.

\*Epidural analgesia and perineal lacerations in vaginal births only.

Table 1. Demographic and descriptive obstetric characteristics of primiparous women with singleton births in the period 1992-2010.

| Characteristics                         | Age-groups            |       |                          |       |                           |       |                           |       |                           |       |                          |       |                        |       |
|-----------------------------------------|-----------------------|-------|--------------------------|-------|---------------------------|-------|---------------------------|-------|---------------------------|-------|--------------------------|-------|------------------------|-------|
|                                         | <17 years<br>(n=2392) |       | 17-19 years<br>(n=29816) |       | 20-24 years<br>(n=185942) |       | 25-29 years<br>(n=300822) |       | 30-34 years<br>(n=205905) |       | 35-39 years<br>(n=63163) |       | 40+ years<br>(n=10634) |       |
| BMI (kg/m <sup>2</sup> ) <sup>†</sup>   | 22.8                  | 3.7   | 23.2                     | 4.1   | 23.8                      | 4.3   | 23.7                      | 4.0   | 23.8                      | 4.0   | 24.4                     | 4.1   | 24.7                   | 4.3   |
| Smoking <sup>†</sup>                    | 666                   | 27.8% | 9012                     | 30.2% | 31675                     | 17.0% | 24676                     | 8.2%  | 13971                     | 6.8%  | 5287                     | 8.4%  | 958                    | 9.0%  |
| Spontaneous onset labour                | 2055                  | 85.9% | 25853                    | 86.7% | 158879                    | 85.4% | 251340                    | 83.6% | 163876                    | 79.6% | 45330                    | 71.2% | 6261                   | 58.9% |
| Induced labour                          | 184                   | 7.7%  | 2528                     | 8.5%  | 17433                     | 9.4%  | 30873                     | 10.3% | 25474                     | 12.4% | 10065                    | 15.9% | 2111                   | 19.9% |
| Normal vaginal delivery                 | 2030                  | 84.9% | 25096                    | 84.2% | 147082                    | 79.1% | 219993                    | 73.1% | 135099                    | 65.6% | 35112                    | 55.6% | 4724                   | 44.4% |
| Forceps                                 | 7                     | 0.3%  | 126                      | 0.4%  | 1143                      | 0.6%  | 2166                      | 0.7%  | 1515                      | 0.7%  | 575                      | 0.9%  | 84                     | 0.8%  |
| Vacuum extraction                       | 143                   | 6.0%  | 2090                     | 7.0%  | 18011                     | 9.7%  | 36696                     | 12.2% | 29811                     | 14.5% | 10119                    | 16.0% | 1599                   | 15.0% |
| CS <sup>*</sup>                         | 213                   | 8.9%  | 2500                     | 8.4%  | 19747                     | 10.6% | 42044                     | 14.0% | 39534                     | 19.2% | 17355                    | 27.5% | 4226                   | 39.7% |
| CS elective 1999-2010 <sup>‡</sup>      | 53                    | 2.2%  | 373                      | 1.3%  | 2828                      | 1.5%  | 6973                      | 2.3%  | 7656                      | 3.7%  | 3853                     | 6.1%  | 1132                   | 10.6% |
| CS acute 1999-2010 <sup>‡</sup>         | 73                    | 3.1%  | 882                      | 3.0%  | 7092                      | 3.8%  | 16651                     | 5.5%  | 17953                     | 8.7%  | 7826                     | 12.4% | 1798                   | 16.9% |
| GA <28 weeks                            | 20                    | 0.8%  | 107                      | 0.4%  | 464                       | 0.2%  | 743                       | 0.2%  | 640                       | 0.3%  | 292                      | 0.5%  | 73                     | 0.7%  |
| GA <32 weeks                            | 40                    | 1.7%  | 308                      | 1.0%  | 1436                      | 0.8%  | 2415                      | 0.8%  | 2048                      | 1.0%  | 900                      | 1.4%  | 206                    | 1.9%  |
| GA <37 weeks                            | 213                   | 8.9%  | 1937                     | 6.5%  | 11030                     | 5.9%  | 18005                     | 5.6%  | 12727                     | 6.2%  | 4586                     | 7.3%  | 877                    | 8.2%  |
| GA 37-41 weeks                          | 1990                  | 83.2% | 25811                    | 86.6% | 161043                    | 86.6% | 257320                    | 85.5% | 172621                    | 83.8% | 51494                    | 81.5% | 8786                   | 82.6% |
| GA ≥42 weeks                            | 165                   | 6.9%  | 1967                     | 6.6%  | 13627                     | 7.3%  | 25278                     | 8.4%  | 20371                     | 9.9%  | 7018                     | 11.1% | 957                    | 9.0%  |
| Epidural analgesia <sup>*</sup>         | 903                   | 41.4% | 11569                    | 42.4% | 68332                     | 41.1% | 105266                    | 40.7% | 70691                     | 42.5% | 20151                    | 44.0% | 2743                   | 42.9% |
| Perineal laceration gr 1-2 <sup>*</sup> | 311                   | 14.3% | 3982                     | 14.6% | 32602                     | 19.6% | 70452                     | 27.3% | 55163                     | 33.2% | 15477                    | 33.9% | 2116                   | 33.1% |
| Perineal laceration gr 3-4 <sup>*</sup> | 23                    | 1.1%  | 272                      | 1.0%  | 3030                      | 1.8%  | 8202                      | 3.2%  | 6846                      | 4.1%  | 1856                     | 4.1%  | 222                    | 3.5%  |
| Preeclampsia                            | 43                    | 1.8%  | 576                      | 1.9%  | 4317                      | 2.3%  | 6520                      | 2.2%  | 4265                      | 2.1%  | 1610                     | 2.5%  | 365                    | 3.4%  |
| Abruptio placentae                      | 16                    | 0.7%  | 135                      | 0.5%  | 643                       | 0.3%  | 1171                      | 0.4%  | 955                       | 0.5%  | 390                      | 0.6%  | 87                     | 0.8%  |
| Placenta previa                         | 2                     | 0.1%  | 16                       | 0.1%  | 159                       | 0.1%  | 505                       | 0.2%  | 612                       | 0.3%  | 375                      | 0.6%  | 89                     | 0.8%  |
| Bleeding >1000 ml (VD)                  | 65                    | 3.0%  | 667                      | 2.4%  | 5078                      | 3.1%  | 10931                     | 4.2%  | 9720                      | 5.9%  | 3173                     | 6.9%  | 485                    | 7.6%  |

|                         |   |      |    |      |     |      |     |      |     |      |     |      |    |      |
|-------------------------|---|------|----|------|-----|------|-----|------|-----|------|-----|------|----|------|
| Bleeding > 1000 ml (CS) | 2 | 0.9% | 28 | 1.1% | 252 | 1.3% | 544 | 1.3% | 578 | 1.5% | 237 | 1.4% | 80 | 1.9% |
|-------------------------|---|------|----|------|-----|------|-----|------|-----|------|-----|------|----|------|

Figures denote means and one standard deviation or counts and proportions.  
 BMI = body mass index; CS = caesarean section; GA = gestational age at delivery; VD = vaginal delivery  
 † Reported height, weight and smoking habits at first antenatal visit. \*All CS independent of status of performance—acute or elective.  
 \*Epidural analgesia and perineal lacerations in vaginal deliveries. †Caesarean section was subdivided into elective and acute CS from 1999.

Table 2: Descriptive neonatal outcome among primiparous women with singleton births in the period 1992–2010.

| Characteristics              | Age groups            |      |                          |      |                           |      |                           |      |                           |      |                          |      |                        |      |
|------------------------------|-----------------------|------|--------------------------|------|---------------------------|------|---------------------------|------|---------------------------|------|--------------------------|------|------------------------|------|
|                              | <17 years<br>(n=2392) |      | 17–19 years<br>(n=29816) |      | 20–24 years<br>(n=185942) |      | 25–29 years<br>(n=300822) |      | 30–34 years<br>(n=205905) |      | 35–39 years<br>(n=63163) |      | 40+ years<br>(n=10634) |      |
| Birth weight (gram)          | 3348                  | 592  | 3403                     | 565  | 3453                      | 554  | 3470                      | 555  | 3452                      | 572  | 3415                     | 612  | 3360                   | 640  |
| Foetal distress              | 8                     | 0.3% | 122                      | 0.4% | 932                       | 0.5% | 1621                      | 0.5% | 1070                      | 0.5% | 388                      | 0.6% | 56                     | 0.5% |
| Aspiration of meconium       | 0                     | 0%   | 30                       | 0.1% | 363                       | 0.2% | 649                       | 0.2% | 563                       | 0.3% | 193                      | 0.3% | 42                     | 0.4% |
| Shoulder dystocia            | 6                     | 0.3% | 78                       | 0.3% | 793                       | 0.4% | 1580                      | 0.5% | 1382                      | 0.7% | 489                      | 0.8% | 79                     | 0.7% |
| Stillbirth                   | 7                     | 0.3% | 102                      | 0.3% | 571                       | 0.3% | 893                       | 0.3% | 768                       | 0.4% | 347                      | 0.5% | 87                     | 0.8% |
| SGA                          | 91                    | 3.8% | 1136                     | 3.8% | 6016                      | 3.2% | 8831                      | 2.9% | 7216                      | 3.5% | 2962                     | 4.7% | 617                    | 5.8% |
| LGA                          | 47                    | 2.0% | 539                      | 1.8% | 3838                      | 2.1% | 5943                      | 2.0% | 3846                      | 1.9% | 1279                     | 2.0% | 224                    | 2.1% |
| Apgar score < 7 at 5 minutes | 43                    | 1.8% | 381                      | 1.3% | 2409                      | 1.3% | 4158                      | 1.4% | 3354                      | 1.6% | 1274                     | 2.0% | 240                    | 2.3% |

Figures denote means and one standard deviation or counts and proportions.  
 LGA = Large for gestational age; SGA = Small for gestational age

1  
2  
3  
4  
5  
6  
7  
8 | The crude odds rates and the results of the multivariate analyses models of obstetric and neonatal  
9 outcomes are shown in Table 3 and 4, respectively.  
10  
11  
12  
13  
14  
15  
16  
17  
18  
19  
20  
21  
22  
23  
24  
25  
26  
27  
28  
29  
30  
31  
32  
33  
34  
35  
36  
37  
38  
39  
40  
41  
42  
43  
44  
45  
46  
47  
48  
49  
50  
51  
52  
53  
54  
55  
56  
57  
58  
59  
60

Table 3. Obstetric outcome data in singleton primiparous women in the period 1992-2010 in relation to maternal age group.

| Characteristics          | Crude OR (95%CI)     | aOR (95%CI)†     | Crude OR (95%CI)     | aOR (95%CI)†     | Crude OR (95%CI)   | aOR (95%CI)†     |
|--------------------------|----------------------|------------------|----------------------|------------------|--------------------|------------------|
| <i>Labour</i>            | <i>&lt; 17 years</i> |                  | <i>17-19 years</i>   |                  | <i>20-24 years</i> |                  |
| Spontaneous onset labour | 1.20 (1.07-1.35)     | 1.20 (1.05-1.37) | 1.28 (1.24-1.33)     | 1.26 (1.21-1.31) | 1.16 (1.14-1.17)   | 1.16 (1.14-1.18) |
| Induced labour           | 0.73 (0.63-0.85)     | 0.78 (0.66-0.93) | 0.81 (0.78-0.85)     | 0.86 (0.82-0.90) | 0.90 (0.89-0.92)   | 0.91 (0.90-0.93) |
|                          | <i>30 - 34 years</i> |                  | <i>35 - 39 years</i> |                  | <i>40+ years</i>   |                  |
| Spontaneous onset labour | 0.77 (0.76-0.78)     | 0.78 (0.77-0.79) | 0.50 (0.49-0.51)     | 0.52 (0.51-0.54) | 0.29 (0.26-0.30)   | 0.30 (0.28-0.31) |
| Induced labour           | 1.23 (1.21-1.26)     | 1.19 (1.17-1.21) | 1.66 (1.62-1.70)     | 1.54 (1.50-1.58) | 2.17 (2.06-2.27)   | 1.97 (1.87-2.08) |
| <i>Mode of delivery</i>  | <i>&lt; 17 years</i> |                  | <i>17-19 years</i>   |                  | <i>20-24 years</i> |                  |
| Normal vaginal birth     | 2.05 (1.84-2.30)     | 2.04 (1.79-2.32) | 1.95 (1.89-2.02)     | 1.95 (1.88-2.02) | 1.39 (1.37-1.41)   | 1.39 (1.37-1.41) |
| Forceps‡                 | 0.38 (0.18-0.81)     | 0.41 (0.18-0.92) | 0.55 (0.46-0.64)     | 0.48 (0.39-0.59) | 0.82 (0.76-0.88)   | 0.77 (0.71-0.84) |
| Vacuum extraction‡       | 0.42 (0.36-0.51)     | 0.43 (0.36-0.52) | 0.50 (0.48-0.53)     | 0.50 (0.48-0.53) | 0.74 (0.72-0.75)   | 0.74 (0.72-0.75) |
| CS. all                  | 0.60 (0.52-0.69)     | 0.57 (0.48-0.67) | 0.56 (0.54-0.69)     | 0.55 (0.53-0.58) | 0.73 (0.72-0.74)   | 0.72 (0.71-0.74) |
| CS elective 1999-2010 ‡  | 0.95 (0.73-1.25)     | 0.83 (0.60-1.14) | 0.53 (0.48-0.59)     | 0.53 (0.47-0.60) | 0.65 (0.62-0.68)   | 0.68 (0.65-0.71) |
| CS acute 1999-2010 ‡     | 0.54 (0.43-0.68)     | 0.53 (0.40-0.69) | 0.52 (0.49-0.56)     | 0.56 (0.52-0.61) | 0.68 (0.66-0.70)   | 0.71 (0.69-0.73) |
|                          | <i>30 - 34 years</i> |                  | <i>35 - 39 years</i> |                  | <i>40+ years</i>   |                  |
| Normal vaginal delivery  | 0.70 (0.69-0.71)     | 0.72 (0.71-0.73) | 0.46 (0.45-0.47)     | 0.48 (0.47-0.49) | 0.29 (0.28-0.31)   | 0.31 (0.30-0.32) |
| Forceps‡                 | 1.08 (1.01-1.15)     | 1.20 (1.12-1.29) | 1.48 (1.35-1.63)     | 1.66 (1.49-1.84) | 1.58 (1.27-1.98)   | 1.75 (1.37-2.24) |
| Vacuum extraction‡       | 1.32 (1.30-1.34)     | 1.29 (1.27-1.32) | 1.72 (1.67-1.76)     | 1.67 (1.63-1.72) | 2.01 (1.90-2.13)   | 1.92 (1.80-2.04) |
| CS. all                  | 1.46 (1.44-1.49)     | 1.44 (1.42-1.47) | 2.34 (2.29-2.38)     | 2.21 (2.16-2.26) | 4.07 (3.91-4.23)   | 3.78 (3.61-3.96) |
| CS elective 1999-2010 ‡  | 1.63 (1.57-1.68)     | 1.44 (1.39-1.49) | 2.74 (2.63-2.85)     | 2.25 (2.15-2.35) | 5.03 (4.70-5.36)   | 3.89 (3.61-4.20) |
| CS acute 1999-2010 ‡     | 1.63 (1.59-1.67)     | 1.44 (1.40-1.47) | 2.41 (2.35-2.48)     | 1.94 (1.88-2.00) | 3.47 (3.29-3.66)   | 2.68 (2.52-2.85) |
| <i>Gestational age</i>   | <i>&lt; 17 years</i> |                  | <i>17-19 years</i>   |                  | <i>20-24 years</i> |                  |
| GA < 28 weeks            | 3.44 (2.20-5.37)     | 2.84 (1.59-5.06) | 1.46 (1.19-1.79)     | 1.25 (0.97-1.62) | 1.01 (0.90-1.14)   | 0.89 (0.77-1.02) |
| GA < 32 weeks            | 2.12 (1.55-2.91)     | 1.66 (1.10-2.51) | 1.29 (1.15-1.46)     | 1.20 (1.04-1.38) | 0.96 (0.90-1.03)   | 0.92 (0.85-0.99) |
| GA < 37 weeks            | 1.55 (1.34-1.79)     | 1.46 (1.24-1.72) | 1.09 (1.04-1.15)     | 1.03 (0.98-1.09) | 0.99 (0.97-1.02)   | 0.97 (0.95-1.00) |
| GA 37 – 41 weeks         | 0.89 (0.79-0.99)     | 0.88 (0.77-0.99) | 1.11 (1.07-1.15)     | 1.14 (1.09-1.18) | 1.10 (2.08-1.12)   | 1.12 (1.10-1.14) |
| GA ≥ 42 weeks            | 0.82 (0.70-0.96)     | 0.89 (0.75-1.06) | 0.77 (0.74-0.81)     | 0.79 (0.74-0.83) | 0.86 (0.84-0.88)   | 0.85 (0.83-0.87) |
|                          | <i>30 - 34 years</i> |                  | <i>35 - 39 years</i> |                  | <i>40+ years</i>   |                  |
| GA < 28 weeks            | 1.26 (1.13-1.40)     | 1.17 (1.04-1.33) | 1.88 (1.64-2.15)     | 1.61 (1.40-1.90) | 2.79 (2.19-3.56)   | 2.48 (1.86-3.29) |
| GA < 32 weeks            | 1.24 (1.17-1.32)     | 1.24 (1.16-1.33) | 1.79 (1.65-1.93)     | 1.68 (1.53-1.84) | 2.44 (2.12-2.82)   | 2.25 (1.90-2.66) |
| GA < 37 weeks            | 1.04 (1.01-1.06)     | 1.02 (0.99-1.05) | 1.23 (1.19-1.27)     | 1.19 (1.15-1.24) | 1.41 (1.32-1.52)   | 1.37 (1.26-1.48) |
| GA 37 – 41 weeks         | 0.88 (0.86-0.89)     | 0.89 (0.86-0.89) | 0.75 (0.73-0.76)     | 0.76 (0.74-0.78) | 0.81 (0.77-0.85)   | 0.83 (0.79-0.88) |
| GA ≥ 42 weeks            | 1.20 (1.17-1.22)     | 1.20 (1.18-1.23) | 1.36 (1.33-1.40)     | 1.35 (1.31-1.39) | 1.08 (1.01-1.15)   | 1.06 (0.98-1.14) |



Table 3 continued. Obstetric outcome data in singleton primiparous women in the period 1992-2010 in relation to maternal age group.

| Characteristics                                              | Crude OR (95%CI)     | aOR (95%CI)†     | Crude OR (95%CI)     | aOR (95%CI)†     | Crude OR (95%CI)   | aOR (95%CI)†     |
|--------------------------------------------------------------|----------------------|------------------|----------------------|------------------|--------------------|------------------|
| <i>Maternal complications and use of epidural analgesia:</i> |                      |                  |                      |                  |                    |                  |
|                                                              | <i>&lt; 17 years</i> |                  | <i>17-19 years</i>   |                  | <i>20-24 years</i> |                  |
| Perineal laceration grade 1-2‡                               | 0.44 (0.39-0.50)     | 0.44 (0.38-0.50) | 0.46 (0.44-0.47)     | 0.47 (0.45-0.49) | 0.65 (0.64-0.66)   | 0.68 (0.67-0.69) |
| Perineal laceration grade 3-4‡                               | 0.33 (0.22-0.49)     | 0.39 (0.25-0.60) | 0.31 (0.25-0.37)     | 0.37 (0.32-0.42) | 0.57 (0.54-0.59)   | 0.61 (0.58-0.64) |
| Preeclampsia                                                 | 0.83 (0.61-1.12)     | 0.89 (0.62-1.27) | 0.89 (0.82-0.97)     | 0.93 (0.84-1.02) | 1.07 (1.03-1.12)   | 1.01 (0.96-1.05) |
| Abruptio placentae                                           | 1.72 (1.05-2.83)     | 1.76 (1.03-3.00) | 1.16 (0.97-1.39)     | 1.02 (0.83-1.26) | 0.89 (0.81-0.98)   | 0.83 (0.74-0.92) |
| Placenta praevia                                             | 0.50 (0.12-2.00)     | 0.57 (0.14-2.30) | 0.32 (0.19-0.53)     | 0.28 (0.16-0.50) | 0.52 (0.43-0.61)   | 0.52 (0.43-0.63) |
| PPH > 1000 ml (VB)                                           | 0.70 (0.54-0.89)     | 0.65 (0.48-0.88) | 0.57 (0.53-0.61)     | 0.64 (0.59-0.70) | 0.71 (0.69-0.74)   | 0.78 (0.75-0.81) |
| PPH > 1000 ml (CS)                                           | 0.73 (0.18-2.93)     | 0.52 (0.07-3.74) | 0.87 (0.59-1.27)     | 1.16 (0.77-1.93) | 0.99 (0.92-1.07)   | 1.09 (0.93-1.28) |
| Epidural analgesia‡                                          | 1.03 (0.95-1.12)     | 1.03 (0.93-1.13) | 1.07 (1.06-1.08)     | 1.07 (1.04-1.10) | 1.02 (1.01-1.03)   | 1.03 (1.01-1.04) |
|                                                              | <i>30 - 34 years</i> |                  | <i>35 - 39 years</i> |                  | <i>40+ years</i>   |                  |
| Perineal laceration grade 1-2‡                               | 1.33 (1.31-1.34)     | 1.11 (1.10-1.13) | 1.37 (1.34-1.40)     | 1.08 (1.05-1.10) | 1.32 (1.25-1.39)   | 1.00 (0.94-1.07) |
| Perineal laceration grade 3-4‡                               | 1.31 (1.27-1.36)     | 1.16 (1.12-1.20) | 1.29 (1.23-1.36)     | 1.12 (1.05-1.18) | 1.10 (0.96-1.26)   | 0.88 (0.75-1.02) |
| Preeclampsia                                                 | 0.95 (0.92-0.99)     | 1.07 (1.03-1.12) | 1.18 (1.12-1.25)     | 1.30 (1.22-1.39) | 1.60 (1.44-1.79)   | 1.83 (1.62-2.06) |
| Abruptio placentae                                           | 1.19 (1.09-1.30)     | 1.27 (1.16-1.40) | 1.59 (1.42-1.78)     | 1.71 (1.50-1.94) | 2.11 (1.70-2.63)   | 2.09 (1.62-2.71) |
| Placenta praevia                                             | 1.77 (1.58-1.99)     | 1.74 (1.53-2.00) | 3.55 (3.11-4.06)     | 3.47 (2.99-4.03) | 5.02 (4.00-6.29)   | 5.23 (4.08-6.70) |
| PPH > 1000 ml (VB)                                           | 1.41 (1.37-1.45)     | 1.27 (1.23-1.31) | 1.69 (1.62-1.76)     | 1.47 (1.40-1.53) | 1.86 (1.69-2.05)   | 1.48 (1.26-1.52) |
| PPH > 1000 ml (CS)                                           | 1.14 (1.01-1.28)     | 1.04 (0.91-1.18) | 1.06 (0.91-1.24)     | 0.95 (0.81-1.12) | 1.48 (1.17-1.88)   | 1.35 (1.05-1.73) |
| Epidural analgesia‡                                          | 1.08 (1.06-1.09)     | 1.03 (1.02-1.05) | 1.14 (1.12-1.17)     | 1.06 (1.04-1.09) | 1.10 (1.04-1.15)   | 0.98 (0.93-1.03) |

Reference group: Maternal age 25-29 years.

CI = confidence intervals; CS = Caesarean section; GA = gestational age at delivery; N/A = not applicable; aOR = adjusted odds ratio; PPH = postpartum haemorrhage; VD = vaginal birth.

† Adjusted for maternal BMI and smoking habits at first antenatal care visit and year of birth. CS and preeclampsia also adjusted for gestational age. \* Caesarean section was subdivided into elective and acute CS from 1999. ‡ Forceps, vacuum extraction, epidural analgesia and perineal lacerations among vaginally delivered women.

Table 3. Mode of delivery and obstetric data among primiparous women with singleton births in the period 1992–2010 in relation to maternal age group. Maternal age 25–29 was set as reference.

| Characteristics                            | Age groups               |                          |                          |                          |                          |                          |
|--------------------------------------------|--------------------------|--------------------------|--------------------------|--------------------------|--------------------------|--------------------------|
|                                            | <17 years                | 17–19 years              | 20–24 years              | 30–34 years              | 35–39 years              | 40+ years                |
|                                            | aOR (95%CI) <sup>†</sup> |
| Spontaneous-onset labour                   | 1.20 (1.05–1.37)         | 1.26 (1.21–1.31)         | 1.16 (1.14–1.18)         | 0.78 (0.77–0.79)         | 0.52 (0.51–0.54)         | 0.30 (0.28–0.31)         |
| Induced labour                             | 0.78 (0.66–0.93)         | 0.86 (0.82–0.90)         | 0.91 (0.90–0.93)         | 1.19 (1.17–1.21)         | 1.54 (1.50–1.58)         | 1.97 (1.87–2.08)         |
| Normal vaginal delivery                    | 2.04 (1.79–2.32)         | 1.95 (1.88–2.02)         | 1.39 (1.37–1.41)         | 0.72 (0.71–0.73)         | 0.48 (0.47–0.49)         | 0.31 (0.30–0.32)         |
| Forceps <sup>‡</sup>                       | 0.41 (0.18–0.92)         | 0.48 (0.39–0.59)         | 0.77 (0.71–0.84)         | 1.20 (1.12–1.29)         | 1.66 (1.49–1.84)         | 1.75 (1.37–2.24)         |
| Vacuum extraction <sup>‡</sup>             | 0.43 (0.36–0.52)         | 0.50 (0.48–0.53)         | 0.74 (0.72–0.75)         | 1.29 (1.27–1.32)         | 1.67 (1.63–1.72)         | 1.92 (1.80–2.04)         |
| CS, all                                    | 0.57 (0.48–0.67)         | 0.55 (0.53–0.58)         | 0.72 (0.71–0.74)         | 1.44 (1.42–1.47)         | 2.21 (2.16–2.26)         | 3.78 (3.61–3.96)         |
| CS-elective 1999–2010 <sup>‡</sup>         | 0.83 (0.60–1.14)         | 0.53 (0.47–0.60)         | 0.68 (0.65–0.71)         | 1.44 (1.39–1.49)         | 2.25 (2.15–2.35)         | 3.89 (3.61–4.20)         |
| CS-acute 1999–2010 <sup>‡</sup>            | 0.53 (0.40–0.69)         | 0.56 (0.52–0.61)         | 0.71 (0.69–0.73)         | 1.44 (1.40–1.47)         | 1.94 (1.88–2.00)         | 2.68 (2.52–2.85)         |
| GA < 28 weeks                              | 2.84 (1.59–5.06)         | 1.25 (0.97–1.62)         | 0.89 (0.77–1.02)         | 1.17 (1.04–1.33)         | 1.61 (1.40–1.90)         | 2.48 (1.86–3.29)         |
| GA < 32 weeks                              | 1.66 (1.10–2.51)         | 1.20 (1.04–1.38)         | 0.92 (0.85–0.99)         | 1.24 (1.16–1.33)         | 1.68 (1.53–1.84)         | 2.25 (1.90–2.66)         |
| GA < 37 weeks                              | 1.46 (1.24–1.72)         | 1.03 (0.98–1.09)         | 0.97 (0.95–1.00)         | 1.02 (0.99–1.05)         | 1.19 (1.15–1.24)         | 1.37 (1.26–1.48)         |
| GA 37–41 weeks                             | 0.88 (0.77–0.99)         | 1.14 (1.09–1.18)         | 1.12 (1.10–1.14)         | 0.89 (0.86–0.89)         | 0.76 (0.74–0.78)         | 0.83 (0.79–0.88)         |
| GA ≥ 42 weeks                              | 0.89 (0.75–1.06)         | 0.79 (0.74–0.83)         | 0.85 (0.83–0.87)         | 1.20 (1.18–1.23)         | 1.35 (1.31–1.39)         | 1.06 (0.98–1.14)         |
| Epidural analgesia <sup>‡</sup>            | 1.03 (0.93–1.13)         | 1.07 (1.04–1.10)         | 1.03 (1.01–1.04)         | 1.03 (1.02–1.05)         | 1.06 (1.04–1.09)         | 0.98 (0.93–1.03)         |
| Perineal laceration grade 1–2 <sup>‡</sup> | 0.44 (0.38–0.50)         | 0.47 (0.45–0.49)         | 0.68 (0.67–0.69)         | 1.11 (1.10–1.13)         | 1.08 (1.05–1.10)         | 1.00 (0.94–1.07)         |
| Perineal laceration grade 3–4 <sup>‡</sup> | 0.39 (0.25–0.60)         | 0.37 (0.32–0.42)         | 0.61 (0.58–0.64)         | 1.16 (1.12–1.20)         | 1.12 (1.05–1.18)         | 0.88 (0.75–1.02)         |
| Preeclampsia                               | 0.89 (0.62–1.27)         | 0.93 (0.84–1.02)         | 1.01 (0.96–1.05)         | 1.07 (1.03–1.12)         | 1.30 (1.22–1.39)         | 1.83 (1.62–2.06)         |
| Abruptio placentae                         | 1.76 (1.03–3.00)         | 1.02 (0.83–1.26)         | 0.83 (0.74–0.92)         | 1.27 (1.16–1.40)         | 1.71 (1.50–1.94)         | 2.09 (1.62–2.71)         |
| Placenta praevia                           | 0.57 (0.14–2.30)         | 0.28 (0.16–0.50)         | 0.52 (0.43–0.63)         | 1.74 (1.53–2.00)         | 3.47 (2.99–4.03)         | 5.23 (4.08–6.70)         |
| PPH > 1000 ml (VD)                         | 0.65 (0.48–0.88)         | 0.64 (0.59–0.70)         | 0.78 (0.75–0.81)         | 1.27 (1.23–1.31)         | 1.47 (1.40–1.53)         | 1.48 (1.26–1.52)         |
| PPH > 1000 ml (CS)                         | 0.52 (0.07–3.74)         | 1.16 (0.77–1.93)         | 1.09 (0.93–1.28)         | 1.04 (0.91–1.18)         | 0.95 (0.81–1.12)         | 1.35 (1.05–1.73)         |

CI = confidence intervals; CS = Caesarean section; GA = gestational age at delivery; N/A = not applicable; aOR = adjusted odds ratio; PPH = postpartum haemorrhage; VD = vaginal delivery.

<sup>†</sup> Adjusted for maternal BMI and smoking habits at first antenatal care visit and year of delivery. CS and preeclampsia also adjusted for gestational age.

<sup>‡</sup> Caesarean section was subdivided into elective and acute CS from 1999.

<sup>‡</sup> Forceps, vacuum extraction, epidural analgesia and perineal lacerations among vaginally delivered women.

Table 4. Neonatal outcome data in singleton primiparous women in the period 1992-2010 in relation to maternal age group.

| Characteristics              | Crude OR (95%CI) |                  | aOR (95%CI)†     |                  | Crude OR (95%CI) |                  | aOR (95%CI)†  |  |
|------------------------------|------------------|------------------|------------------|------------------|------------------|------------------|---------------|--|
|                              | < 17 years       |                  | 17-19 years      |                  | 20-24 years      |                  | 30 - 34 years |  |
| Foetal distress              | 0.62 (0.31-1.24) | 0.52 (0.22-1.26) | 0.76 (0.63-0.91) | 0.63 (0.51-0.79) | 0.93 (0.86-1.01) | 0.79 (0.72-0.91) |               |  |
| Aspiration of meconium       | N/A              | N/A              | 0.47 (0.32-0.67) | 0.46 (0.31-0.70) | 0.90 (0.80-1.03) | 0.93 (0.81-1.07) |               |  |
| Shoulder dystocia‡           | 0.45 (0.11-1.82) | 0.32(0.05-2.29)  | 0.74 (0.58-0.90) | 0.74 (0.52-1.07) | 1.01 (0.88-1.16) | 1.00 (0.86-1.16) |               |  |
| Stillbirth                   | 0.99 (0.47-2.08) | 0.58 (0.19-1.80) | 1.15 (0.94-1.42) | 0.97 (0.75-1.25) | 1.03 (0.93-1.15) | 0.98 (0.87-1.11) |               |  |
| SGA                          | 1.32 (1.07-1.63) | 1.00 (0.78-1.28) | 1.31 (1.23-1.40) | 1.01 (0.94-1.09) | 1.11 (1.07-1.14) | 1.00 (0.96-1.04) |               |  |
| LGA                          | 1.01 (0.75-1.34) | 1.08 (0.76-1.53) | 0.92 (0.84-1.00) | 1.03 (0.94-1.14) | 1.05 (1.00-1.09) | 1.05 (1.00-1.10) |               |  |
| Apgar score < 7 at 5 minutes | 1.31 (0.96-1.77) | 1.30 (0.91-1.86) | 0.92 (0.83-1.03) | 0.92 (0.81-1.11) | 0.93 (0.89-0.99) | 0.93 (0.88-0.98) |               |  |
|                              |                  |                  | 35 - 39 years    |                  | 40+ years        |                  |               |  |
| Foetal distress              | 0.96 (0.89-1.04) | 1.23 (1.13-1.35) | 1.14 (1.02-1.27) | 1.51 (1.33-1.72) | 0.98 (0.75-1.28) | 1.60 (1.20-2.13) |               |  |
| Aspiration of meconium       | 1.27 (1.13-1.42) | 1.36 (1.20-1.54) | 1.42 (1.21-1.67) | 1.48 (1.24-1.77) | 1.83 (1.34-2.51) | 1.82 (1.28-2.58) |               |  |
| Shoulder dystocia‡           | 1.18 (1.04-1.35) | 1.13 (0.90-1.41) | 1.13 (0.91-1.39) | 1.13 (0.91-1.41) | 1.47 (0.93-2.33) | 1.27 (0.76-2.12) |               |  |
| Stillbirth                   | 1.26 (1.14-1.38) | 1.25 (1.12-1.39) | 1.85 (1.64-2.10) | 1.72 (1.49-1.99) | 2.77 (2.22-3.46) | 2.34 (1.80-3.03) |               |  |
| SGA                          | 1.20 (1.16-1.24) | 1.24 (1.20-1.28) | 1.63 (1.56-1.70) | 1.65 (1.58-1.73) | 2.04 (1.87-2.22) | 2.06 (1.87-2.26) |               |  |
| LGA                          | 0.94 (0.91-0.98) | 0.94 (0.90-0.98) | 1.03 (0.97-1.09) | 0.97 (0.91-1.04) | 1.07 (0.93-1.22) | 0.94 (0.81-1.09) |               |  |
| Apgar score < 7 at 5 minutes | 1.18 (1.13-1.24) | 1.18 (1.12-1.24) | 1.47 (1.38-1.56) | 1.39 (1.29-1.49) | 1.65 (1.44-1.88) | 1.51 (1.30-1.75) |               |  |

Reference group: Maternal age 25-29 years.

CI = confidence interval; LGA = large for gestational age; N/A = not applicable; aOR = adjusted odds ratio; SGA = small for gestational age

† Adjusted for maternal BMI and smoking habits at first antenatal care visit and year of birth

‡ Shoulder dystocia among vaginal delivered women.

Table 4. Neonatal outcome data from singleton primiparous women in the period 1992-2010 in relation to maternal age group.

| Characteristic         | Age groups       |                  |                  |                  |                  |                  |
|------------------------|------------------|------------------|------------------|------------------|------------------|------------------|
|                        | <17 years        | 17-19 years      | 20-24 years      | 30-34 years      | 35-39 years      | 40+ years        |
|                        | aOR (95%CI)†     |
| Foetal distress        | 0.52 (0.22-1.26) | 0.63 (0.51-0.79) | 0.79 (0.72-0.91) | 1.23 (1.13-1.35) | 1.51 (1.33-1.72) | 1.60 (1.20-2.13) |
| Aspiration of meconium | N/A              | 0.46 (0.31-0.70) | 0.93 (0.81-1.07) | 1.36 (1.20-1.54) | 1.48 (1.24-1.77) | 1.82 (1.28-2.58) |
| Shoulder dystocia‡     | 0.32(0.05-2.29)  | 0.74 (0.52-1.07) | 1.00 (0.86-1.16) | 1.13 (0.90-1.41) | 1.13 (0.91-1.41) | 1.27 (0.76-2.12) |

1  
2  
3  
4  
5  
6  
7  
8  
9  
10  
11  
12  
13  
14  
15  
16  
17  
18  
19  
20  
21  
22  
23  
24  
25  
26  
27  
28  
29  
30  
31  
32  
33  
34  
35  
36  
37  
38  
39  
40  
41  
42  
43  
44  
45  
46  
47  
48  
49

|                              |                  |                  |                  |                  |                  |                  |
|------------------------------|------------------|------------------|------------------|------------------|------------------|------------------|
| Stillbirth                   | 0.58 (0.19-1.80) | 0.97 (0.75-1.25) | 0.98 (0.87-1.11) | 1.25 (1.12-1.39) | 1.72 (1.49-1.99) | 2.34 (1.80-3.03) |
| SGA                          | 1.00 (0.78-1.28) | 1.01 (0.94-1.09) | 1.00 (0.96-1.04) | 1.24 (1.20-1.28) | 1.65 (1.58-1.73) | 2.06 (1.87-2.26) |
| LGA                          | 1.08 (0.76-1.53) | 1.03 (0.94-1.14) | 1.05 (1.00-1.10) | 0.94 (0.90-0.98) | 0.97 (0.91-1.04) | 0.94 (0.81-1.09) |
| Apgar score < 7 at 5 minutes | 1.30 (0.91-1.86) | 0.92 (0.81-1.11) | 0.93 (0.88-0.98) | 1.18 (1.12-1.24) | 1.39 (1.29-1.49) | 1.51 (1.30-1.75) |

Figures denote odds ratios and 95% confidence intervals. Reference group: Maternal age 25-29 years.  
 LGA = Large for gestational age; N/A = not applicable; aOR = adjusted odds ratio; SGA = Small for gestational age  
 † Adjusted for maternal BMI and smoking habits at first antenatal care visit and year of delivery  
 ‡ Shoulder dystocia among vaginal delivered women.

peer review only

### ***Mode of delivery, obstetric and neonatal outcome of adolescents***

Compared with the reference group ~~of women age 25–29 years~~ the teenagers had a significantly higher likelihood of having spontaneous onset of labour and of having a normal vaginal delivery. Teenagers also demonstrated a significantly higher risk of giving birth prematurely. However, only the group of teenagers younger than 17 years of age had an increased risk of giving birth very prematurely i.e. before 28 weeks of gestational age, and the same group revealed a significantly higher risk of placental abruption. In contrast with these observations the teenagers were delivered instrumentally and by CS significantly less often, and the vaginal ~~deliveries~~ births caused significantly fewer perineal lacerations (only evaluated among women who delivered vaginally) and PPH > 1000 ml. Likewise the occurrence of placenta previa was seen less often among teenagers whereas the occurrence of preeclampsia was equal to that seen in ~~adult women age 25–29 years~~ the reference group.

Concerning the foetal and neonatal outcomes for adolescents the ~~infants~~ newborns were less likely to show foetal distress and meconium aspiration in spite of a similar occurrence of Apgar score < 7 at 5 minutes. The ~~infants~~ newborns of the adolescents were not more prone to being stillborn or being SGA than the ~~infants~~ newborns of women ~~age 25–29 years~~ in the reference group. The adjusted mean birth weight of ~~infants~~ newborns of adolescents did not differ significantly from that of women up to 29 years of age (Figure 21).

### ***Mode of delivery, obstetric and neonatal outcome of women 20–24 years of age***

The young women, 20 – 24 years of age, differed in some aspects from the reference group (~~25–29 years~~) as well as from the adolescents. They were less likely to be delivered prematurely and had a lower frequency of placental abruption. Otherwise the obstetric and neonatal outcomes were similarly favourable as those observed for the adolescents in comparison with the reference group.

### ***Mode of delivery, obstetric and neonatal outcome of women older than 29 years of age***

1  
2  
3  
4  
5  
6  
7  
8 24 | As shown in Table 3 compared with the reference group ~~of women age 25-29 years~~ almost all obstetric  
9  
10 25 | outcome variables demonstrated a continuously progressive deterioration with increasing age. The  
11 26 | likelihood of normal vaginal ~~births deliveries~~ decreased; induced labour, instrumental deliveries and  
12  
13 27 | CS increased as well as prematurity including very premature deliveries. The risk of perineal ~~damage~~  
14  
15 28 | ~~laceration~~ increased moderately whereas the risk of PPH > 1000 ml in vaginal ~~births deliveries~~ was  
16  
17 29 | more pronounced. The likelihood of the pregnancy complications preeclampsia, abruptio placenta and  
18  
19 30 | placenta previa was also higher in the older age groups and progressed substantially with increasing  
20  
21 31 | age. Similarly, the foetal and neonatal outcome was adversely progressively influenced by increasing  
22  
23 32 | maternal age. With increasing maternal age over 30 years significantly more neonates were SGA,  
24  
25 33 | showed foetal distress, had Apgar score < 7 at 5 minutes or meconium aspiration, or were stillborn. The  
26  
27 34 | mean birth weight of the neonates also decreased significantly with increasing maternal age after the  
28  
29 35 | age of 30 (Figure 1).  
30  
31  
32  
33  
34  
35  
36  
37  
38  
39  
40  
41  
42  
43  
44  
45  
46  
47  
48  
49  
50  
51  
52  
53  
54  
55  
56  
57  
58  
59  
60

## DISCUSSION

This Swedish nation-wide population-based study with prospectively collected data concerning singleton primiparous women showed that the mode of delivery differed over the maternal age strata. Significantly more normal vaginal deliveries and fewer CS and instrumental vaginal deliveries were seen among the teenagers and among women aged 20-24 compared with [the reference group of women aged 25-29](#). The opposite was found among older women reaching a 4-fold increased risk for CS compared with women aged 20-24. The teenagers as well as women aged 20-24 were less prone to perineal lacerations and PPH exceeding 1000 ml. Prematurity (< 28 weeks of GA) was associated with very low maternal age (<17 years) among the adolescents although the increased risk was at the same level as among women aged 40 years and above, indicating a u-shaped risk curve. Adolescents were not afflicted more by preeclampsia than [the reference women aged 25-29](#) whereas the risk of preeclampsia increased significantly with advancing maternal age. The risk of placenta praevia increased dramatically with maternal age, actually a 500% increased risk was found after the age of 40 compared with [women of 25-29 years of age the reference group. There was a significantly increased risk of stillbirth, SGA and low Apgar score only in women aged 30 years and over.](#)

~~The strength of this study is that it deals with the outcomes in the population of an entire country where the antenatal care program is equally available to all pregnant women and is comprehensive. In Sweden pregnant women have completely cost free access to antenatal and obstetric facilities; poverty and malnutrition are practically non-existent and the vast majority of women attends the antenatal care program (99%) independent of socio-economic status and is delivered in obstetric units.[26] This context is valid for the whole study period. Another advantage is the large number of individuals available for evaluation, which makes it possible to divide the study population into subgroups with sufficient numbers in each stratum to provide high statistical power. A sufficient number of study subjects made it possible to evaluate three subgroups of young maternal age. Only primiparous women were included in order to avoid the confounding effects of factors associated with subsequent~~

1  
2  
3  
4  
5  
6  
7  
8 62 ~~deliveries. There are some limitations that should be considered. The external validity is reduced to~~  
9  
10 63 ~~facilities with similar socio-economic and demographic characteristics and health care systems with~~  
11 64 ~~comparable standards. The drawback is obvious given the large size of the study and the numbers of~~  
12  
13 65 ~~health care units involved that the criteria for diagnosis (ICD codes) to define outcomes may not be~~  
14  
15 66 ~~uniform across the study population but the variation is most likely not related to maternal age. The~~  
16  
17 67 ~~MBR contain a large body of information concerning the mother and the child which made it possible~~  
18  
19 68 ~~to adjust the results for confounding factors. At the same time this is a limitation as only the data~~  
20  
21 69 ~~available in the register could be used for adjustments. We were not able to adjust for some putative~~  
22  
23 70 ~~confounders such as ethnicity, socio-economic status and medical conditions such as anemia in~~  
24  
25 71 ~~pregnancy. These factors may theoretically influence the outcomes.~~

26 72 The most prominent difference between [the](#) findings in the present study and earlier studies is that no  
27  
28 73 increased risk for SGA was found among [the](#) adolescents and young mothers 20-24 years of age  
29  
30 74 compared with [the reference](#) women ~~age 25-29~~. [8-9] It must be kept in mind that the definition of SGA  
31  
32 75 may differ between countries. In the United States and Latin America SGA is usually defined as birth  
33  
34 76 weight below the 10<sup>th</sup> percentile compared with two SD in the Nordic countries. [3, 9] Adjusted risks  
35  
36 77 for SGA among teenagers, recently presented from Finland, one of the Nordic countries, showed no  
37  
38 78 increased risk among the youngest mothers. [6] In that study the control group was defined in the same  
39  
40 79 way as in the present study. Differences concerning the risk for SGA could also be attributable to  
41  
42 80 differences in socio-economic status. Chen et al. restricted their analysis to white married mothers with  
43  
44 81 age-appropriate education level, adequate prenatal care, without smoking and alcohol use during  
45  
46 82 pregnancy but found the increased risk for SGA to persist. [3] Several studies have shown low infant  
47  
48 83 birth weight for adolescents as well as for mothers with advancing age. [18, 14, [26](#), [27](#)] We failed to  
49  
50 84 find such association among the adolescents, but in women with advancing age the difference in birth  
51  
52 85 weight was statistically significant although the difference lacked clinical significance.



1  
2  
3  
4  
5  
6  
7  
8 86 | The finding of a preferable [deliverybirth](#) outcome with lower CS rates and lower rates of instrumental  
9  
10 87 | delivery among teenagers compared with older women has been pinpointed to a lesser extent than  
11 88 | observed adverse outcomes. Earlier studies have shown relatively consistent results concerning a  
12  
13 89 | decreased rate of CS in the adolescent group and a higher rate in women with advancing age.[6, 8, 9,  
14  
15 90 | 12-18] We were able to evaluate elective and emergency CS separately and the risks among [the](#)  
16  
17 91 | teenagers and mothers age 20-24 years were decreased for both types. This might indicate that the  
18  
19 92 | different risks concerning CS among young and [older](#) mothers could not exclusively be explained by  
20  
21 93 | more CS on maternal request among older mothers but may even be caused by biological factors. A  
22  
23 94 | low rate of instrumental deliveries and CS among adolescents and [a](#) high rate among older women [have](#)  
24 95 | almost unanimously been shown in several reports from [high-income developed](#) as well as [low-income](#)  
25  
26 96 | [developing](#) countries.[5, 7, 12-18, [26-29](#)] Whether this phenomenon depends on differences in handling  
27  
28 97 | the delivery, inherent or cultural behavioural, domestic or social attitudes among [the obstetric](#) staff or  
29  
30 98 | biological factors has not been investigated. Advancing age is associated with [impaired uterine](#)  
31  
32 99 | [contractility as well as](#) endothelial dysfunction which theoretically may lead to impaired uterine and  
33  
34 100 | utero-placental -function.[[30, 31](#)] The fact that adolescents in our study had a lower risk of induction of  
35  
36 101 | labour, perineal [damage](#)laceration, PPH, abruption (except for the very young women) and placenta  
37  
38 102 | previa and women with advancing age had higher risks of all these outcomes including preeclampsia  
39  
40 103 | could support a biological explanation. Concerning prematurity the age related risk curve was U  
41  
42 104 | shaped. This may also support a biological aetiology; immaturity of the uterus in the very young  
43  
44 105 | women that obstruct development of a term pregnancy and uterine dysfunction caused by ageing  
45  
46 106 | processes in women with advancing age and consequently deliver prematurely in both situations. The  
47  
48 107 | neonatal outcomes followed almost the same pattern; foetal distress, meconium aspiration, stillbirth,  
49  
50 108 | SGA and low Apgar score were exclusively attributed to women older than 29.  
51  
52  
53  
54  
55  
56  
57  
58  
59  
60

1  
2  
3  
4  
5  
6  
7  
8 110 The strength of this study is that it deals with the outcomes in the population of an entire country where  
9  
10 111 the antenatal care program is equally available to all pregnant women and is comprehensive. In Sweden  
11 112 pregnant women have completely cost free access to antenatal and obstetric facilities; poverty and  
12  
13 113 malnutrition are practically non-existent and the vast majority of women attends the antenatal care  
14  
15 114 program (99%) independent of socio-economic status and is delivered in obstetric units.[21]. This  
16  
17 115 context is valid for the whole study period. Another advantage is the large number of individuals  
18  
19 116 available for evaluation, which makes it possible to divide the study population into subgroups with  
20  
21 117 sufficient numbers in each stratum to provide high statistical power. A sufficient number of study  
22  
23 118 subjects made it possible to evaluate three subgroups of young maternal age. Only primiparous women  
24  
25 119 were included in order to avoid the confounding effects of factors associated with subsequent  
26 120 deliveries. There are limitations that should be considered. The external validity is reduced to facilities  
27  
28 121 with similar socio-economic and demographic characteristics and health care systems with comparable  
29  
30 122 standards. The drawback is obvious given the large size of the study and the numbers of health care  
31  
32 123 units involved that the criteria for diagnosis (ICD codes) to define outcomes may not be uniform across  
33  
34 124 the study population but the variation is most likely not related to maternal age. The MBR contain a  
35 125 large body of information concerning the mother and the child which made it possible to adjust the  
36  
37 126 results for confounding factors. At the same time this is a limitation as only the data available in the  
38  
39 127 register could be used for adjustments. The register lacks information on ethnicity and socio-economic  
40  
41 128 status. Our effort was to evaluate obstetric and neonatal outcome in different maternal age groups  
42  
43 129 compared with women aged 25-29 overall. The only stratifications made were for year of birth,  
44  
45 130 maternal BMI and smoking in early pregnancy. The data on year of birth showed that there is  
46  
47 131 variability in the existence of obstetric and neonatal diagnoses during the observation period. This may  
48  
49 132 be due to true changes but may also be a result of changes in recording, including the expanding use of  
50 133 computerized medical records. It was therefore necessary to adjust for year of birth. Maternal BMI  
51  
52 134 affects obstetric and neonatal outcome.[32] To demonstrate causality between the different outcomes

Formatted

1  
2  
3  
4  
5  
6  
7  
8 135 evaluated in the analyses and maternal age a great number of putative intermediaries could have been  
9  
10 136 considered such as the use of fertility treatment, foetal size, gestational weight gain etc., but that was  
11 137 not the purpose of the study. A true confounder affects both the exposure and the outcome. There may  
12  
13 138 be other variables (which are not intermediaries) but we have not been able to identify them. If we take  
14  
15 139 for instance maternal hypertension -as an example, it could be of interest. But as the higher risk of  
16  
17 140 hypertension is a consequence of maternal age, it is not a true confounder but an intermediary, a way in  
18  
19 141 which high maternal age can affect obstetric and neonatal pathology.  
20  
21 142 Our approach of analysing the data may be a benefit for clinicians interpreting the results when dealing  
22  
23 143 with young and aged mothers.

24 144 In conclusion, in a country with a highly developed social and antenatal maternity health care security  
25  
26 145 system giving cost free maternity and obstetric care to all pregnant women adolescents had a decreased  
27  
28 146 risk for adverse obstetric and neonatal outcome compared with ~~women aged 25-29~~the reference group.  
29  
30 147 In the same social context childbirth at advanced maternal age was associated with a number of serious  
31  
32 148 complications for both the woman and the child. For clinicians counselling young mothers it is of great  
33  
34 149 importance to highlight the positive consequences that less obstetric complications and favourable  
35  
36 150 neonatal outcomes are expected. There is also a need ~~for more information about the consequences of~~  
37 151 ~~childbearing at advanced maternal age and~~ to develop surveillance programs in antenatal and obstetric  
38  
39 152 care ~~customized~~ for older women aiming to prevent and protect the increased risks of adverse outcomes  
40  
41 153 for example to earlier detect preeclampsia or recommending prophylactic uterotonic treatment after  
42  
43 154 birth to avoid extensive postpartum bleeding. Such interventions need to be evaluated in well-designed  
44  
45 155 prospective studies.

1  
2  
3  
4  
5  
6  
7  
8  
9  
10  
11  
12  
13  
14  
15  
16  
17  
18  
19  
20  
21  
22  
23  
24  
25  
26  
27  
28  
29  
30  
31  
32  
33  
34  
35  
36  
37  
38  
39  
40  
41  
42  
43  
44  
45  
46  
47  
48  
49  
50  
51  
52  
53  
54  
55  
56  
57  
58  
59  
60

157 **Funding:** The study was supported financially by grants from the County Council of Östergötland and  
158 Linköping University.

159 **Disclosure of interest:** None of the authors has any conflict of interest to declare.

160 **Contribution of authorship:** The study was planned and conducted by PK, MB and RBT, Data was  
161 analysed by all three. All authors contributed to the interpretation of the results, the elaboration of the  
162 manuscript and approval of the final version.

163 **Checklist:** The manuscript conforms to the STROBE requirement.

164 **Data sharing statement:** Technical appendix, statistical code, and dataset available from the  
165 corresponding author at Dryad repository, who will provide a permanent, citable and open access home  
166 for the dataset.

1  
2  
3  
4  
5  
6  
7  
8 167 **REFERENCE LIST**

- 9  
10 168 1. Olausson PM, Cnattingius S, Goldenberg RL. Determinants of poor pregnancy outcomes among  
11 169 teenagers in Sweden. *Obstet Gynecol* 1997;89:451-7.
- 12  
13 170 2. Olausson PO, Cnattingius S, Haglund B. Teenage pregnancies and risk of late fetal death and  
14 infant mortality. *Br J Obstet Gynaecol* 1999;106:116-21.
- 15 171  
16 172 3. Chen XK, Wen SW, Fleming N, et al. Teenage pregnancy and adverse birth outcomes: a large  
17 population based retrospective cohort study. *Int J Epidemiol* 2007;36:368-73.
- 18  
19 173  
20 174 4. Gupta N, Kiran U, Bhal K. Teenage pregnancies: obstetric characteristics and outcome. *Eur J*  
21 *Obstet Gynecol Reprod Biol* 2008;137:165-71.
- 22 175  
23 176 5. de Vienne CM, Creveuil C, Dreyfus M. Does young maternal age increase the risk of adverse  
24 obstetric, fetal and neonatal outcomes: a cohort study. *Eur J Obstet Gynecol Reprod Biol*  
25 2009;147:151-6.
- 26 177  
27 28 178 6. Leppälahti S, Gissler M, Mentula M, et al. Is teenage pregnancy an obstetric risk in a welfare  
29 society? A population-based study in Finland, from 2006 to 2011. *BMJ Open*  
30 2013;19:3:e003225.
- 31  
32 180  
33 181 7. Lao TT, Ho LF. Obstetric outcome of teenage pregnancies. *Hum Reprod* 1998;13:3228-32.
- 34  
35 182  
36 183 8. Malabarey OT, Balayla J, Klam SL, et al. Pregnancies in young adolescent mothers: a  
37 population-based study on 37 million births. *J Pediatr Adolesc Gynecol* 2012;25:98-102.
- 38  
39 184  
40 185 9. Conde-Agudelo A, Belizán JM, Lammers C. Maternal-perinatal morbidity and mortality  
41 associated with adolescent pregnancy in Latin America: Cross-sectional study. *Am J Obstet*  
42 *Gynecol* 2005;192:342-9.
- 43 186  
44 187 10. Mukhopadhyay P, Chaudhuri RN, Paul B. Hospital-based perinatal outcomes and complications  
45 in teenage pregnancy in India. *J Health Popul Nutr* 2010;28:494-500.
- 46 188  
47 189  
48 190 11. Ayuba II, Gani O. Outcome of teenage pregnancy in the niger delta of Nigeria. *Ethiop J Health*  
49 *Sci* 2012;22:45-50.
- 50  
51  
52 191  
53  
54  
55  
56  
57  
58  
59  
60

- 1  
2  
3  
4  
5  
6  
7  
8 192 12. Jolly M, Sebire N, Harris J, et al. The risks associated with pregnancy in women aged 35 years or  
9  
10 193 | older. *Hum Reprod* 2000;15:2433-7.  
11 194 13. Jacobsson B, Ladfors L, Milsom I. Advanced maternal age and adverse perinatal outcome. *Obstet*  
12  
13 195 | *Gynecol* 2004;104:727-33.  
14  
15 196 14. Cleary-Goldman J, Malone FD, Vidaver J, et al. Impact of maternal age on obstetric outcome.  
16  
17 197 | *Obstet Gynecol* 2005;105:983-90.  
18  
19 198 15. Joseph KS, Allen AC, Dodds L, et al. The perinatal effects of delayed child bearing. *Obstet*  
20  
21 199 | *Gynecol* 2005;105:1410-8.  
22 200 16. Luke B, Brown MB. Elevated risks of pregnancy complications and adverse outcomes with  
23  
24 201 | increasing maternal age. *Hum Reprod* 2007;22:1264-72.  
25  
26 202 17. Delbaere I, Verstraelen H, Goetgeluk S, et al. Pregnancy outcome in primiparae of advanced  
27  
28 203 | maternal age. *Eur J Obstet Gynecol Reprod Biol* 2007;135:41-6.  
29  
30 204 18. Hsieh TT, Liou JD, Hsu JJ, et al. Advanced maternal age and adverse perinatal outcomes in an  
31  
32 205 | Asian population. *Eur J Obstet Gynecol Reprod Biol* 2010;148:21-6.  
33  
34 206 19. Matsuda Y, Kawamichi Y, Hayashi K, et al. Impact of maternal age on the prevalence of  
35  
36 207 | obstetrical complications in Japan. *J Obstet Gynaecol Res* 2011;37:1409-14.  
37 208 20. Biro MA, Davey MA, Carolan M, et al. Advanced maternal age and obstetric morbidity for  
38  
39 209 | women giving birth in Victoria, Australia: A population-based study. *Aust N Z J Obstet*  
40  
41 210 | *Gynaecol* 2012;52:229-34.  
42  
43 211 21. [Lindmark G, Chattingius S. The scientific basis of antenatal care routines: Report from a state-of-](#)  
44  
45 212 | [art conference. \*Acta Obstet Gynecol Scand\* 1991;70:105-9.](#) [Haagesen KM, ed. \*Nordic Statistical\*](#)  
46  
47 213 | [Yearbook 2012. Vol. 50. ISBN 978-92-893-2350-5, ISSN 1398-0017.](#)  
48  
49 214 | <http://dx.doi.org/106027/Nord2012-001>.  
50 215 22. Källen B, Källen K, Olausson PO. The Swedish Medical Birth Register: a summary of content  
51  
52 216 | and quality. Research Report, Article no: 2003-112-3. Centre for Epidemiology, National Board  
53  
54  
55  
56  
57  
58  
59  
60

of Health and Welfare Stockholm 2003. Available from:

<http://www.socialstyrelsen.se/publikationer2003/2003-112-3> (Accessed May 2014.)

23. Cnattingius S, Ericson A, Gunnarskog J, et al. A quality study of a medical birth registry. *Scand J Soc Med* 1990;18:143–8.
24. Axelsson O. The Swedish medical birth register. *Acta Obstet Gynecol Scand* 2003;82:491.
25. Källén B. A birth weight for gestational age standard based on data in the Swedish Medical Birth Registry, 1985-1989. *Eur J Epidemiol* 1995;11:601-6.
- ~~26. Lindmark G, Cnattingius S. The scientific basis of antenatal care routines: Report from a state-of-art conference. *Acta Obstet Gynecol Scand* 1991;70:105-9.~~
- ~~27.~~ Shrim A, Ates S, Mallozzi A, et al. Is young maternal age really a risk factor for adverse pregnancy outcome in a Canadian tertiary referral hospital? *J Pediatr Adolesc Gynecol* 2011;24:218-22.
27. Jivraj S, Nazzal Z, Davies P, et al. Obstetric outcome of teenage pregnancies from 2002 to 2008: the Sheffield experience. *J Obstet Gynaecol* 2010;30:253-6.
28. Beyer DA, Amari F, Diedrich K, et al. Teenage deliveries in Northern Germany: always a risk factor for higher surgical delivery rates? *Arch Gynecol Obstet* 2011;284:535-8.
29. Jolly MC, Sebire N, Harris J, et al. Obstetric risks of pregnancy in women less than 18 years old. *Obstet Gynecol* 2000;96:962-6.
30. Nelson SM, Telfer EE, Anderson RA. The ageing ovary and uterus: new biological insights. *Hum Reprod Update* 2013 ;19:67-83.
31. Taddei S, Virdis A, Ghiadoni L, et al. Endothelium, aging, and hypertension. *Curr Hypertens Rep* 2006;8:84-9.
32. Cedergren MI. Maternal morbid obesity and the risk of adverse pregnancy outcome. *Obstet Gynecol* 2004;103:219-24.

1  
2  
3  
4  
5  
6  
7  
8  
9  
10  
11  
12  
13  
14  
15  
16  
17  
18  
19  
20  
21  
22  
23  
24  
25  
26  
27  
28  
29  
30  
31  
32  
33  
34  
35  
36  
37  
38  
39  
40  
41  
42  
43  
44  
45  
46  
47  
48  
49  
50  
51  
52  
53  
54  
55  
56  
57  
58  
59  
60

**LEGENDS**

Figure 1. Adjusted mean birth weight of neonates in singleton primiparous women in different maternal age groups. Birth weight adjusted for gestational age, maternal BMI and smoking habits, and year of delivery. Plots indicate means and bars 95% CI.

For peer review only





1  
2  
3  
4  
5  
6  
7  
8  
9  
10  
11  
12  
13  
14  
15  
16  
17  
18  
19  
20  
21  
22  
23  
24  
25  
26  
27  
28  
29  
30  
31  
32  
33  
34  
35  
36  
37  
38  
39  
40  
41  
42  
43  
44  
45  
46  
47  
48  
49  
50  
51  
52  
53  
54  
55  
56  
57  
58  
59  
60

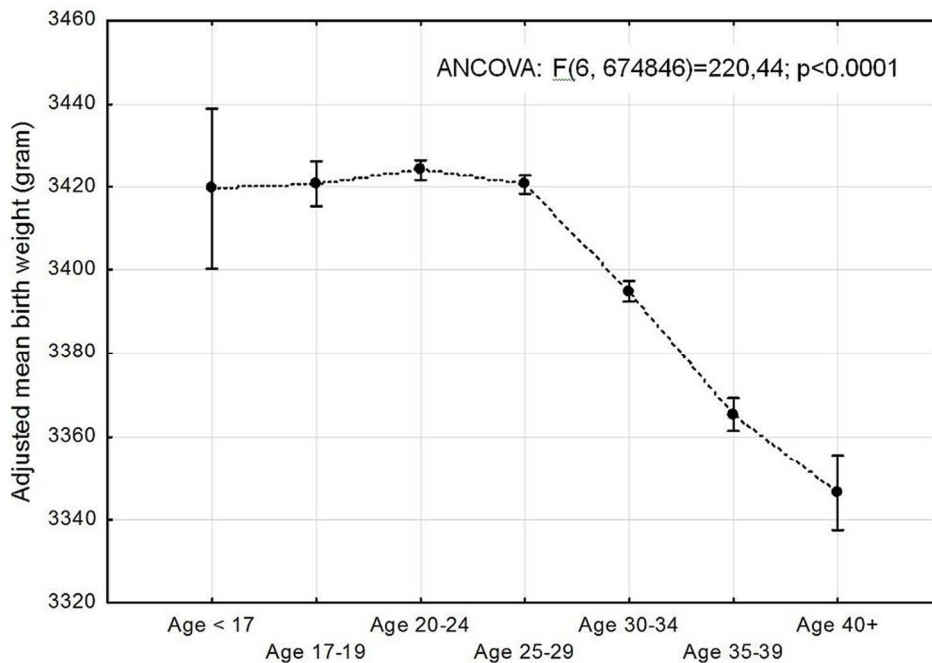

90x66mm (300 x 300 DPI)

Review only

## STROBE Statement—checklist of items that should be included in reports of observational studies

|                              | Item No   | Recommendation                                                                                                                                                                                                                                                                                                                                                                                                                                                                                                                                                                                                                                                                                         |
|------------------------------|-----------|--------------------------------------------------------------------------------------------------------------------------------------------------------------------------------------------------------------------------------------------------------------------------------------------------------------------------------------------------------------------------------------------------------------------------------------------------------------------------------------------------------------------------------------------------------------------------------------------------------------------------------------------------------------------------------------------------------|
| <b>Title and abstract</b>    | <b>1</b>  | (a) Indicate the study's design with a commonly used term in the title or the abstract. Done<br>(b) Provide in the abstract an informative and balanced summary of what was done and what was found Done                                                                                                                                                                                                                                                                                                                                                                                                                                                                                               |
| <b>Introduction</b>          |           |                                                                                                                                                                                                                                                                                                                                                                                                                                                                                                                                                                                                                                                                                                        |
| Background/rationale         | <b>2</b>  | Explain the scientific background and rationale for the investigation being reported. Done                                                                                                                                                                                                                                                                                                                                                                                                                                                                                                                                                                                                             |
| Objectives                   | <b>3</b>  | State specific objectives, including any prespecified hypotheses. Done                                                                                                                                                                                                                                                                                                                                                                                                                                                                                                                                                                                                                                 |
| <b>Methods</b>               |           |                                                                                                                                                                                                                                                                                                                                                                                                                                                                                                                                                                                                                                                                                                        |
| Study design                 | <b>4</b>  | Present key elements of study design early in the paper. Done                                                                                                                                                                                                                                                                                                                                                                                                                                                                                                                                                                                                                                          |
| Setting                      | <b>5</b>  | Describe the setting, locations, and relevant dates, including periods of recruitment, exposure, follow-up, and data collection. Done                                                                                                                                                                                                                                                                                                                                                                                                                                                                                                                                                                  |
| Participants                 | <b>6</b>  | (a) <i>Cohort study</i> —Give the eligibility criteria, and the sources and methods of selection of participants. Describe methods of follow-up. Done<br><i>Case-control study</i> —Give the eligibility criteria, and the sources and methods of case ascertainment and control selection. Give the rationale for the choice of cases and controls<br><i>Cross-sectional study</i> —Give the eligibility criteria, and the sources and methods of selection of participants<br>(b) <i>Cohort study</i> —For matched studies, give matching criteria and number of exposed and unexposed<br><i>Case-control study</i> —For matched studies, give matching criteria and the number of controls per case |
| Variables                    | <b>7</b>  | Clearly define all outcomes, exposures, predictors, potential confounders, and effect modifiers. Give diagnostic criteria, if applicable. Done                                                                                                                                                                                                                                                                                                                                                                                                                                                                                                                                                         |
| Data sources/<br>measurement | <b>8*</b> | For each variable of interest, give sources of data and details of methods of assessment (measurement). Describe comparability of assessment methods if there is more than one group. Done                                                                                                                                                                                                                                                                                                                                                                                                                                                                                                             |
| Bias                         | <b>9</b>  | Describe any efforts to address potential sources of bias. Done                                                                                                                                                                                                                                                                                                                                                                                                                                                                                                                                                                                                                                        |
| Study size                   | <b>10</b> | Explain how the study size was arrived at. All primiparous were included.                                                                                                                                                                                                                                                                                                                                                                                                                                                                                                                                                                                                                              |
| Quantitative variables       | <b>11</b> | Explain how quantitative variables were handled in the analyses. If applicable, describe which groupings were chosen and why. Done                                                                                                                                                                                                                                                                                                                                                                                                                                                                                                                                                                     |
| Statistical methods          | <b>12</b> | (a) Describe all statistical methods, including those used to control for confounding. Done<br>(b) Describe any methods used to examine subgroups and interactions<br>(c) Explain how missing data were addressed. Done<br>(d) <i>Cohort study</i> —If applicable, explain how loss to follow-up was addressed. Done<br><i>Case-control study</i> —If applicable, explain how matching of cases and controls was addressed<br><i>Cross-sectional study</i> —If applicable, describe analytical methods taking account of sampling strategy<br>(e) Describe any sensitivity analyses                                                                                                                    |

Continued on next page

**Results**

|                  |     |                                                                                                                                                                                                                                                                                                                                                                                                                                                               |
|------------------|-----|---------------------------------------------------------------------------------------------------------------------------------------------------------------------------------------------------------------------------------------------------------------------------------------------------------------------------------------------------------------------------------------------------------------------------------------------------------------|
| Participants     | 13* | (a) Report numbers of individuals at each stage of study—eg numbers potentially eligible, examined for eligibility, confirmed eligible, included in the study, completing follow-up, and analysed. Done<br>(b) Give reasons for non-participation at each stage<br>(c) Consider use of a flow diagram                                                                                                                                                         |
| Descriptive data | 14* | (a) Give characteristics of study participants (eg demographic, clinical, social) and information on exposures and potential confounders. Tables.<br>(b) Indicate number of participants with missing data for each variable of interest<br>(c) <i>Cohort study</i> —Summarise follow-up time (eg, average and total amount). Done                                                                                                                            |
| Outcome data     | 15* | <i>Cohort study</i> —Report numbers of outcome events or summary measures over time. Done<br><i>Case-control study</i> —Report numbers in each exposure category, or summary measures of exposure<br><i>Cross-sectional study</i> —Report numbers of outcome events or summary measures                                                                                                                                                                       |
| Main results     | 16  | (a) Give unadjusted estimates and, if applicable, confounder-adjusted estimates and their precision (eg, 95% confidence interval). Make clear which confounders were adjusted for and why they were included. Done only Adjusted Ors are given.<br>(b) Report category boundaries when continuous variables were categorized. Done<br>(c) If relevant, consider translating estimates of relative risk into absolute risk for a meaningful time period. Done. |
| Other analyses   | 17  | Report other analyses done—eg analyses of subgroups and interactions, and sensitivity analyses                                                                                                                                                                                                                                                                                                                                                                |

**Discussion**

|                  |    |                                                                                                                                                                                  |
|------------------|----|----------------------------------------------------------------------------------------------------------------------------------------------------------------------------------|
| Key results      | 18 | Summarise key results with reference to study objectives. Done                                                                                                                   |
| Limitations      | 19 | Discuss limitations of the study, taking into account sources of potential bias or imprecision. Discuss both direction and magnitude of any potential bias. done                 |
| Interpretation   | 20 | Give a cautious overall interpretation of results considering objectives, limitations, multiplicity of analyses, results from similar studies, and other relevant evidence. Done |
| Generalisability | 21 | Discuss the generalisability (external validity) of the study results. Done                                                                                                      |

**Other information**

|         |    |                                                                                                                                                                     |
|---------|----|---------------------------------------------------------------------------------------------------------------------------------------------------------------------|
| Funding | 22 | Give the source of funding and the role of the funders for the present study and, if applicable, for the original study on which the present article is based. Done |
|---------|----|---------------------------------------------------------------------------------------------------------------------------------------------------------------------|

\*Give information separately for cases and controls in case-control studies and, if applicable, for exposed and unexposed groups in cohort and cross-sectional studies.

**Note:** An Explanation and Elaboration article discusses each checklist item and gives methodological background and published examples of transparent reporting. The STROBE checklist is best used in conjunction with this article (freely available on the Web sites of PLoS Medicine at <http://www.plosmedicine.org/>, Annals of Internal Medicine at <http://www.annals.org/>, and Epidemiology at <http://www.epidem.com/>). Information on the STROBE Initiative is available at [www.strobe-statement.org](http://www.strobe-statement.org).

# BMJ Open

## Impact of maternal age on obstetric and neonatal outcome with emphasis on primiparous adolescents and older women-a Swedish Medical Birth Register Study.

|                                 |                                                                                                                                                                                                                                                                                                                                                  |
|---------------------------------|--------------------------------------------------------------------------------------------------------------------------------------------------------------------------------------------------------------------------------------------------------------------------------------------------------------------------------------------------|
| Journal:                        | <i>BMJ Open</i>                                                                                                                                                                                                                                                                                                                                  |
| Manuscript ID:                  | bmjopen-2014-005840.R2                                                                                                                                                                                                                                                                                                                           |
| Article Type:                   | Research                                                                                                                                                                                                                                                                                                                                         |
| Date Submitted by the Author:   | 09-Sep-2014                                                                                                                                                                                                                                                                                                                                      |
| Complete List of Authors:       | Blomberg, Marie; Department of Obstetrics and Gynaecology, Department of Clinical and Experimental Medicine<br>Birch Tyrberg, Rasmus; Department of Obstetrics and Gynaecology, Department of Clinical and Experimental Medicine<br>Kjølhede, Preben; Department of Obstetrics and Gynaecology, Department of Clinical and Experimental Medicine |
| <b>Primary Subject Heading</b>: | Obstetrics and gynaecology                                                                                                                                                                                                                                                                                                                       |
| Secondary Subject Heading:      | Epidemiology                                                                                                                                                                                                                                                                                                                                     |
| Keywords:                       | maternal age, obstetric outcome, neonatal outcome                                                                                                                                                                                                                                                                                                |
|                                 |                                                                                                                                                                                                                                                                                                                                                  |

SCHOLARONE™  
Manuscripts

1  
2 1  
3  
4 2 **Impact of maternal age on obstetric and neonatal outcome with**  
5  
6  
7 3 **emphasis on primiparous adolescents and older women-a Swedish**  
8  
9  
10 4 **Medical Birth Register Study.**  
11  
12  
13  
14 5

15  
16 6 Marie Blomberg MD, PhD, Rasmus Birch Tyrberg, BMs, and Preben Kjølhede, MD, PhD  
17  
18 7 Department of Obstetrics and Gynaecology and Department of Clinical and Experimental Medicine,  
19  
20  
21 8 Linköping University, Linköping, Sweden  
22

23 9  
24  
25  
26 10 Corresponding author:

27  
28 11 Marie Blomberg, MD, PhD

29  
30 12 Department of Obstetrics and Gynaecology,

31  
32 13 University Hospital

33  
34  
35 14 581 85 Linköping

36  
37 15 Sweden

38  
39 16 Phone +46 10 103 00 00

40  
41  
42 17 E-mail: marie.blomberg@lio.se  
43

44  
45 18 Keywords: maternal age, mode of delivery, neonatal outcome, obstetric outcome, adolescents  
46

47 19 Word count: 3607 words  
48  
49  
50 20  
51  
52  
53 21  
54  
55 22  
56  
57  
58 23  
59  
60

## 24 Abstract

25 **Objectives:** To evaluate the associations between maternal age and obstetric and neonatal outcomes in  
26 primiparous women with emphasis on teenagers and older women.

27 **Design:** A population-based cohort study.

28 **Setting:** The Swedish Medical Birth Register.

29 **Participants:** Primiparous women with singleton births from 1992 through 2010 (N=798,674) were  
30 divided into seven age groups: <17 years, 17-19 years, and additional five five-year classes. The  
31 reference group consisted of the women age 25-29 years.

32 **Primary outcome:** Obstetric and neonatal outcome.

33 **Results:** The teenager groups had significantly more vaginal births (aOR 2.04 (1.79-2.32) and 1.95  
34 (1.88-2.02) for age <17 years and 17-19 years, respectively); fewer caesarean sections (aOR 0.57  
35 (0.48-0.67) and 0.55 (0.53-0.58)), and instrumental vaginal births (aOR 0.43 (0.36-0.52) and 0.50  
36 (0.48-0.53)) compared with the reference group. The opposite was found among older women reaching  
37 a 4-fold increased odds ratio for caesarean section. The teenagers showed no increased risk of adverse  
38 neonatal outcome but presented an increased risk of prematurity <32 weeks (aOR 1.66 (1.10-2.51) and  
39 1.20 (1.04-1.38)). Women with advancing age ( $\geq 30$  years) revealed significantly increased risk of  
40 prematurity, perineal lacerations, preeclampsia, abruption, placenta previa, postpartum haemorrhage  
41 and unfavourable neonatal outcomes compared with the reference group.

42 **Conclusions:** For clinicians counselling young women it is of importance to highlight the obstetrically  
43 positive consequences that fewer maternal complications and favourable neonatal outcomes are  
44 expected. The results imply that there is a need for individualizing the antenatal surveillance programs  
45 and obstetric care based on age grouping in order to attempt to improve the outcomes in the age groups  
46 with less favourable obstetric and neonatal outcomes. Such changes in surveillance programs and  
47 obstetric interventions need to be evaluated in further studies.

1 49 **Article summary**

2  
3  
4 50 **Impact of maternal age on obstetric and neonatal outcome with emphasis on primiparous**  
5  
6 51 **adolescents and older women-a Swedish Medical Birth Register Study.**

7  
8  
9 52 Strengths and limitations of this study:

- 10  
11 53 • A strength of the present study is that it includes primiparous women of an entire country where  
12  
13 the antenatal care program is equally available to all pregnant women and is comprehensive.  
14 54  
15  
16 55 • Another advantage is the large number of individuals available for evaluation, which makes it  
17  
18 possible to divide the study population into subgroups with sufficient numbers in each stratum  
19 56  
20  
21 57 to provide high statistical power.  
22  
23 58 • A limitation is that the external validity is reduced to facilities with similar socio-economic and  
24  
25 demographic characteristics and health care systems with comparable standards.  
26 59  
27  
28 60 • The Swedish medical birth register contain a large body of information concerning the mother  
29  
30 and the child but only the available data in the register could be used for outcome evaluation  
31 61  
32  
33 62 and adjustments for putative confounders.  
34

35 63  
36  
37  
38  
39  
40  
41  
42  
43  
44  
45  
46  
47  
48  
49  
50  
51  
52  
53  
54  
55  
56  
57  
58  
59  
60

## 64 INTRODUCTION

65 There are a large number of studies evaluating obstetric and neonatal outcome over the full range of  
66 reproductive maternal ages, but especially with a focus on the youngest and the oldest mothers. Young  
67 mothers have been shown to be exposed to an increased risk of anaemia, low birth weight, foetal death,  
68 eclampsia and preterm birth although they at the same time were more likely to have a spontaneous  
69 normal vaginal birth and the risk of preeclampsia and post-partum haemorrhage were significantly  
70 decreased.[1-6] These studies evaluated outcomes in low-income countries. Many studies performed in  
71 low-income countries presented in recent years on the topic of teenage pregnancies have found similar  
72 obstetric and neonatal outcomes.[7-11]

73 Complications during pregnancy and birth at advanced maternal age (either defined as 35 years and  
74 older or 40 years or older) have also been evaluated in high-income countries. Advanced maternal age  
75 at birth has been found to be associated with gestational diabetes, preeclampsia, placenta previa,  
76 caesarean section (CS), placental abruption, preterm delivery, low birth weight, intrauterine foetal  
77 death and an increased perinatal mortality.[12-20] The difference in obstetric and neonatal outcomes  
78 between teenagers and women at advanced age seemed to be lower risks for several unwanted and  
79 threatening outcomes in the teenage group; thus there were no obvious advantages concerning obstetric  
80 and neonatal outcomes at advanced maternal ages. The earlier published studies concerning the impact  
81 of maternal age on perinatal outcome differ in many aspects methodologically as well as in the socio-  
82 demographic characteristics of the populations and health care systems. All these factors make  
83 interpretation of comparisons between data sets difficult.

84 Sweden has during several decades actively developed strategies in social care, education and health  
85 care in order to improve antenatal care and parenthood. In a Swedish state-of-the-art conference held in  
86 1990, the scientific basis of the routine antenatal program was critically evaluated. It was concluded  
87 that the scientific evidence to support the timing and contents of routine visits was unsatisfactory.[21]  
88 Consequently there is a constant need for evaluation both of single diagnostic procedures and



1 89 intervention and of outcomes. An analysis of perinatal outcomes in relation to maternal age in the  
2  
3  
4 90 Swedish population will provide important knowledge that may be used to further improve social,  
5  
6 91 antenatal, obstetric and neonatal care and reveals risk groups that in particular may need more attention  
7  
8 92 in the antenatal care.  
9

10  
11 93 The objective of the present study was to assess the impact of maternal age on obstetric and neonatal  
12  
13 94 outcomes among singleton primiparous women in Sweden, with special emphasis on the adolescents  
14  
15 95 and older mothers.  
16

17  
18 96  
19  
20  
21  
22  
23  
24  
25  
26  
27  
28  
29  
30  
31  
32  
33  
34  
35  
36  
37  
38  
39  
40  
41  
42  
43  
44  
45  
46  
47  
48  
49  
50  
51  
52  
53  
54  
55  
56  
57  
58  
59  
60

## 97 MATERIALS AND METHODS

98 This study analyses the obstetric and neonatal outcomes of all singleton primiparous women  
99 prospectively registered in the Swedish Medical Birth Register (MBR) who gave births from January 1,  
100 1992 through December 31, 2010. MBR has collected information about births in Sweden since 1973.  
101 It is compulsory for every health care provider to report to the MBR. Medical and other data on almost  
102 all (99%) births in Sweden are listed in the register, which also includes stillbirths. Starting with the  
103 first antenatal visit, usually in gestational week 10-12, the information is collected prospectively in  
104 standardized medical record forms completed at the maternity health care centers at antenatal care  
105 visits, in the birth units, and at the paediatric examination of the newborn. The standardized medical  
106 records are identical throughout the country. A description and validation of the register content is  
107 available.[22-24]

108 The study population was grouped according to maternal age into seven subgroups: <17 years; 17-19  
109 years; 20-24 years, 25-29 years, 30-34 years; 35-39 years and 40+ years. In the outcome analyses we  
110 selected the group of women age 25-29 years as reference group.

111 The list of available variables in MBR has been extended throughout the years that the register has  
112 been active. The obstetric and neonatal outcome data for the purpose of this study are those that have  
113 been available since 1992. From 1992 until June 2008 the MBR includes stillbirths after 28 weeks of  
114 gestation and from July 2008 until 2010 all stillbirths after 22 weeks of gestation are included. Each  
115 outcome studied was either marked in the MBR or registered according to the International Statistical  
116 Classification of Diseases and Related Health Problems (ICD). The obstetric outcome variables studied  
117 were gestational age, mode of delivery; normal vaginal birth (defined as neither instrumental vaginal  
118 delivery, nor CS), CS, instrumental vaginal delivery divided into forceps and vacuum extraction, mode  
119 of onset of labour, perineal laceration, preeclampsia, abruption placentae, placenta previa, use of  
120 epidural analgesia and postpartum haemorrhage (PPH) exceeding 1000 ml. The foetal and neonatal  
121 outcomes evaluated were Apgar-score at 5 minutes, foetal distress (ICD code P20.0, P20.1 and P20.9),

1 122 aspiration of meconium (ICD code P24.0), shoulder dystocia (ICD code O66.0), and stillbirth. Small-  
2  
3  
4 123 for-gestational age (SGA) newborns were defined as those with birth weight more than 2 standard  
5  
6 124 deviations (SD) below the mean birth weight for gestational age (sex and parity specific) according to a  
7  
8 125 Swedish reference curve.[25] Large-for-gestational age (LGA) newborns were those with a birth  
9  
10  
11 126 weight above 2 SD. All descriptive and background data were extracted from the MBR. The register  
12  
13 127 information on these variables was obtained from the antenatal care center records.  
14  
15  
16 128 The study was approved by the Regional Ethical Review Board in Linköping, Sweden (Dnr 2011/479-  
17  
18 129 31. Approved January 25; 2012).  
19  
20

### 21 130 **Statistical analysis**

22  
23 131 Data are presented as counts and per cent or mean and one SD. Logistic regression analyses were used  
24  
25 132 for comparison of groups for categorical data. Data on a continuous scale were compared using  
26  
27  
28 133 analysis of covariance (ANCOVA). Multivariate logistic regression models were used in order to adjust  
29  
30 134 comparisons for the confounding factors. Consequently crude and adjusted odds ratios (OR and aOR)  
31  
32  
33 135 and 95% confidence intervals (CIs) are reported. Maternal weight and height (used for calculation of  
34  
35 136 maternal Body Mass Index (BMI)) and smoking habits in early pregnancy (unknown, no smoking,  
36  
37 137 smoking) and year of birth were included as confounders in the adjusted analyses. The simultaneous  
38  
39  
40 138 model of including independent variables in the multivariate logistic regression was used since we  
41  
42 139 found it most appropriate for the relevance of the research goal of the study. The rationale for including  
43  
44 140 year of birth as an independent variable was that there was variability in the occurrence of obstetric and  
45  
46  
47 141 neonatal diagnoses during the observation period. This may be due to true changes but may also be a  
48  
49 142 result of changes in recording with expanding use of computerized medical records. Maternal BMI and  
50  
51  
52 143 smoking was included as covariates in the adjusted analyses based on their well-known associations  
53  
54 144 with maternal and foetal outcome and their unequal distribution over the maternal age strata.[26,27]  
55  
56 145 BMI was included as a continuous variable as the distribution of maternal BMI was almost uniform  
57  
58  
59 146 over the maternal age strata and the association between BMI and maternal age was almost linear  
60

1 147 (presented as means and standard deviations in Table 1). For the purpose of this study gestational age  
2  
3  
4 148 was added to the confounders in the analyses of CS, preeclampsia and birth weight based on their  
5  
6 149 clinically well-known associations. The OR for instrumental vaginal delivery was calculated among  
7  
8 150 women with vaginal births only in order to exclude women with an instrumental attempt to deliver  
9  
10  
11 151 followed by an emergency CS. The ORs of perineal lacerations were also estimated among women  
12  
13 152 with vaginal births only. The information concerning use of epidural analgesia was also restricted to  
14  
15 153 vaginal births only. Epidural is an analgesic method that has been widely used in the delivery wards for  
16  
17  
18 154 vaginal births during the entire time period. In contrast the use of epidural analgesia in CS has varied  
19  
20 155 substantially over the time period and has almost exclusively been used in elective CS. Our purpose  
21  
22 156 was to evaluate the odds ratio for epidural use over the maternal age strata and consequently we  
23  
24  
25 157 selected the mode of delivery that exhibited the least variation in the use of the analgesic method over  
26  
27 158 the time period, i.e. vaginal births.  
28  
29  
30 159 The software STATISTICA 64 version 10 (StatSoft Inc. 2300 East 14<sup>th</sup> St. Tulsa, OK 74104 USA) was  
31  
32 160 used to carry out the statistical analyses.  
33  
34  
35 161

## RESULTS

In the period 1992 – 2010, 798,732 women were registered in the MBR as giving birth to their first child. The annual number of primiparous women giving birth varied between 34060 and 49417. Information on maternal age was missing in 58 cases leaving 798,674 women for the analyses. The average age of primiparous women increased substantially from 26.2 years in 1992 to 28.5 in 2004; hereafter it has stayed almost constant at that level. The demographic, obstetric and neonatal data subdivided into maternal age groups are presented in Table 1 and 2.

Table 1. Descriptive data of primiparous women with singleton births in the period 1992-2010.

| Characteristics               | < 17 years<br>(n=2392) |       | 17-19 years<br>(n=29816) |       | 20-24 years<br>(n=185942) |       | 25-29 years<br>(n=300822) |       | 30-34 years<br>(n=205905) |       | 35-39 years<br>(n=63163) |       | 40+ years<br>(n=10634) |       |
|-------------------------------|------------------------|-------|--------------------------|-------|---------------------------|-------|---------------------------|-------|---------------------------|-------|--------------------------|-------|------------------------|-------|
| <i>BMI (kg/m<sup>2</sup>)</i> | 22.8                   | 3.7   | 23.2                     | 4.1   | 23.8                      | 4.3   | 23.7                      | 4.0   | 23.8                      | 4.0   | 24.4                     | 4.1   | 24.7                   | 4.3   |
| <i>BMI<sup>†</sup> class</i>  |                        |       |                          |       |                           |       |                           |       |                           |       |                          |       |                        |       |
| <18.5 kg/m <sup>2</sup>       | 135                    | 5.6%  | 1815                     | 6.1%  | 7650                      | 4.1%  | 7509                      | 2.5%  | 3847                      | 1.9%  | 918                      | 1.5%  | 133                    | 1.3%  |
| 18.5-24.9 kg/m <sup>2</sup>   | 1352                   | 56.5% | 16823                    | 56.4% | 104600                    | 56.3% | 180163                    | 59.9% | 122571                    | 59.5% | 34439                    | 54.5% | 5381                   | 50.1% |
| 25.0-29.9 kg/m <sup>2</sup>   | 315                    | 13.2% | 4687                     | 15.7% | 33961                     | 18.3% | 53896                     | 17.9% | 37234                     | 18.1% | 13310                    | 21.1% | 2442                   | 23.0% |
| 30.0-34.9 kg/m <sup>2</sup>   | 81                     | 3.4%  | 1327                     | 4.5%  | 10550                     | 5.7%  | 14401                     | 4.8%  | 9389                      | 4.6%  | 3575                     | 5.7%  | 683                    | 6.4%  |
| 35.0-39.9 kg/m <sup>2</sup>   | 11                     | 0.5%  | 337                      | 1.1%  | 3013                      | 1.6%  | 4070                      | 1.4%  | 2724                      | 1.3%  | 1024                     | 1.6%  | 188                    | 1.8%  |
| ≥ 40.0 kg/m <sup>2</sup>      | 4                      | 0.2%  | 87                       | 0.3%  | 904                       | 0.5%  | 1312                      | 0.4%  | 944                       | 0.5%  | 342                      | 0.5%  | 68                     | 0.6%  |
| Missing data                  | 494                    | 20.7% | 4740                     | 15.9% | 25264                     | 13.6% | 39471                     | 13.1% | 29196                     | 14.2% | 9555                     | 15.1% | 1739                   | 16.4% |
| <i>Smoking<sup>†</sup></i>    |                        |       |                          |       |                           |       |                           |       |                           |       |                          |       |                        |       |
| Yes                           | 666                    | 27.8% | 9012                     | 30.2% | 31675                     | 17.0% | 24676                     | 8.2%  | 13971                     | 6.8%  | 5287                     | 8.4%  | 958                    | 9.0%  |
| No                            | 1542                   | 64.5% | 19154                    | 64.3% | 145695                    | 78.4% | 261348                    | 86.9% | 178792                    | 86.8% | 53416                    | 84.6% | 8883                   | 83.5% |
| Missing data                  | 184                    | 7.7%  | 1650                     | 5.5%  | 8572                      | 4.6%  | 14798                     | 4.9%  | 13142                     | 6.4%  | 4460                     | 7.0%  | 793                    | 7.5%  |
| <i>Gestational age</i>        |                        |       |                          |       |                           |       |                           |       |                           |       |                          |       |                        |       |
| Information available         | 2368                   | 99.0% | 29715                    | 99.7% | 185700                    | 99.9% | 300603                    | 99.9% | 205719                    | 99.9% | 63098                    | 99.9% | 10620                  | 99.9% |
| Missing data                  | 24                     | 1.0%  | 101                      | 0.3%  | 242                       | 0.1%  | 219                       | 0.1%  | 186                       | 0.1%  | 65                       | 0.1%  | 14                     | 0.1%  |

Figures denote mean and standard deviation or counts and proportions.

BMI = body mass index.

<sup>†</sup> Reported height, weight and smoking habits at first antenatal visit.

Table 2. Obstetric and neonatal outcome characteristics of primiparous women with singleton births in the period 1992-2010.

| Characteristics                                              | Age groups             |       |                          |       |                           |       |                           |       |                           |       |                          |       |                        |       |
|--------------------------------------------------------------|------------------------|-------|--------------------------|-------|---------------------------|-------|---------------------------|-------|---------------------------|-------|--------------------------|-------|------------------------|-------|
|                                                              | < 17 years<br>(n=2392) |       | 17-19 years<br>(n=29816) |       | 20-24 years<br>(n=185942) |       | 25-29 years<br>(n=300822) |       | 30-34 years<br>(n=205905) |       | 35-39 years<br>(n=63163) |       | 40+ years<br>(n=10634) |       |
| <i>Labour:</i>                                               |                        |       |                          |       |                           |       |                           |       |                           |       |                          |       |                        |       |
| Spontaneous onset labour                                     | 2055                   | 85.9% | 25853                    | 86.7% | 158879                    | 85.4% | 251340                    | 83.6% | 163876                    | 79.6% | 45330                    | 71.2% | 6261                   | 58.9% |
| Induced labour                                               | 184                    | 7.7%  | 2528                     | 8.5%  | 17433                     | 9.4%  | 30873                     | 10.3% | 25474                     | 12.4% | 10065                    | 15.9% | 2111                   | 19.9% |
| <i>Mode of delivery:</i>                                     |                        |       |                          |       |                           |       |                           |       |                           |       |                          |       |                        |       |
| Normal vaginal birth                                         | 2030                   | 84.9% | 25096                    | 84.2% | 147082                    | 79.1% | 219993                    | 73.1% | 135099                    | 65.6% | 35112                    | 55.6% | 4724                   | 44.4% |
| Forceps                                                      | 7                      | 0.3%  | 126                      | 0.4%  | 1143                      | 0.6%  | 2166                      | 0.7%  | 1515                      | 0.7%  | 575                      | 0.9%  | 84                     | 0.8%  |
| Vacuum extraction                                            | 143                    | 6.0%  | 2090                     | 7.0%  | 18011                     | 9.7%  | 36696                     | 12.2% | 29811                     | 14.5% | 10119                    | 16.0% | 1599                   | 15.0% |
| CS <sup>‡</sup>                                              | 213                    | 8.9%  | 2500                     | 8.4%  | 19747                     | 10.6% | 42044                     | 14.0% | 39534                     | 19.2% | 17355                    | 27.5% | 4226                   | 39.7% |
| CS elective 1999-2010 †                                      | 53                     | 2.2%  | 373                      | 1.3%  | 2828                      | 1.5%  | 6973                      | 2.3%  | 7656                      | 3.7%  | 3853                     | 6.1%  | 1132                   | 10.6% |
| CS acute 1999-2010 †                                         | 73                     | 3.1%  | 882                      | 3.0%  | 7092                      | 3.8%  | 16651                     | 5.5%  | 17953                     | 8.7%  | 7826                     | 12.4% | 1798                   | 16.9% |
| <i>Gestational age:</i>                                      |                        |       |                          |       |                           |       |                           |       |                           |       |                          |       |                        |       |
| GA < 28 weeks                                                | 20                     | 0.8%  | 107                      | 0.4%  | 464                       | 0.2%  | 743                       | 0.2%  | 640                       | 0.3%  | 292                      | 0.5%  | 73                     | 0.7%  |
| GA < 32 weeks                                                | 40                     | 1.7%  | 308                      | 1.0%  | 1436                      | 0.8%  | 2415                      | 0.8%  | 2048                      | 1.0%  | 900                      | 1.4%  | 206                    | 1.9%  |
| GA < 37 weeks                                                | 213                    | 8.9%  | 1937                     | 6.5%  | 11030                     | 5.9%  | 18005                     | 5.6%  | 12727                     | 6.2%  | 4586                     | 7.3%  | 877                    | 8.2%  |
| GA 37 – 41 weeks                                             | 1990                   | 83.2% | 25811                    | 86.6% | 161043                    | 86.6% | 257320                    | 85.5% | 172621                    | 83.8% | 51494                    | 81.5% | 8786                   | 82.6% |
| GA ≥ 42 weeks                                                | 165                    | 6.9%  | 1967                     | 6.6%  | 13627                     | 7.3%  | 25278                     | 8.4%  | 20371                     | 9.9%  | 7018                     | 11.1% | 957                    | 9.0%  |
| <i>Maternal complications and use of epidural analgesia:</i> |                        |       |                          |       |                           |       |                           |       |                           |       |                          |       |                        |       |
| Perineal laceration gr 1-2*                                  | 311                    | 14.3% | 3982                     | 14.6% | 32602                     | 19.6% | 70452                     | 27.3% | 55163                     | 33.2% | 15477                    | 33.9% | 2116                   | 33.1% |
| Perineal laceration gr 3-4*                                  | 23                     | 1.1%  | 272                      | 1.0%  | 3030                      | 1.8%  | 8202                      | 3.2%  | 6846                      | 4.1%  | 1856                     | 4.1%  | 222                    | 3.5%  |
| Preeclampsia                                                 | 43                     | 1.8%  | 576                      | 1.9%  | 4317                      | 2.3%  | 6520                      | 2.2%  | 4265                      | 2.1%  | 1610                     | 2.5%  | 365                    | 3.4%  |
| Abruptio placentae                                           | 16                     | 0.7%  | 135                      | 0.5%  | 643                       | 0.3%  | 1171                      | 0.4%  | 955                       | 0.5%  | 390                      | 0.6%  | 87                     | 0.8%  |
| Placenta previa                                              | 2                      | 0.1%  | 16                       | 0.1%  | 159                       | 0.1%  | 505                       | 0.2%  | 612                       | 0.3%  | 375                      | 0.6%  | 89                     | 0.8%  |
| PPH > 1000 ml (VB)                                           | 65                     | 3.0%  | 667                      | 2.4%  | 5078                      | 3.1%  | 10931                     | 4.2%  | 9720                      | 5.9%  | 3173                     | 6.9%  | 485                    | 7.6%  |
| PPH > 1000 ml (CS)                                           | 2                      | 0.9%  | 28                       | 1.1%  | 252                       | 1.3%  | 541                       | 1.3%  | 578                       | 1.5%  | 237                      | 1.4%  | 80                     | 1.9%  |
| Epidural analgesia*                                          | 903                    | 41.4% | 11569                    | 42.4% | 68332                     | 41.1% | 105266                    | 40.7% | 70691                     | 42.5% | 20151                    | 44.0% | 2743                   | 42.9% |

Table 2 continued. Obstetric and neonatal outcome characteristics of primiparous women with singleton births in the period 1992-2010.

| Characteristics        | Age groups             |      |                          |      |                           |      |                           |      |                           |      |                          |      |                        |      |
|------------------------|------------------------|------|--------------------------|------|---------------------------|------|---------------------------|------|---------------------------|------|--------------------------|------|------------------------|------|
|                        | < 17 years<br>(n=2392) |      | 17-19 years<br>(n=29816) |      | 20-24 years<br>(n=185942) |      | 25-29 years<br>(n=300822) |      | 30-34 years<br>(n=205905) |      | 35-39 years<br>(n=63163) |      | 40+ years<br>(n=10634) |      |
| <i>Neonatal</i>        |                        |      |                          |      |                           |      |                           |      |                           |      |                          |      |                        |      |
| Foetal distress        | 8                      | 0.3% | 122                      | 0.4% | 932                       | 0.5% | 1621                      | 0.5% | 1070                      | 0.5% | 388                      | 0.6% | 56                     | 0.5% |
| Aspiration of meconium | 0                      | 0%   | 30                       | 0.1% | 363                       | 0.2% | 649                       | 0.2% | 563                       | 0.3% | 193                      | 0.3% | 42                     | 0.4% |
| Shoulder dystocia      | 6                      | 0.3% | 78                       | 0.3% | 793                       | 0.4% | 1580                      | 0.5% | 1382                      | 0.7% | 489                      | 0.8% | 79                     | 0.7% |
| Stillbirth             | 7                      | 0.3% | 102                      | 0.3% | 571                       | 0.3% | 893                       | 0.3% | 768                       | 0.4% | 347                      | 0.5% | 87                     | 0.8% |
| SGA                    | 91                     | 3.8% | 1136                     | 3.8% | 6016                      | 3.2% | 8831                      | 2.9% | 7216                      | 3.5% | 2962                     | 4.7% | 617                    | 5.8% |
| LGA                    | 47                     | 2.0% | 539                      | 1.8% | 3838                      | 2.1% | 5943                      | 2.0% | 3846                      | 1.9% | 1279                     | 2.0% | 224                    | 2.1% |
| Apgar score < 7 at 5   | 43                     | 1.8% | 381                      | 1.3% | 2409                      | 1.3% | 4158                      | 1.4% | 3354                      | 1.6% | 1274                     | 2.0% | 240                    | 2.3% |
| Birth weight (gram)    | 3348                   | 592  | 3403                     | 565  | 3453                      | 554  | 3470                      | 555  | 3452                      | 572  | 3415                     | 612  | 3360                   | 640  |

Figures denote counts and proportions or mean and one standard deviation.

BMI = body mass index; CS = caesarean section; GA = gestational age at birth; LGA = large for gestational age; PPH = postpartum haemorrhage; SGA = small for gestational age; VB = vaginal birth

‡All CS independent of status of performance – acute or elective. †Caesarean section was subdivided into elective and acute CS from 1999.

\*Epidural analgesia and perineal lacerations in vaginal births only.



1  
2  
3  
4  
5  
6  
7  
8  
9  
10  
11  
12  
13  
14  
15  
16  
17  
18  
19  
20  
21  
22  
23  
24  
25  
26  
27  
28  
29  
30  
31  
32  
33  
34  
35  
36  
37  
38  
39  
40  
41  
42  
43  
44  
45  
46  
47  
48  
49  
50  
51  
52  
53  
54  
55  
56  
57  
58  
59  
60

The crude odds rates and the results of the multivariate analyses models of obstetric and neonatal outcomes are shown in Table 3 and 4, respectively.

For peer review only

Table 3. Obstetric outcome data in singleton primiparous women in the period 1992-2010 in relation to maternal age group.

| Characteristics          | Crude OR (95%CI) | aOR (95%CI)†     | Crude OR (95%CI) | aOR (95%CI)†     | Crude OR (95%CI) | aOR (95%CI)†     |
|--------------------------|------------------|------------------|------------------|------------------|------------------|------------------|
| <i>Labour</i>            |                  |                  |                  |                  |                  |                  |
|                          | < 17 years       |                  | 17-19 years      |                  | 20-24 years      |                  |
| Spontaneous onset labour | 1.20 (1.07-1.35) | 1.20 (1.05-1.37) | 1.28 (1.24-1.33) | 1.26 (1.21-1.31) | 1.16 (1.14-1.17) | 1.16 (1.14-1.18) |
| Induced labour           | 0.73 (0.63-0.85) | 0.78 (0.66-0.93) | 0.81 (0.78-0.85) | 0.86 (0.82-0.90) | 0.90 (0.89-0.92) | 0.91 (0.90-0.93) |
|                          | 30 - 34 years    |                  | 35 - 39 years    |                  | 40+ years        |                  |
| Spontaneous onset labour | 0.77 (0.76-0.78) | 0.78 (0.77-0.79) | 0.50 (0.49-0.51) | 0.52 (0.51-0.54) | 0.29 (0.26-0.30) | 0.30 (0.28-0.31) |
| Induced labour           | 1.23 (1.21-1.26) | 1.19 (1.17-1.21) | 1.66 (1.62-1.70) | 1.54 (1.50-1.58) | 2.17 (2.06-2.27) | 1.97 (1.87-2.08) |
| <i>Mode of delivery</i>  |                  |                  |                  |                  |                  |                  |
|                          | < 17 years       |                  | 17-19 years      |                  | 20-24 years      |                  |
| Normal vaginal birth     | 2.05 (1.84-2.30) | 2.04 (1.79-2.32) | 1.95 (1.89-2.02) | 1.95 (1.88-2.02) | 1.39 (1.37-1.41) | 1.39 (1.37-1.41) |
| Forceps*                 | 0.38 (0.18-0.81) | 0.41 (0.18-0.92) | 0.55 (0.46-0.64) | 0.48 (0.39-0.59) | 0.82 (0.76-0.88) | 0.77 (0.71-0.84) |
| Vacuum extraction‡       | 0.42 (0.36-0.51) | 0.43 (0.36-0.52) | 0.50 (0.48-0.53) | 0.50 (0.48-0.53) | 0.74 (0.72-0.75) | 0.74 (0.72-0.75) |
| CS. all                  | 0.60 (0.52-0.69) | 0.57 (0.48-0.67) | 0.56 (0.54-0.69) | 0.55 (0.53-0.58) | 0.73 (0.72-0.74) | 0.72 (0.71-0.74) |
| CS elective 1999-2010 †  | 0.95 (0.73-1.25) | 0.83 (0.60-1.14) | 0.53 (0.48-0.59) | 0.53 (0.47-0.60) | 0.65 (0.62-0.68) | 0.68 (0.65-0.71) |
| CS acute 1999-2010 †     | 0.54 (0.43-0.68) | 0.53 (0.40-0.69) | 0.52 (0.49-0.56) | 0.56 (0.52-0.61) | 0.68 (0.66-0.70) | 0.71 (0.69-0.73) |
|                          | 30 - 34 years    |                  | 35 - 39 years    |                  | 40+ years        |                  |
| Normal vaginal delivery  | 0.70 (0.69-0.71) | 0.72 (0.71-0.73) | 0.46 (0.45-0.47) | 0.48 (0.47-0.49) | 0.29 (0.28-0.31) | 0.31 (0.30-0.32) |
| Forceps*                 | 1.08 (1.01-1.15) | 1.20 (1.12-1.29) | 1.48 (1.35-1.63) | 1.66 (1.49-1.84) | 1.58 (1.27-1.98) | 1.75 (1.37-2.24) |
| Vacuum extraction‡       | 1.32 (1.30-1.34) | 1.29 (1.27-1.32) | 1.72 (1.67-1.76) | 1.67 (1.63-1.72) | 2.01 (1.90-2.13) | 1.92 (1.80-2.04) |
| CS. all                  | 1.46 (1.44-1.49) | 1.44 (1.42-1.47) | 2.34 (2.29-2.38) | 2.21 (2.16-2.26) | 4.07 (3.91-4.23) | 3.78 (3.61-3.96) |
| CS elective 1999-2010 †  | 1.63 (1.57-1.68) | 1.44 (1.39-1.49) | 2.74 (2.63-2.85) | 2.25 (2.15-2.35) | 5.03 (4.70-5.36) | 3.89 (3.61-4.20) |
| CS acute 1999-2010 †     | 1.63 (1.59-1.67) | 1.44 (1.40-1.47) | 2.41 (2.35-2.48) | 1.94 (1.88-2.00) | 3.47 (3.29-3.66) | 2.68 (2.52-2.85) |
| <i>Gestational age</i>   |                  |                  |                  |                  |                  |                  |
|                          | < 17 years       |                  | 17-19 years      |                  | 20-24 years      |                  |
| GA < 28 weeks            | 3.44 (2.20-5.37) | 2.84 (1.59-5.06) | 1.46 (1.19-1.79) | 1.25 (0.97-1.62) | 1.01 (0.90-1.14) | 0.89 (0.77-1.02) |
| GA < 32 weeks            | 2.12 (1.55-2.91) | 1.66 (1.10-2.51) | 1.29 (1.15-1.46) | 1.20 (1.04-1.38) | 0.96 (0.90-1.03) | 0.92 (0.85-0.99) |
| GA < 37 weeks            | 1.55 (1.34-1.79) | 1.46 (1.24-1.72) | 1.09 (1.04-1.15) | 1.03 (0.98-1.09) | 0.99 (0.97-1.02) | 0.97 (0.95-1.00) |
| GA 37 – 41 weeks         | 0.89 (0.79-0.99) | 0.88 (0.77-0.99) | 1.11 (1.07-1.15) | 1.14 (1.09-1.18) | 1.10 (2.08-1.12) | 1.12 (1.10-1.14) |
| GA ≥ 42 weeks            | 0.82 (0.70-0.96) | 0.89 (0.75-1.06) | 0.77 (0.74-0.81) | 0.79 (0.74-0.83) | 0.86 (0.84-0.88) | 0.85 (0.83-0.87) |
|                          | 30 - 34 years    |                  | 35 - 39 years    |                  | 40+ years        |                  |
| GA < 28 weeks            | 1.26 (1.13-1.40) | 1.17 (1.04-1.33) | 1.88 (1.64-2.15) | 1.61 (1.40-1.90) | 2.79 (2.19-3.56) | 2.48 (1.86-3.29) |
| GA < 32 weeks            | 1.24 (1.17-1.32) | 1.24 (1.16-1.33) | 1.79 (1.65-1.93) | 1.68 (1.53-1.84) | 2.44 (2.12-2.82) | 2.25 (1.90-2.66) |
| GA < 37 weeks            | 1.04 (1.01-1.06) | 1.02 (0.99-1.05) | 1.23 (1.19-1.27) | 1.19 (1.15-1.24) | 1.41 (1.32-1.52) | 1.37 (1.26-1.48) |
| GA 37 – 41 weeks         | 0.88 (0.86-0.89) | 0.89 (0.86-0.89) | 0.75 (0.73-0.76) | 0.76 (0.74-0.78) | 0.81 (0.77-0.85) | 0.83 (0.79-0.88) |
| GA ≥ 42 weeks            | 1.20 (1.17-1.22) | 1.20 (1.18-1.23) | 1.36 (1.33-1.40) | 1.35 (1.31-1.39) | 1.08 (1.01-1.15) | 1.06 (0.98-1.14) |

Table 3 continued. Obstetric outcome data in singleton primiparous women in the period 1992-2010 in relation to maternal age group.

| Characteristics                                              | Crude OR (95%CI) | aOR (95%CI)†     | Crude OR (95%CI) | aOR (95%CI)†     | Crude OR (95%CI) | aOR (95%CI)†     |
|--------------------------------------------------------------|------------------|------------------|------------------|------------------|------------------|------------------|
| <i>Maternal complications and use of epidural analgesia:</i> |                  |                  |                  |                  |                  |                  |
|                                                              | < 17 years       |                  | 17-19 years      |                  | 20-24 years      |                  |
| Perineal laceration grade 1-2‡                               | 0.44 (0.39-0.50) | 0.44 (0.38-0.50) | 0.46 (0.44-0.47) | 0.47 (0.45-0.49) | 0.65 (0.64-0.66) | 0.68 (0.67-0.69) |
| Perineal laceration grade 3-4‡                               | 0.33 (0.22-0.49) | 0.39 (0.25-0.60) | 0.31 (0.25-0.37) | 0.37 (0.32-0.42) | 0.57 (0.54-0.59) | 0.61 (0.58-0.64) |
| Preeclampsia                                                 | 0.83 (0.61-1.12) | 0.89 (0.62-1.27) | 0.89 (0.82-0.97) | 0.93 (0.84-1.02) | 1.07 (1.03-1.12) | 1.01 (0.96-1.05) |
| Abruptio placentae                                           | 1.72 (1.05-2.83) | 1.76 (1.03-3.00) | 1.16 (0.97-1.39) | 1.02 (0.83-1.26) | 0.89 (0.81-0.98) | 0.83 (0.74-0.92) |
| Placenta praevia                                             | 0.50 (0.12-2.00) | 0.57 (0.14-2.30) | 0.32 (0.19-0.53) | 0.28 (0.16-0.50) | 0.52 (0.43-0.61) | 0.52 (0.43-0.63) |
| PPH > 1000 ml (VB)                                           | 0.70 (0.54-0.89) | 0.65 (0.48-0.88) | 0.57 (0.53-0.61) | 0.64 (0.59-0.70) | 0.71 (0.69-0.74) | 0.78 (0.75-0.81) |
| PPH > 1000 ml (CS)                                           | 0.73 (0.18-2.93) | 0.52 (0.07-3.74) | 0.87 (0.59-1.27) | 1.16 (0.77-1.93) | 0.99 (0.92-1.07) | 1.09 (0.93-1.28) |
| Epidural analgesia‡                                          | 1.03 (0.95-1.12) | 1.03 (0.93-1.13) | 1.07 (1.06-1.08) | 1.07 (1.04-1.10) | 1.02 (1.01-1.03) | 1.03 (1.01-1.04) |
|                                                              | 30 - 34 years    |                  | 35 - 39 years    |                  | 40+ years        |                  |
| Perineal laceration grade 1-2‡                               | 1.33 (1.31-1.34) | 1.11 (1.10-1.13) | 1.37 (1.34-1.40) | 1.08 (1.05-1.10) | 1.32 (1.25-1.39) | 1.00 (0.94-1.07) |
| Perineal laceration grade 3-4‡                               | 1.31 (1.27-1.36) | 1.16 (1.12-1.20) | 1.29 (1.23-1.36) | 1.12 (1.05-1.18) | 1.10 (0.96-1.26) | 0.88 (0.75-1.02) |
| Preeclampsia                                                 | 0.95 (0.92-0.99) | 1.07 (1.03-1.12) | 1.18 (1.12-1.25) | 1.30 (1.22-1.39) | 1.60 (1.44-1.79) | 1.83 (1.62-2.06) |
| Abruptio placentae                                           | 1.19 (1.09-1.30) | 1.27 (1.16-1.40) | 1.59 (1.42-1.78) | 1.71 (1.50-1.94) | 2.11 (1.70-2.63) | 2.09 (1.62-2.71) |
| Placenta praevia                                             | 1.77 (1.58-1.99) | 1.74 (1.53-2.00) | 3.55 (3.11-4.06) | 3.47 (2.99-4.03) | 5.02 (4.00-6.29) | 5.23 (4.08-6.70) |
| PPH > 1000 ml (VB)                                           | 1.41 (1.37-1.45) | 1.27 (1.23-1.31) | 1.69 (1.62-1.76) | 1.47 (1.40-1.53) | 1.86 (1.69-2.05) | 1.48 (1.26-1.52) |
| PPH > 1000 ml (CS)                                           | 1.14 (1.01-1.28) | 1.04 (0.91-1.18) | 1.06 (0.91-1.24) | 0.95 (0.81-1.12) | 1.48 (1.17-1.88) | 1.35 (1.05-1.73) |
| Epidural analgesia‡                                          | 1.08 (1.06-1.09) | 1.03 (1.02-1.05) | 1.14 (1.12-1.17) | 1.06 (1.04-1.09) | 1.10 (1.04-1.15) | 0.98 (0.93-1.03) |

Reference group: Maternal age 25-29 years.

CI = confidence intervals; CS = Caesarean section; GA = gestational age at delivery; N/A = not applicable; aOR = adjusted odds ratio; PPH = postpartum haemorrhage; VD = vaginal birth.

† Adjusted for maternal BMI and smoking habits at first antenatal care visit and year of birth. CS and preeclampsia also adjusted for gestational age. ‡ Caesarean section was subdivided into elective and acute CS from 1999. § Forceps, vacuum extraction, epidural analgesia and perineal lacerations among vaginally delivered women.

Table 4. Neonatal outcome data in singleton primiparous women in the period 1992-2010 in relation to maternal age group.

| Characteristics                | Crude OR (95%CI) |                  | aOR (95%CI) <sup>†</sup> |                  | Crude OR (95%CI) |                  | aOR (95%CI) <sup>†</sup> |  |
|--------------------------------|------------------|------------------|--------------------------|------------------|------------------|------------------|--------------------------|--|
|                                | < 17 years       |                  | 17-19 years              |                  | 20-24 years      |                  | 30 - 34 years            |  |
| Foetal distress                | 0.62 (0.31-1.24) | 0.52 (0.22-1.26) | 0.76 (0.63-0.91)         | 0.63 (0.51-0.79) | 0.93 (0.86-1.01) | 0.79 (0.72-0.91) |                          |  |
| Aspiration of meconium         | N/A              | N/A              | 0.47 (0.32-0.67)         | 0.46 (0.31-0.70) | 0.90 (0.80-1.03) | 0.93 (0.81-1.07) |                          |  |
| Shoulder dystocia <sup>‡</sup> | 0.45 (0.11-1.82) | 0.32(0.05-2.29)  | 0.74 (0.58-0.90)         | 0.74 (0.52-1.07) | 1.01 (0.88-1.16) | 1.00 (0.86-1.16) |                          |  |
| Stillbirth                     | 0.99 (0.47-2.08) | 0.58 (0.19-1.80) | 1.15 (0.94-1.42)         | 0.97 (0.75-1.25) | 1.03 (0.93-1.15) | 0.98 (0.87-1.11) |                          |  |
| SGA                            | 1.32 (1.07-1.63) | 1.00 (0.78-1.28) | 1.31 (1.23-1.40)         | 1.01 (0.94-1.09) | 1.11 (1.07-1.14) | 1.00 (0.96-1.04) |                          |  |
| LGA                            | 1.01 (0.75-1.34) | 1.08 (0.76-1.53) | 0.92 (0.84-1.00)         | 1.03 (0.94-1.14) | 1.05 (1.00-1.09) | 1.05 (1.00-1.10) |                          |  |
| Apgar score < 7 at 5 minutes   | 1.31 (0.96-1.77) | 1.30 (0.91-1.86) | 0.92 (0.83-1.03)         | 0.92 (0.81-1.11) | 0.93 (0.89-0.99) | 0.93 (0.88-0.98) |                          |  |
|                                | 30 - 34 years    |                  | 35 - 39 years            |                  | 40+ years        |                  |                          |  |
| Foetal distress                | 0.96 (0.89-1.04) | 1.23 (1.13-1.35) | 1.14 (1.02-1.27)         | 1.51 (1.33-1.72) | 0.98 (0.75-1.28) | 1.60 (1.20-2.13) |                          |  |
| Aspiration of meconium         | 1.27 (1.13-1.42) | 1.36 (1.20-1.54) | 1.42 (1.21-1.67)         | 1.48 (1.24-1.77) | 1.83 (1.34-2.51) | 1.82 (1.28-2.58) |                          |  |
| Shoulder dystocia <sup>‡</sup> | 1.18 (1.04-1.35) | 1.13 (0.90-1.41) | 1.13 (0.91-1.39)         | 1.13 (0.91-1.41) | 1.47 (0.93-2.33) | 1.27 (0.76-2.12) |                          |  |
| Stillbirth                     | 1.26 (1.14-1.38) | 1.25 (1.12-1.39) | 1.85 (1.64-2.10)         | 1.72 (1.49-1.99) | 2.77 (2.22-3.46) | 2.34 (1.80-3.03) |                          |  |
| SGA                            | 1.20 (1.16-1.24) | 1.24 (1.20-1.28) | 1.63 (1.56-1.70)         | 1.65 (1.58-1.73) | 2.04 (1.87-2.22) | 2.06 (1.87-2.26) |                          |  |
| LGA                            | 0.94 (0.91-0.98) | 0.94 (0.90-0.98) | 1.03 (0.97-1.09)         | 0.97 (0.91-1.04) | 1.07 (0.93-1.22) | 0.94 (0.81-1.09) |                          |  |
| Apgar score < 7 at 5 minutes   | 1.18 (1.13-1.24) | 1.18 (1.12-1.24) | 1.47 (1.38-1.56)         | 1.39 (1.29-1.49) | 1.65 (1.44-1.88) | 1.51 (1.30-1.75) |                          |  |

Reference group: Maternal age 25-29 years.

CI = confidence interval; LGA = large for gestational age; N/A = not applicable; aOR = adjusted odds ratio; SGA = small for gestational age

<sup>†</sup> Adjusted for maternal BMI and smoking habits at first antenatal care visit and year of birth

<sup>‡</sup> Shoulder dystocia among vaginal delivered women.

1 ***Mode of delivery, obstetric and neonatal outcome of adolescents***

2  
3  
4 2 Compared with the reference group the teenagers had a significantly higher likelihood of having  
5  
6 3 spontaneous onset of labour and of having a normal vaginal delivery. Teenagers also demonstrated a  
7  
8 4 significantly higher risk of giving birth prematurely. However, only the group of teenagers younger  
9  
10 5 than 17 years of age had an increased risk of giving birth very prematurely i.e. before 28 weeks of  
11  
12 6 gestational age, and the same group revealed a significantly higher risk of placental abruption. In  
13  
14 7 contrast with these observations the teenagers were delivered instrumentally and by CS significantly  
15  
16 8 less often, and the vaginal births caused significantly fewer perineal lacerations (only evaluated among  
17  
18 9 women who delivered vaginally) and PPH > 1000 ml. Likewise the occurrence of placenta previa was  
19  
20 10 seen less often among teenagers whereas the occurrence of preeclampsia was equal to that seen in the  
21  
22 11 reference group.

23  
24  
25  
26  
27  
28 12 Concerning the foetal and neonatal outcomes for adolescents the newborns were less likely to show  
29  
30 13 foetal distress and meconium aspiration in spite of a similar occurrence of Apgar score < 7 at 5  
31  
32 14 minutes. The newborns of the adolescents were not more prone to being stillborn or being SGA than  
33  
34 15 the newborns of women in the reference group. The adjusted mean birth weight of newborns of  
35  
36 16 adolescents did not differ significantly from that of women up to 29 years of age (Figure 1).

37  
38  
39  
40 17 ***Mode of delivery, obstetric and neonatal outcome of women 20-24 years of age***

41  
42 18 The young women, 20 – 24 years of age, differed in some aspects from the reference group as well as  
43  
44 19 from the adolescents. They were less likely to be delivered prematurely and had a lower frequency of  
45  
46 20 placental abruption. Otherwise the obstetric and neonatal outcomes were similarly favourable as those  
47  
48 21 observed for the adolescents in comparison with the reference group.

49  
50  
51  
52 22 ***Mode of delivery, obstetric and neonatal outcome of women older than 29 years of age***

53  
54  
55 23 As shown in Table 3 compared with the reference group almost all obstetric outcome variables  
56  
57 24 demonstrated a continuously progressive deterioration with increasing age. The likelihood of normal  
58  
59  
60

1 25 vaginal births decreased; induced labour, instrumental deliveries and CS increased as well as  
2  
3  
4 26 prematurity including very premature deliveries. The risk of perineal laceration increased moderately  
5  
6 27 whereas the risk of PPH > 1000 ml in vaginal births was more pronounced. The likelihood of the  
7  
8 28 pregnancy complications preeclampsia, abruptio placenta and placenta previa was also higher in the  
9  
10 29 older age groups and progressed substantially with increasing age. Similarly, the foetal and neonatal  
11  
12 30 outcome was adversely progressively influenced by increasing maternal age. With increasing maternal  
13  
14 31 age over 30 years significantly more neonates were SGA, showed foetal distress, had Apgar score < 7  
15  
16 32 at 5 minutes or meconium aspiration, or were stillborn. The mean birth weight of the neonates also  
17  
18 33 decreased significantly with increasing maternal age after the age of 30 (Figure 1).  
19  
20  
21  
22  
23 34  
24  
25  
26  
27  
28  
29  
30  
31  
32  
33  
34  
35  
36  
37  
38  
39  
40  
41  
42  
43  
44  
45  
46  
47  
48  
49  
50  
51  
52  
53  
54  
55  
56  
57  
58  
59  
60

## DISCUSSION

This Swedish nation-wide population-based study with prospectively collected data concerning singleton primiparous women showed that the mode of delivery differed over the maternal age strata. Significantly more normal vaginal deliveries and fewer CS and instrumental vaginal deliveries were seen among the teenagers and among women aged 20-24 compared with the reference group of women aged 25-29. The opposite was found among older women reaching a 4-fold increased risk for CS compared with women aged 20-24. The teenagers as well as women aged 20-24 were less prone to perineal lacerations and PPH exceeding 1000 ml. Prematurity (< 28 weeks of GA) was associated with very low maternal age (<17 years) among the adolescents although the increased risk was at the same level as among women aged 40 years and above, indicating a u-shaped risk curve. Adolescents were not afflicted more by preeclampsia than the reference women whereas the risk of preeclampsia increased significantly with advancing maternal age. The risk of placenta praevia increased dramatically with maternal age, actually a 500% increased risk was found after the age of 40 compared with the reference group. There was a significantly increased risk of stillbirth, SGA and low Apgar score only in women aged 30 years and over.

The most prominent difference between the findings in the present study and earlier studies is that no increased risk for SGA was found among the adolescents and young mothers 20-24 years of age compared with the reference women.[8-9] It must be kept in mind that the definition of SGA may differ between countries. In the United States and Latin America SGA is usually defined as birth weight below the 10<sup>th</sup> percentile compared with two SD in the Nordic countries.[3, 9] Adjusted risks for SGA among teenagers, recently presented from Finland, one of the Nordic countries, showed no increased risk among the youngest mothers.[6] In that study the control group was defined in the same way as in the present study but the Finnish study did not adjust for smoking habits. We found that smoking in early pregnancy was a significant independent risk factor for SGA in all age groups but it was only in the young women below 25 years of age that the adjustment of smoking turned the statistically

1 60 significant crude ORs into non-significant adjusted OR values. The contrary was found for the older  
2  
3  
4 61 women where the already significant crude ORs for SGA even became increased. This observation  
5  
6 62 may support a biological explanation for SGA in the older women. Differences concerning the risk for  
7  
8 63 SGA could also be attributable to differences in socio-economic status. Chen et al. restricted their  
9  
10  
11 64 analysis to white married mothers with age-appropriate education level, adequate prenatal care, without  
12  
13 65 smoking and alcohol use during pregnancy but found the increased risk for SGA to persist.[3] Several  
14  
15 66 studies have shown low infant birth weight for adolescents as well as for mothers with advancing  
16  
17  
18 67 age.[18, 14, 28, 29] We failed to find such association among the adolescents, but in women with  
19  
20 68 advancing age the difference in birth weight was statistically significant although the difference lacked  
21  
22 69 clinical significance.

23  
24  
25 70 The finding of a preferable birth outcome with lower CS rates and lower rates of instrumental delivery  
26  
27 71 among teenagers compared with older women has been pinpointed to a lesser extent than observed  
28  
29  
30 72 adverse outcomes. Earlier studies have shown relatively consistent results concerning a decreased rate  
31  
32 73 of CS in the adolescent group and a higher rate in women with advancing age.[6, 8, 9, 12-18] We were  
33  
34 74 able to evaluate elective and emergency CS separately and the risks among the teenagers and mothers  
35  
36  
37 75 age 20-24 years were decreased for both types. This might indicate that the different risks concerning  
38  
39 76 CS among young and older mothers could not exclusively be explained by more CS on maternal  
40  
41 77 request among older mothers but may even be caused by biological factors. A low rate of instrumental  
42  
43  
44 78 deliveries and CS among adolescents and a high rate among older women have almost unanimously  
45  
46 79 been shown in several reports from high-income as well as low-income countries.[5, 7, 12-18, 28-31]

47  
48  
49 80 Whether this phenomenon depends on differences in handling the delivery, inherent or cultural  
50  
51 81 behavioural, domestic or social attitudes among the obstetric staff or biological factors has not been  
52  
53 82 investigated. Advancing age is associated with impaired uterine contractility as well as endothelial  
54  
55  
56 83 dysfunction which theoretically may lead to impaired uterine and utero-placental function.[32, 33] The  
57  
58 84 fact that adolescents in our study had a lower risk of induction of labour, perineal laceration, PPH,  
59  
60



1 85 abruption (except for the very young women) and placenta previa and women with advancing age had  
2  
3  
4 86 higher risks of all these outcomes including preeclampsia could support a biological explanation.  
5  
6 87 Concerning prematurity the age related risk curve was U shaped. This may also support a biological  
7  
8 88 aetiology; immaturity of the uterus in the very young women that obstruct development of a term  
9  
10  
11 89 pregnancy and uterine dysfunction caused by ageing processes in women with advancing age and  
12  
13 90 consequently deliver prematurely in both situations. The neonatal outcomes followed almost the same  
14  
15 91 pattern; foetal distress, meconium aspiration, stillbirth, SGA and low Apgar score were exclusively  
16  
17  
18 92 attributed to women older than 29.  
19  
20 93 The strength of this study is that it deals with the outcomes in the population of an entire country where  
21  
22 94 the antenatal care program is equally available to all pregnant women and is comprehensive. In Sweden  
23  
24  
25 95 pregnant women have completely cost free access to antenatal and obstetric facilities; poverty and  
26  
27 96 malnutrition are practically non-existent and the vast majority of women attends the antenatal care  
28  
29  
30 97 program (99%) independent of socio-economic status and is delivered in obstetric units.[21] This  
31  
32 98 context is valid for the whole study period. Another advantage is the large number of individuals  
33  
34 99 available for evaluation, which makes it possible to divide the study population into subgroups with  
35  
36  
37 100 sufficient numbers in each stratum to provide high statistical power. A sufficient number of study  
38  
39 101 subjects made it possible to evaluate three subgroups of young maternal age. Only primiparous women  
40  
41 102 were included in order to avoid the confounding effects of factors associated with subsequent  
42  
43  
44 103 deliveries. There are limitations that should be considered. The external validity is reduced to facilities  
45  
46 104 with similar socio-economic and demographic characteristics and health care systems with comparable  
47  
48  
49 105 standards. The drawback is obvious given the large size of the study and the numbers of health care  
50  
51 106 units involved that the criteria for diagnosis (ICD codes) to define outcomes may not be uniform across  
52  
53 107 the study population but the variation is most likely not related to maternal age. The MBR contain a  
54  
55  
56 108 large body of information concerning the mother and the child which made it possible to adjust the  
57  
58 109 results for confounding factors. At the same time this is a limitation as only the data available in the  
59  
60

1 110 register could be used for adjustments. The register lacks information on ethnicity and socio-economic  
2  
3  
4 111 status. Our effort was to evaluate obstetric and neonatal outcome in different maternal age groups  
5  
6 112 compared with women aged 25-29 overall. The only stratifications made were for year of birth,  
7  
8 113 maternal BMI and smoking in early pregnancy. The data on year of birth showed that there is  
9  
10  
11 114 variability in the existence of obstetric and neonatal diagnoses during the observation period. This may  
12  
13 115 be due to true changes but may also be a result of changes in recording, including the expanding use of  
14  
15 116 computerized medical records. It was therefore necessary to adjust for year of birth. Maternal BMI,  
16  
17  
18 117 maternal smoking and gestational age (for some relevant outcomes) were included in the adjusted  
19  
20 118 analyses based on their well known association with maternal and foetal outcome.[ 26,27] Putative  
21  
22 119 confounders and intermediaries were not identified with statistical analysis. To demonstrate causality  
23  
24  
25 120 between the different outcomes evaluated in the analyses and maternal age a great number of putative  
26  
27 121 intermediaries could have been considered such as the use of fertility treatment, foetal size, gestational  
28  
29  
30 122 weight gain etc., but that was not the purpose of the study. A true confounder affects both the exposure  
31  
32 123 and the outcome. There may be other variables (which are not intermediaries) but we have not been  
33  
34 124 able to identify them. If we take for instance maternal hypertension as an example, it could be of  
35  
36  
37 125 interest. But as the higher risk of hypertension is a consequence of maternal age, it is not a true  
38  
39 126 confounder but an intermediary, a way in which high maternal age can affect obstetric and neonatal  
40  
41 127 pathology. The proportion of missing data concerning the included confounders could have affected the  
42  
43  
44 128 results. The youngest age group had the highest frequency of missing data on BMI (20.7%) and  
45  
46 129 smoking (7.7%) compared with the reference group (13.1% and 4.9%, respectively). The distribution of  
47  
48  
49 130 BMI in the youngest age group was almost equal to the other maternal age groups. One explanation for  
50  
51 131 a higher proportion of missing data in the youngest age group could be a later detection of their  
52  
53 132 pregnancies and attendance to the antenatal care and questions concerning exposure in early pregnancy  
54  
55  
56 133 were not raised. Gestational age could be calculated for more than 99% of the study subjects in this  
57  
58 134 study with just minimal variations between maternal age groups.  
59  
60

1 135 Our approach of analysing the data may be a benefit for clinicians interpreting the results when dealing  
2  
3  
4 136 with young and aged mothers.

5  
6 137 In conclusion, in a country with a highly developed social and antenatal maternity health care security  
7  
8 138 system giving cost free maternity and obstetric care to all pregnant women adolescents had a decreased  
9  
10  
11 139 risk for adverse obstetric and neonatal outcome compared with the reference group. In the same social  
12  
13 140 context childbirth at advanced maternal age was associated with a number of serious complications for  
14  
15 141 both the woman and the child. For clinicians counselling young mothers it is of great importance to  
16  
17  
18 142 highlight the positive consequences that less obstetric complications and favourable neonatal outcomes  
19  
20 143 are expected. The results imply that there is a need for individualizing the antenatal surveillance  
21  
22  
23 144 programs and obstetric care based on age grouping in order to attempt to improve the outcomes in the  
24  
25 145 age groups with less favourable obstetric and neonatal outcomes. Such changes in surveillance  
26  
27 146 programs and obstetric interventions need to be evaluated in further studies.  
28  
29

30 147  
31  
32  
33  
34  
35  
36  
37  
38  
39  
40  
41  
42  
43  
44  
45  
46  
47  
48  
49  
50  
51  
52  
53  
54  
55  
56  
57  
58  
59  
60

1  
2  
3  
4  
5  
6  
7  
8  
9  
10  
11  
12  
13  
14  
15  
16  
17  
18  
19  
20  
21  
22  
23  
24  
25  
26  
27  
28  
29  
30  
31  
32  
33  
34  
35  
36  
37  
38  
39  
40  
41  
42  
43  
44  
45  
46  
47  
48  
49  
50  
51  
52  
53  
54  
55  
56  
57  
58  
59  
60

148 **Funding:** The study was supported financially by grants from the County Council of Östergötland and  
149 Linköping University.

150 **Disclosure of interest:** None of the authors has any conflict of interest to declare.

151 **Contribution of authorship:** The study was planned and conducted by PK, MB and RBT, Data was  
152 analysed by all three. All authors contributed to the interpretation of the results, the elaboration of the  
153 manuscript and approval of the final version.

154 **Checklist:** The manuscript conforms to the STROBE requirement.

155 **Data sharing statement:** Technical appendix, statistical code, and dataset available from the  
156 corresponding author at Dryad repository, who will provide a permanent, citable and open access home  
157 for the dataset.

1 158 **REFERENCE LIST**

- 2  
3  
4 159 1. Olausson PM, Cnattingius S, Goldenberg RL. Determinants of poor pregnancy outcomes among  
5  
6 160 teenagers in Sweden. *Obstet Gynecol* 1997;89:451-7.  
7  
8  
9 161 2. Olausson PO, Cnattingius S, Haglund B. Teenage pregnancies and risk of late fetal death and  
10  
11 162 infant mortality. *Br J Obstet Gynaecol* 1999;106:116-21.  
12  
13 163 3. Chen XK, Wen SW, Fleming N, et al. Teenage pregnancy and adverse birth outcomes: a large  
14  
15 164 population based retrospective cohort study. *Int J Epidemiol* 2007;36:368-73.  
16  
17  
18 165 4. Gupta N, Kiran U, Bhal K. Teenage pregnancies: obstetric characteristics and outcome. *Eur J*  
19  
20 166 *Obstet Gynecol Reprod Biol* 2008;137:165–71.  
21  
22  
23 167 5. de Vienne CM, Creveuil C, Dreyfus M. Does young maternal age increase the risk of adverse  
24  
25 168 obstetric, fetal and neonatal outcomes: a cohort study. *Eur J Obstet Gynecol Reprod Biol*  
26  
27 169 2009;147:151–6.  
28  
29  
30 170 6. Leppälähti S, Gissler M, Mentula M, et al. Is teenage pregnancy an obstetric risk in a welfare  
31  
32 171 society? A population-based study in Finland, from 2006 to 2011. *BMJ Open*  
33  
34 172 2013;19:3:e003225.  
35  
36  
37 173 7. Lao TT, Ho LF. Obstetric outcome of teenage pregnancies. *Hum Reprod* 1998;13:3228-32.  
38  
39 174 8. Malabarey OT, Balayla J, Klam SL, et al. Pregnancies in young adolescent mothers: a  
40  
41 175 population-based study on 37 million births. *J Pediatr Adolesc Gynecol* 2012;25:98-102.  
42  
43  
44 176 9. Conde-Agudelo A, Belizán JM, Lammers C. Maternal-perinatal morbidity and mortality  
45  
46 177 associated with adolescent pregnancy in Latin America: Cross-sectional study. *Am J Obstet*  
47  
48 178 *Gynecol* 2005;192:342-9.  
49  
50  
51 179 10. Mukhopadhyay P, Chaudhuri RN, Paul B. Hospital-based perinatal outcomes and complications  
52  
53 180 in teenage pregnancy in India. *J Health Popul Nutr* 2010;28:494-500.  
54  
55  
56 181 11. Ayuba II, Gani O. Outcome of teenage pregnancy in the niger delta of Nigeria. *Ethiop J Health*  
57  
58 182 *Sci* 2012;22:45-50.  
59  
60

- 1 183 12. Jolly M, Sebire N, Harris J, et al. The risks associated with pregnancy in women aged 35 years or  
2  
3  
4 184 older. *Hum Reprod* 2000;15:2433-7.
- 5  
6 185 13. Jacobsson B, Ladfors L, Milsom I. Advanced maternal age and adverse perinatal outcome. *Obstet*  
7  
8 186 *Gynecol* 2004;104:727-33.
- 9  
10  
11 187 14. Cleary-Goldman J, Malone FD, Vidaver J, et al. Impact of maternal age on obstetric outcome.  
12  
13 188 *Obstet Gynecol* 2005;105:983-90.
- 14  
15 189 15. Joseph KS, Allen AC, Dodds L, et al. The perinatal effects of delayed child bearing. *Obstet*  
16  
17  
18 190 *Gynecol* 2005;105:1410-8.
- 19  
20 191 16. Luke B, Brown MB. Elevated risks of pregnancy complications and adverse outcomes with  
21  
22 192 increasing maternal age. *Hum Reprod* 2007;22:1264-72.
- 23  
24  
25 193 17. Delbaere I, Verstraelen H, Goetgeluk S, et al. Pregnancy outcome in primiparae of advanced  
26  
27 194 maternal age. *Eur J Obstet Gynecol Reprod Biol* 2007;135:41-6.
- 28  
29  
30 195 18. Hsieh TT, Liou JD, Hsu JJ, et al. Advanced maternal age and adverse perinatal outcomes in an  
31  
32 196 Asian population. *Eur J Obstet Gynecol Reprod Biol* 2010;148:21-6.
- 33  
34 197 19. Matsuda Y, Kawamichi Y, Hayashi K, et al. Impact of maternal age on the prevalence of  
35  
36 198 obstetrical complications in Japan. *J Obstet Gynaecol Res* 2011;37:1409-14.
- 37  
38  
39 199 20. Biro MA, Davey MA, Carolan M, et al. Advanced maternal age and obstetric morbidity for  
40  
41 200 women giving birth in Victoria, Australia: A population-based study. *Aust N Z J Obstet*  
42  
43 201 *Gynaecol*.2012;52:229-34.
- 44  
45  
46 202 21. Lindmark G, Cnattingius S. The scientific basis of antenatal care routines: Report from a state-of-  
47  
48 203 art conference. *Acta Obstet Gynecol Scand* 1991;70:105-9.
- 49  
50  
51 204 22. Källen B, Källen K, Olausson PO. The Swedish Medical Birth Register: a summary of content  
52  
53 205 and quality. Research Report, Article no: 2003-112-3. Centre for Epidemiology, National Board  
54  
55 206 of Health and Welfare Stockholm 2003. Available from:  
56  
57  
58 207 <http://www.socialstyrelsen.se/publikationer2003/2003-112-3> (Accessed May 2014.)  
59  
60

- 1 208 23. Cnattingius S, Ericson A, Gunnarskog J, et al. A quality study of a medical birth registry. *Scand J*  
2  
3  
4 209 *Soc Med* 1990;18:143-8.
- 5  
6 210 24. Axelsson O. The Swedish medical birth register. *Acta Obstet Gynecol Scand* 2003;82:491.  
7
- 8 211 25. Källén B. A birth weight for gestational age standard based on data in the Swedish Medical Birth  
9  
10 212 Registry, 1985-1989. *Eur J Epidemiol* 1995;11:601-6.
- 11  
12  
13 213 26. Cedergren MI. Maternal morbid obesity and the risk of adverse pregnancy outcome. *Obstet*  
14  
15 214 *Gynecol* 2004;103:219-24.
- 16  
17  
18 215 27. Källén K. The impact of maternal smoking during pregnancy on delivery outcome. *Eur J Public*  
19  
20 216 *Health*. 2001 Sep;11(3):329-33.
- 21  
22 217 28. Shrim A, Ates S, Mallozzi A, et al. Is young maternal age really a risk factor for adverse  
23  
24 pregnancy outcome in a Canadian tertiary referral hospital? *J Pediatr Adolesc Gynecol*  
25 218  
26  
27 219 2011;24:218-22.
- 28  
29  
30 220 29. Jivraj S, Nazzal Z, Davies P, et al. Obstetric outcome of teenage pregnancies from 2002 to 2008:  
31  
32 221 the Sheffield experience. *J Obstet Gynaecol* 2010;30:253-6.
- 33  
34 222 30. Beyer DA, Amari F, Diedrich K, et al. Teenage deliveries in Northern Germany: always a risk  
35  
36 factor for higher surgical delivery rates? *Arch Gynecol Obstet* 2011;284:535-8.
- 37 223  
38  
39 224 31. Jolly MC, Sebire N, Harris J, et al. Obstetric risks of pregnancy in women less than 18 years old.  
40  
41 225 *Obstet Gynecol* 2000;96:962-6.
- 42  
43  
44 226 32. Nelson SM, Telfer EE, Anderson RA. The ageing ovary and uterus: new biological insights. *Hum*  
45  
46 227 *Reprod Update* 2013 ;19:67-83.
- 47  
48  
49 228 33. Taddei S, Virdis A, Ghiadoni L, et al. Endothelium, aging, and hypertension. *Curr Hypertens Rep*  
50  
51 229 2006;8:84-9.
- 52  
53  
54 230  
55  
56 231  
57  
58

## 59 232 LEGENDS

60

1 233 Figure 1. Adjusted mean birth weight of neonates in singleton primiparous women in different  
2  
3  
4 234 maternal age groups. Birth weight adjusted for gestational age, maternal BMI and smoking habits, and  
5  
6 235 year of delivery. Plots indicate means and bars 95% CI.  
7  
8  
9  
10  
11  
12  
13  
14  
15  
16  
17  
18  
19  
20  
21  
22  
23  
24  
25  
26  
27  
28  
29  
30  
31  
32  
33  
34  
35  
36  
37  
38  
39  
40  
41  
42  
43  
44  
45  
46  
47  
48  
49  
50  
51  
52  
53  
54  
55  
56  
57  
58  
59  
60

For peer review only



1  
2 1  
3  
4 2 **Impact of maternal age on obstetric and neonatal outcome with**  
5  
6  
7 3 **emphasis on primiparous adolescents and older women-a Swedish**  
8  
9  
10 4 **Medical Birth Register Study.**  
11  
12  
13  
14 5

16 6 Marie Blomberg MD, PhD, Rasmus Birch Tyrberg, BMs, and Preben Kjølhede, MD, PhD  
17  
18 7 Department of Obstetrics and Gynaecology and Department of Clinical and Experimental Medicine,  
19  
20  
21 8 Linköping University, Linköping, Sweden  
22  
23  
24 9

25  
26 10 Corresponding author:

27  
28 11 Marie Blomberg, MD, PhD

29  
30 12 Department of Obstetrics and Gynaecology,

31  
32 13 University Hospital

33  
34  
35 14 581 85 Linköping

36  
37 15 Sweden

38  
39 16 Phone +46 10 103 00 00

40  
41  
42 17 E-mail: marie.blomberg@lio.se  
43  
44

45 18 Keywords: maternal age, mode of delivery, neonatal outcome, obstetric outcome, adolescents  
46

47 19 Word count: ~~3201~~3607 words  
48  
49  
50 20  
51  
52  
53 21  
54  
55 22  
56  
57  
58 23  
59  
60

## Abstract

**Objectives:** To evaluate the associations between maternal age and obstetric and neonatal outcomes in primiparous women with emphasis on teenagers and older women.

**Design:** A population-based cohort study.

**Setting:** The Swedish Medical Birth Register.

**Participants:** Primiparous women with singleton births from 1992 through 2010 (N=798,674) were divided into seven age groups: <17 years, 17-19 years, and additional five five-year classes. The reference group consisted of the women age 25-29 years.

**Primary outcome:** Obstetric and neonatal outcome.

**Results:** The teenager groups had significantly more vaginal births ([aOR](#) 2.04 (1.79-2.32) and 1.95 (1.88-2.02) for age <17 years and 17-19 years, respectively); fewer caesarean sections ([aOR](#) 0.57 (0.48-0.67) and 0.55 (0.53-0.58)), and instrumental vaginal births ([aOR](#) 0.43 (0.36-0.52) and 0.50 (0.48-0.53)) compared with the reference group. The opposite was found among older women reaching a 4-fold increased [risk-odds ratio](#) for caesarean section. The teenagers showed no increased risk of adverse neonatal outcome but presented an increased risk of prematurity <32 weeks ([aOR](#) 1.66 (1.10-2.51) and 1.20 (1.04-1.38)). Women with advancing age ( $\geq 30$  years) revealed significantly increased risk of prematurity, perineal lacerations, preeclampsia, abruption, placenta previa, postpartum haemorrhage and unfavourable neonatal outcomes compared with the reference group.

**Conclusions:** For clinicians counselling young women it is of importance to highlight the obstetrically positive consequences that fewer maternal complications and favourable neonatal outcomes are expected. [-The results imply that there is a need for individualizing the antenatal surveillance programs and obstetric care based on age grouping in order to attempt to improve the outcomes in the age groups with less favourable obstetric and neonatal outcomes. Such changes in surveillance programs and obstetric interventions need to be evaluated in further studies.](#)

1 48 | ~~There is also a need to develop surveillance programs in antenatal and obstetric care for older women~~  
2  
3  
4 49 | ~~aiming for example to detect preeclampsia earlier or recommending prophylactic uterotonic treatment~~  
5  
6 50 | ~~after birth to avoid extensive postpartum bleeding. Such interventions need to be evaluated in further~~  
7  
8 51 | ~~studies.~~  
9  
10  
11 52

For peer review only

12  
13  
14  
15  
16  
17  
18  
19  
20  
21  
22  
23  
24  
25  
26  
27  
28  
29  
30  
31  
32  
33  
34  
35  
36  
37  
38  
39  
40  
41  
42  
43  
44  
45  
46  
47  
48  
49  
50  
51  
52  
53  
54  
55  
56  
57  
58  
59  
60

## Article summary

### Impact of maternal age on obstetric and neonatal outcome with emphasis on primiparous adolescents and older women-a Swedish Medical Birth Register Study.

Strengths and limitations of this study:

- A strength of the present study is that it includes primiparous women of an entire country where the antenatal care program is equally available to all pregnant women and is comprehensive.
- Another advantage is the large number of individuals available for evaluation, which makes it possible to divide the study population into subgroups with sufficient numbers in each stratum to provide high statistical power.
- A limitation is that the external validity is reduced to facilities with similar socio-economic and demographic characteristics and health care systems with comparable standards.
- The Swedish medical birth register contain a large body of information concerning the mother and the child but only the available data in the register could be used for outcome evaluation and adjustments for putative confounders.

## 68 INTRODUCTION

69 There are a large number of studies evaluating obstetric and neonatal outcome over the full range of  
70 reproductive maternal ages, but especially with a focus on the youngest and the oldest mothers. Young  
71 mothers have been shown to be exposed to an increased risk of anaemia, low birth weight, foetal death,  
72 eclampsia and preterm birth although they at the same time were more likely to have a spontaneous  
73 normal vaginal birth and the risk of preeclampsia and post-partum haemorrhage were significantly  
74 decreased.[1-6] These studies evaluated outcomes in low-income countries. Many studies performed in  
75 low-income countries presented in recent years on the topic of teenage pregnancies have found similar  
76 obstetric and neonatal outcomes.[7-11]

77 Complications during pregnancy and birth at advanced maternal age (either defined as 35 years and  
78 older or 40 years or older) have also been evaluated in high-income countries. Advanced maternal age  
79 at birth has been found to be associated with gestational diabetes, preeclampsia, placenta previa,  
80 caesarean section (CS), placental abruption, preterm delivery, low birth weight, intrauterine foetal  
81 death and an increased perinatal mortality.[12-20] The difference in obstetric and neonatal outcomes  
82 between teenagers and women at advanced age seemed to be lower risks for several unwanted and  
83 threatening outcomes in the teenage group; thus there were no obvious advantages concerning obstetric  
84 and neonatal outcomes at advanced maternal ages. The earlier published studies concerning the impact  
85 of maternal age on perinatal outcome differ in many aspects methodologically as well as in the socio-  
86 demographic characteristics of the populations and health care systems. All these factors make  
87 interpretation of comparisons between data sets difficult.

88 Sweden has during several decades actively developed strategies in social care, education and health  
89 care in order to improve antenatal care and parenthood. In a Swedish state-of-the-art conference held in  
90 1990, the scientific basis of the routine antenatal program was critically evaluated. It was concluded  
91 that the scientific evidence to support the timing and contents of routine visits was unsatisfactory.[21]  
92 Consequently there is a constant need for evaluation both of single diagnostic procedures and

1 93 intervention and of outcomes. An analysis of perinatal outcomes in relation to maternal age in the  
2  
3  
4 94 Swedish population will provide important knowledge that may be used to further improve social,  
5  
6 95 antenatal, obstetric and neonatal care and reveals risk groups that in particular may need more attention  
7  
8 96 in the antenatal care.  
9

10  
11 97 The objective of the present study was to assess the impact of maternal age on obstetric and neonatal  
12  
13 98 outcomes among singleton primiparous women in Sweden, with special emphasis on the adolescents  
14  
15 99 and older mothers.  
16  
17  
18 100  
19  
20  
21  
22  
23  
24  
25  
26  
27  
28  
29  
30  
31  
32  
33  
34  
35  
36  
37  
38  
39  
40  
41  
42  
43  
44  
45  
46  
47  
48  
49  
50  
51  
52  
53  
54  
55  
56  
57  
58  
59  
60

## MATERIALS AND METHODS

This study analyses the obstetric and neonatal outcomes of all singleton primiparous women prospectively registered in the Swedish Medical Birth Register (MBR) who gave births from January 1, 1992 through December 31, 2010. MBR has collected information about births in Sweden since 1973.

It is compulsory for every health care provider to report to the MBR. Medical and other data on almost all (99%) births in Sweden are listed in the register, which also includes stillbirths. Starting with the first antenatal visit, usually in gestational week 10-12, the information is collected prospectively in standardized medical record forms completed at the maternity health care centers at antenatal care visits, in the birth units, and at the paediatric examination of the newborn. The standardized medical records are identical throughout the country. A description and validation of the register content is available.[22-24]

The study population was grouped according to maternal age into seven subgroups: <17 years; 17-19 years; 20-24 years, 25-29 years, 30-34 years; 35-39 years and 40+ years. In the outcome analyses we selected the group of women age 25-29 years as reference group.

The list of available variables in MBR has been extended throughout the years that the register has been active. The obstetric and neonatal outcome data for the purpose of this study are those that have been available since 1992. From 1992 until June 2008 the MBR includes stillbirths after 28 weeks of gestation and from July 2008 until 2010 all stillbirths after 22 weeks of gestation are included. Each outcome studied was either marked in the MBR or registered according to the International Statistical Classification of Diseases and Related Health Problems (ICD). The obstetric outcome variables studied were gestational age, mode of delivery; normal vaginal birth (defined as neither instrumental vaginal delivery, nor CS), CS, instrumental vaginal delivery divided into forceps and vacuum extraction, mode of onset of labour, perineal laceration, preeclampsia, abruption placentae, placenta previa, use of epidural analgesia and postpartum haemorrhage (PPH) exceeding 1000 ml. The foetal and neonatal outcomes evaluated were Apgar-score at 5 minutes, foetal distress (ICD code P20.0, P20.1 and P20.9),

1 126 aspiration of meconium (ICD code P24.0), shoulder dystocia (ICD code O66.0), and stillbirth. Small-  
2  
3  
4 127 for-gestational age (SGA) newborns were defined as those with birth weight more than 2 standard  
5  
6 128 deviations (SD) below the mean birth weight for gestational age (sex and parity specific) according to a  
7  
8 129 Swedish reference curve.[25] Large-for-gestational age (LGA) newborns were those with a birth  
9  
10  
11 130 weight above 2 SD. All descriptive and background data were extracted from the MBR. The register  
12  
13 131 information on these variables was obtained from the antenatal care center records.

14  
15  
16 132 The study was approved by the Regional Ethical Review Board in Linköping, Sweden (Dnr 2011/479-  
17  
18 133 31. Approved January 25; 2012).

### 21 134 **Statistical analysis**

22  
23 135 Data are presented as counts and per cent or mean and one SD. Logistic regression analyses were used  
24  
25 136 for comparison of groups for categorical data. Data on a continuous scale were compared using  
26  
27  
28 137 analysis of covariance (ANCOVA). Multivariate logistic regression models were used in order to adjust  
29  
30 138 comparisons for the confounding factors. Consequently crude and adjusted odds ratios (OR and aOR)  
31  
32  
33 139 and 95% confidence intervals (CIs) are reported. Maternal weight and height (used for calculation of  
34  
35 140 maternal Body Mass Index (BMI)) and smoking habits in early pregnancy (unknown, no smoking,  
36  
37 141 smoking) and year of birth were included as confounders in the adjusted analyses. The simultaneous  
38  
39  
40 142 model of including independent variables in the multivariate logistic regression was used since we  
41  
42 143 found it most appropriate for the relevance of the research goal of the study. The rationale for including  
43  
44 144 year of birth as an independent variable was that there was variability in the occurrence of obstetric and  
45  
46  
47 145 neonatal diagnoses during the observation period. This may be due to true changes but may also be a  
48  
49 146 result of changes in recording; with expanding use of computerized medical records. Maternal BMI and  
50  
51  
52 147 smoking was included as covariates in the adjusted analyses based on their well-known associations  
53  
54 148 with maternal and foetal outcome and their unequal distribution over the maternal age strata.[26,27]  
55  
56 149 BMI was included as a continuous variable as the distribution of maternal BMI was almost uniform  
57  
58  
59 150 over the maternal age strata and the association between BMI and maternal age was almost linear  
60



1 151 | (presented as means and standard deviations in Table 1). For the purpose of this study Gestational age  
2  
3  
4 152 | was added to the confounders in the analyses of CS, preeclampsia and birth weight based on their  
5  
6 153 | clinically well-known associations. The OR for instrumental vaginal delivery was calculated among  
7  
8 154 | women with vaginal births only in order to exclude women with an instrumental attempt to deliver  
9  
10  
11 155 | followed by an emergency CS. The ORs of perineal lacerations were also estimated among women  
12  
13 156 | with vaginal births only. The information concerning use of epidural analgesia was also restricted to  
14  
15 157 | vaginal births only. Epidural is an analgesic method that has been widely used in the delivery wards for  
16  
17  
18 158 | vaginal births during the entire time period. In contrast the use of epidural analgesia in CS has varied  
19  
20 159 | substantially over the time period and has almost exclusively been used in elective CS. Our purpose  
21  
22 160 | was to evaluate the odds ratio for epidural use over the maternal age strata and consequently we  
23  
24  
25 161 | selected the mode of delivery that exhibited the least variation in the use of the analgesic method over  
26  
27 162 | the time period, i.e. vaginal births.

28  
29  
30 163 | The software STATISTICA 64 version 10 (StatSoft Inc. 2300 East 14<sup>th</sup> St. Tulsa, OK 74104 USA) was  
31  
32 164 | used to carry out the statistical analyses.  
33  
34  
35 165

## RESULTS

In the period 1992 – 2010, 798,732 women were registered in the MBR as giving birth to their first child. The annual number of primiparous women giving birth varied between 34060 and 49417.

Information on maternal age was missing in 58 cases leaving 798,674 women for the analyses. The average age of primiparous women increased substantially from 26.2 years in 1992 to 28.5 in 2004; hereafter it has stayed almost constant at that level. The demographic, obstetric and neonatal data subdivided into maternal age groups are presented in Table 1 and 2.

Table 1. Descriptive data of primiparous women with singleton births in the period 1992-2010.

| Characteristics               | < 17 years<br>(n=2392) |            | 17-19 years<br>(n=29816) |            | 20-24 years<br>(n=185942) |            | 25-29 years<br>(n=300822) |            | 30-34 years<br>(n=205905) |            | 35-39 years<br>(n=63163) |            | 40+ years<br>(n=10634) |            |
|-------------------------------|------------------------|------------|--------------------------|------------|---------------------------|------------|---------------------------|------------|---------------------------|------------|--------------------------|------------|------------------------|------------|
| <i>BMI (kg/m<sup>2</sup>)</i> | <u>22.8</u>            | <u>3.7</u> | <u>23.2</u>              | <u>4.1</u> | <u>23.8</u>               | <u>4.3</u> | <u>23.7</u>               | <u>4.0</u> | <u>23.8</u>               | <u>4.0</u> | <u>24.4</u>              | <u>4.1</u> | <u>24.7</u>            | <u>4.3</u> |
| <i>BMI<sup>†</sup> class</i>  |                        |            |                          |            |                           |            |                           |            |                           |            |                          |            |                        |            |
| <18.5 kg/m <sup>2</sup>       | 135                    | 5.6%       | 1815                     | 6.1%       | 7650                      | 4.1%       | 7509                      | 2.5%       | 3847                      | 1.9%       | 918                      | 1.5%       | 133                    | 1.3%       |
| 18.5-24.9 kg/m <sup>2</sup>   | 1352                   | 56.5%      | 16823                    | 56.4%      | 104600                    | 56.3%      | 180163                    | 59.9%      | 122571                    | 59.5%      | 34439                    | 54.5%      | 5381                   | 50.1%      |
| 25.0-29.9 kg/m <sup>2</sup>   | 315                    | 13.2%      | 4687                     | 15.7%      | 33961                     | 18.3%      | 53896                     | 17.9%      | 37234                     | 18.1%      | 13310                    | 21.1%      | 2442                   | 23.0%      |
| 30.0-34.9 kg/m <sup>2</sup>   | 81                     | 3.4%       | 1327                     | 4.5%       | 10550                     | 5.7%       | 14401                     | 4.8%       | 9389                      | 4.6%       | 3575                     | 5.7%       | 683                    | 6.4%       |
| 35.0-39.9 kg/m <sup>2</sup>   | 11                     | 0.5%       | 337                      | 1.1%       | 3013                      | 1.6%       | 4070                      | 1.4%       | 2724                      | 1.3%       | 1024                     | 1.6%       | 188                    | 1.8%       |
| ≥ 40.0 kg/m <sup>2</sup>      | 4                      | 0.2%       | 87                       | 0.3%       | 904                       | 0.5%       | 1312                      | 0.4%       | 944                       | 0.5%       | 342                      | 0.5%       | 68                     | 0.6%       |
| Missing data                  | 494                    | 20.7%      | 4740                     | 15.9%      | 25264                     | 13.6%      | 39471                     | 13.1%      | 29196                     | 14.2%      | 9555                     | 15.1%      | 1739                   | 16.4%      |
| <i>Smoking<sup>†</sup></i>    |                        |            |                          |            |                           |            |                           |            |                           |            |                          |            |                        |            |
| Yes                           | 666                    | 27.8%      | 9012                     | 30.2%      | 31675                     | 17.0%      | 24676                     | 8.2%       | 13971                     | 6.8%       | 5287                     | 8.4%       | 958                    | 9.0%       |
| No                            | 1542                   | 64.5%      | 19154                    | 64.3%      | 145695                    | 78.4%      | 261348                    | 86.9%      | 178792                    | 86.8%      | 53416                    | 84.6%      | 8883                   | 83.5%      |
| Missing data                  | 184                    | 7.7%       | 1650                     | 5.5%       | 8572                      | 4.6%       | 14798                     | 4.9%       | 13142                     | 6.4%       | 4460                     | 7.0%       | 793                    | 7.5%       |
| <i>Gestational age</i>        |                        |            |                          |            |                           |            |                           |            |                           |            |                          |            |                        |            |
| Information available         | 2368                   | 99.0%      | 29715                    | 99.7%      | 185700                    | 99.9%      | 300603                    | 99.9%      | 205719                    | 99.9%      | 63098                    | 99.9%      | 10620                  | 99.9%      |
| Missing data                  | 24                     | 1.0%       | 101                      | 0.3%       | 242                       | 0.1%       | 219                       | 0.1%       | 186                       | 0.1%       | 65                       | 0.1%       | 14                     | 0.1%       |

Figures denote [mean and standard deviation](#) or counts and proportions.

BMI = body mass index.

<sup>†</sup> Reported height, weight and smoking habits at first antenatal visit.

Table 2. Obstetric and neonatal outcome characteristics of primiparous women with singleton births in the period 1992-2010.

| Characteristics                                              | Age groups             |       |                          |       |                           |       |                           |       |                           |       |                          |       |                        |       |
|--------------------------------------------------------------|------------------------|-------|--------------------------|-------|---------------------------|-------|---------------------------|-------|---------------------------|-------|--------------------------|-------|------------------------|-------|
|                                                              | < 17 years<br>(n=2392) |       | 17-19 years<br>(n=29816) |       | 20-24 years<br>(n=185942) |       | 25-29 years<br>(n=300822) |       | 30-34 years<br>(n=205905) |       | 35-39 years<br>(n=63163) |       | 40+ years<br>(n=10634) |       |
| <i>Labour:</i>                                               |                        |       |                          |       |                           |       |                           |       |                           |       |                          |       |                        |       |
| Spontaneous onset labour                                     | 2055                   | 85.9% | 25853                    | 86.7% | 158879                    | 85.4% | 251340                    | 83.6% | 163876                    | 79.6% | 45330                    | 71.2% | 6261                   | 58.9% |
| Induced labour                                               | 184                    | 7.7%  | 2528                     | 8.5%  | 17433                     | 9.4%  | 30873                     | 10.3% | 25474                     | 12.4% | 10065                    | 15.9% | 2111                   | 19.9% |
| <i>Mode of delivery:</i>                                     |                        |       |                          |       |                           |       |                           |       |                           |       |                          |       |                        |       |
| Normal vaginal birth                                         | 2030                   | 84.9% | 25096                    | 84.2% | 147082                    | 79.1% | 219993                    | 73.1% | 135099                    | 65.6% | 35112                    | 55.6% | 4724                   | 44.4% |
| Forceps                                                      | 7                      | 0.3%  | 126                      | 0.4%  | 1143                      | 0.6%  | 2166                      | 0.7%  | 1515                      | 0.7%  | 575                      | 0.9%  | 84                     | 0.8%  |
| Vacuum extraction                                            | 143                    | 6.0%  | 2090                     | 7.0%  | 18011                     | 9.7%  | 36696                     | 12.2% | 29811                     | 14.5% | 10119                    | 16.0% | 1599                   | 15.0% |
| CS <sup>‡</sup>                                              | 213                    | 8.9%  | 2500                     | 8.4%  | 19747                     | 10.6% | 42044                     | 14.0% | 39534                     | 19.2% | 17355                    | 27.5% | 4226                   | 39.7% |
| CS elective 1999-2010 †                                      | 53                     | 2.2%  | 373                      | 1.3%  | 2828                      | 1.5%  | 6973                      | 2.3%  | 7656                      | 3.7%  | 3853                     | 6.1%  | 1132                   | 10.6% |
| CS acute 1999-2010 †                                         | 73                     | 3.1%  | 882                      | 3.0%  | 7092                      | 3.8%  | 16651                     | 5.5%  | 17953                     | 8.7%  | 7826                     | 12.4% | 1798                   | 16.9% |
| <i>Gestational age:</i>                                      |                        |       |                          |       |                           |       |                           |       |                           |       |                          |       |                        |       |
| GA < 28 weeks                                                | 20                     | 0.8%  | 107                      | 0.4%  | 464                       | 0.2%  | 743                       | 0.2%  | 640                       | 0.3%  | 292                      | 0.5%  | 73                     | 0.7%  |
| GA < 32 weeks                                                | 40                     | 1.7%  | 308                      | 1.0%  | 1436                      | 0.8%  | 2415                      | 0.8%  | 2048                      | 1.0%  | 900                      | 1.4%  | 206                    | 1.9%  |
| GA < 37 weeks                                                | 213                    | 8.9%  | 1937                     | 6.5%  | 11030                     | 5.9%  | 18005                     | 5.6%  | 12727                     | 6.2%  | 4586                     | 7.3%  | 877                    | 8.2%  |
| GA 37 – 41 weeks                                             | 1990                   | 83.2% | 25811                    | 86.6% | 161043                    | 86.6% | 257320                    | 85.5% | 172621                    | 83.8% | 51494                    | 81.5% | 8786                   | 82.6% |
| GA ≥ 42 weeks                                                | 165                    | 6.9%  | 1967                     | 6.6%  | 13627                     | 7.3%  | 25278                     | 8.4%  | 20371                     | 9.9%  | 7018                     | 11.1% | 957                    | 9.0%  |
| <i>Maternal complications and use of epidural analgesia:</i> |                        |       |                          |       |                           |       |                           |       |                           |       |                          |       |                        |       |
| Perineal laceration gr 1-2*                                  | 311                    | 14.3% | 3982                     | 14.6% | 32602                     | 19.6% | 70452                     | 27.3% | 55163                     | 33.2% | 15477                    | 33.9% | 2116                   | 33.1% |
| Perineal laceration gr 3-4*                                  | 23                     | 1.1%  | 272                      | 1.0%  | 3030                      | 1.8%  | 8202                      | 3.2%  | 6846                      | 4.1%  | 1856                     | 4.1%  | 222                    | 3.5%  |
| Preeclampsia                                                 | 43                     | 1.8%  | 576                      | 1.9%  | 4317                      | 2.3%  | 6520                      | 2.2%  | 4265                      | 2.1%  | 1610                     | 2.5%  | 365                    | 3.4%  |
| Abruptio placentae                                           | 16                     | 0.7%  | 135                      | 0.5%  | 643                       | 0.3%  | 1171                      | 0.4%  | 955                       | 0.5%  | 390                      | 0.6%  | 87                     | 0.8%  |
| Placenta previa                                              | 2                      | 0.1%  | 16                       | 0.1%  | 159                       | 0.1%  | 505                       | 0.2%  | 612                       | 0.3%  | 375                      | 0.6%  | 89                     | 0.8%  |
| PPH > 1000 ml (VB)                                           | 65                     | 3.0%  | 667                      | 2.4%  | 5078                      | 3.1%  | 10931                     | 4.2%  | 9720                      | 5.9%  | 3173                     | 6.9%  | 485                    | 7.6%  |
| PPH > 1000 ml (CS)                                           | 2                      | 0.9%  | 28                       | 1.1%  | 252                       | 1.3%  | 541                       | 1.3%  | 578                       | 1.5%  | 237                      | 1.4%  | 80                     | 1.9%  |
| Epidural analgesia*                                          | 903                    | 41.4% | 11569                    | 42.4% | 68332                     | 41.1% | 105266                    | 40.7% | 70691                     | 42.5% | 20151                    | 44.0% | 2743                   | 42.9% |

Table 2 continued. Obstetric and neonatal outcome characteristics of primiparous women with singleton births in the period 1992-2010.

| Characteristics        | Age groups             |      |                          |      |                           |      |                           |      |                           |      |                          |      |                        |      |
|------------------------|------------------------|------|--------------------------|------|---------------------------|------|---------------------------|------|---------------------------|------|--------------------------|------|------------------------|------|
|                        | < 17 years<br>(n=2392) |      | 17-19 years<br>(n=29816) |      | 20-24 years<br>(n=185942) |      | 25-29 years<br>(n=300822) |      | 30-34 years<br>(n=205905) |      | 35-39 years<br>(n=63163) |      | 40+ years<br>(n=10634) |      |
| <i>Neonatal</i>        |                        |      |                          |      |                           |      |                           |      |                           |      |                          |      |                        |      |
| Foetal distress        | 8                      | 0.3% | 122                      | 0.4% | 932                       | 0.5% | 1621                      | 0.5% | 1070                      | 0.5% | 388                      | 0.6% | 56                     | 0.5% |
| Aspiration of meconium | 0                      | 0%   | 30                       | 0.1% | 363                       | 0.2% | 649                       | 0.2% | 563                       | 0.3% | 193                      | 0.3% | 42                     | 0.4% |
| Shoulder dystocia      | 6                      | 0.3% | 78                       | 0.3% | 793                       | 0.4% | 1580                      | 0.5% | 1382                      | 0.7% | 489                      | 0.8% | 79                     | 0.7% |
| Stillbirth             | 7                      | 0.3% | 102                      | 0.3% | 571                       | 0.3% | 893                       | 0.3% | 768                       | 0.4% | 347                      | 0.5% | 87                     | 0.8% |
| SGA                    | 91                     | 3.8% | 1136                     | 3.8% | 6016                      | 3.2% | 8831                      | 2.9% | 7216                      | 3.5% | 2962                     | 4.7% | 617                    | 5.8% |
| LGA                    | 47                     | 2.0% | 539                      | 1.8% | 3838                      | 2.1% | 5943                      | 2.0% | 3846                      | 1.9% | 1279                     | 2.0% | 224                    | 2.1% |
| Apgar score < 7 at 5   | 43                     | 1.8% | 381                      | 1.3% | 2409                      | 1.3% | 4158                      | 1.4% | 3354                      | 1.6% | 1274                     | 2.0% | 240                    | 2.3% |
| Birth weight (gram)    | 3348                   | 592  | 3403                     | 565  | 3453                      | 554  | 3470                      | 555  | 3452                      | 572  | 3415                     | 612  | 3360                   | 640  |

Figures denote counts and proportions or mean and one standard deviation.

BMI = body mass index; CS = caesarean section; GA = gestational age at birth; LGA = large for gestational age; PPH = postpartum haemorrhage; SGA = small for gestational age; VB = vaginal birth

‡All CS independent of status of performance – acute or elective. †Caesarean section was subdivided into elective and acute CS from 1999.

\*Epidural analgesia and perineal lacerations in vaginal births only.

1 The crude odds rates and the results of the multivariate analyses models of obstetric and neonatal  
2  
3 outcomes are shown in Table 3 and 4, respectively.  
4  
5  
6  
7  
8  
9  
10  
11  
12  
13  
14  
15  
16  
17  
18  
19  
20  
21  
22  
23  
24  
25  
26  
27  
28  
29  
30  
31  
32  
33  
34  
35  
36  
37  
38  
39  
40  
41  
42  
43  
44  
45  
46  
47  
48  
49  
50  
51  
52  
53  
54  
55  
56  
57  
58  
59  
60

For peer review only

Table 3. Obstetric outcome data in singleton primiparous women in the period 1992-2010 in relation to maternal age group.

| Characteristics          | Crude OR (95%CI) | aOR (95%CI)†     | Crude OR (95%CI) | aOR (95%CI)†     | Crude OR (95%CI) | aOR (95%CI)†     |
|--------------------------|------------------|------------------|------------------|------------------|------------------|------------------|
| <i>Labour</i>            | < 17 years       |                  | 17-19 years      |                  | 20-24 years      |                  |
| Spontaneous onset labour | 1.20 (1.07-1.35) | 1.20 (1.05-1.37) | 1.28 (1.24-1.33) | 1.26 (1.21-1.31) | 1.16 (1.14-1.17) | 1.16 (1.14-1.18) |
| Induced labour           | 0.73 (0.63-0.85) | 0.78 (0.66-0.93) | 0.81 (0.78-0.85) | 0.86 (0.82-0.90) | 0.90 (0.89-0.92) | 0.91 (0.90-0.93) |
|                          | 30 - 34 years    |                  | 35 - 39 years    |                  | 40+ years        |                  |
| Spontaneous onset labour | 0.77 (0.76-0.78) | 0.78 (0.77-0.79) | 0.50 (0.49-0.51) | 0.52 (0.51-0.54) | 0.29 (0.26-0.30) | 0.30 (0.28-0.31) |
| Induced labour           | 1.23 (1.21-1.26) | 1.19 (1.17-1.21) | 1.66 (1.62-1.70) | 1.54 (1.50-1.58) | 2.17 (2.06-2.27) | 1.97 (1.87-2.08) |
| <i>Mode of delivery</i>  | < 17 years       |                  | 17-19 years      |                  | 20-24 years      |                  |
| Normal vaginal birth     | 2.05 (1.84-2.30) | 2.04 (1.79-2.32) | 1.95 (1.89-2.02) | 1.95 (1.88-2.02) | 1.39 (1.37-1.41) | 1.39 (1.37-1.41) |
| Forceps*                 | 0.38 (0.18-0.81) | 0.41 (0.18-0.92) | 0.55 (0.46-0.64) | 0.48 (0.39-0.59) | 0.82 (0.76-0.88) | 0.77 (0.71-0.84) |
| Vacuum extraction‡       | 0.42 (0.36-0.51) | 0.43 (0.36-0.52) | 0.50 (0.48-0.53) | 0.50 (0.48-0.53) | 0.74 (0.72-0.75) | 0.74 (0.72-0.75) |
| CS. all                  | 0.60 (0.52-0.69) | 0.57 (0.48-0.67) | 0.56 (0.54-0.69) | 0.55 (0.53-0.58) | 0.73 (0.72-0.74) | 0.72 (0.71-0.74) |
| CS elective 1999-2010 †  | 0.95 (0.73-1.25) | 0.83 (0.60-1.14) | 0.53 (0.48-0.59) | 0.53 (0.47-0.60) | 0.65 (0.62-0.68) | 0.68 (0.65-0.71) |
| CS acute 1999-2010 ‡     | 0.54 (0.43-0.68) | 0.53 (0.40-0.69) | 0.52 (0.49-0.56) | 0.56 (0.52-0.61) | 0.68 (0.66-0.70) | 0.71 (0.69-0.73) |
|                          | 30 - 34 years    |                  | 35 - 39 years    |                  | 40+ years        |                  |
| Normal vaginal delivery  | 0.70 (0.69-0.71) | 0.72 (0.71-0.73) | 0.46 (0.45-0.47) | 0.48 (0.47-0.49) | 0.29 (0.28-0.31) | 0.31 (0.30-0.32) |
| Forceps*                 | 1.08 (1.01-1.15) | 1.20 (1.12-1.29) | 1.48 (1.35-1.63) | 1.66 (1.49-1.84) | 1.58 (1.27-1.98) | 1.75 (1.37-2.24) |
| Vacuum extraction‡       | 1.32 (1.30-1.34) | 1.29 (1.27-1.32) | 1.72 (1.67-1.76) | 1.67 (1.63-1.72) | 2.01 (1.90-2.13) | 1.92 (1.80-2.04) |
| CS. all                  | 1.46 (1.44-1.49) | 1.44 (1.42-1.47) | 2.34 (2.29-2.38) | 2.21 (2.16-2.26) | 4.07 (3.91-4.23) | 3.78 (3.61-3.96) |
| CS elective 1999-2010 †  | 1.63 (1.57-1.68) | 1.44 (1.39-1.49) | 2.74 (2.63-2.85) | 2.25 (2.15-2.35) | 5.03 (4.70-5.36) | 3.89 (3.61-4.20) |
| CS acute 1999-2010 ‡     | 1.63 (1.59-1.67) | 1.44 (1.40-1.47) | 2.41 (2.35-2.48) | 1.94 (1.88-2.00) | 3.47 (3.29-3.66) | 2.68 (2.52-2.85) |
| <i>Gestational age</i>   | < 17 years       |                  | 17-19 years      |                  | 20-24 years      |                  |
| GA < 28 weeks            | 3.44 (2.20-5.37) | 2.84 (1.59-5.06) | 1.46 (1.19-1.79) | 1.25 (0.97-1.62) | 1.01 (0.90-1.14) | 0.89 (0.77-1.02) |
| GA < 32 weeks            | 2.12 (1.55-2.91) | 1.66 (1.10-2.51) | 1.29 (1.15-1.46) | 1.20 (1.04-1.38) | 0.96 (0.90-1.03) | 0.92 (0.85-0.99) |
| GA < 37 weeks            | 1.55 (1.34-1.79) | 1.46 (1.24-1.72) | 1.09 (1.04-1.15) | 1.03 (0.98-1.09) | 0.99 (0.97-1.02) | 0.97 (0.95-1.00) |
| GA 37 – 41 weeks         | 0.89 (0.79-0.99) | 0.88 (0.77-0.99) | 1.11 (1.07-1.15) | 1.14 (1.09-1.18) | 1.10 (2.08-1.12) | 1.12 (1.10-1.14) |
| GA ≥ 42 weeks            | 0.82 (0.70-0.96) | 0.89 (0.75-1.06) | 0.77 (0.74-0.81) | 0.79 (0.74-0.83) | 0.86 (0.84-0.88) | 0.85 (0.83-0.87) |
|                          | 30 - 34 years    |                  | 35 - 39 years    |                  | 40+ years        |                  |
| GA < 28 weeks            | 1.26 (1.13-1.40) | 1.17 (1.04-1.33) | 1.88 (1.64-2.15) | 1.61 (1.40-1.90) | 2.79 (2.19-3.56) | 2.48 (1.86-3.29) |
| GA < 32 weeks            | 1.24 (1.17-1.32) | 1.24 (1.16-1.33) | 1.79 (1.65-1.93) | 1.68 (1.53-1.84) | 2.44 (2.12-2.82) | 2.25 (1.90-2.66) |
| GA < 37 weeks            | 1.04 (1.01-1.06) | 1.02 (0.99-1.05) | 1.23 (1.19-1.27) | 1.19 (1.15-1.24) | 1.41 (1.32-1.52) | 1.37 (1.26-1.48) |
| GA 37 – 41 weeks         | 0.88 (0.86-0.89) | 0.89 (0.86-0.89) | 0.75 (0.73-0.76) | 0.76 (0.74-0.78) | 0.81 (0.77-0.85) | 0.83 (0.79-0.88) |
| GA ≥ 42 weeks            | 1.20 (1.17-1.22) | 1.20 (1.18-1.23) | 1.36 (1.33-1.40) | 1.35 (1.31-1.39) | 1.08 (1.01-1.15) | 1.06 (0.98-1.14) |

Table 3 continued. Obstetric outcome data in singleton primiparous women in the period 1992-2010 in relation to maternal age group.

| Characteristics                                              | Crude OR (95%CI) | aOR (95%CI)†     | Crude OR (95%CI) | aOR (95%CI)†     | Crude OR (95%CI) | aOR (95%CI)†     |
|--------------------------------------------------------------|------------------|------------------|------------------|------------------|------------------|------------------|
| <i>Maternal complications and use of epidural analgesia:</i> |                  |                  |                  |                  |                  |                  |
|                                                              | < 17 years       |                  | 17-19 years      |                  | 20-24 years      |                  |
| Perineal laceration grade 1-2‡                               | 0.44 (0.39-0.50) | 0.44 (0.38-0.50) | 0.46 (0.44-0.47) | 0.47 (0.45-0.49) | 0.65 (0.64-0.66) | 0.68 (0.67-0.69) |
| Perineal laceration grade 3-4‡                               | 0.33 (0.22-0.49) | 0.39 (0.25-0.60) | 0.31 (0.25-0.37) | 0.37 (0.32-0.42) | 0.57 (0.54-0.59) | 0.61 (0.58-0.64) |
| Preeclampsia                                                 | 0.83 (0.61-1.12) | 0.89 (0.62-1.27) | 0.89 (0.82-0.97) | 0.93 (0.84-1.02) | 1.07 (1.03-1.12) | 1.01 (0.96-1.05) |
| Abruptio placentae                                           | 1.72 (1.05-2.83) | 1.76 (1.03-3.00) | 1.16 (0.97-1.39) | 1.02 (0.83-1.26) | 0.89 (0.81-0.98) | 0.83 (0.74-0.92) |
| Placenta praevia                                             | 0.50 (0.12-2.00) | 0.57 (0.14-2.30) | 0.32 (0.19-0.53) | 0.28 (0.16-0.50) | 0.52 (0.43-0.61) | 0.52 (0.43-0.63) |
| PPH > 1000 ml (VB)                                           | 0.70 (0.54-0.89) | 0.65 (0.48-0.88) | 0.57 (0.53-0.61) | 0.64 (0.59-0.70) | 0.71 (0.69-0.74) | 0.78 (0.75-0.81) |
| PPH > 1000 ml (CS)                                           | 0.73 (0.18-2.93) | 0.52 (0.07-3.74) | 0.87 (0.59-1.27) | 1.16 (0.77-1.93) | 0.99 (0.92-1.07) | 1.09 (0.93-1.28) |
| Epidural analgesia‡                                          | 1.03 (0.95-1.12) | 1.03 (0.93-1.13) | 1.07 (1.06-1.08) | 1.07 (1.04-1.10) | 1.02 (1.01-1.03) | 1.03 (1.01-1.04) |
|                                                              | 30 - 34 years    |                  | 35 - 39 years    |                  | 40+ years        |                  |
| Perineal laceration grade 1-2‡                               | 1.33 (1.31-1.34) | 1.11 (1.10-1.13) | 1.37 (1.34-1.40) | 1.08 (1.05-1.10) | 1.32 (1.25-1.39) | 1.00 (0.94-1.07) |
| Perineal laceration grade 3-4‡                               | 1.31 (1.27-1.36) | 1.16 (1.12-1.20) | 1.29 (1.23-1.36) | 1.12 (1.05-1.18) | 1.10 (0.96-1.26) | 0.88 (0.75-1.02) |
| Preeclampsia                                                 | 0.95 (0.92-0.99) | 1.07 (1.03-1.12) | 1.18 (1.12-1.25) | 1.30 (1.22-1.39) | 1.60 (1.44-1.79) | 1.83 (1.62-2.06) |
| Abruptio placentae                                           | 1.19 (1.09-1.30) | 1.27 (1.16-1.40) | 1.59 (1.42-1.78) | 1.71 (1.50-1.94) | 2.11 (1.70-2.63) | 2.09 (1.62-2.71) |
| Placenta praevia                                             | 1.77 (1.58-1.99) | 1.74 (1.53-2.00) | 3.55 (3.11-4.06) | 3.47 (2.99-4.03) | 5.02 (4.00-6.29) | 5.23 (4.08-6.70) |
| PPH > 1000 ml (VB)                                           | 1.41 (1.37-1.45) | 1.27 (1.23-1.31) | 1.69 (1.62-1.76) | 1.47 (1.40-1.53) | 1.86 (1.69-2.05) | 1.48 (1.26-1.52) |
| PPH > 1000 ml (CS)                                           | 1.14 (1.01-1.28) | 1.04 (0.91-1.18) | 1.06 (0.91-1.24) | 0.95 (0.81-1.12) | 1.48 (1.17-1.88) | 1.35 (1.05-1.73) |
| Epidural analgesia‡                                          | 1.08 (1.06-1.09) | 1.03 (1.02-1.05) | 1.14 (1.12-1.17) | 1.06 (1.04-1.09) | 1.10 (1.04-1.15) | 0.98 (0.93-1.03) |

Reference group: Maternal age 25-29 years.

CI = confidence intervals; CS = Caesarean section; GA = gestational age at delivery; N/A = not applicable; aOR = adjusted odds ratio; PPH = postpartum haemorrhage; VD = vaginal birth.

† Adjusted for maternal BMI and smoking habits at first antenatal care visit and year of birth. CS and preeclampsia also adjusted for gestational age. ‡ Caesarean section was subdivided into elective and acute CS from 1999. § Forceps, vacuum extraction, epidural analgesia and perineal lacerations among vaginally delivered women.



Table 4. Neonatal outcome data in singleton primiparous women in the period 1992-2010 in relation to maternal age group.

| Characteristics                | Crude OR (95%CI) |                  | aOR (95%CI) <sup>†</sup> |                  | Crude OR (95%CI) |                  | aOR (95%CI) <sup>†</sup> |  |
|--------------------------------|------------------|------------------|--------------------------|------------------|------------------|------------------|--------------------------|--|
|                                | < 17 years       |                  | 17-19 years              |                  | 20-24 years      |                  | 30 - 34 years            |  |
| Foetal distress                | 0.62 (0.31-1.24) | 0.52 (0.22-1.26) | 0.76 (0.63-0.91)         | 0.63 (0.51-0.79) | 0.93 (0.86-1.01) | 0.79 (0.72-0.91) |                          |  |
| Aspiration of meconium         | N/A              | N/A              | 0.47 (0.32-0.67)         | 0.46 (0.31-0.70) | 0.90 (0.80-1.03) | 0.93 (0.81-1.07) |                          |  |
| Shoulder dystocia <sup>‡</sup> | 0.45 (0.11-1.82) | 0.32(0.05-2.29)  | 0.74 (0.58-0.90)         | 0.74 (0.52-1.07) | 1.01 (0.88-1.16) | 1.00 (0.86-1.16) |                          |  |
| Stillbirth                     | 0.99 (0.47-2.08) | 0.58 (0.19-1.80) | 1.15 (0.94-1.42)         | 0.97 (0.75-1.25) | 1.03 (0.93-1.15) | 0.98 (0.87-1.11) |                          |  |
| SGA                            | 1.32 (1.07-1.63) | 1.00 (0.78-1.28) | 1.31 (1.23-1.40)         | 1.01 (0.94-1.09) | 1.11 (1.07-1.14) | 1.00 (0.96-1.04) |                          |  |
| LGA                            | 1.01 (0.75-1.34) | 1.08 (0.76-1.53) | 0.92 (0.84-1.00)         | 1.03 (0.94-1.14) | 1.05 (1.00-1.09) | 1.05 (1.00-1.10) |                          |  |
| Apgar score < 7 at 5 minutes   | 1.31 (0.96-1.77) | 1.30 (0.91-1.86) | 0.92 (0.83-1.03)         | 0.92 (0.81-1.11) | 0.93 (0.89-0.99) | 0.93 (0.88-0.98) |                          |  |
|                                |                  |                  | 35 - 39 years            |                  | 40+ years        |                  |                          |  |
| Foetal distress                | 0.96 (0.89-1.04) | 1.23 (1.13-1.35) | 1.14 (1.02-1.27)         | 1.51 (1.33-1.72) | 0.98 (0.75-1.28) | 1.60 (1.20-2.13) |                          |  |
| Aspiration of meconium         | 1.27 (1.13-1.42) | 1.36 (1.20-1.54) | 1.42 (1.21-1.67)         | 1.48 (1.24-1.77) | 1.83 (1.34-2.51) | 1.82 (1.28-2.58) |                          |  |
| Shoulder dystocia <sup>‡</sup> | 1.18 (1.04-1.35) | 1.13 (0.90-1.41) | 1.13 (0.91-1.39)         | 1.13 (0.91-1.41) | 1.47 (0.93-2.33) | 1.27 (0.76-2.12) |                          |  |
| Stillbirth                     | 1.26 (1.14-1.38) | 1.25 (1.12-1.39) | 1.85 (1.64-2.10)         | 1.72 (1.49-1.99) | 2.77 (2.22-3.46) | 2.34 (1.80-3.03) |                          |  |
| SGA                            | 1.20 (1.16-1.24) | 1.24 (1.20-1.28) | 1.63 (1.56-1.70)         | 1.65 (1.58-1.73) | 2.04 (1.87-2.22) | 2.06 (1.87-2.26) |                          |  |
| LGA                            | 0.94 (0.91-0.98) | 0.94 (0.90-0.98) | 1.03 (0.97-1.09)         | 0.97 (0.91-1.04) | 1.07 (0.93-1.22) | 0.94 (0.81-1.09) |                          |  |
| Apgar score < 7 at 5 minutes   | 1.18 (1.13-1.24) | 1.18 (1.12-1.24) | 1.47 (1.38-1.56)         | 1.39 (1.29-1.49) | 1.65 (1.44-1.88) | 1.51 (1.30-1.75) |                          |  |

Reference group: Maternal age 25-29 years.

CI = confidence interval; LGA = large for gestational age; N/A = not applicable; aOR = adjusted odds ratio; SGA = small for gestational age

<sup>†</sup> Adjusted for maternal BMI and smoking habits at first antenatal care visit and year of birth

<sup>‡</sup> Shoulder dystocia among vaginal delivered women.

### ***Mode of delivery, obstetric and neonatal outcome of adolescents***

Compared with the reference group the teenagers had a significantly higher likelihood of having spontaneous onset of labour and of having a normal vaginal delivery. Teenagers also demonstrated a significantly higher risk of giving birth prematurely. However, only the group of teenagers younger than 17 years of age had an increased risk of giving birth very prematurely i.e. before 28 weeks of gestational age, and the same group revealed a significantly higher risk of placental abruption. In contrast with these observations the teenagers were delivered instrumentally and by CS significantly less often, and the vaginal births caused significantly fewer perineal lacerations (only evaluated among women who delivered vaginally) and PPH > 1000 ml. Likewise the occurrence of placenta previa was seen less often among teenagers whereas the occurrence of preeclampsia was equal to that seen in the reference group.

Concerning the foetal and neonatal outcomes for adolescents the newborns were less likely to show foetal distress and meconium aspiration in spite of a similar occurrence of Apgar score < 7 at 5 minutes. The newborns of the adolescents were not more prone to being stillborn or being SGA than the newborns of women in the reference group. The adjusted mean birth weight of newborns of adolescents did not differ significantly from that of women up to 29 years of age (Figure 1).

### ***Mode of delivery, obstetric and neonatal outcome of women 20-24 years of age***

The young women, 20 – 24 years of age, differed in some aspects from the reference group as well as from the adolescents. They were less likely to be delivered prematurely and had a lower frequency of placental abruption. Otherwise the obstetric and neonatal outcomes were similarly favourable as those observed for the adolescents in comparison with the reference group.

### ***Mode of delivery, obstetric and neonatal outcome of women older than 29 years of age***

As shown in Table 3 compared with the reference group almost all obstetric outcome variables demonstrated a continuously progressive deterioration with increasing age. The likelihood of normal

1 25 vaginal births decreased; induced labour, instrumental deliveries and CS increased as well as  
2  
3  
4 26 prematurity including very premature deliveries. The risk of perineal laceration increased moderately  
5  
6 27 whereas the risk of PPH > 1000 ml in vaginal births -was more pronounced. The likelihood of the  
7  
8 28 pregnancy complications preeclampsia, abruptio placenta and placenta previa was also higher in the  
9  
10 29 older age groups and progressed substantially with increasing age. Similarly, the foetal and neonatal  
11  
12 30 outcome was adversely progressively influenced by increasing maternal age. With increasing maternal  
13  
14 31 age over 30 years significantly more neonates were SGA, showed foetal distress, had Apgar score < 7  
15  
16 32 at 5 minutes or meconium aspiration, or were stillborn. The mean birth weight of the neonates also  
17  
18 33 decreased significantly with increasing maternal age after the age of 30 (Figure 1).  
19  
20  
21  
22  
23 34  
24  
25  
26  
27  
28  
29  
30  
31  
32  
33  
34  
35  
36  
37  
38  
39  
40  
41  
42  
43  
44  
45  
46  
47  
48  
49  
50  
51  
52  
53  
54  
55  
56  
57  
58  
59  
60

## DISCUSSION

This Swedish nation-wide population-based study with prospectively collected data concerning singleton primiparous women showed that the mode of delivery differed over the maternal age strata. Significantly more normal vaginal deliveries and fewer CS and instrumental vaginal deliveries were seen among the teenagers and among women aged 20-24 compared with the reference group of women aged 25-29. The opposite was found among older women reaching a 4-fold increased risk for CS compared with women aged 20-24. The teenagers as well as women aged 20-24 were less prone to perineal lacerations and PPH exceeding 1000 ml. Prematurity (< 28 weeks of GA) was associated with very low maternal age (<17 years) among the adolescents although the increased risk was at the same level as among women aged 40 years and above, indicating a u-shaped risk curve. Adolescents were not afflicted more by preeclampsia than the reference women whereas the risk of preeclampsia increased significantly with advancing maternal age. The risk of placenta praevia increased dramatically with maternal age, actually a 500% increased risk was found after the age of 40 compared with the reference group. There was a significantly increased risk of stillbirth, SGA and low Apgar score only in women aged 30 years and over.

The most prominent difference between the findings in the present study and earlier studies is that no increased risk for SGA was found among the adolescents and young mothers 20-24 years of age compared with the reference women.[8-9] It must be kept in mind that the definition of SGA may differ between countries. In the United States and Latin America SGA is usually defined as birth weight below the 10<sup>th</sup> percentile compared with two SD in the Nordic countries.[3, 9] Adjusted risks for SGA among teenagers, recently presented from Finland, one of the Nordic countries, showed no increased risk among the youngest mothers.[6] In that study the control group was defined in the same way as in the present study [but the Finnish study did not adjust for smoking habits. We found that smoking in early pregnancy was a significant independent risk factor for SGA in all age groups but it was only in the young women below 25 years of age that the adjustment of smoking turned the statistically](#)

1 60 [significant crude ORs into non-significant adjusted OR values. The contrary was found for the older](#)  
2  
3  
4 61 [women where the already significant crude ORs for SGA even became increased. This observation](#)  
5  
6 62 [may support a biological explanation for SGA in the older women.](#) Differences concerning the risk for  
7  
8 63 SGA could also be attributable to differences in socio-economic status. Chen et al. restricted their  
9  
10 64 analysis to white married mothers with age-appropriate education level, adequate prenatal care, without  
11  
12 65 smoking and alcohol use during pregnancy but found the increased risk for SGA to persist.[3] Several  
13  
14 66 studies have shown low infant birth weight for adolescents as well as for mothers with advancing  
15  
16 67 age.[18, 14, [2628](#), [2729](#)] We failed to find such association among the adolescents, but in women with  
17  
18 68 advancing age the difference in birth weight was statistically significant although the difference lacked  
19  
20 69 clinical significance.  
21  
22  
23  
24  
25 70 The finding of a preferable birth outcome with lower CS rates and lower rates of instrumental delivery  
26  
27 71 among teenagers compared with older women has been pinpointed to a lesser extent than observed  
28  
29 72 adverse outcomes. Earlier studies have shown relatively consistent results concerning a decreased rate  
30  
31 73 of CS in the adolescent group and a higher rate in women with advancing age.[6, 8, 9, 12-18] We were  
32  
33 74 able to evaluate elective and emergency CS separately and the risks among the teenagers and mothers  
34  
35 75 age 20-24 years were decreased for both types. This might indicate that the different risks concerning  
36  
37 76 CS among young and older mothers could not exclusively be explained by more CS on maternal  
38  
39 77 request among older mothers but may even be caused by biological factors. A low rate of instrumental  
40  
41 78 deliveries and CS among adolescents and a high rate among older women have almost unanimously  
42  
43 79 been shown in several reports from high-income as well as low-income countries.[5, 7, 12-18, [2628](#)-  
44  
45 80 [2931](#)] Whether this phenomenon depends on differences in handling the delivery, inherent or cultural  
46  
47 81 behavioural, domestic or social attitudes among the obstetric staff or biological factors has not been  
48  
49 82 investigated. Advancing age is associated with impaired uterine contractility as well as endothelial  
50  
51 83 dysfunction which theoretically may lead to impaired uterine and utero-placental function.[[3032](#), [3133](#)]  
52  
53 84 The fact that adolescents in our study had a lower risk of induction of labour, perineal laceration, PPH,  
54  
55  
56  
57  
58  
59  
60

1 85 | abruption (except for the very young women) and placenta previa and women with advancing age had  
2  
3  
4 86 | higher risks of all these outcomes including preeclampsia could support a biological explanation.  
5  
6 87 | Concerning prematurity the age related risk curve was U shaped. This may also support a biological  
7  
8 88 | aetiology; immaturity of the uterus in the very young women that obstruct development of a term  
9  
10  
11 89 | pregnancy and uterine dysfunction caused by ageing processes in women with advancing age and  
12  
13 90 | consequently deliver prematurely in both situations. The neonatal outcomes followed almost the same  
14  
15 91 | pattern; foetal distress, meconium aspiration, stillbirth, SGA and low Apgar score were exclusively  
16  
17  
18 92 | attributed to women older than 29.  
19  
20 93 | The strength of this study is that it deals with the outcomes in the population of an entire country where  
21  
22 94 | the antenatal care program is equally available to all pregnant women and is comprehensive. In Sweden  
23  
24  
25 95 | pregnant women have completely cost free access to antenatal and obstetric facilities; poverty and  
26  
27 96 | malnutrition are practically non-existent and the vast majority of women attends the antenatal care  
28  
29  
30 97 | program (99%) independent of socio-economic status and is delivered in obstetric units.[21] This  
31  
32 98 | context is valid for the whole study period. Another advantage is the large number of individuals  
33  
34 99 | available for evaluation, which makes it possible to divide the study population into subgroups with  
35  
36  
37 100 | sufficient numbers in each stratum to provide high statistical power. A sufficient number of study  
38  
39 101 | subjects made it possible to evaluate three subgroups of young maternal age. Only primiparous women  
40  
41 102 | were included in order to avoid the confounding effects of factors associated with subsequent  
42  
43  
44 103 | deliveries. There are limitations that should be considered. The external validity is reduced to facilities  
45  
46 104 | with similar socio-economic and demographic characteristics and health care systems with comparable  
47  
48  
49 105 | standards. The drawback is obvious given the large size of the study and the numbers of health care  
50  
51 106 | units involved that the criteria for diagnosis (ICD codes) to define outcomes may not be uniform across  
52  
53 107 | the study population but the variation is most likely not related to maternal age. The MBR contain a  
54  
55  
56 108 | large body of information concerning the mother and the child which made it possible to adjust the  
57  
58 109 | results for confounding factors. At the same time this is a limitation as only the data available in the  
59  
60

1 110 register could be used for adjustments. The register lacks information on ethnicity and socio-economic  
2  
3  
4 111 status. Our effort was to evaluate obstetric and neonatal outcome in different maternal age groups  
5  
6 112 compared with women aged 25-29 overall. The only stratifications made were for year of birth,  
7  
8 113 maternal BMI and smoking in early pregnancy. The data on year of birth showed that there is  
9  
10  
11 114 variability in the existence of obstetric and neonatal diagnoses during the observation period. This may  
12  
13 115 be due to true changes but may also be a result of changes in recording, including the expanding use of  
14  
15 116 computerized medical records. It was therefore necessary to adjust for year of birth. Maternal BMI,  
16  
17  
18 117 maternal smoking and gestational age (for some relevant outcomes) were included in the adjusted  
19  
20 118 analyses based on their well known association with maternal and foetal outcome.<sup>[32 26,27]</sup> Putative  
21  
22 119 confounders and intermediaries were not identified with statistical analysis. -To demonstrate causality  
23  
24  
25 120 between the different outcomes evaluated in the analyses and maternal age a great number of putative  
26  
27 121 intermediaries could have been considered such as the use of fertility treatment, foetal size, gestational  
28  
29  
30 122 weight gain etc., but that was not the purpose of the study. A true confounder affects both the exposure  
31  
32 123 and the outcome. There may be other variables (which are not intermediaries) but we have not been  
33  
34 124 able to identify them. If we take for instance maternal hypertension as an example, it could be of  
35  
36  
37 125 interest. But as the higher risk of hypertension is a consequence of maternal age, it is not a true  
38  
39 126 confounder but an intermediary, a way in which high maternal age can affect obstetric and neonatal  
40  
41 127 pathology. The proportion of missing data concerning the included confounders could have affected the  
42  
43  
44 128 results. The youngest age group had the highest frequency of missing data on BMI (20.7%) and  
45  
46 129 smoking (7.7%) compared with the reference group (13.1% and 4.9%, respectively). The distribution of  
47  
48  
49 130 BMI in the youngest age group was almost equal to the other maternal age groups. One explanation for  
50  
51 131 a higher proportion of missing data in the youngest age group could be a later detection of their  
52  
53 132 pregnancies and attendance to the antenatal care and questions concerning exposure in early pregnancy  
54  
55  
56 133 were not raised. Gestational age could be calculated for more than 99% of the study subjects in this  
57  
58 134 study with just minimal variations between maternal age groups.  
59  
60

1 135 Our approach of analysing the data may be a benefit for clinicians interpreting the results when dealing  
2  
3  
4 136 with young and aged mothers.  
5

6 137  
7  
8 138 In conclusion, in a country with a highly developed social and antenatal maternity health care security  
9  
10  
11 139 system giving cost free maternity and obstetric care to all pregnant women adolescents had a decreased  
12  
13 140 risk for adverse obstetric and neonatal outcome compared with the reference group. In the same social  
14  
15 141 context childbirth at advanced maternal age was associated with a number of serious complications for  
16  
17  
18 142 both the woman and the child. For clinicians counselling young mothers it is of great importance to  
19  
20 143 highlight the positive consequences that less obstetric complications and favourable neonatal outcomes  
21  
22 144 are expected. The results imply that there is a need for individualizing the antenatal surveillance  
23  
24  
25 145 programs and obstetric care based on age grouping in order to attempt to improve the outcomes in the  
26  
27 146 age groups with less favourable obstetric and neonatal outcomes. Such changes in surveillance  
28  
29  
30 147 programs and obstetric interventions need to be evaluated in further studies. ~~There is also a need to~~  
31  
32 148 ~~develop surveillance programs in antenatal and obstetric care for older women aiming to prevent and~~  
33  
34 149 ~~protect the increased risks of adverse outcomes for example to earlier detect preeclampsia or~~  
35  
36  
37 150 ~~recommending prophylactic uterotonic treatment after birth to avoid extensive postpartum bleeding.~~  
38  
39 151 ~~Such interventions need to be evaluated in well designed prospective studies.~~  
40  
41  
42 152  
43  
44  
45  
46  
47  
48  
49  
50  
51  
52  
53  
54  
55  
56  
57  
58  
59  
60



1  
2  
3  
4  
5  
6  
7  
8  
9  
10  
11  
12  
13  
14  
15  
16  
17  
18  
19  
20  
21  
22  
23  
24  
25  
26  
27  
28  
29  
30  
31  
32  
33  
34  
35  
36  
37  
38  
39  
40  
41  
42  
43  
44  
45  
46  
47  
48  
49  
50  
51  
52  
53  
54  
55  
56  
57  
58  
59  
60

**Funding:** The study was supported financially by grants from the County Council of Östergötland and Linköping University.

**Disclosure of interest:** None of the authors has any conflict of interest to declare.

**Contribution of authorship:** The study was planned and conducted by PK, MB and RBT, Data was analysed by all three. All authors contributed to the interpretation of the results, the elaboration of the manuscript and approval of the final version.

**Checklist:** The manuscript conforms to the STROBE requirement.

**Data sharing statement:** Technical appendix, statistical code, and dataset available from the corresponding author at Dryad repository, who will provide a permanent, citable and open access home for the dataset.

1 163 **REFERENCE LIST**

- 2  
3  
4 164 1. Olausson PM, Cnattingius S, Goldenberg RL. Determinants of poor pregnancy outcomes among  
5  
6 165 teenagers in Sweden. *Obstet Gynecol* 1997;89:451-7.  
7  
8 166 2. Olausson PO, Cnattingius S, Haglund B. Teenage pregnancies and risk of late fetal death and  
9  
10  
11 167 infant mortality. *Br J Obstet Gynaecol* 1999;106:116-21.  
12  
13 168 3. Chen XK, Wen SW, Fleming N, et al. Teenage pregnancy and adverse birth outcomes: a large  
14  
15 169 population based retrospective cohort study. *Int J Epidemiol* 2007;36:368-73.  
16  
17  
18 170 4. Gupta N, Kiran U, Bhal K. Teenage pregnancies: obstetric characteristics and outcome. *Eur J*  
19  
20 171 *Obstet Gynecol Reprod Biol* 2008;137:165–71.  
21  
22  
23 172 5. de Vienne CM, Creveuil C, Dreyfus M. Does young maternal age increase the risk of adverse  
24  
25 173 obstetric, fetal and neonatal outcomes: a cohort study. *Eur J Obstet Gynecol Reprod Biol*  
26  
27 174 2009;147:151–6.  
28  
29  
30 175 6. Leppälähti S, Gissler M, Mentula M, et al. Is teenage pregnancy an obstetric risk in a welfare  
31  
32 176 society? A population-based study in Finland, from 2006 to 2011. *BMJ Open*  
33  
34 177 2013;19:3:e003225.  
35  
36  
37 178 7. Lao TT, Ho LF. Obstetric outcome of teenage pregnancies. *Hum Reprod* 1998;13:3228-32.  
38  
39 179 8. Malabarey OT, Balayla J, Klam SL, et al. Pregnancies in young adolescent mothers: a  
40  
41 180 population-based study on 37 million births. *J Pediatr Adolesc Gynecol* 2012;25:98-102.  
42  
43  
44 181 9. Conde-Agudelo A, Belizán JM, Lammers C. Maternal-perinatal morbidity and mortality  
45  
46 182 associated with adolescent pregnancy in Latin America: Cross-sectional study. *Am J Obstet*  
47  
48 183 *Gynecol* 2005;192:342-9.  
49  
50  
51 184 10. Mukhopadhyay P, [Chaudhuri RN](#), [Paul B](#). Hospital-based perinatal outcomes and complications  
52  
53 185 in teenage pregnancy in India. *J Health Popul Nutr* 2010;28:494-500.  
54  
55  
56 186 11. [Ayuba II](#), [Gani O](#). Outcome of teenage pregnancy in the niger delta of Nigeria. *Ethiop J Health*  
57  
58 187 *Sci* 2012;22:45-50.  
59  
60

- 1 188 | 12. Jolly M, [Sebire N](#), [Harris J](#), et al. The risks associated with pregnancy in women aged 35 years or  
2  
3  
4 189 | older. *Hum Reprod* 2000;15:2433-7.  
5  
6 190 | 13. Jacobsson B, Ladfors L, Milsom I. Advanced maternal age and adverse perinatal outcome. *Obstet*  
7  
8 191 | *Gynecol* 2004;104:727-33.  
9  
10  
11 192 | 14. Cleary-Goldman J, Malone FD, Vidaver J, et al. Impact of maternal age on obstetric outcome.  
12  
13 193 | *Obstet Gynecol* 2005;105:983-90.  
14  
15 194 | 15. Joseph KS, Allen AC, Dodds L, et al. The perinatal effects of delayed child bearing. *Obstet*  
16  
17  
18 195 | *Gynecol* 2005;105:1410-8.  
19  
20 196 | 16. Luke B, Brown MB. Elevated risks of pregnancy complications and adverse outcomes with  
21  
22  
23 197 | increasing maternal age. *Hum Reprod* 2007;22:1264-72.  
24  
25 198 | 17. Delbaere I, Verstraelen H, Goetgeluk S, et al. Pregnancy outcome in primiparae of advanced  
26  
27 199 | maternal age. *Eur J Obstet Gynecol Reprod Biol* 2007;135:41-6.  
28  
29  
30 200 | 18. Hsieh TT, Liou JD, Hsu JJ, et al. Advanced maternal age and adverse perinatal outcomes in an  
31  
32 201 | Asian population. *Eur J Obstet Gynecol Reprod Biol* 2010;148:21-6.  
33  
34 202 | 19. Matsuda Y, Kawamichi Y, Hayashi K, et al. Impact of maternal age on the prevalence of  
35  
36  
37 203 | obstetrical complications in Japan. *J Obstet Gynaecol Res* 2011;37:1409-14.  
38  
39 204 | 20. Biro MA, Davey MA, Carolan M, et al. Advanced maternal age and obstetric morbidity for  
40  
41 205 | women giving birth in Victoria, Australia: A population-based study. *Aust N Z J Obstet*  
42  
43  
44 206 | *Gynaecol*.2012;52:229-34.  
45  
46 207 | 21. Lindmark G, Cnattingius S. The scientific basis of antenatal care routines: Report from a state-of-  
47  
48  
49 208 | art conference. *Acta Obstet Gynecol Scand* 1991;70:105-9.  
50  
51 209 | 22. Källen B, Källen K, Olausson PO. The Swedish Medical Birth Register: a summary of content  
52  
53 210 | and quality. Research Report, Article no: 2003-112-3. Centre for Epidemiology, National Board  
54  
55  
56 211 | of Health and Welfare Stockholm 2003. Available from:  
57  
58 212 | <http://www.socialstyrelsen.se/publikationer2003/2003-112-3> (Accessed May 2014.)  
59  
60

- 1 213 23. Cnattingius S, Ericson A, Gunnarskog J, et al. A quality study of a medical birth registry. Scand J  
2  
3  
4 214 Soc Med 1990;18:143-8.  
5  
6 215 24. Axelsson O. The Swedish medical birth register. Acta Obstet Gynecol Scand 2003;82:491.  
7  
8 216 25. Källén B. A birth weight for gestational age standard based on data in the Swedish Medical Birth  
9  
10  
11 217 Registry, 1985-1989. Eur J Epidemiol 1995;11:601-6.  
12  
13 218  
14  
15 219 26. Cedergren MI. Maternal morbid obesity and the risk of adverse pregnancy outcome. Obstet  
16  
17  
18 220 Gynecol 2004;103:219-24.  
19  
20 221 27. Källén K. The impact of maternal smoking during pregnancy on delivery outcome. Eur J Public  
21  
22 Health. 2001 Sep;11(3):329-33.  
23 222  
24  
25 223 ~~25-28.~~ Shrim A, Ates S, Mallozzi A, et al. Is young maternal age really a risk factor for adverse  
26  
27 224 pregnancy outcome in a Canadian tertiary referral hospital? J Pediatr Adolesc Gynecol  
28  
29  
30 225 2011;24:218-22.  
31  
32 226 ~~26-29.~~ Jivraj S, Nazzal Z, Davies P, et al. Obstetric outcome of teenage pregnancies from 2002 to  
33  
34 227 2008: the Sheffield experience. J Obstet Gynaecol 2010;30:253-6.  
35  
36  
37 228 ~~27-30.~~ Beyer DA, Amari F, Diedrich K, et al. Teenage deliveries in Northern Germany: always a  
38  
39 229 risk factor for higher surgical delivery rates? Arch Gynecol Obstet 2011;284:535-8.  
40  
41 230 ~~28-31.~~ Jolly MC, Sebire N, Harris J, et al. Obstetric risks of pregnancy in women less than 18  
42  
43  
44 231 years old. Obstet Gynecol 2000;96:962-6.  
45  
46 232 ~~29-32.~~ Nelson SM, Telfer EE, Anderson RA. The ageing ovary and uterus: new biological  
47  
48  
49 233 insights. Hum Reprod Update 2013 ;19:67-83.  
50  
51 234 ~~30-33.~~ Taddei S, Virdis A, Ghiadoni L, et al. Endothelium, aging, and hypertension. Curr  
52  
53 235 Hypertens Rep 2006;8:84-9.  
54  
55  
56 236  
57  
58  
59 237  
60

1  
2 238 **LEGENDS**

3  
4 239 | Figure 1. Adjusted mean birth weight of neonates in singleton primiparous women in different  
5  
6 240 | maternal age groups. Birth weight adjusted for gestational age, maternal BMI and smoking habits, and  
7  
8  
9 241 | year of delivery. Plots indicate means and bars 95% CI.  
10  
11  
12  
13  
14  
15  
16  
17  
18  
19  
20  
21  
22  
23  
24  
25  
26  
27  
28  
29  
30  
31  
32  
33  
34  
35  
36  
37  
38  
39  
40  
41  
42  
43  
44  
45  
46  
47  
48  
49  
50  
51  
52  
53  
54  
55  
56  
57  
58  
59  
60

For peer review only

1  
2  
3  
4  
5  
6  
7  
8  
9  
10  
11  
12  
13  
14  
15  
16  
17  
18  
19  
20  
21  
22  
23  
24  
25  
26  
27  
28  
29  
30  
31  
32  
33  
34  
35  
36  
37  
38  
39  
40  
41  
42  
43  
44  
45  
46  
47  
48  
49  
50  
51  
52  
53  
54  
55  
56  
57  
58  
59  
60

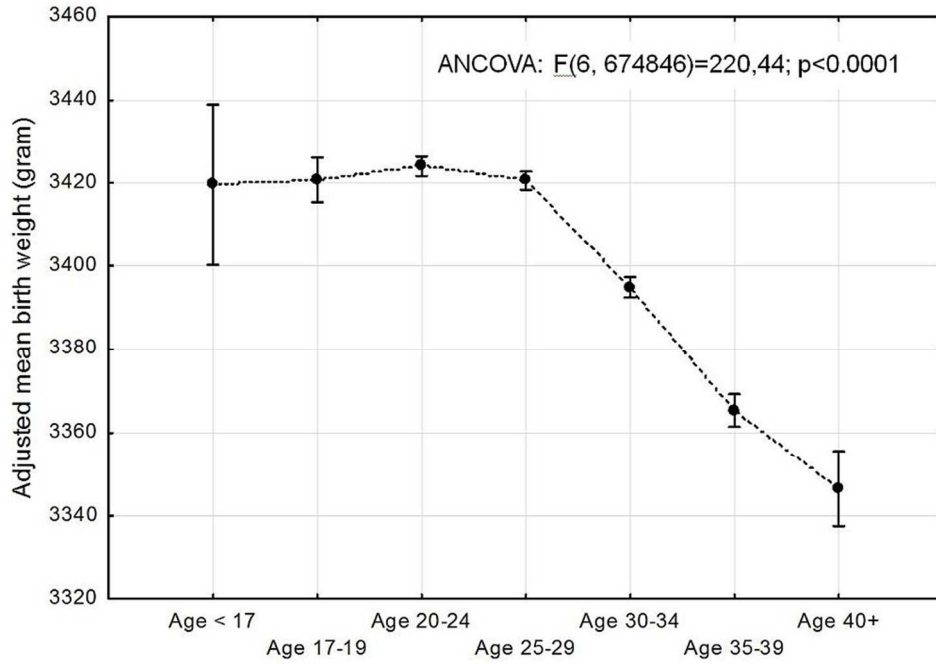

90x66mm (300 x 300 DPI)

ew only

## STROBE Statement—checklist of items that should be included in reports of observational studies

|                              | Item No   | Recommendation                                                                                                                                                                                                                                                                                                                                                                                                                                                                                                                                                                                                                                                                                         |
|------------------------------|-----------|--------------------------------------------------------------------------------------------------------------------------------------------------------------------------------------------------------------------------------------------------------------------------------------------------------------------------------------------------------------------------------------------------------------------------------------------------------------------------------------------------------------------------------------------------------------------------------------------------------------------------------------------------------------------------------------------------------|
| <b>Title and abstract</b>    | <b>1</b>  | (a) Indicate the study's design with a commonly used term in the title or the abstract. Done<br>(b) Provide in the abstract an informative and balanced summary of what was done and what was found Done                                                                                                                                                                                                                                                                                                                                                                                                                                                                                               |
| <b>Introduction</b>          |           |                                                                                                                                                                                                                                                                                                                                                                                                                                                                                                                                                                                                                                                                                                        |
| Background/rationale         | <b>2</b>  | Explain the scientific background and rationale for the investigation being reported. Done                                                                                                                                                                                                                                                                                                                                                                                                                                                                                                                                                                                                             |
| Objectives                   | <b>3</b>  | State specific objectives, including any prespecified hypotheses. Done                                                                                                                                                                                                                                                                                                                                                                                                                                                                                                                                                                                                                                 |
| <b>Methods</b>               |           |                                                                                                                                                                                                                                                                                                                                                                                                                                                                                                                                                                                                                                                                                                        |
| Study design                 | <b>4</b>  | Present key elements of study design early in the paper. Done                                                                                                                                                                                                                                                                                                                                                                                                                                                                                                                                                                                                                                          |
| Setting                      | <b>5</b>  | Describe the setting, locations, and relevant dates, including periods of recruitment, exposure, follow-up, and data collection. Done                                                                                                                                                                                                                                                                                                                                                                                                                                                                                                                                                                  |
| Participants                 | <b>6</b>  | (a) <i>Cohort study</i> —Give the eligibility criteria, and the sources and methods of selection of participants. Describe methods of follow-up. Done<br><i>Case-control study</i> —Give the eligibility criteria, and the sources and methods of case ascertainment and control selection. Give the rationale for the choice of cases and controls<br><i>Cross-sectional study</i> —Give the eligibility criteria, and the sources and methods of selection of participants<br>(b) <i>Cohort study</i> —For matched studies, give matching criteria and number of exposed and unexposed<br><i>Case-control study</i> —For matched studies, give matching criteria and the number of controls per case |
| Variables                    | <b>7</b>  | Clearly define all outcomes, exposures, predictors, potential confounders, and effect modifiers. Give diagnostic criteria, if applicable. Done                                                                                                                                                                                                                                                                                                                                                                                                                                                                                                                                                         |
| Data sources/<br>measurement | <b>8*</b> | For each variable of interest, give sources of data and details of methods of assessment (measurement). Describe comparability of assessment methods if there is more than one group. Done                                                                                                                                                                                                                                                                                                                                                                                                                                                                                                             |
| Bias                         | <b>9</b>  | Describe any efforts to address potential sources of bias. Done                                                                                                                                                                                                                                                                                                                                                                                                                                                                                                                                                                                                                                        |
| Study size                   | <b>10</b> | Explain how the study size was arrived at. All primiparous were included.                                                                                                                                                                                                                                                                                                                                                                                                                                                                                                                                                                                                                              |
| Quantitative variables       | <b>11</b> | Explain how quantitative variables were handled in the analyses. If applicable, describe which groupings were chosen and why. Done                                                                                                                                                                                                                                                                                                                                                                                                                                                                                                                                                                     |
| Statistical methods          | <b>12</b> | (a) Describe all statistical methods, including those used to control for confounding. Done<br>(b) Describe any methods used to examine subgroups and interactions<br>(c) Explain how missing data were addressed. Done<br>(d) <i>Cohort study</i> —If applicable, explain how loss to follow-up was addressed. Done<br><i>Case-control study</i> —If applicable, explain how matching of cases and controls was addressed<br><i>Cross-sectional study</i> —If applicable, describe analytical methods taking account of sampling strategy<br>(e) Describe any sensitivity analyses                                                                                                                    |

Continued on next page

**Results**

|                  |     |                                                                                                                                                                                                                                                                                                                                                                                                                                                               |
|------------------|-----|---------------------------------------------------------------------------------------------------------------------------------------------------------------------------------------------------------------------------------------------------------------------------------------------------------------------------------------------------------------------------------------------------------------------------------------------------------------|
| Participants     | 13* | (a) Report numbers of individuals at each stage of study—eg numbers potentially eligible, examined for eligibility, confirmed eligible, included in the study, completing follow-up, and analysed. Done<br>(b) Give reasons for non-participation at each stage<br>(c) Consider use of a flow diagram                                                                                                                                                         |
| Descriptive data | 14* | (a) Give characteristics of study participants (eg demographic, clinical, social) and information on exposures and potential confounders. Tables.<br>(b) Indicate number of participants with missing data for each variable of interest<br>(c) <i>Cohort study</i> —Summarise follow-up time (eg, average and total amount). Done                                                                                                                            |
| Outcome data     | 15* | <i>Cohort study</i> —Report numbers of outcome events or summary measures over time. Done<br><i>Case-control study</i> —Report numbers in each exposure category, or summary measures of exposure<br><i>Cross-sectional study</i> —Report numbers of outcome events or summary measures                                                                                                                                                                       |
| Main results     | 16  | (a) Give unadjusted estimates and, if applicable, confounder-adjusted estimates and their precision (eg, 95% confidence interval). Make clear which confounders were adjusted for and why they were included. Done only Adjusted Ors are given.<br>(b) Report category boundaries when continuous variables were categorized. Done<br>(c) If relevant, consider translating estimates of relative risk into absolute risk for a meaningful time period. Done. |
| Other analyses   | 17  | Report other analyses done—eg analyses of subgroups and interactions, and sensitivity analyses                                                                                                                                                                                                                                                                                                                                                                |

**Discussion**

|                  |    |                                                                                                                                                                                  |
|------------------|----|----------------------------------------------------------------------------------------------------------------------------------------------------------------------------------|
| Key results      | 18 | Summarise key results with reference to study objectives. Done                                                                                                                   |
| Limitations      | 19 | Discuss limitations of the study, taking into account sources of potential bias or imprecision. Discuss both direction and magnitude of any potential bias. done                 |
| Interpretation   | 20 | Give a cautious overall interpretation of results considering objectives, limitations, multiplicity of analyses, results from similar studies, and other relevant evidence. Done |
| Generalisability | 21 | Discuss the generalisability (external validity) of the study results. Done                                                                                                      |

**Other information**

|         |    |                                                                                                                                                                     |
|---------|----|---------------------------------------------------------------------------------------------------------------------------------------------------------------------|
| Funding | 22 | Give the source of funding and the role of the funders for the present study and, if applicable, for the original study on which the present article is based. Done |
|---------|----|---------------------------------------------------------------------------------------------------------------------------------------------------------------------|

\*Give information separately for cases and controls in case-control studies and, if applicable, for exposed and unexposed groups in cohort and cross-sectional studies.

**Note:** An Explanation and Elaboration article discusses each checklist item and gives methodological background and published examples of transparent reporting. The STROBE checklist is best used in conjunction with this article (freely available on the Web sites of PLoS Medicine at <http://www.plosmedicine.org/>, Annals of Internal Medicine at <http://www.annals.org/>, and Epidemiology at <http://www.epidem.com/>). Information on the STROBE Initiative is available at [www.strobe-statement.org](http://www.strobe-statement.org).



# BMJ Open

## Impact of maternal age on obstetric and neonatal outcome with emphasis on primiparous adolescents and older women-a Swedish Medical Birth Register Study.

|                                 |                                                                                                                                                                                                                                                                                                                                                  |
|---------------------------------|--------------------------------------------------------------------------------------------------------------------------------------------------------------------------------------------------------------------------------------------------------------------------------------------------------------------------------------------------|
| Journal:                        | <i>BMJ Open</i>                                                                                                                                                                                                                                                                                                                                  |
| Manuscript ID:                  | bmjopen-2014-005840.R3                                                                                                                                                                                                                                                                                                                           |
| Article Type:                   | Research                                                                                                                                                                                                                                                                                                                                         |
| Date Submitted by the Author:   | 17-Sep-2014                                                                                                                                                                                                                                                                                                                                      |
| Complete List of Authors:       | Blomberg, Marie; Department of Obstetrics and Gynaecology, Department of Clinical and Experimental Medicine<br>Birch Tyrberg, Rasmus; Department of Obstetrics and Gynaecology, Department of Clinical and Experimental Medicine<br>Kjølhede, Preben; Department of Obstetrics and Gynaecology, Department of Clinical and Experimental Medicine |
| <b>Primary Subject Heading</b>: | Obstetrics and gynaecology                                                                                                                                                                                                                                                                                                                       |
| Secondary Subject Heading:      | Epidemiology                                                                                                                                                                                                                                                                                                                                     |
| Keywords:                       | maternal age, obstetric outcome, neonatal outcome                                                                                                                                                                                                                                                                                                |
|                                 |                                                                                                                                                                                                                                                                                                                                                  |

SCHOLARONE™  
Manuscripts

1  
2 1  
3  
4 2 **Impact of maternal age on obstetric and neonatal outcome with**  
5  
6  
7 3 **emphasis on primiparous adolescents and older women-a Swedish**  
8  
9  
10 4 **Medical Birth Register Study.**  
11  
12  
13  
14 5

15  
16 6 Marie Blomberg MD, PhD, Rasmus Birch Tyrberg, BMs, and Preben Kjølhede, MD, PhD  
17  
18 7 Department of Obstetrics and Gynaecology and Department of Clinical and Experimental Medicine,  
19  
20  
21 8 Linköping University, Linköping, Sweden  
22  
23  
24 9

25  
26 10 Corresponding author:

27  
28 11 Marie Blomberg, MD, PhD

29  
30 12 Department of Obstetrics and Gynaecology,

31  
32 13 University Hospital

33  
34  
35 14 581 85 Linköping

36  
37 15 Sweden

38  
39 16 Phone +46 10 103 00 00

40  
41  
42 17 E-mail: marie.blomberg@lio.se  
43  
44

45 18 **Keywords:** maternal age, mode of delivery, neonatal outcome, obstetric outcome, adolescents

46  
47 19 **Word count:** 3598 words  
48  
49  
50 20  
51  
52  
53 21  
54  
55 22  
56  
57  
58 23  
59  
60

## Abstract

**Objectives:** To evaluate the associations between maternal age and obstetric and neonatal outcomes in primiparous women with emphasis on teenagers and older women.

**Design:** A population-based cohort study.

**Setting:** The Swedish Medical Birth Register.

**Participants:** Primiparous women with singleton births from 1992 through 2010 (N=798,674) were divided into seven age groups: <17 years, 17-19 years, and additional five five-year classes. The reference group consisted of the women age 25-29 years.

**Primary outcome:** Obstetric and neonatal outcome.

**Results:** The teenager groups had significantly more vaginal births (aOR 2.04 (1.79-2.32) and 1.95 (1.88-2.02) for age <17 years and 17-19 years, respectively); fewer caesarean sections (aOR 0.57 (0.48-0.67) and 0.55 (0.53-0.58)), and instrumental vaginal births (aOR 0.43 (0.36-0.52) and 0.50 (0.48-0.53)) compared with the reference group. The opposite was found among older women reaching a 4-fold increased odds ratio for caesarean section. The teenagers showed no increased risk of adverse neonatal outcome but presented an increased risk of prematurity <32 weeks (aOR 1.66 (1.10-2.51) and 1.20 (1.04-1.38)). Women with advancing age ( $\geq 30$  years) revealed significantly increased risk of prematurity, perineal lacerations, preeclampsia, abruption, placenta previa, postpartum haemorrhage and unfavourable neonatal outcomes compared with the reference group.

**Conclusions:** For clinicians counselling young women it is of importance to highlight the obstetrically positive consequences that fewer maternal complications and favourable neonatal outcomes are expected. The results imply that there is a need for individualizing the antenatal surveillance programs and obstetric care based on age grouping in order to attempt to improve the outcomes in the age groups with less favourable obstetric and neonatal outcomes. Such changes in surveillance programs and obstetric interventions need to be evaluated in further studies.

1 49 **Article summary**

2  
3  
4 50 **Impact of maternal age on obstetric and neonatal outcome with emphasis on primiparous**  
5  
6 51 **adolescents and older women-a Swedish Medical Birth Register Study.**

7  
8  
9 52 Strengths and limitations of this study:

- 10  
11 53 • A strength of the present study is that it includes primiparous women of an entire country where  
12  
13 the antenatal care program is equally available to all pregnant women and is comprehensive.  
14 54  
15  
16 55 • Another advantage is the large number of individuals available for evaluation, which makes it  
17  
18 possible to divide the study population into subgroups with sufficient numbers in each stratum  
19 56  
20  
21 57 to provide high statistical power.  
22  
23 58 • A limitation is that the external validity is reduced to facilities with similar socio-economic and  
24  
25 demographic characteristics and health care systems with comparable standards.  
26 59  
27  
28 60 • The Swedish medical birth register contain a large body of information concerning the mother  
29  
30 and the child but only the available data in the register could be used for outcome evaluation  
31 61  
32  
33 62 and adjustments for putative confounders.  
34

35 63  
36  
37  
38  
39  
40  
41  
42  
43  
44  
45  
46  
47  
48  
49  
50  
51  
52  
53  
54  
55  
56  
57  
58  
59  
60

## 64 INTRODUCTION

65 There are a large number of studies evaluating obstetric and neonatal outcome over the full range of  
66 reproductive maternal ages, but especially with a focus on the youngest and the oldest mothers. Young  
67 mothers have been shown to be exposed to an increased risk of anaemia, low birth weight, foetal death,  
68 eclampsia and preterm birth although they at the same time were more likely to have a spontaneous  
69 normal vaginal birth and the risk of preeclampsia and post-partum haemorrhage were significantly  
70 decreased.[1-6] These studies evaluated outcomes in low-income countries. Many studies performed in  
71 low-income countries presented in recent years on the topic of teenage pregnancies have found similar  
72 obstetric and neonatal outcomes.[7-11]

73 Complications during pregnancy and birth at advanced maternal age (either defined as 35 years and  
74 older or 40 years or older) have also been evaluated in high-income countries. Advanced maternal age  
75 at birth has been found to be associated with gestational diabetes, preeclampsia, placenta previa,  
76 caesarean section (CS), placental abruption, preterm delivery, low birth weight, intrauterine foetal  
77 death and an increased perinatal mortality.[12-20] The difference in obstetric and neonatal outcomes  
78 between teenagers and women at advanced age seemed to be lower risks for several unwanted and  
79 threatening outcomes in the teenage group; thus there were no obvious advantages concerning obstetric  
80 and neonatal outcomes at advanced maternal ages. The earlier published studies concerning the impact  
81 of maternal age on perinatal outcome differ in many aspects methodologically as well as in the socio-  
82 demographic characteristics of the populations and health care systems. All these factors make  
83 interpretation of comparisons between data sets difficult.

84 Sweden has during several decades actively developed strategies in social care, education and health  
85 care in order to improve antenatal care and parenthood. In a Swedish state-of-the-art conference held in  
86 1990, the scientific basis of the routine antenatal program was critically evaluated. It was concluded  
87 that the scientific evidence to support the timing and contents of routine visits was unsatisfactory.[21]  
88 Consequently there is a constant need for evaluation both of single diagnostic procedures and

1 89 intervention and of outcomes. An analysis of perinatal outcomes in relation to maternal age in the  
2  
3  
4 90 Swedish population will provide important knowledge that may be used to further improve social,  
5  
6 91 antenatal, obstetric and neonatal care and reveals risk groups that in particular may need more attention  
7  
8 92 in the antenatal care.

10 93 The objective of the present study was to assess the impact of maternal age on obstetric and neonatal  
11  
12  
13 94 outcomes among singleton primiparous women in Sweden, with special emphasis on the adolescents  
14  
15 95 and older mothers.  
16  
17  
18 96

For peer review only

## 97 MATERIALS AND METHODS

98 This study analyses the obstetric and neonatal outcomes of all singleton primiparous women  
99 prospectively registered in the Swedish Medical Birth Register (MBR) who gave births from January 1,  
100 1992 through December 31, 2010. MBR has collected information about births in Sweden since 1973.  
101 It is compulsory for every health care provider to report to the MBR. Medical and other data on almost  
102 all (99%) births in Sweden are listed in the register, which also includes stillbirths. Starting with the  
103 first antenatal visit, usually in gestational week 10-12, the information is collected prospectively in  
104 standardized medical record forms completed at the maternity health care centers at antenatal care  
105 visits, in the birth units, and at the paediatric examination of the newborn. The standardized medical  
106 records are identical throughout the country. A description and validation of the register content is  
107 available.[22-24]

108 The study population was grouped according to maternal age into seven subgroups: <17 years; 17-19  
109 years; 20-24 years, 25-29 years, 30-34 years; 35-39 years and 40+ years. In the outcome analyses we  
110 selected the group of women age 25-29 years as reference group.

111 The list of available variables in MBR has been extended throughout the years that the register has  
112 been active. The obstetric and neonatal outcome data for the purpose of this study are those that have  
113 been available since 1992. From 1992 until June 2008 the MBR includes stillbirths after 28 weeks of  
114 gestation and from July 2008 until 2010 all stillbirths after 22 weeks of gestation are included. Each  
115 outcome studied was either marked in the MBR or registered according to the International Statistical  
116 Classification of Diseases and Related Health Problems (ICD). The obstetric outcome variables studied  
117 were gestational age, mode of delivery; normal vaginal birth (defined as neither instrumental vaginal  
118 delivery, nor CS), CS, instrumental vaginal delivery divided into forceps and vacuum extraction, mode  
119 of onset of labour, perineal laceration, preeclampsia, abruptio placentae, placenta previa, use of  
120 epidural analgesia and postpartum haemorrhage (PPH) exceeding 1000 ml. The foetal and neonatal  
121 outcomes evaluated were Apgar-score at 5 minutes, foetal distress (ICD code P20.0, P20.1 and P20.9),  
122

1 122 aspiration of meconium (ICD code P24.0), shoulder dystocia (ICD code O66.0), and stillbirth. Small-  
2  
3  
4 123 for-gestational age (SGA) newborns were defined as those with birth weight more than 2 standard  
5  
6 124 deviations (SD) below the mean birth weight for gestational age (sex and parity specific) according to a  
7  
8 125 Swedish reference curve.[25] Large-for-gestational age (LGA) newborns were those with a birth  
9  
10  
11 126 weight above 2 SD. All descriptive and background data were extracted from the MBR. The register  
12  
13 127 information on these variables was obtained from the antenatal care center records.  
14  
15  
16 128 The study was approved by the Regional Ethical Review Board in Linköping, Sweden (Dnr 2011/479-  
17  
18 129 31. Approved January 25; 2012).

### 21 130 **Statistical analysis**

22  
23 131 Data are presented as counts and per cent or mean and one SD. Logistic regression analyses were used  
24  
25 132 for comparison of groups for categorical data. Data on a continuous scale were compared using  
26  
27  
28 133 analysis of covariance (ANCOVA). Multivariate logistic regression models were used in order to adjust  
29  
30 134 comparisons for the confounding factors. Consequently crude and adjusted odds ratios (OR and aOR)  
31  
32 135 and 95% confidence intervals (CIs) are reported. Maternal weight and height (used for calculation of  
33  
34  
35 136 maternal Body Mass Index (BMI)) and smoking habits in early pregnancy (unknown, no smoking,  
36  
37 137 smoking) and year of birth were included as confounders in the adjusted analyses. The simultaneous  
38  
39  
40 138 model of including independent variables in the multivariate logistic regression was used since we  
41  
42 139 found it most appropriate for the relevance of the research goal of the study. Such a research strategy is  
43  
44 140 appropriate when there is no logical or theoretical basis for considering any variable to be prior to any  
45  
46  
47 141 other, either in terms of a hypothetical causal structure of the data or in terms of its relevance to the  
48  
49 142 research goals of focusing on prediction and explanation.

50  
51  
52 143 The rationale for including year of birth as an independent variable was that there was variability in the  
53  
54 144 occurrence of obstetric and neonatal diagnoses during the observation period. This may be due to true  
55  
56 145 changes but may also be a result of changes in recording with expanding use of computerized medical  
57  
58  
59 146 records. Maternal BMI and smoking was included as covariates in the adjusted analyses based on their  
60



1 147 well-known associations with maternal and foetal outcome and their unequal distribution over the  
2  
3  
4 148 maternal age strata.[26,27] BMI was included as a continuous variable as the distribution of maternal  
5  
6 149 BMI was almost uniform over the maternal age strata and the association between BMI and maternal  
7  
8  
9 150 age was almost linear (presented as means and standard deviations in Table 1). For the purpose of this  
10  
11 151 study gestational age was added to the confounders in the analyses of CS, preeclampsia and birth  
12  
13 152 weight based on their clinically well-known associations.[25,28,29] The OR for instrumental vaginal  
14  
15 153 delivery was calculated among women with vaginal births only in order to exclude women with an  
16  
17  
18 154 instrumental attempt to deliver followed by an emergency CS. The ORs of perineal lacerations were  
19  
20 155 also estimated among women with vaginal births only. The information concerning use of epidural  
21  
22 156 analgesia was also restricted to vaginal births only. Epidural is an analgesic method that has been  
23  
24  
25 157 widely used in the delivery wards for vaginal births during the entire time period. In contrast the use of  
26  
27 158 epidural analgesia in CS has varied substantially over the time period and has almost exclusively been  
28  
29  
30 159 used in elective CS. Our purpose was to evaluate the odds ratio for epidural use over the maternal age  
31  
32 160 strata and consequently we selected the mode of delivery that exhibited the least variation in the use of  
33  
34 161 the analgesic method over the time period, i.e. vaginal births.

35  
36  
37 162 The software STATISTICA 64 version 10 (StatSoft Inc. 2300 East 14<sup>th</sup> St. Tulsa, OK 74104 USA) was  
38  
39 163 used to carry out the statistical analyses.  
40  
41  
42 164

**RESULTS**

In the period 1992 – 2010, 798,732 women were registered in the MBR as giving birth to their first child. The annual number of primiparous women giving birth varied between 34060 and 49417. Information on maternal age was missing in 58 cases leaving 798,674 women for the analyses. The average age of primiparous women increased substantially from 26.2 years in 1992 to 28.5 in 2004; hereafter it has stayed almost constant at that level. The demographic, obstetric and neonatal data subdivided into maternal age groups are presented in Table 1 and 2.

Table 1. Descriptive data of primiparous women with singleton births in the period 1992-2010.

| Characteristics               | < 17 years<br>(n=2392) |       | 17-19 years<br>(n=29816) |       | 20-24 years<br>(n=185942) |       | 25-29 years<br>(n=300822) |       | 30-34 years<br>(n=205905) |       | 35-39 years<br>(n=63163) |       | 40+ years<br>(n=10634) |       |
|-------------------------------|------------------------|-------|--------------------------|-------|---------------------------|-------|---------------------------|-------|---------------------------|-------|--------------------------|-------|------------------------|-------|
| <i>BMI (kg/m<sup>2</sup>)</i> | 22.8                   | 3.7   | 23.2                     | 4.1   | 23.8                      | 4.3   | 23.7                      | 4.0   | 23.8                      | 4.0   | 24.4                     | 4.1   | 24.7                   | 4.3   |
| <i>BMI<sup>†</sup> class</i>  |                        |       |                          |       |                           |       |                           |       |                           |       |                          |       |                        |       |
| <18.5 kg/m <sup>2</sup>       | 135                    | 5.6%  | 1815                     | 6.1%  | 7650                      | 4.1%  | 7509                      | 2.5%  | 3847                      | 1.9%  | 918                      | 1.5%  | 133                    | 1.3%  |
| 18.5-24.9 kg/m <sup>2</sup>   | 1352                   | 56.5% | 16823                    | 56.4% | 104600                    | 56.3% | 180163                    | 59.9% | 122571                    | 59.5% | 34439                    | 54.5% | 5381                   | 50.1% |
| 25.0-29.9 kg/m <sup>2</sup>   | 315                    | 13.2% | 4687                     | 15.7% | 33961                     | 18.3% | 53896                     | 17.9% | 37234                     | 18.1% | 13310                    | 21.1% | 2442                   | 23.0% |
| 30.0-34.9 kg/m <sup>2</sup>   | 81                     | 3.4%  | 1327                     | 4.5%  | 10550                     | 5.7%  | 14401                     | 4.8%  | 9389                      | 4.6%  | 3575                     | 5.7%  | 683                    | 6.4%  |
| 35.0-39.9 kg/m <sup>2</sup>   | 11                     | 0.5%  | 337                      | 1.1%  | 3013                      | 1.6%  | 4070                      | 1.4%  | 2724                      | 1.3%  | 1024                     | 1.6%  | 188                    | 1.8%  |
| ≥ 40.0 kg/m <sup>2</sup>      | 4                      | 0.2%  | 87                       | 0.3%  | 904                       | 0.5%  | 1312                      | 0.4%  | 944                       | 0.5%  | 342                      | 0.5%  | 68                     | 0.6%  |
| Missing data                  | 494                    | 20.7% | 4740                     | 15.9% | 25264                     | 13.6% | 39471                     | 13.1% | 29196                     | 14.2% | 9555                     | 15.1% | 1739                   | 16.4% |
| <i>Smoking<sup>†</sup></i>    |                        |       |                          |       |                           |       |                           |       |                           |       |                          |       |                        |       |
| Yes                           | 666                    | 27.8% | 9012                     | 30.2% | 31675                     | 17.0% | 24676                     | 8.2%  | 13971                     | 6.8%  | 5287                     | 8.4%  | 958                    | 9.0%  |
| No                            | 1542                   | 64.5% | 19154                    | 64.3% | 145695                    | 78.4% | 261348                    | 86.9% | 178792                    | 86.8% | 53416                    | 84.6% | 8883                   | 83.5% |
| Missing data                  | 184                    | 7.7%  | 1650                     | 5.5%  | 8572                      | 4.6%  | 14798                     | 4.9%  | 13142                     | 6.4%  | 4460                     | 7.0%  | 793                    | 7.5%  |
| <i>Gestational age</i>        |                        |       |                          |       |                           |       |                           |       |                           |       |                          |       |                        |       |
| Information available         | 2368                   | 99.0% | 29715                    | 99.7% | 185700                    | 99.9% | 300603                    | 99.9% | 205719                    | 99.9% | 63098                    | 99.9% | 10620                  | 99.9% |
| Missing data                  | 24                     | 1.0%  | 101                      | 0.3%  | 242                       | 0.1%  | 219                       | 0.1%  | 186                       | 0.1%  | 65                       | 0.1%  | 14                     | 0.1%  |

Figures denote mean and standard deviation or counts and proportions.

BMI = body mass index.

<sup>†</sup> Reported height, weight and smoking habits at first antenatal visit.

Table 2. Obstetric and neonatal outcome characteristics of primiparous women with singleton births in the period 1992-2010.

| Characteristics                                              | Age groups             |       |                          |       |                           |       |                           |       |                           |       |                          |       |                        |       |
|--------------------------------------------------------------|------------------------|-------|--------------------------|-------|---------------------------|-------|---------------------------|-------|---------------------------|-------|--------------------------|-------|------------------------|-------|
|                                                              | < 17 years<br>(n=2392) |       | 17-19 years<br>(n=29816) |       | 20-24 years<br>(n=185942) |       | 25-29 years<br>(n=300822) |       | 30-34 years<br>(n=205905) |       | 35-39 years<br>(n=63163) |       | 40+ years<br>(n=10634) |       |
| <i>Labour:</i>                                               |                        |       |                          |       |                           |       |                           |       |                           |       |                          |       |                        |       |
| Spontaneous onset labour                                     | 2055                   | 85.9% | 25853                    | 86.7% | 158879                    | 85.4% | 251340                    | 83.6% | 163876                    | 79.6% | 45330                    | 71.2% | 6261                   | 58.9% |
| Induced labour                                               | 184                    | 7.7%  | 2528                     | 8.5%  | 17433                     | 9.4%  | 30873                     | 10.3% | 25474                     | 12.4% | 10065                    | 15.9% | 2111                   | 19.9% |
| <i>Mode of delivery:</i>                                     |                        |       |                          |       |                           |       |                           |       |                           |       |                          |       |                        |       |
| Normal vaginal birth                                         | 2030                   | 84.9% | 25096                    | 84.2% | 147082                    | 79.1% | 219993                    | 73.1% | 135099                    | 65.6% | 35112                    | 55.6% | 4724                   | 44.4% |
| Forceps                                                      | 7                      | 0.3%  | 126                      | 0.4%  | 1143                      | 0.6%  | 2166                      | 0.7%  | 1515                      | 0.7%  | 575                      | 0.9%  | 84                     | 0.8%  |
| Vacuum extraction                                            | 143                    | 6.0%  | 2090                     | 7.0%  | 18011                     | 9.7%  | 36696                     | 12.2% | 29811                     | 14.5% | 10119                    | 16.0% | 1599                   | 15.0% |
| CS <sup>‡</sup>                                              | 213                    | 8.9%  | 2500                     | 8.4%  | 19747                     | 10.6% | 42044                     | 14.0% | 39534                     | 19.2% | 17355                    | 27.5% | 4226                   | 39.7% |
| CS elective 1999-2010 †                                      | 53                     | 2.2%  | 373                      | 1.3%  | 2828                      | 1.5%  | 6973                      | 2.3%  | 7656                      | 3.7%  | 3853                     | 6.1%  | 1132                   | 10.6% |
| CS acute 1999-2010 †                                         | 73                     | 3.1%  | 882                      | 3.0%  | 7092                      | 3.8%  | 16651                     | 5.5%  | 17953                     | 8.7%  | 7826                     | 12.4% | 1798                   | 16.9% |
| <i>Gestational age:</i>                                      |                        |       |                          |       |                           |       |                           |       |                           |       |                          |       |                        |       |
| GA < 28 weeks                                                | 20                     | 0.8%  | 107                      | 0.4%  | 464                       | 0.2%  | 743                       | 0.2%  | 640                       | 0.3%  | 292                      | 0.5%  | 73                     | 0.7%  |
| GA < 32 weeks                                                | 40                     | 1.7%  | 308                      | 1.0%  | 1436                      | 0.8%  | 2415                      | 0.8%  | 2048                      | 1.0%  | 900                      | 1.4%  | 206                    | 1.9%  |
| GA < 37 weeks                                                | 213                    | 8.9%  | 1937                     | 6.5%  | 11030                     | 5.9%  | 18005                     | 5.6%  | 12727                     | 6.2%  | 4586                     | 7.3%  | 877                    | 8.2%  |
| GA 37 – 41 weeks                                             | 1990                   | 83.2% | 25811                    | 86.6% | 161043                    | 86.6% | 257320                    | 85.5% | 172621                    | 83.8% | 51494                    | 81.5% | 8786                   | 82.6% |
| GA ≥ 42 weeks                                                | 165                    | 6.9%  | 1967                     | 6.6%  | 13627                     | 7.3%  | 25278                     | 8.4%  | 20371                     | 9.9%  | 7018                     | 11.1% | 957                    | 9.0%  |
| <i>Maternal complications and use of epidural analgesia:</i> |                        |       |                          |       |                           |       |                           |       |                           |       |                          |       |                        |       |
| Perineal laceration gr 1-2*                                  | 311                    | 14.3% | 3982                     | 14.6% | 32602                     | 19.6% | 70452                     | 27.3% | 55163                     | 33.2% | 15477                    | 33.9% | 2116                   | 33.1% |
| Perineal laceration gr 3-4*                                  | 23                     | 1.1%  | 272                      | 1.0%  | 3030                      | 1.8%  | 8202                      | 3.2%  | 6846                      | 4.1%  | 1856                     | 4.1%  | 222                    | 3.5%  |
| Preeclampsia                                                 | 43                     | 1.8%  | 576                      | 1.9%  | 4317                      | 2.3%  | 6520                      | 2.2%  | 4265                      | 2.1%  | 1610                     | 2.5%  | 365                    | 3.4%  |
| Abruptio placentae                                           | 16                     | 0.7%  | 135                      | 0.5%  | 643                       | 0.3%  | 1171                      | 0.4%  | 955                       | 0.5%  | 390                      | 0.6%  | 87                     | 0.8%  |
| Placenta previa                                              | 2                      | 0.1%  | 16                       | 0.1%  | 159                       | 0.1%  | 505                       | 0.2%  | 612                       | 0.3%  | 375                      | 0.6%  | 89                     | 0.8%  |
| PPH > 1000 ml (VB)                                           | 65                     | 3.0%  | 667                      | 2.4%  | 5078                      | 3.1%  | 10931                     | 4.2%  | 9720                      | 5.9%  | 3173                     | 6.9%  | 485                    | 7.6%  |
| PPH > 1000 ml (CS)                                           | 2                      | 0.9%  | 28                       | 1.1%  | 252                       | 1.3%  | 541                       | 1.3%  | 578                       | 1.5%  | 237                      | 1.4%  | 80                     | 1.9%  |
| Epidural analgesia*                                          | 903                    | 41.4% | 11569                    | 42.4% | 68332                     | 41.1% | 105266                    | 40.7% | 70691                     | 42.5% | 20151                    | 44.0% | 2743                   | 42.9% |

Table 2 continued. Obstetric and neonatal outcome characteristics of primiparous women with singleton births in the period 1992-2010.

| Characteristics        | Age groups             |      |                          |      |                           |      |                           |      |                           |      |                          |      |                        |      |
|------------------------|------------------------|------|--------------------------|------|---------------------------|------|---------------------------|------|---------------------------|------|--------------------------|------|------------------------|------|
|                        | < 17 years<br>(n=2392) |      | 17-19 years<br>(n=29816) |      | 20-24 years<br>(n=185942) |      | 25-29 years<br>(n=300822) |      | 30-34 years<br>(n=205905) |      | 35-39 years<br>(n=63163) |      | 40+ years<br>(n=10634) |      |
| <i>Neonatal</i>        |                        |      |                          |      |                           |      |                           |      |                           |      |                          |      |                        |      |
| Foetal distress        | 8                      | 0.3% | 122                      | 0.4% | 932                       | 0.5% | 1621                      | 0.5% | 1070                      | 0.5% | 388                      | 0.6% | 56                     | 0.5% |
| Aspiration of meconium | 0                      | 0%   | 30                       | 0.1% | 363                       | 0.2% | 649                       | 0.2% | 563                       | 0.3% | 193                      | 0.3% | 42                     | 0.4% |
| Shoulder dystocia      | 6                      | 0.3% | 78                       | 0.3% | 793                       | 0.4% | 1580                      | 0.5% | 1382                      | 0.7% | 489                      | 0.8% | 79                     | 0.7% |
| Stillbirth             | 7                      | 0.3% | 102                      | 0.3% | 571                       | 0.3% | 893                       | 0.3% | 768                       | 0.4% | 347                      | 0.5% | 87                     | 0.8% |
| SGA                    | 91                     | 3.8% | 1136                     | 3.8% | 6016                      | 3.2% | 8831                      | 2.9% | 7216                      | 3.5% | 2962                     | 4.7% | 617                    | 5.8% |
| LGA                    | 47                     | 2.0% | 539                      | 1.8% | 3838                      | 2.1% | 5943                      | 2.0% | 3846                      | 1.9% | 1279                     | 2.0% | 224                    | 2.1% |
| Apgar score < 7 at 5   | 43                     | 1.8% | 381                      | 1.3% | 2409                      | 1.3% | 4158                      | 1.4% | 3354                      | 1.6% | 1274                     | 2.0% | 240                    | 2.3% |
| Birth weight (gram)    | 3348                   | 592  | 3403                     | 565  | 3453                      | 554  | 3470                      | 555  | 3452                      | 572  | 3415                     | 612  | 3360                   | 640  |

Figures denote counts and proportions or mean and one standard deviation.

BMI = body mass index; CS = caesarean section; GA = gestational age at birth; LGA = large for gestational age; PPH = postpartum haemorrhage; SGA = small for gestational age; VB = vaginal birth

‡All CS independent of status of performance – acute or elective. †Caesarean section was subdivided into elective and acute CS from 1999.

\*Epidural analgesia and perineal lacerations in vaginal births only.

1  
2  
3  
4  
5  
6  
7  
8  
9  
10  
11  
12  
13  
14  
15  
16  
17  
18  
19  
20  
21  
22  
23  
24  
25  
26  
27  
28  
29  
30  
31  
32  
33  
34  
35  
36  
37  
38  
39  
40  
41  
42  
43  
44  
45  
46  
47  
48  
49  
50  
51  
52  
53  
54  
55  
56  
57  
58  
59  
60

The crude odds rates and the results of the multivariate analyses models of obstetric and neonatal outcomes are shown in Table 3 and 4, respectively.

For peer review only

Table 3. Obstetric outcome data in singleton primiparous women in the period 1992-2010 in relation to maternal age group.

| Characteristics                | Crude OR (95%CI) | aOR (95%CI) <sup>†</sup> | Crude OR (95%CI) | aOR (95%CI) <sup>†</sup> | Crude OR (95%CI) | aOR (95%CI) <sup>†</sup> |
|--------------------------------|------------------|--------------------------|------------------|--------------------------|------------------|--------------------------|
| <i>Labour</i>                  |                  |                          |                  |                          |                  |                          |
|                                | < 17 years       |                          | 17-19 years      |                          | 20-24 years      |                          |
| Spontaneous onset labour       | 1.20 (1.07-1.35) | 1.20 (1.05-1.37)         | 1.28 (1.24-1.33) | 1.26 (1.21-1.31)         | 1.16 (1.14-1.17) | 1.16 (1.14-1.18)         |
| Induced labour                 | 0.73 (0.63-0.85) | 0.78 (0.66-0.93)         | 0.81 (0.78-0.85) | 0.86 (0.82-0.90)         | 0.90 (0.89-0.92) | 0.91 (0.90-0.93)         |
|                                | 30 - 34 years    |                          | 35 - 39 years    |                          | 40+ years        |                          |
| Spontaneous onset labour       | 0.77 (0.76-0.78) | 0.78 (0.77-0.79)         | 0.50 (0.49-0.51) | 0.52 (0.51-0.54)         | 0.29 (0.26-0.30) | 0.30 (0.28-0.31)         |
| Induced labour                 | 1.23 (1.21-1.26) | 1.19 (1.17-1.21)         | 1.66 (1.62-1.70) | 1.54 (1.50-1.58)         | 2.17 (2.06-2.27) | 1.97 (1.87-2.08)         |
| <i>Mode of delivery</i>        |                  |                          |                  |                          |                  |                          |
|                                | < 17 years       |                          | 17-19 years      |                          | 20-24 years      |                          |
| Normal vaginal birth           | 2.05 (1.84-2.30) | 2.04 (1.79-2.32)         | 1.95 (1.89-2.02) | 1.95 (1.88-2.02)         | 1.39 (1.37-1.41) | 1.39 (1.37-1.41)         |
| Forceps <sup>‡</sup>           | 0.38 (0.18-0.81) | 0.41 (0.18-0.92)         | 0.55 (0.46-0.64) | 0.48 (0.39-0.59)         | 0.82 (0.76-0.88) | 0.77 (0.71-0.84)         |
| Vacuum extraction <sup>‡</sup> | 0.42 (0.36-0.51) | 0.43 (0.36-0.52)         | 0.50 (0.48-0.53) | 0.50 (0.48-0.53)         | 0.74 (0.72-0.75) | 0.74 (0.72-0.75)         |
| CS. all                        | 0.60 (0.52-0.69) | 0.57 (0.48-0.67)         | 0.56 (0.54-0.69) | 0.55 (0.53-0.58)         | 0.73 (0.72-0.74) | 0.72 (0.71-0.74)         |
| CS elective 1999-2010 †        | 0.95 (0.73-1.25) | 0.83 (0.60-1.14)         | 0.53 (0.48-0.59) | 0.53 (0.47-0.60)         | 0.65 (0.62-0.68) | 0.68 (0.65-0.71)         |
| CS acute 1999-2010 †           | 0.54 (0.43-0.68) | 0.53 (0.40-0.69)         | 0.52 (0.49-0.56) | 0.56 (0.52-0.61)         | 0.68 (0.66-0.70) | 0.71 (0.69-0.73)         |
|                                | 30 - 34 years    |                          | 35 - 39 years    |                          | 40+ years        |                          |
| Normal vaginal delivery        | 0.70 (0.69-0.71) | 0.72 (0.71-0.73)         | 0.46 (0.45-0.47) | 0.48 (0.47-0.49)         | 0.29 (0.28-0.31) | 0.31 (0.30-0.32)         |
| Forceps <sup>‡</sup>           | 1.08 (1.01-1.15) | 1.20 (1.12-1.29)         | 1.48 (1.35-1.63) | 1.66 (1.49-1.84)         | 1.58 (1.27-1.98) | 1.75 (1.37-2.24)         |
| Vacuum extraction <sup>‡</sup> | 1.32 (1.30-1.34) | 1.29 (1.27-1.32)         | 1.72 (1.67-1.76) | 1.67 (1.63-1.72)         | 2.01 (1.90-2.13) | 1.92 (1.80-2.04)         |
| CS. all                        | 1.46 (1.44-1.49) | 1.44 (1.42-1.47)         | 2.34 (2.29-2.38) | 2.21 (2.16-2.26)         | 4.07 (3.91-4.23) | 3.78 (3.61-3.96)         |
| CS elective 1999-2010 †        | 1.63 (1.57-1.68) | 1.44 (1.39-1.49)         | 2.74 (2.63-2.85) | 2.25 (2.15-2.35)         | 5.03 (4.70-5.36) | 3.89 (3.61-4.20)         |
| CS acute 1999-2010 †           | 1.63 (1.59-1.67) | 1.44 (1.40-1.47)         | 2.41 (2.35-2.48) | 1.94 (1.88-2.00)         | 3.47 (3.29-3.66) | 2.68 (2.52-2.85)         |
| <i>Gestational age</i>         |                  |                          |                  |                          |                  |                          |
|                                | < 17 years       |                          | 17-19 years      |                          | 20-24 years      |                          |
| GA < 28 weeks                  | 3.44 (2.20-5.37) | 2.84 (1.59-5.06)         | 1.46 (1.19-1.79) | 1.25 (0.97-1.62)         | 1.01 (0.90-1.14) | 0.89 (0.77-1.02)         |
| GA < 32 weeks                  | 2.12 (1.55-2.91) | 1.66 (1.10-2.51)         | 1.29 (1.15-1.46) | 1.20 (1.04-1.38)         | 0.96 (0.90-1.03) | 0.92 (0.85-0.99)         |
| GA < 37 weeks                  | 1.55 (1.34-1.79) | 1.46 (1.24-1.72)         | 1.09 (1.04-1.15) | 1.03 (0.98-1.09)         | 0.99 (0.97-1.02) | 0.97 (0.95-1.00)         |
| GA 37 – 41 weeks               | 0.89 (0.79-0.99) | 0.88 (0.77-0.99)         | 1.11 (1.07-1.15) | 1.14 (1.09-1.18)         | 1.10 (2.08-1.12) | 1.12 (1.10-1.14)         |
| GA ≥ 42 weeks                  | 0.82 (0.70-0.96) | 0.89 (0.75-1.06)         | 0.77 (0.74-0.81) | 0.79 (0.74-0.83)         | 0.86 (0.84-0.88) | 0.85 (0.83-0.87)         |
|                                | 30 - 34 years    |                          | 35 - 39 years    |                          | 40+ years        |                          |
| GA < 28 weeks                  | 1.26 (1.13-1.40) | 1.17 (1.04-1.33)         | 1.88 (1.64-2.15) | 1.61 (1.40-1.90)         | 2.79 (2.19-3.56) | 2.48 (1.86-3.29)         |
| GA < 32 weeks                  | 1.24 (1.17-1.32) | 1.24 (1.16-1.33)         | 1.79 (1.65-1.93) | 1.68 (1.53-1.84)         | 2.44 (2.12-2.82) | 2.25 (1.90-2.66)         |
| GA < 37 weeks                  | 1.04 (1.01-1.06) | 1.02 (0.99-1.05)         | 1.23 (1.19-1.27) | 1.19 (1.15-1.24)         | 1.41 (1.32-1.52) | 1.37 (1.26-1.48)         |
| GA 37 – 41 weeks               | 0.88 (0.86-0.89) | 0.89 (0.86-0.89)         | 0.75 (0.73-0.76) | 0.76 (0.74-0.78)         | 0.81 (0.77-0.85) | 0.83 (0.79-0.88)         |
| GA ≥ 42 weeks                  | 1.20 (1.17-1.22) | 1.20 (1.18-1.23)         | 1.36 (1.33-1.40) | 1.35 (1.31-1.39)         | 1.08 (1.01-1.15) | 1.06 (0.98-1.14)         |

Table 3 continued. Obstetric outcome data in singleton primiparous women in the period 1992-2010 in relation to maternal age group.

| Characteristics                                              | Crude OR (95%CI) | aOR (95%CI) <sup>†</sup> | Crude OR (95%CI) | aOR (95%CI) <sup>†</sup> | Crude OR (95%CI) | aOR (95%CI) <sup>†</sup> |
|--------------------------------------------------------------|------------------|--------------------------|------------------|--------------------------|------------------|--------------------------|
| <i>Maternal complications and use of epidural analgesia:</i> |                  |                          |                  |                          |                  |                          |
|                                                              | < 17 years       |                          | 17-19 years      |                          | 20-24 years      |                          |
| Perineal laceration grade 1-2 <sup>¥</sup>                   | 0.44 (0.39-0.50) | 0.44 (0.38-0.50)         | 0.46 (0.44-0.47) | 0.47 (0.45-0.49)         | 0.65 (0.64-0.66) | 0.68 (0.67-0.69)         |
| Perineal laceration grade 3-4 <sup>¥</sup>                   | 0.33 (0.22-0.49) | 0.39 (0.25-0.60)         | 0.31 (0.25-0.37) | 0.37 (0.32-0.42)         | 0.57 (0.54-0.59) | 0.61 (0.58-0.64)         |
| Preeclampsia                                                 | 0.83 (0.61-1.12) | 0.89 (0.62-1.27)         | 0.89 (0.82-0.97) | 0.93 (0.84-1.02)         | 1.07 (1.03-1.12) | 1.01 (0.96-1.05)         |
| Abruptio placentae                                           | 1.72 (1.05-2.83) | 1.76 (1.03-3.00)         | 1.16 (0.97-1.39) | 1.02 (0.83-1.26)         | 0.89 (0.81-0.98) | 0.83 (0.74-0.92)         |
| Placenta praevia                                             | 0.50 (0.12-2.00) | 0.57 (0.14-2.30)         | 0.32 (0.19-0.53) | 0.28 (0.16-0.50)         | 0.52 (0.43-0.61) | 0.52 (0.43-0.63)         |
| PPH > 1000 ml (VB)                                           | 0.70 (0.54-0.89) | 0.65 (0.48-0.88)         | 0.57 (0.53-0.61) | 0.64 (0.59-0.70)         | 0.71 (0.69-0.74) | 0.78 (0.75-0.81)         |
| PPH > 1000 ml (CS)                                           | 0.73 (0.18-2.93) | 0.52 (0.07-3.74)         | 0.87 (0.59-1.27) | 1.16 (0.77-1.93)         | 0.99 (0.92-1.07) | 1.09 (0.93-1.28)         |
| Epidural analgesia <sup>¥</sup>                              | 1.03 (0.95-1.12) | 1.03 (0.93-1.13)         | 1.07 (1.06-1.08) | 1.07 (1.04-1.10)         | 1.02 (1.01-1.03) | 1.03 (1.01-1.04)         |
|                                                              | 30 - 34 years    |                          | 35 - 39 years    |                          | 40+ years        |                          |
| Perineal laceration grade 1-2 <sup>¥</sup>                   | 1.33 (1.31-1.34) | 1.11 (1.10-1.13)         | 1.37 (1.34-1.40) | 1.08 (1.05-1.10)         | 1.32 (1.25-1.39) | 1.00 (0.94-1.07)         |
| Perineal laceration grade 3-4 <sup>¥</sup>                   | 1.31 (1.27-1.36) | 1.16 (1.12-1.20)         | 1.29 (1.23-1.36) | 1.12 (1.05-1.18)         | 1.10 (0.96-1.26) | 0.88 (0.75-1.02)         |
| Preeclampsia                                                 | 0.95 (0.92-0.99) | 1.07 (1.03-1.12)         | 1.18 (1.12-1.25) | 1.30 (1.22-1.39)         | 1.60 (1.44-1.79) | 1.83 (1.62-2.06)         |
| Abruptio placentae                                           | 1.19 (1.09-1.30) | 1.27 (1.16-1.40)         | 1.59 (1.42-1.78) | 1.71 (1.50-1.94)         | 2.11 (1.70-2.63) | 2.09 (1.62-2.71)         |
| Placenta praevia                                             | 1.77 (1.58-1.99) | 1.74 (1.53-2.00)         | 3.55 (3.11-4.06) | 3.47 (2.99-4.03)         | 5.02 (4.00-6.29) | 5.23 (4.08-6.70)         |
| PPH > 1000 ml (VB)                                           | 1.41 (1.37-1.45) | 1.27 (1.23-1.31)         | 1.69 (1.62-1.76) | 1.47 (1.40-1.53)         | 1.86 (1.69-2.05) | 1.48 (1.26-1.52)         |
| PPH > 1000 ml (CS)                                           | 1.14 (1.01-1.28) | 1.04 (0.91-1.18)         | 1.06 (0.91-1.24) | 0.95 (0.81-1.12)         | 1.48 (1.17-1.88) | 1.35 (1.05-1.73)         |
| Epidural analgesia <sup>¥</sup>                              | 1.08 (1.06-1.09) | 1.03 (1.02-1.05)         | 1.14 (1.12-1.17) | 1.06 (1.04-1.09)         | 1.10 (1.04-1.15) | 0.98 (0.93-1.03)         |

Reference group: Maternal age 25-29 years.

CI = confidence intervals; CS = Caesarean section; GA = gestational age at delivery; N/A = not applicable; aOR = adjusted odds ratio; PPH = postpartum haemorrhage; VD = vaginal birth.

<sup>†</sup> Adjusted for maternal BMI and smoking habits at first antenatal care visit and year of birth. CS and preeclampsia also adjusted for gestational age. <sup>‡</sup> Caesarean section was subdivided into elective and acute CS from 1999. <sup>¥</sup> Forceps, vacuum extraction, epidural analgesia and perineal lacerations among vaginally delivered women.



Table 4. Neonatal outcome data in singleton primiparous women in the period 1992-2010 in relation to maternal age group.

| Characteristics                | Crude OR (95%CI) |                  | aOR (95%CI) <sup>†</sup> |                  | Crude OR (95%CI) |                  | aOR (95%CI) <sup>†</sup> |  |
|--------------------------------|------------------|------------------|--------------------------|------------------|------------------|------------------|--------------------------|--|
|                                | < 17 years       |                  | 17-19 years              |                  | 20-24 years      |                  | 30 - 34 years            |  |
| Foetal distress                | 0.62 (0.31-1.24) | 0.52 (0.22-1.26) | 0.76 (0.63-0.91)         | 0.63 (0.51-0.79) | 0.93 (0.86-1.01) | 0.79 (0.72-0.91) |                          |  |
| Aspiration of meconium         | N/A              | N/A              | 0.47 (0.32-0.67)         | 0.46 (0.31-0.70) | 0.90 (0.80-1.03) | 0.93 (0.81-1.07) |                          |  |
| Shoulder dystocia <sup>‡</sup> | 0.45 (0.11-1.82) | 0.32(0.05-2.29)  | 0.74 (0.58-0.90)         | 0.74 (0.52-1.07) | 1.01 (0.88-1.16) | 1.00 (0.86-1.16) |                          |  |
| Stillbirth                     | 0.99 (0.47-2.08) | 0.58 (0.19-1.80) | 1.15 (0.94-1.42)         | 0.97 (0.75-1.25) | 1.03 (0.93-1.15) | 0.98 (0.87-1.11) |                          |  |
| SGA                            | 1.32 (1.07-1.63) | 1.00 (0.78-1.28) | 1.31 (1.23-1.40)         | 1.01 (0.94-1.09) | 1.11 (1.07-1.14) | 1.00 (0.96-1.04) |                          |  |
| LGA                            | 1.01 (0.75-1.34) | 1.08 (0.76-1.53) | 0.92 (0.84-1.00)         | 1.03 (0.94-1.14) | 1.05 (1.00-1.09) | 1.05 (1.00-1.10) |                          |  |
| Apgar score < 7 at 5 minutes   | 1.31 (0.96-1.77) | 1.30 (0.91-1.86) | 0.92 (0.83-1.03)         | 0.92 (0.81-1.11) | 0.93 (0.89-0.99) | 0.93 (0.88-0.98) |                          |  |
|                                |                  |                  | 35 - 39 years            |                  | 40+ years        |                  |                          |  |
| Foetal distress                | 0.96 (0.89-1.04) | 1.23 (1.13-1.35) | 1.14 (1.02-1.27)         | 1.51 (1.33-1.72) | 0.98 (0.75-1.28) | 1.60 (1.20-2.13) |                          |  |
| Aspiration of meconium         | 1.27 (1.13-1.42) | 1.36 (1.20-1.54) | 1.42 (1.21-1.67)         | 1.48 (1.24-1.77) | 1.83 (1.34-2.51) | 1.82 (1.28-2.58) |                          |  |
| Shoulder dystocia <sup>‡</sup> | 1.18 (1.04-1.35) | 1.13 (0.90-1.41) | 1.13 (0.91-1.39)         | 1.13 (0.91-1.41) | 1.47 (0.93-2.33) | 1.27 (0.76-2.12) |                          |  |
| Stillbirth                     | 1.26 (1.14-1.38) | 1.25 (1.12-1.39) | 1.85 (1.64-2.10)         | 1.72 (1.49-1.99) | 2.77 (2.22-3.46) | 2.34 (1.80-3.03) |                          |  |
| SGA                            | 1.20 (1.16-1.24) | 1.24 (1.20-1.28) | 1.63 (1.56-1.70)         | 1.65 (1.58-1.73) | 2.04 (1.87-2.22) | 2.06 (1.87-2.26) |                          |  |
| LGA                            | 0.94 (0.91-0.98) | 0.94 (0.90-0.98) | 1.03 (0.97-1.09)         | 0.97 (0.91-1.04) | 1.07 (0.93-1.22) | 0.94 (0.81-1.09) |                          |  |
| Apgar score < 7 at 5 minutes   | 1.18 (1.13-1.24) | 1.18 (1.12-1.24) | 1.47 (1.38-1.56)         | 1.39 (1.29-1.49) | 1.65 (1.44-1.88) | 1.51 (1.30-1.75) |                          |  |

Reference group: Maternal age 25-29 years.

CI = confidence interval; LGA = large for gestational age; N/A = not applicable; aOR = adjusted odds ratio; SGA = small for gestational age

<sup>†</sup> Adjusted for maternal BMI and smoking habits at first antenatal care visit and year of birth

<sup>‡</sup> Shoulder dystocia among vaginal delivered women.

1 **Mode of delivery, obstetric and neonatal outcome of adolescents**

2  
3  
4 2 Compared with the reference group the teenagers had a significantly higher likelihood of having  
5  
6 3 spontaneous onset of labour and of having a normal vaginal delivery. Teenagers also demonstrated a  
7  
8 4 significantly higher risk of giving birth prematurely. However, only the group of teenagers younger  
9  
10 5 than 17 years of age had an increased risk of giving birth very prematurely i.e. before 28 weeks of  
11  
12 6 gestational age, and the same group revealed a significantly higher risk of placental abruption. In  
13  
14 7 contrast with these observations the teenagers were delivered instrumentally and by CS significantly  
15  
16 8 less often, and the vaginal births caused significantly fewer perineal lacerations (only evaluated among  
17  
18 9 women who delivered vaginally) and PPH > 1000 ml. Likewise the occurrence of placenta previa was  
19  
20 10 seen less often among teenagers whereas the occurrence of preeclampsia was equal to that seen in the  
21  
22 11 reference group.

23  
24  
25  
26  
27  
28 12 Concerning the foetal and neonatal outcomes for adolescents the newborns were less likely to show  
29  
30 13 foetal distress and meconium aspiration in spite of a similar occurrence of Apgar score < 7 at 5  
31  
32 14 minutes. The newborns of the adolescents were not more prone to being stillborn or being SGA than  
33  
34 15 the newborns of women in the reference group. The adjusted mean birth weight of newborns of  
35  
36 16 adolescents did not differ significantly from that of women up to 29 years of age (Figure 1).

37  
38  
39  
40 17 **Mode of delivery, obstetric and neonatal outcome of women 20-24 years of age**

41  
42 18 The young women, 20 – 24 years of age, differed in some aspects from the reference group as well as  
43  
44 19 from the adolescents. They were less likely to be delivered prematurely and had a lower frequency of  
45  
46 20 placental abruption. Otherwise the obstetric and neonatal outcomes were similarly favourable as those  
47  
48 21 observed for the adolescents in comparison with the reference group.

49  
50  
51  
52 22 **Mode of delivery, obstetric and neonatal outcome of women older than 29 years of age**

53  
54  
55 23 As shown in Table 3 compared with the reference group almost all obstetric outcome variables  
56  
57 24 demonstrated a continuously progressive deterioration with increasing age. The likelihood of normal  
58  
59  
60

1 25 vaginal births decreased; induced labour, instrumental deliveries and CS increased as well as  
2  
3  
4 26 prematurity including very premature deliveries. The risk of perineal laceration increased moderately  
5  
6 27 whereas the risk of PPH > 1000 ml in vaginal births was more pronounced. The likelihood of the  
7  
8 28 pregnancy complications preeclampsia, abruptio placenta and placenta previa was also higher in the  
9  
10 29 older age groups and progressed substantially with increasing age. Similarly, the foetal and neonatal  
11  
12 30 outcome was adversely progressively influenced by increasing maternal age. With increasing maternal  
13  
14 31 age over 30 years significantly more neonates were SGA, showed foetal distress, had Apgar score < 7  
15  
16 32 at 5 minutes or meconium aspiration, or were stillborn. The mean birth weight of the neonates also  
17  
18 33 decreased significantly with increasing maternal age after the age of 30 (Figure 1).  
19  
20  
21  
22  
23 34  
24  
25  
26  
27  
28  
29  
30  
31  
32  
33  
34  
35  
36  
37  
38  
39  
40  
41  
42  
43  
44  
45  
46  
47  
48  
49  
50  
51  
52  
53  
54  
55  
56  
57  
58  
59  
60

## DISCUSSION

This Swedish nation-wide population-based study with prospectively collected data concerning singleton primiparous women showed that the mode of delivery differed over the maternal age strata. Significantly more normal vaginal deliveries and fewer CS and instrumental vaginal deliveries were seen among the teenagers and among women aged 20-24 compared with the reference group of women aged 25-29. The opposite was found among older women reaching a 4-fold increased risk for CS compared with women aged 20-24. The teenagers as well as women aged 20-24 were less prone to perineal lacerations and PPH exceeding 1000 ml. Prematurity (< 28 weeks of GA) was associated with very low maternal age (<17 years) among the adolescents although the increased risk was at the same level as among women aged 40 years and above, indicating a u-shaped risk curve. Adolescents were not afflicted more by preeclampsia than the reference women whereas the risk of preeclampsia increased significantly with advancing maternal age. The risk of placenta praevia increased dramatically with maternal age, actually a 500% increased risk was found after the age of 40 compared with the reference group. There was a significantly increased risk of stillbirth, SGA and low Apgar score only in women aged 30 years and over.

The most prominent difference between the findings in the present study and earlier studies is that no increased risk for SGA was found among the adolescents and young mothers 20-24 years of age compared with the reference women.[8-9] It must be kept in mind that the definition of SGA may differ between countries. In the United States and Latin America SGA is usually defined as birth weight below the 10<sup>th</sup> percentile compared with two SD in the Nordic countries.[3, 9] Adjusted risks for SGA among teenagers, recently presented from Finland, one of the Nordic countries, showed no increased risk among the youngest mothers.[6] In that study the control group was defined in the same way as in the present study but the Finnish study did not adjust for smoking habits. We found that smoking in early pregnancy was a significant independent risk factor for SGA in all age groups but it was only in the young women below 25 years of age that the adjustment of smoking turned the statistically

1 60 significant crude ORs into non-significant adjusted OR values. The contrary was found for the older  
2  
3  
4 61 women where the already significant crude ORs for SGA even became increased. This observation  
5  
6 62 may support a biological explanation for SGA in the older women. Differences concerning the risk for  
7  
8 63 SGA could also be attributable to differences in socio-economic status. Chen et al. restricted their  
9  
10  
11 64 analysis to white married mothers with age-appropriate education level, adequate prenatal care, without  
12  
13 65 smoking and alcohol use during pregnancy but found the increased risk for SGA to persist.[3] Several  
14  
15 66 studies have shown low infant birth weight for adolescents as well as for mothers with advancing  
16  
17  
18 67 age.[18, 14, 30, 31] We failed to find such association among the adolescents, but in women with  
19  
20 68 advancing age the difference in birth weight was statistically significant although the difference lacked  
21  
22 69 clinical significance.

23  
24  
25 70 The finding of a preferable birth outcome with lower CS rates and lower rates of instrumental delivery  
26  
27 71 among teenagers compared with older women has been pinpointed to a lesser extent than observed  
28  
29  
30 72 adverse outcomes. Earlier studies have shown relatively consistent results concerning a decreased rate  
31  
32 73 of CS in the adolescent group and a higher rate in women with advancing age.[6, 8, 9, 12-18] We were  
33  
34 74 able to evaluate elective and emergency CS separately and the risks among the teenagers and mothers  
35  
36  
37 75 age 20-24 years were decreased for both types. This might indicate that the different risks concerning  
38  
39 76 CS among young and older mothers could not exclusively be explained by more CS on maternal  
40  
41 77 request among older mothers but may even be caused by biological factors. A low rate of instrumental  
42  
43  
44 78 deliveries and CS among adolescents and a high rate among older women have almost unanimously  
45  
46 79 been shown in several reports from high-income as well as low-income countries.[5, 7, 12-18, 30-33]  
47  
48  
49 80 Whether this phenomenon depends on differences in handling the delivery, inherent or cultural  
50  
51 81 behavioural, domestic or social attitudes among the obstetric staff or biological factors has not been  
52  
53 82 investigated. Advancing age is associated with impaired uterine contractility as well as endothelial  
54  
55  
56 83 dysfunction which theoretically may lead to impaired uterine and utero-placental function.[34, 35] The  
57  
58 84 fact that adolescents in our study had a lower risk of induction of labour, perineal laceration, PPH,  
59  
60

1 85 abruption (except for the very young women) and placenta previa and women with advancing age had  
2  
3  
4 86 higher risks of all these outcomes including preeclampsia could support a biological explanation.  
5  
6 87 Concerning prematurity the age related risk curve was U shaped. This may also support a biological  
7  
8 88 aetiology; immaturity of the uterus in the very young women that obstruct development of a term  
9  
10  
11 89 pregnancy and uterine dysfunction caused by ageing processes in women with advancing age and  
12  
13 90 consequently deliver prematurely in both situations. The neonatal outcomes followed almost the same  
14  
15 91 pattern; foetal distress, meconium aspiration, stillbirth, SGA and low Apgar score were exclusively  
16  
17  
18 92 attributed to women older than 29.  
19  
20 93 The strength of this study is that it deals with the outcomes in the population of an entire country where  
21  
22 94 the antenatal care program is equally available to all pregnant women and is comprehensive. In Sweden  
23  
24  
25 95 pregnant women have completely cost free access to antenatal and obstetric facilities; poverty and  
26  
27 96 malnutrition are practically non-existent and the vast majority of women attends the antenatal care  
28  
29  
30 97 program (99%) independent of socio-economic status and is delivered in obstetric units.[21] This  
31  
32 98 context is valid for the whole study period. Another advantage is the large number of individuals  
33  
34 99 available for evaluation, which makes it possible to divide the study population into subgroups with  
35  
36  
37 100 sufficient numbers in each stratum to provide high statistical power. A sufficient number of study  
38  
39 101 subjects made it possible to evaluate three subgroups of young maternal age. Only primiparous women  
40  
41 102 were included in order to avoid the confounding effects of factors associated with subsequent  
42  
43  
44 103 deliveries. There are limitations that should be considered. The external validity is reduced to facilities  
45  
46 104 with similar socio-economic and demographic characteristics and health care systems with comparable  
47  
48  
49 105 standards. The drawback is obvious given the large size of the study and the numbers of health care  
50  
51 106 units involved that the criteria for diagnosis (ICD codes) to define outcomes may not be uniform across  
52  
53 107 the study population but the variation is most likely not related to maternal age. The MBR contain a  
54  
55  
56 108 large body of information concerning the mother and the child which made it possible to adjust the  
57  
58 109 results for confounding factors. At the same time this is a limitation as only the data available in the  
59  
60

1 110 register could be used for adjustments. The register lacks information on ethnicity and socio-economic  
2  
3  
4 111 status. Our effort was to evaluate obstetric and neonatal outcome in different maternal age groups  
5  
6 112 compared with women aged 25-29 overall. The only stratifications made were for year of birth,  
7  
8 113 maternal BMI and smoking in early pregnancy. The data on year of birth showed that there is  
9  
10  
11 114 variability in the existence of obstetric and neonatal diagnoses during the observation period. This may  
12  
13 115 be due to true changes but may also be a result of changes in recording, including the expanding use of  
14  
15 116 computerized medical records. It was therefore necessary to adjust for year of birth. Maternal BMI,  
16  
17  
18 117 maternal smoking and gestational age (for some relevant outcomes) were included in the adjusted  
19  
20 118 analyses based on their well known association with maternal and foetal outcome.[26,27] Putative  
21  
22 119 confounders and intermediaries were not identified with statistical analysis. To demonstrate causality  
23  
24  
25 120 between the different outcomes evaluated in the analyses and maternal age a great number of putative  
26  
27 121 intermediaries could have been considered such as the use of fertility treatment, foetal size, gestational  
28  
29  
30 122 weight gain etc., but that was not the purpose of the study. There may be other variables (which are not  
31  
32 123 intermediaries) but we have not been able to identify them. The proportion of missing data concerning  
33  
34 124 the included confounders could have affected the results. The youngest age group had the highest  
35  
36  
37 125 frequency of missing data on BMI (20.7%) and smoking (7.7%) compared with the reference group  
38  
39 126 (13.1% and 4.9%, respectively). The distribution of BMI in the youngest age group was almost equal to  
40  
41 127 the other maternal age groups. One explanation for a higher proportion of missing data in the youngest  
42  
43  
44 128 age group could be a later detection of their pregnancies and attendance to the antenatal care and  
45  
46 129 questions concerning exposure in early pregnancy were not raised. Gestational age could be calculated  
47  
48  
49 130 for more than 99% of the study subjects in this study with just minimal variations between maternal  
50  
51 131 age groups.  
52  
53 132 Our approach of analysing the data may be a benefit for clinicians interpreting the results when dealing  
54  
55  
56 133 with young and aged mothers.  
57  
58  
59  
60

1 134 In conclusion, in a country with a highly developed social and antenatal maternity health care security  
2  
3  
4 135 system giving cost free maternity and obstetric care to all pregnant women adolescents had a decreased  
5  
6 136 risk for adverse obstetric and neonatal outcome compared with the reference group. In the same social  
7  
8 137 context childbirth at advanced maternal age was associated with a number of serious complications for  
9  
10  
11 138 both the woman and the child. For clinicians counselling young mothers it is of great importance to  
12  
13 139 highlight the positive consequences that less obstetric complications and favourable neonatal outcomes  
14  
15 140 are expected. The results imply that there is a need for individualizing the antenatal surveillance  
16  
17  
18 141 programs and obstetric care based on age grouping in order to attempt to improve the outcomes in the  
19  
20 142 age groups with less favourable obstetric and neonatal outcomes. Such changes in surveillance  
21  
22  
23 143 programs and obstetric interventions need to be evaluated in further studies.  
24  
25 144  
26  
27  
28  
29  
30  
31  
32  
33  
34  
35  
36  
37  
38  
39  
40  
41  
42  
43  
44  
45  
46  
47  
48  
49  
50  
51  
52  
53  
54  
55  
56  
57  
58  
59  
60



1  
2  
3  
4  
5  
6  
7  
8  
9  
10  
11  
12  
13  
14  
15  
16  
17  
18  
19  
20  
21  
22  
23  
24  
25  
26  
27  
28  
29  
30  
31  
32  
33  
34  
35  
36  
37  
38  
39  
40  
41  
42  
43  
44  
45  
46  
47  
48  
49  
50  
51  
52  
53  
54  
55  
56  
57  
58  
59  
60

145 **Funding:** The study was supported financially by grants from the County Council of Östergötland and  
146 Linköping University.

147 **Disclosure of interest:** None of the authors has any conflict of interest to declare.

148 **Contribution of authorship:** The study was planned and conducted by PK, MB and RBT, Data was  
149 analysed by all three. All authors contributed to the interpretation of the results, the elaboration of the  
150 manuscript and approval of the final version.

151 **Checklist:** The manuscript conforms to the STROBE requirement.

152 **Data sharing statement:** Technical appendix, statistical code, and dataset available from the  
153 corresponding author at Dryad repository, who will provide a permanent, citable and open access home  
154 for the dataset.

**REFERENCE LIST**

1. Olausson PM, Cnattingius S, Goldenberg RL. Determinants of poor pregnancy outcomes among teenagers in Sweden. *Obstet Gynecol* 1997;89:451-7.
2. Olausson PO, Cnattingius S, Haglund B. Teenage pregnancies and risk of late fetal death and infant mortality. *Br J Obstet Gynaecol* 1999;106:116-21.
3. Chen XK, Wen SW, Fleming N, et al. Teenage pregnancy and adverse birth outcomes: a large population based retrospective cohort study. *Int J Epidemiol* 2007;36:368-73.
4. Gupta N, Kiran U, Bhal K. Teenage pregnancies: obstetric characteristics and outcome. *Eur J Obstet Gynecol Reprod Biol* 2008;137:165-71.
5. de Vienne CM, Creveuil C, Dreyfus M. Does young maternal age increase the risk of adverse obstetric, fetal and neonatal outcomes: a cohort study. *Eur J Obstet Gynecol Reprod Biol* 2009;147:151-6.
6. Leppälähti S, Gissler M, Mentula M, et al. Is teenage pregnancy an obstetric risk in a welfare society? A population-based study in Finland, from 2006 to 2011. *BMJ Open* 2013;19:3:e003225.
7. Lao TT, Ho LF. Obstetric outcome of teenage pregnancies. *Hum Reprod* 1998;13:3228-32.
8. Malabarey OT, Balayla J, Klam SL, et al. Pregnancies in young adolescent mothers: a population-based study on 37 million births. *J Pediatr Adolesc Gynecol* 2012;25:98-102.
9. Conde-Agudelo A, Belizán JM, Lammers C. Maternal-perinatal morbidity and mortality associated with adolescent pregnancy in Latin America: Cross-sectional study. *Am J Obstet Gynecol* 2005;192:342-9.
10. Mukhopadhyay P, Chaudhuri RN, Paul B. Hospital-based perinatal outcomes and complications in teenage pregnancy in India. *J Health Popul Nutr* 2010;28:494-500.
11. Ayuba II, Gani O. Outcome of teenage pregnancy in the niger delta of Nigeria. *Ethiop J Health Sci* 2012;22:45-50.

- 1 180 12. Jolly M, Sebire N, Harris J, et al. The risks associated with pregnancy in women aged 35 years or  
2  
3  
4 181 older. *Hum Reprod* 2000;15:2433-7.
- 5  
6 182 13. Jacobsson B, Ladfors L, Milsom I. Advanced maternal age and adverse perinatal outcome. *Obstet*  
7  
8 183 *Gynecol* 2004;104:727-33.
- 9  
10  
11 184 14. Cleary-Goldman J, Malone FD, Vidaver J, et al. Impact of maternal age on obstetric outcome.  
12  
13 185 *Obstet Gynecol* 2005;105:983-90.
- 14  
15 186 15. Joseph KS, Allen AC, Dodds L, et al. The perinatal effects of delayed child bearing. *Obstet*  
16  
17  
18 187 *Gynecol* 2005;105:1410-8.
- 19  
20 188 16. Luke B, Brown MB. Elevated risks of pregnancy complications and adverse outcomes with  
21  
22 189 increasing maternal age. *Hum Reprod* 2007;22:1264-72.
- 23  
24  
25 190 17. Delbaere I, Verstraelen H, Goetgeluk S, et al. Pregnancy outcome in primiparae of advanced  
26  
27 191 maternal age. *Eur J Obstet Gynecol Reprod Biol* 2007;135:41-6.
- 28  
29  
30 192 18. Hsieh TT, Liou JD, Hsu JJ, et al. Advanced maternal age and adverse perinatal outcomes in an  
31  
32 193 Asian population. *Eur J Obstet Gynecol Reprod Biol* 2010;148:21-6.
- 33  
34 194 19. Matsuda Y, Kawamichi Y, Hayashi K, et al. Impact of maternal age on the prevalence of  
35  
36 195 obstetrical complications in Japan. *J Obstet Gynaecol Res* 2011;37:1409-14.
- 37  
38  
39 196 20. Biro MA, Davey MA, Carolan M, et al. Advanced maternal age and obstetric morbidity for  
40  
41 197 women giving birth in Victoria, Australia: A population-based study. *Aust N Z J Obstet*  
42  
43 198 *Gynaecol*.2012;52:229-34.
- 44  
45  
46 199 21. Lindmark G, Cnattingius S. The scientific basis of antenatal care routines: Report from a state-of-  
47  
48 200 art conference. *Acta Obstet Gynecol Scand* 1991;70:105-9.
- 49  
50  
51 201 22. Källen B, Källen K, Olausson PO. The Swedish Medical Birth Register: a summary of content  
52  
53 202 and quality. Research Report, Article no: 2003-112-3. Centre for Epidemiology, National Board  
54  
55 203 of Health and Welfare Stockholm 2003. Available from:  
56  
57  
58 204 <http://www.socialstyrelsen.se/publikationer2003/2003-112-3> (Accessed May 2014.)  
59  
60

- 1 205 23. Cnattingius S, Ericson A, Gunnarskog J, et al. A quality study of a medical birth registry. *Scand J*  
2  
3  
4 206 *Soc Med* 1990;18:143–8.
- 5  
6 207 24. Axelsson O. The Swedish medical birth register. *Acta Obstet Gynecol Scand* 2003;82:491.  
7
- 8 208 25. Källén B. A birth weight for gestational age standard based on data in the Swedish Medical Birth  
9  
10  
11 209 Registry, 1985-1989. *Eur J Epidemiol* 1995;11:601-6.  
12
- 13 210 26. Cedergren MI. Maternal morbid obesity and the risk of adverse pregnancy outcome. *Obstet*  
14  
15 211 *Gynecol* 2004;103:219-24.  
16  
17
- 18 212 27. Källén K. The impact of maternal smoking during pregnancy on delivery outcome. *Eur J Public*  
19  
20 213 *Health*. 2001;11:329-33.  
21
- 22  
23 214 28. Delnord M, Blondel B, Drewniak N, et al. Varying **gestational age** patterns in **cesarean**  
24  
25 215 delivery: an international comparison. *BMC Pregnancy Childbirth*. 2014;14:321. [Epub ahead of  
26  
27 216 print].  
28
- 29  
30 217 29. Morisaki N, Togoobaatar G, Vogel JP, et al. Risk factors for spontaneous and provider-initiated  
31  
32 218 preterm delivery in high and low Human Development Index countries: a secondary analysis of  
33  
34 219 the World Health Organization Multicountry Survey on Maternal and Newborn Health. *BJOG*.  
35  
36  
37 220 2014;121 Suppl 1:101-9. doi: 10.1111/1471-0528.12631.  
38
- 39 221 30. Shrim A, Ates S, Mallozzi A, et al. Is young maternal age really a risk factor for adverse  
40  
41 222 pregnancy outcome in a Canadian tertiary referral hospital? *J Pediatr Adolesc Gynecol*  
42  
43  
44 223 2011;24:218-22.  
45
- 46 224 31. Jivraj S, Nazzal Z, Davies P, et al. Obstetric outcome of teenage pregnancies from 2002 to 2008:  
47  
48  
49 225 the Sheffield experience. *J Obstet Gynaecol* 2010;30:253-6.  
50
- 51 226 32. Beyer DA, Amari F, Diedrich K, et al. Teenage deliveries in Northern Germany: always a risk  
52  
53 227 factor for higher surgical delivery rates? *Arch Gynecol Obstet* 2011;284:535-8.  
54
- 55  
56 228 33. Jolly MC, Sebire N, Harris J, et al. Obstetric risks of pregnancy in women less than 18 years old.  
57  
58 229 *Obstet Gynecol* 2000;96:962-6.  
59  
60

- 1 230 34. Nelson SM, Telfer EE, Anderson RA. The ageing ovary and uterus: new biological insights. Hum  
2  
3  
4 231 Reprod Update 2013 ;19:67-83.  
5  
6 232 35. Taddei S, Virdis A, Ghiadoni L, et al. Endothelium, aging, and hypertension. Curr Hypertens Rep  
7  
8 233 2006;8:84-9.  
9  
10

## 19 237 LEGENDS

20  
21  
22 238 Figure 1. Adjusted mean birth weight of neonates in singleton primiparous women in different  
23  
24 239 maternal age groups. Birth weight adjusted for gestational age, maternal BMI and smoking habits, and  
25  
26 240 year of delivery. Plots indicate means and bars 95% CI.  
27  
28  
29  
30  
31  
32  
33  
34  
35  
36  
37  
38  
39  
40  
41  
42  
43  
44  
45  
46  
47  
48  
49  
50  
51  
52  
53  
54  
55  
56  
57  
58  
59  
60

1  
2 1  
3  
4 2 **Impact of maternal age on obstetric and neonatal outcome with**  
5  
6  
7 3 **emphasis on primiparous adolescents and older women-a Swedish**  
8  
9  
10 4 **Medical Birth Register Study.**  
11  
12  
13  
14 5

15  
16 6 Marie Blomberg MD, PhD, Rasmus Birch Tyrberg, BMs, and Preben Kjølhede, MD, PhD  
17  
18 7 Department of Obstetrics and Gynaecology and Department of Clinical and Experimental Medicine,  
19  
20  
21 8 Linköping University, Linköping, Sweden  
22  
23  
24 9

25  
26 10 Corresponding author:  
27

28 11 Marie Blomberg, MD, PhD  
29

30 12 Department of Obstetrics and Gynaecology,  
31

32  
33 13 University Hospital  
34

35 14 581 85 Linköping  
36

37 15 Sweden  
38  
39

40 16 Phone +46 10 103 00 00  
41

42 17 E-mail: marie.blomberg@lio.se  
43  
44

45 18 Keywords: maternal age, mode of delivery, neonatal outcome, obstetric outcome, adolescents  
46

47 19 | Word count: ~~3607~~3598 words  
48  
49  
50 20  
51  
52  
53 21  
54  
55 22  
56  
57  
58 23  
59  
60

## Abstract

**Objectives:** To evaluate the associations between maternal age and obstetric and neonatal outcomes in primiparous women with emphasis on teenagers and older women.

**Design:** A population-based cohort study.

**Setting:** The Swedish Medical Birth Register.

**Participants:** Primiparous women with singleton births from 1992 through 2010 (N=798,674) were divided into seven age groups: <17 years, 17-19 years, and additional five five-year classes. The reference group consisted of the women age 25-29 years.

**Primary outcome:** Obstetric and neonatal outcome.

**Results:** The teenager groups had significantly more vaginal births (aOR 2.04 (1.79-2.32) and 1.95 (1.88-2.02) for age <17 years and 17-19 years, respectively); fewer caesarean sections (aOR 0.57 (0.48-0.67) and 0.55 (0.53-0.58)), and instrumental vaginal births (aOR 0.43 (0.36-0.52) and 0.50 (0.48-0.53)) compared with the reference group. The opposite was found among older women reaching a 4-fold increased odds ratio for caesarean section. The teenagers showed no increased risk of adverse neonatal outcome but presented an increased risk of prematurity <32 weeks (aOR 1.66 (1.10-2.51) and 1.20 (1.04-1.38)). Women with advancing age ( $\geq 30$  years) revealed significantly increased risk of prematurity, perineal lacerations, preeclampsia, abruption, placenta previa, postpartum haemorrhage and unfavourable neonatal outcomes compared with the reference group.

**Conclusions:** For clinicians counselling young women it is of importance to highlight the obstetrically positive consequences that fewer maternal complications and favourable neonatal outcomes are expected. The results imply that there is a need for individualizing the antenatal surveillance programs and obstetric care based on age grouping in order to attempt to improve the outcomes in the age groups with less favourable obstetric and neonatal outcomes. Such changes in surveillance programs and obstetric interventions need to be evaluated in further studies.

1 49 **Article summary**

2  
3  
4 50 **Impact of maternal age on obstetric and neonatal outcome with emphasis on primiparous**  
5  
6 51 **adolescents and older women-a Swedish Medical Birth Register Study.**

7  
8  
9 52 Strengths and limitations of this study:

- 10  
11 53 • A strength of the present study is that it includes primiparous women of an entire country where  
12  
13 the antenatal care program is equally available to all pregnant women and is comprehensive.  
14 54  
15  
16 55 • Another advantage is the large number of individuals available for evaluation, which makes it  
17  
18 possible to divide the study population into subgroups with sufficient numbers in each stratum  
19 56  
20  
21 57 to provide high statistical power.  
22  
23 58 • A limitation is that the external validity is reduced to facilities with similar socio-economic and  
24  
25 demographic characteristics and health care systems with comparable standards.  
26 59  
27  
28 60 • The Swedish medical birth register contain a large body of information concerning the mother  
29  
30 and the child but only the available data in the register could be used for outcome evaluation  
31 61  
32  
33 62 and adjustments for putative confounders.  
34

35 63  
36  
37  
38  
39  
40  
41  
42  
43  
44  
45  
46  
47  
48  
49  
50  
51  
52  
53  
54  
55  
56  
57  
58  
59  
60



## 64 INTRODUCTION

65 There are a large number of studies evaluating obstetric and neonatal outcome over the full range of  
66 reproductive maternal ages, but especially with a focus on the youngest and the oldest mothers. Young  
67 mothers have been shown to be exposed to an increased risk of anaemia, low birth weight, foetal death,  
68 eclampsia and preterm birth although they at the same time were more likely to have a spontaneous  
69 normal vaginal birth and the risk of preeclampsia and post-partum haemorrhage were significantly  
70 decreased.[1-6] These studies evaluated outcomes in low-income countries. Many studies performed in  
71 low-income countries presented in recent years on the topic of teenage pregnancies have found similar  
72 obstetric and neonatal outcomes.[7-11]

73 Complications during pregnancy and birth at advanced maternal age (either defined as 35 years and  
74 older or 40 years or older) have also been evaluated in high-income countries. Advanced maternal age  
75 at birth has been found to be associated with gestational diabetes, preeclampsia, placenta previa,  
76 caesarean section (CS), placental abruption, preterm delivery, low birth weight, intrauterine foetal  
77 death and an increased perinatal mortality.[12-20] The difference in obstetric and neonatal outcomes  
78 between teenagers and women at advanced age seemed to be lower risks for several unwanted and  
79 threatening outcomes in the teenage group; thus there were no obvious advantages concerning obstetric  
80 and neonatal outcomes at advanced maternal ages. The earlier published studies concerning the impact  
81 of maternal age on perinatal outcome differ in many aspects methodologically as well as in the socio-  
82 demographic characteristics of the populations and health care systems. All these factors make  
83 interpretation of comparisons between data sets difficult.

84 Sweden has during several decades actively developed strategies in social care, education and health  
85 care in order to improve antenatal care and parenthood. In a Swedish state-of-the-art conference held in  
86 1990, the scientific basis of the routine antenatal program was critically evaluated. It was concluded  
87 that the scientific evidence to support the timing and contents of routine visits was unsatisfactory.[21]  
88 Consequently there is a constant need for evaluation both of single diagnostic procedures and

1 89 intervention and of outcomes. An analysis of perinatal outcomes in relation to maternal age in the  
2  
3  
4 90 Swedish population will provide important knowledge that may be used to further improve social,  
5  
6 91 antenatal, obstetric and neonatal care and reveals risk groups that in particular may need more attention  
7  
8 92 in the antenatal care.  
9

10 93 The objective of the present study was to assess the impact of maternal age on obstetric and neonatal  
11  
12  
13 94 outcomes among singleton primiparous women in Sweden, with special emphasis on the adolescents  
14  
15 95 and older mothers.  
16

17 96  
18  
19  
20  
21  
22  
23  
24  
25  
26  
27  
28  
29  
30  
31  
32  
33  
34  
35  
36  
37  
38  
39  
40  
41  
42  
43  
44  
45  
46  
47  
48  
49  
50  
51  
52  
53  
54  
55  
56  
57  
58  
59  
60

## 97 MATERIALS AND METHODS

98 This study analyses the obstetric and neonatal outcomes of all singleton primiparous women  
99 prospectively registered in the Swedish Medical Birth Register (MBR) who gave births from January 1,  
100 1992 through December 31, 2010. MBR has collected information about births in Sweden since 1973.  
101 It is compulsory for every health care provider to report to the MBR. Medical and other data on almost  
102 all (99%) births in Sweden are listed in the register, which also includes stillbirths. Starting with the  
103 first antenatal visit, usually in gestational week 10-12, the information is collected prospectively in  
104 standardized medical record forms completed at the maternity health care centers at antenatal care  
105 visits, in the birth units, and at the paediatric examination of the newborn. The standardized medical  
106 records are identical throughout the country. A description and validation of the register content is  
107 available.[22-24]

108 The study population was grouped according to maternal age into seven subgroups: <17 years; 17-19  
109 years; 20-24 years, 25-29 years, 30-34 years; 35-39 years and 40+ years. In the outcome analyses we  
110 selected the group of women age 25-29 years as reference group.

111 The list of available variables in MBR has been extended throughout the years that the register has  
112 been active. The obstetric and neonatal outcome data for the purpose of this study are those that have  
113 been available since 1992. From 1992 until June 2008 the MBR includes stillbirths after 28 weeks of  
114 gestation and from July 2008 until 2010 all stillbirths after 22 weeks of gestation are included. Each  
115 outcome studied was either marked in the MBR or registered according to the International Statistical  
116 Classification of Diseases and Related Health Problems (ICD). The obstetric outcome variables studied  
117 were gestational age, mode of delivery; normal vaginal birth (defined as neither instrumental vaginal  
118 delivery, nor CS), CS, instrumental vaginal delivery divided into forceps and vacuum extraction, mode  
119 of onset of labour, perineal laceration, preeclampsia, abruption placentae, placenta previa, use of  
120 epidural analgesia and postpartum haemorrhage (PPH) exceeding 1000 ml. The foetal and neonatal  
121 outcomes evaluated were Apgar-score at 5 minutes, foetal distress (ICD code P20.0, P20.1 and P20.9),

1 122 aspiration of meconium (ICD code P24.0), shoulder dystocia (ICD code O66.0), and stillbirth. Small-  
2  
3  
4 123 for-gestational age (SGA) newborns were defined as those with birth weight more than 2 standard  
5  
6 124 deviations (SD) below the mean birth weight for gestational age (sex and parity specific) according to a  
7  
8 125 Swedish reference curve.[25] Large-for-gestational age (LGA) newborns were those with a birth  
9  
10  
11 126 weight above 2 SD. All descriptive and background data were extracted from the MBR. The register  
12  
13 127 information on these variables was obtained from the antenatal care center records.  
14  
15  
16 128 The study was approved by the Regional Ethical Review Board in Linköping, Sweden (Dnr 2011/479-  
17  
18 129 31. Approved January 25; 2012).

### 21 130 **Statistical analysis**

22  
23 131 Data are presented as counts and per cent or mean and one SD. Logistic regression analyses were used  
24  
25 132 for comparison of groups for categorical data. Data on a continuous scale were compared using  
26  
27  
28 133 analysis of covariance (ANCOVA). Multivariate logistic regression models were used in order to adjust  
29  
30 134 comparisons for the confounding factors. Consequently crude and adjusted odds ratios (OR and aOR)  
31  
32  
33 135 and 95% confidence intervals (CIs) are reported. Maternal weight and height (used for calculation of  
34  
35 136 maternal Body Mass Index (BMI)) and smoking habits in early pregnancy (unknown, no smoking,  
36  
37 137 smoking) and year of birth were included as confounders in the adjusted analyses. The simultaneous  
38  
39  
40 138 model of including independent variables in the multivariate logistic regression was used since we  
41  
42 139 found it most appropriate for the relevance of the research goal of the study. Such a research strategy is  
43  
44 140 appropriate when there is no logical or theoretical basis for considering any variable to be prior to any  
45  
46  
47 141 other, either in terms of a hypothetical causal structure of the data or in terms of its relevance to the  
48  
49 142 research goals of focusing on prediction and explanation.

50  
51  
52 143 The rationale for including year of birth as an independent variable was that there was variability in the  
53  
54 144 occurrence of obstetric and neonatal diagnoses during the observation period. This may be due to true  
55  
56 145 changes but may also be a result of changes in recording with expanding use of computerized medical  
57  
58  
59 146 records. Maternal BMI and smoking was included as covariates in the adjusted analyses based on their  
60

1 147 well-known associations with maternal and foetal outcome and their unequal distribution over the  
2  
3  
4 148 maternal age strata.[26,27] BMI was included as a continuous variable as the distribution of maternal  
5  
6 149 BMI was almost uniform over the maternal age strata and the association between BMI and maternal  
7  
8  
9 150 age was almost linear (presented as means and standard deviations in Table 1). For the purpose of this  
10  
11 151 study gestational age was added to the confounders in the analyses of CS, preeclampsia and birth  
12  
13 152 weight based on their clinically well-known associations.[25,28,29] The OR for instrumental vaginal  
14  
15 153 delivery was calculated among women with vaginal births only in order to exclude women with an  
16  
17  
18 154 instrumental attempt to deliver followed by an emergency CS. The ORs of perineal lacerations were  
19  
20 155 also estimated among women with vaginal births only. The information concerning use of epidural  
21  
22 156 analgesia was also restricted to vaginal births only. Epidural is an analgesic method that has been  
23  
24  
25 157 widely used in the delivery wards for vaginal births during the entire time period. In contrast the use of  
26  
27 158 epidural analgesia in CS has varied substantially over the time period and has almost exclusively been  
28  
29  
30 159 used in elective CS. Our purpose was to evaluate the odds ratio for epidural use over the maternal age  
31  
32 160 strata and consequently we selected the mode of delivery that exhibited the least variation in the use of  
33  
34 161 the analgesic method over the time period, i.e. vaginal births.  
35  
36  
37 162 The software STATISTICA 64 version 10 (StatSoft Inc. 2300 East 14<sup>th</sup> St. Tulsa, OK 74104 USA) was  
38  
39 163 used to carry out the statistical analyses.  
40  
41  
42 164  
43  
44  
45  
46  
47  
48  
49  
50  
51  
52  
53  
54  
55  
56  
57  
58  
59  
60

**RESULTS**

In the period 1992 – 2010, 798,732 women were registered in the MBR as giving birth to their first child. The annual number of primiparous women giving birth varied between 34060 and 49417. Information on maternal age was missing in 58 cases leaving 798,674 women for the analyses. The average age of primiparous women increased substantially from 26.2 years in 1992 to 28.5 in 2004; hereafter it has stayed almost constant at that level. The demographic, obstetric and neonatal data subdivided into maternal age groups are presented in Table 1 and 2.

Table 1. Descriptive data of primiparous women with singleton births in the period 1992-2010.

| Characteristics               | < 17 years<br>(n=2392) |       | 17-19 years<br>(n=29816) |       | 20-24 years<br>(n=185942) |       | 25-29 years<br>(n=300822) |       | 30-34 years<br>(n=205905) |       | 35-39 years<br>(n=63163) |       | 40+ years<br>(n=10634) |       |
|-------------------------------|------------------------|-------|--------------------------|-------|---------------------------|-------|---------------------------|-------|---------------------------|-------|--------------------------|-------|------------------------|-------|
| <i>BMI (kg/m<sup>2</sup>)</i> | 22.8                   | 3.7   | 23.2                     | 4.1   | 23.8                      | 4.3   | 23.7                      | 4.0   | 23.8                      | 4.0   | 24.4                     | 4.1   | 24.7                   | 4.3   |
| <i>BMI<sup>†</sup> class</i>  |                        |       |                          |       |                           |       |                           |       |                           |       |                          |       |                        |       |
| <18.5 kg/m <sup>2</sup>       | 135                    | 5.6%  | 1815                     | 6.1%  | 7650                      | 4.1%  | 7509                      | 2.5%  | 3847                      | 1.9%  | 918                      | 1.5%  | 133                    | 1.3%  |
| 18.5-24.9 kg/m <sup>2</sup>   | 1352                   | 56.5% | 16823                    | 56.4% | 104600                    | 56.3% | 180163                    | 59.9% | 122571                    | 59.5% | 34439                    | 54.5% | 5381                   | 50.1% |
| 25.0-29.9 kg/m <sup>2</sup>   | 315                    | 13.2% | 4687                     | 15.7% | 33961                     | 18.3% | 53896                     | 17.9% | 37234                     | 18.1% | 13310                    | 21.1% | 2442                   | 23.0% |
| 30.0-34.9 kg/m <sup>2</sup>   | 81                     | 3.4%  | 1327                     | 4.5%  | 10550                     | 5.7%  | 14401                     | 4.8%  | 9389                      | 4.6%  | 3575                     | 5.7%  | 683                    | 6.4%  |
| 35.0-39.9 kg/m <sup>2</sup>   | 11                     | 0.5%  | 337                      | 1.1%  | 3013                      | 1.6%  | 4070                      | 1.4%  | 2724                      | 1.3%  | 1024                     | 1.6%  | 188                    | 1.8%  |
| ≥ 40.0 kg/m <sup>2</sup>      | 4                      | 0.2%  | 87                       | 0.3%  | 904                       | 0.5%  | 1312                      | 0.4%  | 944                       | 0.5%  | 342                      | 0.5%  | 68                     | 0.6%  |
| Missing data                  | 494                    | 20.7% | 4740                     | 15.9% | 25264                     | 13.6% | 39471                     | 13.1% | 29196                     | 14.2% | 9555                     | 15.1% | 1739                   | 16.4% |
| <i>Smoking<sup>†</sup></i>    |                        |       |                          |       |                           |       |                           |       |                           |       |                          |       |                        |       |
| Yes                           | 666                    | 27.8% | 9012                     | 30.2% | 31675                     | 17.0% | 24676                     | 8.2%  | 13971                     | 6.8%  | 5287                     | 8.4%  | 958                    | 9.0%  |
| No                            | 1542                   | 64.5% | 19154                    | 64.3% | 145695                    | 78.4% | 261348                    | 86.9% | 178792                    | 86.8% | 53416                    | 84.6% | 8883                   | 83.5% |
| Missing data                  | 184                    | 7.7%  | 1650                     | 5.5%  | 8572                      | 4.6%  | 14798                     | 4.9%  | 13142                     | 6.4%  | 4460                     | 7.0%  | 793                    | 7.5%  |
| <i>Gestational age</i>        |                        |       |                          |       |                           |       |                           |       |                           |       |                          |       |                        |       |
| Information available         | 2368                   | 99.0% | 29715                    | 99.7% | 185700                    | 99.9% | 300603                    | 99.9% | 205719                    | 99.9% | 63098                    | 99.9% | 10620                  | 99.9% |
| Missing data                  | 24                     | 1.0%  | 101                      | 0.3%  | 242                       | 0.1%  | 219                       | 0.1%  | 186                       | 0.1%  | 65                       | 0.1%  | 14                     | 0.1%  |

Figures denote mean and standard deviation or counts and proportions.

BMI = body mass index.

<sup>†</sup> Reported height, weight and smoking habits at first antenatal visit.

Table 2. Obstetric and neonatal outcome characteristics of primiparous women with singleton births in the period 1992-2010.

| Characteristics                                              | Age groups             |       |                          |       |                           |       |                           |       |                           |       |                          |       |                        |       |
|--------------------------------------------------------------|------------------------|-------|--------------------------|-------|---------------------------|-------|---------------------------|-------|---------------------------|-------|--------------------------|-------|------------------------|-------|
|                                                              | < 17 years<br>(n=2392) |       | 17-19 years<br>(n=29816) |       | 20-24 years<br>(n=185942) |       | 25-29 years<br>(n=300822) |       | 30-34 years<br>(n=205905) |       | 35-39 years<br>(n=63163) |       | 40+ years<br>(n=10634) |       |
| <i>Labour:</i>                                               |                        |       |                          |       |                           |       |                           |       |                           |       |                          |       |                        |       |
| Spontaneous onset labour                                     | 2055                   | 85.9% | 25853                    | 86.7% | 158879                    | 85.4% | 251340                    | 83.6% | 163876                    | 79.6% | 45330                    | 71.2% | 6261                   | 58.9% |
| Induced labour                                               | 184                    | 7.7%  | 2528                     | 8.5%  | 17433                     | 9.4%  | 30873                     | 10.3% | 25474                     | 12.4% | 10065                    | 15.9% | 2111                   | 19.9% |
| <i>Mode of delivery:</i>                                     |                        |       |                          |       |                           |       |                           |       |                           |       |                          |       |                        |       |
| Normal vaginal birth                                         | 2030                   | 84.9% | 25096                    | 84.2% | 147082                    | 79.1% | 219993                    | 73.1% | 135099                    | 65.6% | 35112                    | 55.6% | 4724                   | 44.4% |
| Forceps                                                      | 7                      | 0.3%  | 126                      | 0.4%  | 1143                      | 0.6%  | 2166                      | 0.7%  | 1515                      | 0.7%  | 575                      | 0.9%  | 84                     | 0.8%  |
| Vacuum extraction                                            | 143                    | 6.0%  | 2090                     | 7.0%  | 18011                     | 9.7%  | 36696                     | 12.2% | 29811                     | 14.5% | 10119                    | 16.0% | 1599                   | 15.0% |
| CS <sup>‡</sup>                                              | 213                    | 8.9%  | 2500                     | 8.4%  | 19747                     | 10.6% | 42044                     | 14.0% | 39534                     | 19.2% | 17355                    | 27.5% | 4226                   | 39.7% |
| CS elective 1999-2010 †                                      | 53                     | 2.2%  | 373                      | 1.3%  | 2828                      | 1.5%  | 6973                      | 2.3%  | 7656                      | 3.7%  | 3853                     | 6.1%  | 1132                   | 10.6% |
| CS acute 1999-2010 †                                         | 73                     | 3.1%  | 882                      | 3.0%  | 7092                      | 3.8%  | 16651                     | 5.5%  | 17953                     | 8.7%  | 7826                     | 12.4% | 1798                   | 16.9% |
| <i>Gestational age:</i>                                      |                        |       |                          |       |                           |       |                           |       |                           |       |                          |       |                        |       |
| GA < 28 weeks                                                | 20                     | 0.8%  | 107                      | 0.4%  | 464                       | 0.2%  | 743                       | 0.2%  | 640                       | 0.3%  | 292                      | 0.5%  | 73                     | 0.7%  |
| GA < 32 weeks                                                | 40                     | 1.7%  | 308                      | 1.0%  | 1436                      | 0.8%  | 2415                      | 0.8%  | 2048                      | 1.0%  | 900                      | 1.4%  | 206                    | 1.9%  |
| GA < 37 weeks                                                | 213                    | 8.9%  | 1937                     | 6.5%  | 11030                     | 5.9%  | 18005                     | 5.6%  | 12727                     | 6.2%  | 4586                     | 7.3%  | 877                    | 8.2%  |
| GA 37 – 41 weeks                                             | 1990                   | 83.2% | 25811                    | 86.6% | 161043                    | 86.6% | 257320                    | 85.5% | 172621                    | 83.8% | 51494                    | 81.5% | 8786                   | 82.6% |
| GA ≥ 42 weeks                                                | 165                    | 6.9%  | 1967                     | 6.6%  | 13627                     | 7.3%  | 25278                     | 8.4%  | 20371                     | 9.9%  | 7018                     | 11.1% | 957                    | 9.0%  |
| <i>Maternal complications and use of epidural analgesia:</i> |                        |       |                          |       |                           |       |                           |       |                           |       |                          |       |                        |       |
| Perineal laceration gr 1-2*                                  | 311                    | 14.3% | 3982                     | 14.6% | 32602                     | 19.6% | 70452                     | 27.3% | 55163                     | 33.2% | 15477                    | 33.9% | 2116                   | 33.1% |
| Perineal laceration gr 3-4*                                  | 23                     | 1.1%  | 272                      | 1.0%  | 3030                      | 1.8%  | 8202                      | 3.2%  | 6846                      | 4.1%  | 1856                     | 4.1%  | 222                    | 3.5%  |
| Preeclampsia                                                 | 43                     | 1.8%  | 576                      | 1.9%  | 4317                      | 2.3%  | 6520                      | 2.2%  | 4265                      | 2.1%  | 1610                     | 2.5%  | 365                    | 3.4%  |
| Abruptio placentae                                           | 16                     | 0.7%  | 135                      | 0.5%  | 643                       | 0.3%  | 1171                      | 0.4%  | 955                       | 0.5%  | 390                      | 0.6%  | 87                     | 0.8%  |
| Placenta previa                                              | 2                      | 0.1%  | 16                       | 0.1%  | 159                       | 0.1%  | 505                       | 0.2%  | 612                       | 0.3%  | 375                      | 0.6%  | 89                     | 0.8%  |
| PPH > 1000 ml (VB)                                           | 65                     | 3.0%  | 667                      | 2.4%  | 5078                      | 3.1%  | 10931                     | 4.2%  | 9720                      | 5.9%  | 3173                     | 6.9%  | 485                    | 7.6%  |
| PPH > 1000 ml (CS)                                           | 2                      | 0.9%  | 28                       | 1.1%  | 252                       | 1.3%  | 541                       | 1.3%  | 578                       | 1.5%  | 237                      | 1.4%  | 80                     | 1.9%  |
| Epidural analgesia*                                          | 903                    | 41.4% | 11569                    | 42.4% | 68332                     | 41.1% | 105266                    | 40.7% | 70691                     | 42.5% | 20151                    | 44.0% | 2743                   | 42.9% |



Table 2 continued. Obstetric and neonatal outcome characteristics of primiparous women with singleton births in the period 1992-2010.

| Characteristics        | Age groups             |      |                          |      |                           |      |                           |      |                           |      |                          |      |                        |      |
|------------------------|------------------------|------|--------------------------|------|---------------------------|------|---------------------------|------|---------------------------|------|--------------------------|------|------------------------|------|
|                        | < 17 years<br>(n=2392) |      | 17-19 years<br>(n=29816) |      | 20-24 years<br>(n=185942) |      | 25-29 years<br>(n=300822) |      | 30-34 years<br>(n=205905) |      | 35-39 years<br>(n=63163) |      | 40+ years<br>(n=10634) |      |
| <i>Neonatal</i>        |                        |      |                          |      |                           |      |                           |      |                           |      |                          |      |                        |      |
| Foetal distress        | 8                      | 0.3% | 122                      | 0.4% | 932                       | 0.5% | 1621                      | 0.5% | 1070                      | 0.5% | 388                      | 0.6% | 56                     | 0.5% |
| Aspiration of meconium | 0                      | 0%   | 30                       | 0.1% | 363                       | 0.2% | 649                       | 0.2% | 563                       | 0.3% | 193                      | 0.3% | 42                     | 0.4% |
| Shoulder dystocia      | 6                      | 0.3% | 78                       | 0.3% | 793                       | 0.4% | 1580                      | 0.5% | 1382                      | 0.7% | 489                      | 0.8% | 79                     | 0.7% |
| Stillbirth             | 7                      | 0.3% | 102                      | 0.3% | 571                       | 0.3% | 893                       | 0.3% | 768                       | 0.4% | 347                      | 0.5% | 87                     | 0.8% |
| SGA                    | 91                     | 3.8% | 1136                     | 3.8% | 6016                      | 3.2% | 8831                      | 2.9% | 7216                      | 3.5% | 2962                     | 4.7% | 617                    | 5.8% |
| LGA                    | 47                     | 2.0% | 539                      | 1.8% | 3838                      | 2.1% | 5943                      | 2.0% | 3846                      | 1.9% | 1279                     | 2.0% | 224                    | 2.1% |
| Apgar score < 7 at 5   | 43                     | 1.8% | 381                      | 1.3% | 2409                      | 1.3% | 4158                      | 1.4% | 3354                      | 1.6% | 1274                     | 2.0% | 240                    | 2.3% |
| Birth weight (gram)    | 3348                   | 592  | 3403                     | 565  | 3453                      | 554  | 3470                      | 555  | 3452                      | 572  | 3415                     | 612  | 3360                   | 640  |

Figures denote counts and proportions or mean and one standard deviation.

BMI = body mass index; CS = caesarean section; GA = gestational age at birth; LGA = large for gestational age; PPH = postpartum haemorrhage; SGA = small for gestational age; VB = vaginal birth

‡All CS independent of status of performance – acute or elective. †Caesarean section was subdivided into elective and acute CS from 1999.

\*Epidural analgesia and perineal lacerations in vaginal births only.

1  
2  
3  
4  
5  
6  
7  
8  
9  
10  
11  
12  
13  
14  
15  
16  
17  
18  
19  
20  
21  
22  
23  
24  
25  
26  
27  
28  
29  
30  
31  
32  
33  
34  
35  
36  
37  
38  
39  
40  
41  
42  
43  
44  
45  
46  
47  
48  
49  
50  
51  
52  
53  
54  
55  
56  
57  
58  
59  
60

The crude odds rates and the results of the multivariate analyses models of obstetric and neonatal outcomes are shown in Table 3 and 4, respectively.

For peer review only

Table 3. Obstetric outcome data in singleton primiparous women in the period 1992-2010 in relation to maternal age group.

| Characteristics          | Crude OR (95%CI) | aOR (95%CI)†     | Crude OR (95%CI) | aOR (95%CI)†     | Crude OR (95%CI) | aOR (95%CI)†     |
|--------------------------|------------------|------------------|------------------|------------------|------------------|------------------|
| <i>Labour</i>            | < 17 years       |                  | 17-19 years      |                  | 20-24 years      |                  |
| Spontaneous onset labour | 1.20 (1.07-1.35) | 1.20 (1.05-1.37) | 1.28 (1.24-1.33) | 1.26 (1.21-1.31) | 1.16 (1.14-1.17) | 1.16 (1.14-1.18) |
| Induced labour           | 0.73 (0.63-0.85) | 0.78 (0.66-0.93) | 0.81 (0.78-0.85) | 0.86 (0.82-0.90) | 0.90 (0.89-0.92) | 0.91 (0.90-0.93) |
|                          | 30 - 34 years    |                  | 35 - 39 years    |                  | 40+ years        |                  |
| Spontaneous onset labour | 0.77 (0.76-0.78) | 0.78 (0.77-0.79) | 0.50 (0.49-0.51) | 0.52 (0.51-0.54) | 0.29 (0.26-0.30) | 0.30 (0.28-0.31) |
| Induced labour           | 1.23 (1.21-1.26) | 1.19 (1.17-1.21) | 1.66 (1.62-1.70) | 1.54 (1.50-1.58) | 2.17 (2.06-2.27) | 1.97 (1.87-2.08) |
| <i>Mode of delivery</i>  | < 17 years       |                  | 17-19 years      |                  | 20-24 years      |                  |
| Normal vaginal birth     | 2.05 (1.84-2.30) | 2.04 (1.79-2.32) | 1.95 (1.89-2.02) | 1.95 (1.88-2.02) | 1.39 (1.37-1.41) | 1.39 (1.37-1.41) |
| Forceps*                 | 0.38 (0.18-0.81) | 0.41 (0.18-0.92) | 0.55 (0.46-0.64) | 0.48 (0.39-0.59) | 0.82 (0.76-0.88) | 0.77 (0.71-0.84) |
| Vacuum extraction‡       | 0.42 (0.36-0.51) | 0.43 (0.36-0.52) | 0.50 (0.48-0.53) | 0.50 (0.48-0.53) | 0.74 (0.72-0.75) | 0.74 (0.72-0.75) |
| CS. all                  | 0.60 (0.52-0.69) | 0.57 (0.48-0.67) | 0.56 (0.54-0.69) | 0.55 (0.53-0.58) | 0.73 (0.72-0.74) | 0.72 (0.71-0.74) |
| CS elective 1999-2010 †  | 0.95 (0.73-1.25) | 0.83 (0.60-1.14) | 0.53 (0.48-0.59) | 0.53 (0.47-0.60) | 0.65 (0.62-0.68) | 0.68 (0.65-0.71) |
| CS acute 1999-2010 †     | 0.54 (0.43-0.68) | 0.53 (0.40-0.69) | 0.52 (0.49-0.56) | 0.56 (0.52-0.61) | 0.68 (0.66-0.70) | 0.71 (0.69-0.73) |
|                          | 30 - 34 years    |                  | 35 - 39 years    |                  | 40+ years        |                  |
| Normal vaginal delivery  | 0.70 (0.69-0.71) | 0.72 (0.71-0.73) | 0.46 (0.45-0.47) | 0.48 (0.47-0.49) | 0.29 (0.28-0.31) | 0.31 (0.30-0.32) |
| Forceps*                 | 1.08 (1.01-1.15) | 1.20 (1.12-1.29) | 1.48 (1.35-1.63) | 1.66 (1.49-1.84) | 1.58 (1.27-1.98) | 1.75 (1.37-2.24) |
| Vacuum extraction‡       | 1.32 (1.30-1.34) | 1.29 (1.27-1.32) | 1.72 (1.67-1.76) | 1.67 (1.63-1.72) | 2.01 (1.90-2.13) | 1.92 (1.80-2.04) |
| CS. all                  | 1.46 (1.44-1.49) | 1.44 (1.42-1.47) | 2.34 (2.29-2.38) | 2.21 (2.16-2.26) | 4.07 (3.91-4.23) | 3.78 (3.61-3.96) |
| CS elective 1999-2010 †  | 1.63 (1.57-1.68) | 1.44 (1.39-1.49) | 2.74 (2.63-2.85) | 2.25 (2.15-2.35) | 5.03 (4.70-5.36) | 3.89 (3.61-4.20) |
| CS acute 1999-2010 †     | 1.63 (1.59-1.67) | 1.44 (1.40-1.47) | 2.41 (2.35-2.48) | 1.94 (1.88-2.00) | 3.47 (3.29-3.66) | 2.68 (2.52-2.85) |
| <i>Gestational age</i>   | < 17 years       |                  | 17-19 years      |                  | 20-24 years      |                  |
| GA < 28 weeks            | 3.44 (2.20-5.37) | 2.84 (1.59-5.06) | 1.46 (1.19-1.79) | 1.25 (0.97-1.62) | 1.01 (0.90-1.14) | 0.89 (0.77-1.02) |
| GA < 32 weeks            | 2.12 (1.55-2.91) | 1.66 (1.10-2.51) | 1.29 (1.15-1.46) | 1.20 (1.04-1.38) | 0.96 (0.90-1.03) | 0.92 (0.85-0.99) |
| GA < 37 weeks            | 1.55 (1.34-1.79) | 1.46 (1.24-1.72) | 1.09 (1.04-1.15) | 1.03 (0.98-1.09) | 0.99 (0.97-1.02) | 0.97 (0.95-1.00) |
| GA 37 – 41 weeks         | 0.89 (0.79-0.99) | 0.88 (0.77-0.99) | 1.11 (1.07-1.15) | 1.14 (1.09-1.18) | 1.10 (2.08-1.12) | 1.12 (1.10-1.14) |
| GA ≥ 42 weeks            | 0.82 (0.70-0.96) | 0.89 (0.75-1.06) | 0.77 (0.74-0.81) | 0.79 (0.74-0.83) | 0.86 (0.84-0.88) | 0.85 (0.83-0.87) |
|                          | 30 - 34 years    |                  | 35 - 39 years    |                  | 40+ years        |                  |
| GA < 28 weeks            | 1.26 (1.13-1.40) | 1.17 (1.04-1.33) | 1.88 (1.64-2.15) | 1.61 (1.40-1.90) | 2.79 (2.19-3.56) | 2.48 (1.86-3.29) |
| GA < 32 weeks            | 1.24 (1.17-1.32) | 1.24 (1.16-1.33) | 1.79 (1.65-1.93) | 1.68 (1.53-1.84) | 2.44 (2.12-2.82) | 2.25 (1.90-2.66) |
| GA < 37 weeks            | 1.04 (1.01-1.06) | 1.02 (0.99-1.05) | 1.23 (1.19-1.27) | 1.19 (1.15-1.24) | 1.41 (1.32-1.52) | 1.37 (1.26-1.48) |
| GA 37 – 41 weeks         | 0.88 (0.86-0.89) | 0.89 (0.86-0.89) | 0.75 (0.73-0.76) | 0.76 (0.74-0.78) | 0.81 (0.77-0.85) | 0.83 (0.79-0.88) |
| GA ≥ 42 weeks            | 1.20 (1.17-1.22) | 1.20 (1.18-1.23) | 1.36 (1.33-1.40) | 1.35 (1.31-1.39) | 1.08 (1.01-1.15) | 1.06 (0.98-1.14) |

Table 3 continued. Obstetric outcome data in singleton primiparous women in the period 1992-2010 in relation to maternal age group.

| Characteristics                                              | Crude OR (95%CI) | aOR (95%CI) <sup>†</sup> | Crude OR (95%CI) | aOR (95%CI) <sup>†</sup> | Crude OR (95%CI) | aOR (95%CI) <sup>†</sup> |
|--------------------------------------------------------------|------------------|--------------------------|------------------|--------------------------|------------------|--------------------------|
| <i>Maternal complications and use of epidural analgesia:</i> |                  |                          |                  |                          |                  |                          |
|                                                              | < 17 years       |                          | 17-19 years      |                          | 20-24 years      |                          |
| Perineal laceration grade 1-2 <sup>‡</sup>                   | 0.44 (0.39-0.50) | 0.44 (0.38-0.50)         | 0.46 (0.44-0.47) | 0.47 (0.45-0.49)         | 0.65 (0.64-0.66) | 0.68 (0.67-0.69)         |
| Perineal laceration grade 3-4 <sup>‡</sup>                   | 0.33 (0.22-0.49) | 0.39 (0.25-0.60)         | 0.31 (0.25-0.37) | 0.37 (0.32-0.42)         | 0.57 (0.54-0.59) | 0.61 (0.58-0.64)         |
| Preeclampsia                                                 | 0.83 (0.61-1.12) | 0.89 (0.62-1.27)         | 0.89 (0.82-0.97) | 0.93 (0.84-1.02)         | 1.07 (1.03-1.12) | 1.01 (0.96-1.05)         |
| Abruptio placentae                                           | 1.72 (1.05-2.83) | 1.76 (1.03-3.00)         | 1.16 (0.97-1.39) | 1.02 (0.83-1.26)         | 0.89 (0.81-0.98) | 0.83 (0.74-0.92)         |
| Placenta praevia                                             | 0.50 (0.12-2.00) | 0.57 (0.14-2.30)         | 0.32 (0.19-0.53) | 0.28 (0.16-0.50)         | 0.52 (0.43-0.61) | 0.52 (0.43-0.63)         |
| PPH > 1000 ml (VB)                                           | 0.70 (0.54-0.89) | 0.65 (0.48-0.88)         | 0.57 (0.53-0.61) | 0.64 (0.59-0.70)         | 0.71 (0.69-0.74) | 0.78 (0.75-0.81)         |
| PPH > 1000 ml (CS)                                           | 0.73 (0.18-2.93) | 0.52 (0.07-3.74)         | 0.87 (0.59-1.27) | 1.16 (0.77-1.93)         | 0.99 (0.92-1.07) | 1.09 (0.93-1.28)         |
| Epidural analgesia <sup>‡</sup>                              | 1.03 (0.95-1.12) | 1.03 (0.93-1.13)         | 1.07 (1.06-1.08) | 1.07 (1.04-1.10)         | 1.02 (1.01-1.03) | 1.03 (1.01-1.04)         |
|                                                              | 30 - 34 years    |                          | 35 - 39 years    |                          | 40+ years        |                          |
| Perineal laceration grade 1-2 <sup>‡</sup>                   | 1.33 (1.31-1.34) | 1.11 (1.10-1.13)         | 1.37 (1.34-1.40) | 1.08 (1.05-1.10)         | 1.32 (1.25-1.39) | 1.00 (0.94-1.07)         |
| Perineal laceration grade 3-4 <sup>‡</sup>                   | 1.31 (1.27-1.36) | 1.16 (1.12-1.20)         | 1.29 (1.23-1.36) | 1.12 (1.05-1.18)         | 1.10 (0.96-1.26) | 0.88 (0.75-1.02)         |
| Preeclampsia                                                 | 0.95 (0.92-0.99) | 1.07 (1.03-1.12)         | 1.18 (1.12-1.25) | 1.30 (1.22-1.39)         | 1.60 (1.44-1.79) | 1.83 (1.62-2.06)         |
| Abruptio placentae                                           | 1.19 (1.09-1.30) | 1.27 (1.16-1.40)         | 1.59 (1.42-1.78) | 1.71 (1.50-1.94)         | 2.11 (1.70-2.63) | 2.09 (1.62-2.71)         |
| Placenta praevia                                             | 1.77 (1.58-1.99) | 1.74 (1.53-2.00)         | 3.55 (3.11-4.06) | 3.47 (2.99-4.03)         | 5.02 (4.00-6.29) | 5.23 (4.08-6.70)         |
| PPH > 1000 ml (VB)                                           | 1.41 (1.37-1.45) | 1.27 (1.23-1.31)         | 1.69 (1.62-1.76) | 1.47 (1.40-1.53)         | 1.86 (1.69-2.05) | 1.48 (1.26-1.52)         |
| PPH > 1000 ml (CS)                                           | 1.14 (1.01-1.28) | 1.04 (0.91-1.18)         | 1.06 (0.91-1.24) | 0.95 (0.81-1.12)         | 1.48 (1.17-1.88) | 1.35 (1.05-1.73)         |
| Epidural analgesia <sup>‡</sup>                              | 1.08 (1.06-1.09) | 1.03 (1.02-1.05)         | 1.14 (1.12-1.17) | 1.06 (1.04-1.09)         | 1.10 (1.04-1.15) | 0.98 (0.93-1.03)         |

Reference group: Maternal age 25-29 years.

CI = confidence intervals; CS = Caesarean section; GA = gestational age at delivery; N/A = not applicable; aOR = adjusted odds ratio; PPH = postpartum haemorrhage; VD = vaginal birth.

<sup>†</sup> Adjusted for maternal BMI and smoking habits at first antenatal care visit and year of birth. CS and preeclampsia also adjusted for gestational age. <sup>‡</sup> Caesarean section was subdivided into elective and acute CS from 1999. <sup>‡</sup> Forceps, vacuum extraction, epidural analgesia and perineal lacerations among vaginally delivered women.

Table 4. Neonatal outcome data in singleton primiparous women in the period 1992-2010 in relation to maternal age group.

| Characteristics                | Crude OR (95%CI) |                  | aOR (95%CI) <sup>†</sup> |                  | Crude OR (95%CI) |                  | aOR (95%CI) <sup>†</sup> |  |
|--------------------------------|------------------|------------------|--------------------------|------------------|------------------|------------------|--------------------------|--|
|                                | < 17 years       |                  | 17-19 years              |                  | 20-24 years      |                  | 30 - 34 years            |  |
| Foetal distress                | 0.62 (0.31-1.24) | 0.52 (0.22-1.26) | 0.76 (0.63-0.91)         | 0.63 (0.51-0.79) | 0.93 (0.86-1.01) | 0.79 (0.72-0.91) |                          |  |
| Aspiration of meconium         | N/A              | N/A              | 0.47 (0.32-0.67)         | 0.46 (0.31-0.70) | 0.90 (0.80-1.03) | 0.93 (0.81-1.07) |                          |  |
| Shoulder dystocia <sup>‡</sup> | 0.45 (0.11-1.82) | 0.32(0.05-2.29)  | 0.74 (0.58-0.90)         | 0.74 (0.52-1.07) | 1.01 (0.88-1.16) | 1.00 (0.86-1.16) |                          |  |
| Stillbirth                     | 0.99 (0.47-2.08) | 0.58 (0.19-1.80) | 1.15 (0.94-1.42)         | 0.97 (0.75-1.25) | 1.03 (0.93-1.15) | 0.98 (0.87-1.11) |                          |  |
| SGA                            | 1.32 (1.07-1.63) | 1.00 (0.78-1.28) | 1.31 (1.23-1.40)         | 1.01 (0.94-1.09) | 1.11 (1.07-1.14) | 1.00 (0.96-1.04) |                          |  |
| LGA                            | 1.01 (0.75-1.34) | 1.08 (0.76-1.53) | 0.92 (0.84-1.00)         | 1.03 (0.94-1.14) | 1.05 (1.00-1.09) | 1.05 (1.00-1.10) |                          |  |
| Apgar score < 7 at 5 minutes   | 1.31 (0.96-1.77) | 1.30 (0.91-1.86) | 0.92 (0.83-1.03)         | 0.92 (0.81-1.11) | 0.93 (0.89-0.99) | 0.93 (0.88-0.98) |                          |  |
|                                | 30 - 34 years    |                  | 35 - 39 years            |                  | 40+ years        |                  |                          |  |
| Foetal distress                | 0.96 (0.89-1.04) | 1.23 (1.13-1.35) | 1.14 (1.02-1.27)         | 1.51 (1.33-1.72) | 0.98 (0.75-1.28) | 1.60 (1.20-2.13) |                          |  |
| Aspiration of meconium         | 1.27 (1.13-1.42) | 1.36 (1.20-1.54) | 1.42 (1.21-1.67)         | 1.48 (1.24-1.77) | 1.83 (1.34-2.51) | 1.82 (1.28-2.58) |                          |  |
| Shoulder dystocia <sup>‡</sup> | 1.18 (1.04-1.35) | 1.13 (0.90-1.41) | 1.13 (0.91-1.39)         | 1.13 (0.91-1.41) | 1.47 (0.93-2.33) | 1.27 (0.76-2.12) |                          |  |
| Stillbirth                     | 1.26 (1.14-1.38) | 1.25 (1.12-1.39) | 1.85 (1.64-2.10)         | 1.72 (1.49-1.99) | 2.77 (2.22-3.46) | 2.34 (1.80-3.03) |                          |  |
| SGA                            | 1.20 (1.16-1.24) | 1.24 (1.20-1.28) | 1.63 (1.56-1.70)         | 1.65 (1.58-1.73) | 2.04 (1.87-2.22) | 2.06 (1.87-2.26) |                          |  |
| LGA                            | 0.94 (0.91-0.98) | 0.94 (0.90-0.98) | 1.03 (0.97-1.09)         | 0.97 (0.91-1.04) | 1.07 (0.93-1.22) | 0.94 (0.81-1.09) |                          |  |
| Apgar score < 7 at 5 minutes   | 1.18 (1.13-1.24) | 1.18 (1.12-1.24) | 1.47 (1.38-1.56)         | 1.39 (1.29-1.49) | 1.65 (1.44-1.88) | 1.51 (1.30-1.75) |                          |  |

Reference group: Maternal age 25-29 years.

CI = confidence interval; LGA = large for gestational age; N/A = not applicable; aOR = adjusted odds ratio; SGA = small for gestational age

<sup>†</sup> Adjusted for maternal BMI and smoking habits at first antenatal care visit and year of birth

<sup>‡</sup> Shoulder dystocia among vaginal delivered women.

1 ***Mode of delivery, obstetric and neonatal outcome of adolescents***

2  
3  
4 2 Compared with the reference group the teenagers had a significantly higher likelihood of having  
5  
6 3 spontaneous onset of labour and of having a normal vaginal delivery. Teenagers also demonstrated a  
7  
8  
9 4 significantly higher risk of giving birth prematurely. However, only the group of teenagers younger  
10  
11 5 than 17 years of age had an increased risk of giving birth very prematurely i.e. before 28 weeks of  
12  
13 6 gestational age, and the same group revealed a significantly higher risk of placental abruption. In  
14  
15  
16 7 contrast with these observations the teenagers were delivered instrumentally and by CS significantly  
17  
18 8 less often, and the vaginal births caused significantly fewer perineal lacerations (only evaluated among  
19  
20 9 women who delivered vaginally) and PPH > 1000 ml. Likewise the occurrence of placenta previa was  
21  
22  
23 10 seen less often among teenagers whereas the occurrence of preeclampsia was equal to that seen in the  
24  
25 11 reference group.

26  
27  
28 12 Concerning the foetal and neonatal outcomes for adolescents the newborns were less likely to show  
29  
30 13 foetal distress and meconium aspiration in spite of a similar occurrence of Apgar score < 7 at 5  
31  
32 14 minutes. The newborns of the adolescents were not more prone to being stillborn or being SGA than  
33  
34  
35 15 the newborns of women in the reference group. The adjusted mean birth weight of newborns of  
36  
37 16 adolescents did not differ significantly from that of women up to 29 years of age (Figure 1).

38  
39  
40 17 ***Mode of delivery, obstetric and neonatal outcome of women 20-24 years of age***

41  
42 18 The young women, 20 – 24 years of age, differed in some aspects from the reference group as well as  
43  
44  
45 19 from the adolescents. They were less likely to be delivered prematurely and had a lower frequency of  
46  
47 20 placental abruption. Otherwise the obstetric and neonatal outcomes were similarly favourable as those  
48  
49  
50 21 observed for the adolescents in comparison with the reference group.

51  
52 22 ***Mode of delivery, obstetric and neonatal outcome of women older than 29 years of age***

53  
54  
55 23 As shown in Table 3 compared with the reference group almost all obstetric outcome variables  
56  
57 24 demonstrated a continuously progressive deterioration with increasing age. The likelihood of normal  
58  
59  
60

1 25 vaginal births decreased; induced labour, instrumental deliveries and CS increased as well as  
2  
3  
4 26 prematurity including very premature deliveries. The risk of perineal laceration increased moderately  
5  
6 27 whereas the risk of PPH > 1000 ml in vaginal births was more pronounced. The likelihood of the  
7  
8 28 pregnancy complications preeclampsia, abruptio placenta and placenta previa was also higher in the  
9  
10 29 older age groups and progressed substantially with increasing age. Similarly, the foetal and neonatal  
11  
12 30 outcome was adversely progressively influenced by increasing maternal age. With increasing maternal  
13  
14 31 age over 30 years significantly more neonates were SGA, showed foetal distress, had Apgar score < 7  
15  
16 32 at 5 minutes or meconium aspiration, or were stillborn. The mean birth weight of the neonates also  
17  
18 33 decreased significantly with increasing maternal age after the age of 30 (Figure 1).  
19  
20  
21  
22  
23 34  
24  
25  
26  
27  
28  
29  
30  
31  
32  
33  
34  
35  
36  
37  
38  
39  
40  
41  
42  
43  
44  
45  
46  
47  
48  
49  
50  
51  
52  
53  
54  
55  
56  
57  
58  
59  
60

## DISCUSSION

This Swedish nation-wide population-based study with prospectively collected data concerning singleton primiparous women showed that the mode of delivery differed over the maternal age strata. Significantly more normal vaginal deliveries and fewer CS and instrumental vaginal deliveries were seen among the teenagers and among women aged 20-24 compared with the reference group of women aged 25-29. The opposite was found among older women reaching a 4-fold increased risk for CS compared with women aged 20-24. The teenagers as well as women aged 20-24 were less prone to perineal lacerations and PPH exceeding 1000 ml. Prematurity (< 28 weeks of GA) was associated with very low maternal age (<17 years) among the adolescents although the increased risk was at the same level as among women aged 40 years and above, indicating a u-shaped risk curve. Adolescents were not afflicted more by preeclampsia than the reference women whereas the risk of preeclampsia increased significantly with advancing maternal age. The risk of placenta praevia increased dramatically with maternal age, actually a 500% increased risk was found after the age of 40 compared with the reference group. There was a significantly increased risk of stillbirth, SGA and low Apgar score only in women aged 30 years and over.

The most prominent difference between the findings in the present study and earlier studies is that no increased risk for SGA was found among the adolescents and young mothers 20-24 years of age compared with the reference women.[8-9] It must be kept in mind that the definition of SGA may differ between countries. In the United States and Latin America SGA is usually defined as birth weight below the 10<sup>th</sup> percentile compared with two SD in the Nordic countries.[3, 9] Adjusted risks for SGA among teenagers, recently presented from Finland, one of the Nordic countries, showed no increased risk among the youngest mothers.[6] In that study the control group was defined in the same way as in the present study but the Finnish study did not adjust for smoking habits. We found that smoking in early pregnancy was a significant independent risk factor for SGA in all age groups but it was only in the young women below 25 years of age that the adjustment of smoking turned the statistically



1 60 significant crude ORs into non-significant adjusted OR values. The contrary was found for the older  
2  
3 61 women where the already significant crude ORs for SGA even became increased. This observation  
4  
5 62 may support a biological explanation for SGA in the older women. Differences concerning the risk for  
6  
7  
8 63 SGA could also be attributable to differences in socio-economic status. Chen et al. restricted their  
9  
10  
11 64 analysis to white married mothers with age-appropriate education level, adequate prenatal care, without  
12  
13 65 smoking and alcohol use during pregnancy but found the increased risk for SGA to persist.[3] Several  
14  
15 66 studies have shown low infant birth weight for adolescents as well as for mothers with advancing  
16  
17  
18 67 age.[18, 14, ~~2830~~, ~~2931~~] We failed to find such association among the adolescents, but in women with  
19  
20 68 advancing age the difference in birth weight was statistically significant although the difference lacked  
21  
22 69 clinical significance.

23  
24  
25 70 The finding of a preferable birth outcome with lower CS rates and lower rates of instrumental delivery  
26  
27 71 among teenagers compared with older women has been pinpointed to a lesser extent than observed  
28  
29  
30 72 adverse outcomes. Earlier studies have shown relatively consistent results concerning a decreased rate  
31  
32 73 of CS in the adolescent group and a higher rate in women with advancing age.[6, 8, 9, 12-18] We were  
33  
34 74 able to evaluate elective and emergency CS separately and the risks among the teenagers and mothers  
35  
36  
37 75 age 20-24 years were decreased for both types. This might indicate that the different risks concerning  
38  
39 76 CS among young and older mothers could not exclusively be explained by more CS on maternal  
40  
41 77 request among older mothers but may even be caused by biological factors. A low rate of instrumental  
42  
43  
44 78 deliveries and CS among adolescents and a high rate among older women have almost unanimously  
45  
46 79 been shown in several reports from high-income as well as low-income countries.[5, 7, 12-18, ~~30-3328-~~  
47  
48  
49 80 ~~31~~] Whether this phenomenon depends on differences in handling the delivery, inherent or cultural  
50  
51 81 behavioural, domestic or social attitudes among the obstetric staff or biological factors has not been  
52  
53 82 investigated. Advancing age is associated with impaired uterine contractility as well as endothelial  
54  
55  
56 83 dysfunction which theoretically may lead to impaired uterine and utero-placental function.[~~3234~~, ~~3335~~]  
57  
58 84 The fact that adolescents in our study had a lower risk of induction of labour, perineal laceration, PPH,  
59  
60

1 85 abruption (except for the very young women) and placenta previa and women with advancing age had  
2  
3  
4 86 higher risks of all these outcomes including preeclampsia could support a biological explanation.  
5  
6 87 Concerning prematurity the age related risk curve was U shaped. This may also support a biological  
7  
8 88 aetiology; immaturity of the uterus in the very young women that obstruct development of a term  
9  
10  
11 89 pregnancy and uterine dysfunction caused by ageing processes in women with advancing age and  
12  
13 90 consequently deliver prematurely in both situations. The neonatal outcomes followed almost the same  
14  
15 91 pattern; foetal distress, meconium aspiration, stillbirth, SGA and low Apgar score were exclusively  
16  
17  
18 92 attributed to women older than 29.  
19  
20 93 The strength of this study is that it deals with the outcomes in the population of an entire country where  
21  
22 94 the antenatal care program is equally available to all pregnant women and is comprehensive. In Sweden  
23  
24  
25 95 pregnant women have completely cost free access to antenatal and obstetric facilities; poverty and  
26  
27 96 malnutrition are practically non-existent and the vast majority of women attends the antenatal care  
28  
29  
30 97 program (99%) independent of socio-economic status and is delivered in obstetric units.[21] This  
31  
32 98 context is valid for the whole study period. Another advantage is the large number of individuals  
33  
34 99 available for evaluation, which makes it possible to divide the study population into subgroups with  
35  
36  
37 100 sufficient numbers in each stratum to provide high statistical power. A sufficient number of study  
38  
39 101 subjects made it possible to evaluate three subgroups of young maternal age. Only primiparous women  
40  
41 102 were included in order to avoid the confounding effects of factors associated with subsequent  
42  
43  
44 103 deliveries. There are limitations that should be considered. The external validity is reduced to facilities  
45  
46 104 with similar socio-economic and demographic characteristics and health care systems with comparable  
47  
48  
49 105 standards. The drawback is obvious given the large size of the study and the numbers of health care  
50  
51 106 units involved that the criteria for diagnosis (ICD codes) to define outcomes may not be uniform across  
52  
53 107 the study population but the variation is most likely not related to maternal age. The MBR contain a  
54  
55  
56 108 large body of information concerning the mother and the child which made it possible to adjust the  
57  
58 109 results for confounding factors. At the same time this is a limitation as only the data available in the  
59  
60

1 110 register could be used for adjustments. The register lacks information on ethnicity and socio-economic  
2  
3  
4 111 status. Our effort was to evaluate obstetric and neonatal outcome in different maternal age groups  
5  
6 112 compared with women aged 25-29 overall. The only stratifications made were for year of birth,  
7  
8 113 maternal BMI and smoking in early pregnancy. The data on year of birth showed that there is  
9  
10  
11 114 variability in the existence of obstetric and neonatal diagnoses during the observation period. This may  
12  
13 115 be due to true changes but may also be a result of changes in recording, including the expanding use of  
14  
15 116 computerized medical records. It was therefore necessary to adjust for year of birth. Maternal BMI,  
16  
17  
18 117 maternal smoking and gestational age (for some relevant outcomes) were included in the adjusted  
19  
20 118 analyses based on their well known association with maternal and foetal outcome.[26,27] Putative  
21  
22 119 confounders and intermediaries were not identified with statistical analysis. To demonstrate causality  
23  
24  
25 120 between the different outcomes evaluated in the analyses and maternal age a great number of putative  
26  
27 121 intermediaries could have been considered such as the use of fertility treatment, foetal size, gestational  
28  
29  
30 122 weight gain etc., but that was not the purpose of the study. ~~A true confounder affects both the exposure  
31  
32 123 and the outcome.~~ There may be other variables (which are not intermediaries) but we have not been  
33  
34 124 able to identify them. ~~If we take for instance maternal hypertension as an example, it could be of  
35  
36  
37 125 interest. But as the higher risk of hypertension is a consequence of maternal age, it is not a true  
38  
39 126 confounder but an intermediary, a way in which high maternal age can affect obstetric and neonatal  
40  
41 127 pathology.~~ The proportion of missing data concerning the included confounders could have affected the  
42  
43  
44 128 results. The youngest age group had the highest frequency of missing data on BMI (20.7%) and  
45  
46 129 smoking (7.7%) compared with the reference group (13.1% and 4.9%, respectively). The distribution of  
47  
48  
49 130 BMI in the youngest age group was almost equal to the other maternal age groups. One explanation for  
50  
51 131 a higher proportion of missing data in the youngest age group could be a later detection of their  
52  
53 132 pregnancies and attendance to the antenatal care and questions concerning exposure in early pregnancy  
54  
55  
56 133 were not raised. Gestational age could be calculated for more than 99% of the study subjects in this  
57  
58 134 study with just minimal variations between maternal age groups.  
59  
60

1 135 Our approach of analysing the data may be a benefit for clinicians interpreting the results when dealing  
2  
3  
4 136 with young and aged mothers.

5  
6 137 In conclusion, in a country with a highly developed social and antenatal maternity health care security  
7  
8 138 system giving cost free maternity and obstetric care to all pregnant women adolescents had a decreased  
9  
10  
11 139 risk for adverse obstetric and neonatal outcome compared with the reference group. In the same social  
12  
13 140 context childbirth at advanced maternal age was associated with a number of serious complications for  
14  
15 141 both the woman and the child. For clinicians counselling young mothers it is of great importance to  
16  
17  
18 142 highlight the positive consequences that less obstetric complications and favourable neonatal outcomes  
19  
20 143 are expected. The results imply that there is a need for individualizing the antenatal surveillance  
21  
22  
23 144 programs and obstetric care based on age grouping in order to attempt to improve the outcomes in the  
24  
25 145 age groups with less favourable obstetric and neonatal outcomes. Such changes in surveillance  
26  
27 146 programs and obstetric interventions need to be evaluated in further studies.

28  
29  
30 147

31

32

33

34

35

36

37

38

39

40

41

42

43

44

45

46

47

48

49

50

51

52

53

54

55

56

57

58

59

60

1  
2  
3  
4  
5  
6  
7  
8  
9  
10  
11  
12  
13  
14  
15  
16  
17  
18  
19  
20  
21  
22  
23  
24  
25  
26  
27  
28  
29  
30  
31  
32  
33  
34  
35  
36  
37  
38  
39  
40  
41  
42  
43  
44  
45  
46  
47  
48  
49  
50  
51  
52  
53  
54  
55  
56  
57  
58  
59  
60

148 **Funding:** The study was supported financially by grants from the County Council of Östergötland and  
149 Linköping University.

150 **Disclosure of interest:** None of the authors has any conflict of interest to declare.

151 **Contribution of authorship:** The study was planned and conducted by PK, MB and RBT, Data was  
152 analysed by all three. All authors contributed to the interpretation of the results, the elaboration of the  
153 manuscript and approval of the final version.

154 **Checklist:** The manuscript conforms to the STROBE requirement.

155 **Data sharing statement:** Technical appendix, statistical code, and dataset available from the  
156 corresponding author at Dryad repository, who will provide a permanent, citable and open access home  
157 for the dataset.

1 158 **REFERENCE LIST**

- 2  
3  
4 159 1. Olausson PM, Cnattingius S, Goldenberg RL. Determinants of poor pregnancy outcomes among  
5  
6 160 teenagers in Sweden. *Obstet Gynecol* 1997;89:451-7.  
7  
8  
9 161 2. Olausson PO, Cnattingius S, Haglund B. Teenage pregnancies and risk of late fetal death and  
10  
11 162 infant mortality. *Br J Obstet Gynaecol* 1999;106:116-21.  
12  
13 163 3. Chen XK, Wen SW, Fleming N, et al. Teenage pregnancy and adverse birth outcomes: a large  
14  
15 164 population based retrospective cohort study. *Int J Epidemiol* 2007;36:368-73.  
16  
17  
18 165 4. Gupta N, Kiran U, Bhal K. Teenage pregnancies: obstetric characteristics and outcome. *Eur J*  
19  
20 166 *Obstet Gynecol Reprod Biol* 2008;137:165–71.  
21  
22  
23 167 5. de Vienne CM, Creveuil C, Dreyfus M. Does young maternal age increase the risk of adverse  
24  
25 168 obstetric, fetal and neonatal outcomes: a cohort study. *Eur J Obstet Gynecol Reprod Biol*  
26  
27 169 2009;147:151–6.  
28  
29  
30 170 6. Leppälähti S, Gissler M, Mentula M, et al. Is teenage pregnancy an obstetric risk in a welfare  
31  
32 171 society? A population-based study in Finland, from 2006 to 2011. *BMJ Open*  
33  
34 172 2013;19:3:e003225.  
35  
36  
37 173 7. Lao TT, Ho LF. Obstetric outcome of teenage pregnancies. *Hum Reprod* 1998;13:3228-32.  
38  
39 174 8. Malabarey OT, Balayla J, Klam SL, et al. Pregnancies in young adolescent mothers: a  
40  
41 175 population-based study on 37 million births. *J Pediatr Adolesc Gynecol* 2012;25:98-102.  
42  
43  
44 176 9. Conde-Agudelo A, Belizán JM, Lammers C. Maternal-perinatal morbidity and mortality  
45  
46 177 associated with adolescent pregnancy in Latin America: Cross-sectional study. *Am J Obstet*  
47  
48 178 *Gynecol* 2005;192:342-9.  
49  
50  
51 179 10. Mukhopadhyay P, Chaudhuri RN, Paul B. Hospital-based perinatal outcomes and complications  
52  
53 180 in teenage pregnancy in India. *J Health Popul Nutr* 2010;28:494-500.  
54  
55  
56 181 11. Ayuba II, Gani O. Outcome of teenage pregnancy in the niger delta of Nigeria. *Ethiop J Health*  
57  
58 182 *Sci* 2012;22:45-50.  
59  
60

- 1 183 12. Jolly M, Sebire N, Harris J, et al. The risks associated with pregnancy in women aged 35 years or  
2  
3  
4 184 older. *Hum Reprod* 2000;15:2433-7.
- 5  
6 185 13. Jacobsson B, Ladfors L, Milsom I. Advanced maternal age and adverse perinatal outcome. *Obstet*  
7  
8 186 *Gynecol* 2004;104:727-33.
- 9  
10  
11 187 14. Cleary-Goldman J, Malone FD, Vidaver J, et al. Impact of maternal age on obstetric outcome.  
12  
13 188 *Obstet Gynecol* 2005;105:983-90.
- 14  
15 189 15. Joseph KS, Allen AC, Dodds L, et al. The perinatal effects of delayed child bearing. *Obstet*  
16  
17  
18 190 *Gynecol* 2005;105:1410-8.
- 19  
20 191 16. Luke B, Brown MB. Elevated risks of pregnancy complications and adverse outcomes with  
21  
22 192 increasing maternal age. *Hum Reprod* 2007;22:1264-72.
- 23  
24  
25 193 17. Delbaere I, Verstraelen H, Goetgeluk S, et al. Pregnancy outcome in primiparae of advanced  
26  
27 194 maternal age. *Eur J Obstet Gynecol Reprod Biol* 2007;135:41-6.
- 28  
29  
30 195 18. Hsieh TT, Liou JD, Hsu JJ, et al. Advanced maternal age and adverse perinatal outcomes in an  
31  
32 196 Asian population. *Eur J Obstet Gynecol Reprod Biol* 2010;148:21-6.
- 33  
34 197 19. Matsuda Y, Kawamichi Y, Hayashi K, et al. Impact of maternal age on the prevalence of  
35  
36 198 obstetrical complications in Japan. *J Obstet Gynaecol Res* 2011;37:1409-14.
- 37  
38  
39 199 20. Biro MA, Davey MA, Carolan M, et al. Advanced maternal age and obstetric morbidity for  
40  
41 200 women giving birth in Victoria, Australia: A population-based study. *Aust N Z J Obstet*  
42  
43 201 *Gynaecol*.2012;52:229-34.
- 44  
45  
46 202 21. Lindmark G, Cnattingius S. The scientific basis of antenatal care routines: Report from a state-of-  
47  
48 203 art conference. *Acta Obstet Gynecol Scand* 1991;70:105-9.
- 49  
50  
51 204 22. Källen B, Källen K, Olausson PO. The Swedish Medical Birth Register: a summary of content  
52  
53 205 and quality. Research Report, Article no: 2003-112-3. Centre for Epidemiology, National Board  
54  
55 206 of Health and Welfare Stockholm 2003. Available from:  
56  
57  
58 207 <http://www.socialstyrelsen.se/publikationer2003/2003-112-3> (Accessed May 2014.)  
59  
60

- 1 208 23. Cnattingius S, Ericson A, Gunnarskog J, et al. A quality study of a medical birth registry. Scand J  
2  
3  
4 209 Soc Med 1990;18:143-8.  
5  
6 210 24. Axelsson O. The Swedish medical birth register. Acta Obstet Gynecol Scand 2003;82:491.  
7  
8 211 25. Källén B. A birth weight for gestational age standard based on data in the Swedish Medical Birth  
9  
10 212 Registry, 1985-1989. Eur J Epidemiol 1995;11:601-6.  
11  
12  
13 213 26. Cedergren MI. Maternal morbid obesity and the risk of adverse pregnancy outcome. Obstet  
14  
15 214 Gynecol 2004;103:219-24.  
16  
17  
18 215 27. Källén K. The impact of maternal smoking during pregnancy on delivery outcome. Eur J Public  
19  
20 216 Health. 2001;11:329-33.  
21  
22  
23 217 28. Delnord M, Blondel B, Drewniak N, et al. Varying gestational age patterns in cesarean  
24  
25 218 delivery: an international comparison. BMC Pregnancy Childbirth. 2014;14:321. [Epub ahead of  
26  
27 219 print].  
28  
29  
30 220 29. Morisaki N, Togoobaatar G, Vogel JP, et al. Risk factors for spontaneous and provider-initiated  
31  
32 221 preterm delivery in high and low Human Development Index countries: a secondary analysis of  
33  
34 222 the World Health Organization Multicountry Survey on Maternal and Newborn Health. BJOG.  
35  
36 223 2014;121 Suppl 1:101-9. doi: 10.1111/1471-0528.12631.  
37  
38  
39 224 27.—  
40  
41 225 ~~28-30.~~ Shrim A, Ates S, Mallozzi A, et al. Is young maternal age really a risk factor for adverse  
42  
43 pregnancy outcome in a Canadian tertiary referral hospital? J Pediatr Adolesc Gynecol  
44 226 2011;24:218-22.  
45  
46 227  
47  
48 228 ~~29-31.~~ Jivraj S, Nazzal Z, Davies P, et al. Obstetric outcome of teenage pregnancies from 2002 to  
49  
50 2008: the Sheffield experience. J Obstet Gynaecol 2010;30:253-6.  
51 229  
52  
53 230 ~~30-32.~~ Beyer DA, Amari F, Diedrich K, et al. Teenage deliveries in Northern Germany: always a  
54  
55 risk factor for higher surgical delivery rates? Arch Gynecol Obstet 2011;284:535-8.  
56 231  
57  
58  
59  
60



1 232 | ~~31-33.~~ Jolly MC, Sebire N, Harris J, et al. Obstetric risks of pregnancy in women less than 18  
2  
3  
4 233 | years old. *Obstet Gynecol* 2000;96:962-6.

5  
6 234 | ~~32-34.~~ Nelson SM, Telfer EE, Anderson RA. The ageing ovary and uterus: new biological  
7  
8 235 | insights. *Hum Reprod Update* 2013 ;19:67-83.

9  
10  
11 236 | ~~33-35.~~ Taddei S, Viridis A, Ghiadoni L, et al. Endothelium, aging, and hypertension. *Curr*  
12  
13 237 | *Hypertens Rep* 2006;8:84-9.

## 24 241 | LEGENDS

25  
26  
27 242 | Figure 1. Adjusted mean birth weight of neonates in singleton primiparous women in different  
28  
29 243 | maternal age groups. Birth weight adjusted for gestational age, maternal BMI and smoking habits, and  
30  
31 244 | year of delivery. Plots indicate means and bars 95% CI.

1  
2  
3  
4  
5  
6  
7  
8  
9  
10  
11  
12  
13  
14  
15  
16  
17  
18  
19  
20  
21  
22  
23  
24  
25  
26  
27  
28  
29  
30  
31  
32  
33  
34  
35  
36  
37  
38  
39  
40  
41  
42  
43  
44  
45  
46  
47  
48  
49  
50  
51  
52  
53  
54  
55  
56  
57  
58  
59  
60

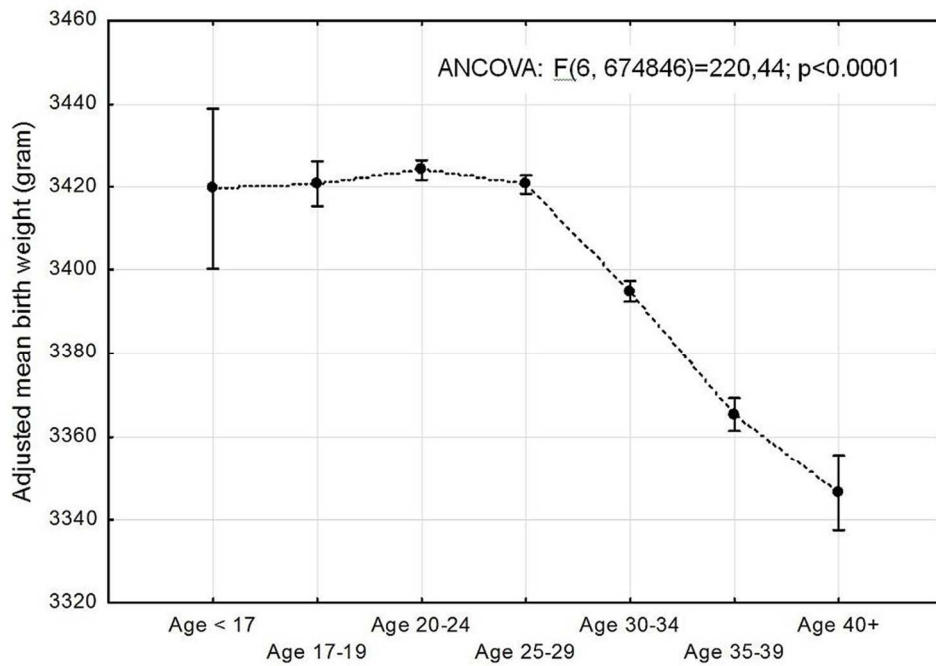

90x66mm (300 x 300 DPI)

Review only

## STROBE Statement—checklist of items that should be included in reports of observational studies

|                              | Item No   | Recommendation                                                                                                                                                                                                                                                                                                                                                                                                                                                                                                                                                                                                                                                                                         |
|------------------------------|-----------|--------------------------------------------------------------------------------------------------------------------------------------------------------------------------------------------------------------------------------------------------------------------------------------------------------------------------------------------------------------------------------------------------------------------------------------------------------------------------------------------------------------------------------------------------------------------------------------------------------------------------------------------------------------------------------------------------------|
| <b>Title and abstract</b>    | <b>1</b>  | (a) Indicate the study's design with a commonly used term in the title or the abstract. Done<br>(b) Provide in the abstract an informative and balanced summary of what was done and what was found Done                                                                                                                                                                                                                                                                                                                                                                                                                                                                                               |
| <b>Introduction</b>          |           |                                                                                                                                                                                                                                                                                                                                                                                                                                                                                                                                                                                                                                                                                                        |
| Background/rationale         | <b>2</b>  | Explain the scientific background and rationale for the investigation being reported. Done                                                                                                                                                                                                                                                                                                                                                                                                                                                                                                                                                                                                             |
| Objectives                   | <b>3</b>  | State specific objectives, including any prespecified hypotheses. Done                                                                                                                                                                                                                                                                                                                                                                                                                                                                                                                                                                                                                                 |
| <b>Methods</b>               |           |                                                                                                                                                                                                                                                                                                                                                                                                                                                                                                                                                                                                                                                                                                        |
| Study design                 | <b>4</b>  | Present key elements of study design early in the paper. Done                                                                                                                                                                                                                                                                                                                                                                                                                                                                                                                                                                                                                                          |
| Setting                      | <b>5</b>  | Describe the setting, locations, and relevant dates, including periods of recruitment, exposure, follow-up, and data collection. Done                                                                                                                                                                                                                                                                                                                                                                                                                                                                                                                                                                  |
| Participants                 | <b>6</b>  | (a) <i>Cohort study</i> —Give the eligibility criteria, and the sources and methods of selection of participants. Describe methods of follow-up. Done<br><i>Case-control study</i> —Give the eligibility criteria, and the sources and methods of case ascertainment and control selection. Give the rationale for the choice of cases and controls<br><i>Cross-sectional study</i> —Give the eligibility criteria, and the sources and methods of selection of participants<br>(b) <i>Cohort study</i> —For matched studies, give matching criteria and number of exposed and unexposed<br><i>Case-control study</i> —For matched studies, give matching criteria and the number of controls per case |
| Variables                    | <b>7</b>  | Clearly define all outcomes, exposures, predictors, potential confounders, and effect modifiers. Give diagnostic criteria, if applicable. Done                                                                                                                                                                                                                                                                                                                                                                                                                                                                                                                                                         |
| Data sources/<br>measurement | <b>8*</b> | For each variable of interest, give sources of data and details of methods of assessment (measurement). Describe comparability of assessment methods if there is more than one group. Done                                                                                                                                                                                                                                                                                                                                                                                                                                                                                                             |
| Bias                         | <b>9</b>  | Describe any efforts to address potential sources of bias. Done                                                                                                                                                                                                                                                                                                                                                                                                                                                                                                                                                                                                                                        |
| Study size                   | <b>10</b> | Explain how the study size was arrived at. All primiparous were included.                                                                                                                                                                                                                                                                                                                                                                                                                                                                                                                                                                                                                              |
| Quantitative variables       | <b>11</b> | Explain how quantitative variables were handled in the analyses. If applicable, describe which groupings were chosen and why. Done                                                                                                                                                                                                                                                                                                                                                                                                                                                                                                                                                                     |
| Statistical methods          | <b>12</b> | (a) Describe all statistical methods, including those used to control for confounding. Done<br>(b) Describe any methods used to examine subgroups and interactions<br>(c) Explain how missing data were addressed. Done<br>(d) <i>Cohort study</i> —If applicable, explain how loss to follow-up was addressed. Done<br><i>Case-control study</i> —If applicable, explain how matching of cases and controls was addressed<br><i>Cross-sectional study</i> —If applicable, describe analytical methods taking account of sampling strategy<br>(e) Describe any sensitivity analyses                                                                                                                    |

Continued on next page

**Results**

|                  |     |                                                                                                                                                                                                                                                                                                                                                                                                                                                               |
|------------------|-----|---------------------------------------------------------------------------------------------------------------------------------------------------------------------------------------------------------------------------------------------------------------------------------------------------------------------------------------------------------------------------------------------------------------------------------------------------------------|
| Participants     | 13* | (a) Report numbers of individuals at each stage of study—eg numbers potentially eligible, examined for eligibility, confirmed eligible, included in the study, completing follow-up, and analysed. Done<br>(b) Give reasons for non-participation at each stage<br>(c) Consider use of a flow diagram                                                                                                                                                         |
| Descriptive data | 14* | (a) Give characteristics of study participants (eg demographic, clinical, social) and information on exposures and potential confounders. Tables.<br>(b) Indicate number of participants with missing data for each variable of interest<br>(c) <i>Cohort study</i> —Summarise follow-up time (eg, average and total amount). Done                                                                                                                            |
| Outcome data     | 15* | <i>Cohort study</i> —Report numbers of outcome events or summary measures over time. Done<br><i>Case-control study</i> —Report numbers in each exposure category, or summary measures of exposure<br><i>Cross-sectional study</i> —Report numbers of outcome events or summary measures                                                                                                                                                                       |
| Main results     | 16  | (a) Give unadjusted estimates and, if applicable, confounder-adjusted estimates and their precision (eg, 95% confidence interval). Make clear which confounders were adjusted for and why they were included. Done only Adjusted Ors are given.<br>(b) Report category boundaries when continuous variables were categorized. Done<br>(c) If relevant, consider translating estimates of relative risk into absolute risk for a meaningful time period. Done. |
| Other analyses   | 17  | Report other analyses done—eg analyses of subgroups and interactions, and sensitivity analyses                                                                                                                                                                                                                                                                                                                                                                |

**Discussion**

|                  |    |                                                                                                                                                                                  |
|------------------|----|----------------------------------------------------------------------------------------------------------------------------------------------------------------------------------|
| Key results      | 18 | Summarise key results with reference to study objectives. Done                                                                                                                   |
| Limitations      | 19 | Discuss limitations of the study, taking into account sources of potential bias or imprecision. Discuss both direction and magnitude of any potential bias. done                 |
| Interpretation   | 20 | Give a cautious overall interpretation of results considering objectives, limitations, multiplicity of analyses, results from similar studies, and other relevant evidence. Done |
| Generalisability | 21 | Discuss the generalisability (external validity) of the study results. Done                                                                                                      |

**Other information**

|         |    |                                                                                                                                                                     |
|---------|----|---------------------------------------------------------------------------------------------------------------------------------------------------------------------|
| Funding | 22 | Give the source of funding and the role of the funders for the present study and, if applicable, for the original study on which the present article is based. Done |
|---------|----|---------------------------------------------------------------------------------------------------------------------------------------------------------------------|

\*Give information separately for cases and controls in case-control studies and, if applicable, for exposed and unexposed groups in cohort and cross-sectional studies.

**Note:** An Explanation and Elaboration article discusses each checklist item and gives methodological background and published examples of transparent reporting. The STROBE checklist is best used in conjunction with this article (freely available on the Web sites of PLoS Medicine at <http://www.plosmedicine.org/>, Annals of Internal Medicine at <http://www.annals.org/>, and Epidemiology at <http://www.epidem.com/>). Information on the STROBE Initiative is available at [www.strobe-statement.org](http://www.strobe-statement.org).
